# Supplementary material for: Linkers of Cell Polarity and Cell Cycle Regulation in the Fission Yeast Protein Interaction Network
Source: PLOS journal article supplement (doi:10.1371/journal.pcbi.1002732), 2012-10-18
Supplement: S6 (10.1371/journal.pcbi.1002732.s006) [file journal.pcbi.1002732.s006]

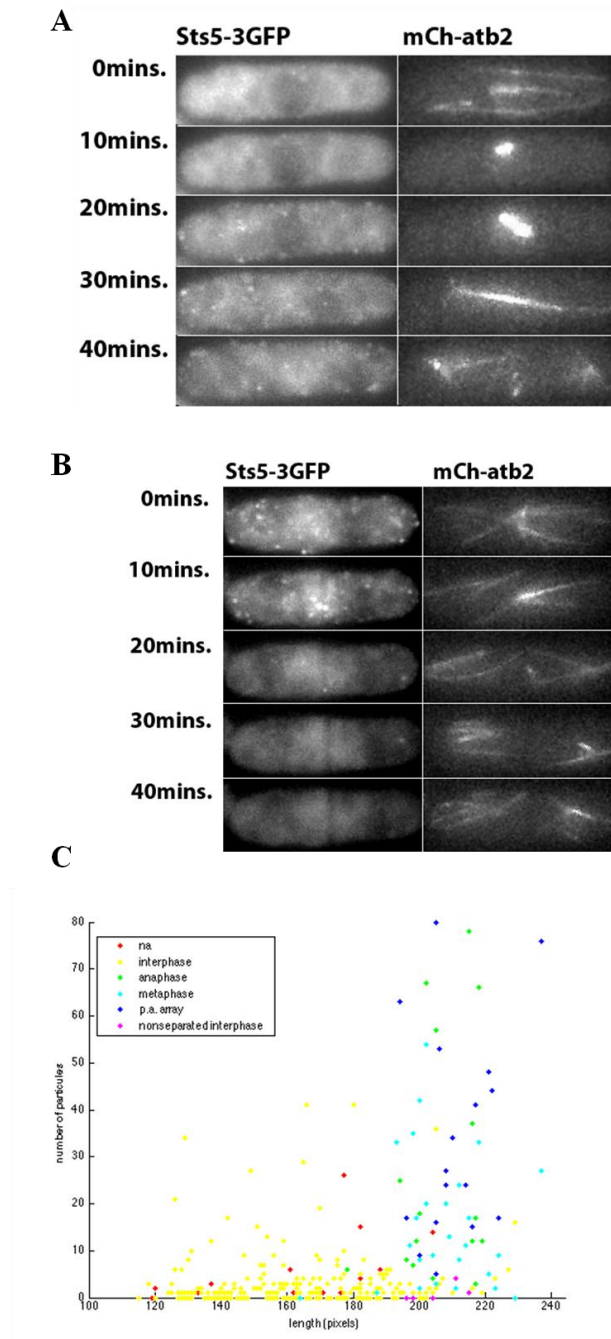

**Figure S6: Time-lapse analysis of Sts5 localization in fission yeast cells.** Microtubules are visualized using mCherry labeled tubulin (Atb2) to identify cell cycle stage (**A** and **B** right column and Sts5-3GFP is visualized on the left). As the cell cycle progresses, Sts5 starts to accumulate into cytoplasmic dots, which then rapidly disappear upon septum formation.

**C** is an automatic quantification of the amount of cytoplasmic dots in cells at different stages of the cell cycle.
