# Supplementary material for: Linkers of Cell Polarity and Cell Cycle Regulation in the Fission Yeast Protein Interaction Network
Source: PLOS journal article supplement (doi:10.1371/journal.pcbi.1002732), 2012-10-18
Supplement: S13 (10.1371/journal.pcbi.1002732.s013) [file journal.pcbi.1002732.s013]

### Text S2: Analysis of the neighbors of high linkerity proteins

We tested the relationship between the linkerity of a node in the network and the functional annotation of its neighbors. To do this, for every node with a given functional annotation, we calculated the ratio of its interactions with neighbors sharing a functional annotation versus neighbors with different functional annotations. For neighbors with multiple functional annotations, we counted each functional annotation individually.

For example, looking at a simplified network:

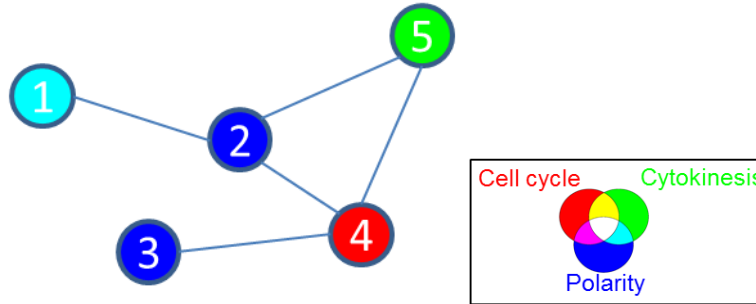

Given node 2 with a polarity functional annotation (in blue), and four neighbours (1, 3, 4, 5) we obtain:

#### Self annotations:

2-1 (Polarity to Polarity)

#### Non-self annotations:

2-1 (Polarity to Cytokinesis)

2-5 (Polarity to Cytokinesis)

2-4 (Polarity to Regulation of Cell Cycle)

Giving a ratio of 1/3.

We then calculated the Spearman correlation between the other/self interaction ratio and the linkerity measure for the proteins in every functional category.

|              | Budding Yeast  |            | Fission Yeast  |            |
|--------------|----------------|------------|----------------|------------|
|              | Spearman Corr: | p-value    | Spearman Corr: | p-value    |
| Polarity:    | 0.49           | $<10^{-9}$ | 0.60           | $<10^{-9}$ |
| Cell Cycle:  | 0.42           | $<10^{-8}$ | 0.30           | $<10^{-7}$ |
| Cytokinesis: | 0.42           | $<10^{-4}$ | 0.36           | $<10^{-4}$ |
