# Supplementary material for: Linkers of Cell Polarity and Cell Cycle Regulation in the Fission Yeast Protein Interaction Network
Source: PLOS journal article supplement (doi:10.1371/journal.pcbi.1002732), 2012-10-18
Supplement: S14 (10.1371/journal.pcbi.1002732.s014) [file journal.pcbi.1002732.s014]

**Text S3: Correlations between linkery and other network measures**

We calculated the Spearman correlation (SC) between various network indices in each of the subnetworks analyzed in the paper. Betweenness and degree are highly correlated in all subnetworks. Linkery is not correlated with any degree or BC, although it shows a significant correlation to the BC of the corresponding node in the core network.

**Budding Yeast:**

**Cell Cycle:**

|                         | Degree:      |     | Linkery: |       |
|-------------------------|--------------|-----|----------|-------|
|                         | p-value:     | SC: | p-value: | SC:   |
| Betweenness Centrality: | $< 10^{-42}$ | 0.8 | .54      | -0.04 |
| Degree:                 |              |     | .95      | .004  |

Core Betweenness Centrality and Linkery Correlation: 0.36, p-value:  $1.4 * 10^{-7}$

**Cytokinesis:**

|                         | Degree:      |      | Linkery: |       |
|-------------------------|--------------|------|----------|-------|
|                         | p-value:     | SC:  | p-value: | SC:   |
| Betweenness Centrality: | $< 10^{-15}$ | 0.68 | .38      | -0.9  |
| Degree:                 |              |      | .90      | -0.01 |

Core Betweenness Centrality and Linkery Correlation: 0.48, p-value:  $3 * 10^{-7}$

**Polarity:**

|                         | Degree:      |     | Linkery: |        |
|-------------------------|--------------|-----|----------|--------|
|                         | p-value:     | SC: | p-value: | SC:    |
| Betweenness Centrality: | $< 10^{-30}$ | 0.8 | .37      | -0.08  |
| Degree:                 |              |     | .88      | -0.012 |

Core Betweenness Centrality and Linkery Correlation: 0.29, p-value: 0.0005

**Fission Yeast:**

**Cell Cycle:**

|                         | Degree:      |      | Linkerity: |       |
|-------------------------|--------------|------|------------|-------|
|                         | p-value:     | SC:  | p-value:   | SC:   |
| Betweenness Centrality: | $< 10^{-45}$ | 0.68 | .46        | -0.04 |
| Degree:                 |              |      | .41        | -0.04 |

Core Betweenness Centrality and Linkerity Correlation: 0.13, p-value: 0.01

**Cytokinesis:**

|                         | Degree:      |      | Linkerity: |       |
|-------------------------|--------------|------|------------|-------|
|                         | p-value:     | SC:  | p-value:   | SC:   |
| Betweenness Centrality: | $< 10^{-14}$ | 0.65 | .60        | -0.05 |
| Degree:                 |              |      | .20        | 0.192 |

Core Betweenness Centrality and Linkerity Correlation: 0.47, p-value:  $1.5 * 10^{-7}$

**Polarity:**

|                         | Degree:      |     | Linkerity: |       |
|-------------------------|--------------|-----|------------|-------|
|                         | p-value:     | SC: | p-value:   | SC:   |
| Betweenness Centrality: | $< 10^{-29}$ | 0.9 | .23        | -0.13 |
| Degree:                 |              |     | .29        | -0.11 |

Core Betweenness Centrality and Linkerity Correlation: 0.35, p-value: 0.0085
