# Supplementary material for: Linkers of Cell Polarity and Cell Cycle Regulation in the Fission Yeast Protein Interaction Network
Source: PLoS Comput Biol. 2012 Oct 18;8(10):e1002732. doi: 10.1371/journal.pcbi.1002732 (PMC3475659; doi:10.1371/journal.pcbi.1002732)
Supplement: Table S1 — Analysis of the genome-wide fission yeast network. See detailed description under Table S2. (XLS) [file pcbi.1002732.s007.xls]

## Sheet: Sheet1
Common name	Systematic name	Description	PubMed	Lethality	BioGRID Physical		STRING
			count	Essential - Viable	BC	Degree	Cutoff = 0.4		Cutoff = 0.7		Cutoff = 0.9
							BC	Degree	BC	Degree	BC	Degree
gls2	SPAC1002.03c	glucosidase II Gls2	3	V			0.000987887	12	3.65928e-06	2	0	1
taf11	SPAC1002.04c	transcription factor TFIID complex subunit Taf11	0	E			4.912e-07	36	0	35	4.05812e-05	12
bqt2	SPAC1002.06c	bouquet formation protein Bqt2	6	V	0.00432104	2	2.9562e-05	7	2.51646e-05	3	0	1
dld1	SPAC1002.09c	dihydrolipoamide dehydrogenase Dld1	1	E			0.00152074	60	0.00106574	20	0.0196186	10
gaa1	SPAC1002.11	GPI-anchor transamidase complex subunit Gaa1	1	E			8.69906e-08	3	0	1	0	1
SPAC1002.12c	SPAC1002.12c	succinate-semialdehyde dehydrogenase	0	V			3.32973e-05	16	6.3002e-05	15	0	1
psu1	SPAC1002.13c	cell wall protein Psu1, beta-glucosidase	3	E	8.08348e-06	3	0.00187833	16	5.20513e-05	8	0	1
pmc5	SPAC1002.15c	mediator complex subunit Pmc5	1	V	0	1	0.00010833	21	0.000719101	20	0.000353415	10
urg2	SPAC1002.17c	uracil phosphoribosyltransferase	2	V			0.000149509	17	0.00022884	5	0	1
urg3	SPAC1002.18	DUF1688 family protein	1	V			6.14263e-06	5	0	1
urg1	SPAC1002.19	GTP cyclohydrolase II	6	V			3.40693e-05	6	0	1
psp3	SPAC1006.01	vacuolar serine protease Psp3	1	V			1.97692e-05	2	0	1
asa1	SPAC1006.02	Astra associated protein 1 Asa1	0	E	0	1	0	6	0	6
red1	SPAC1006.03c	RNA elimination defective protein Red1	8	V	0.00476436	7	0	1	0	1
och1	SPAC1006.05c	alpha-1,6-mannosyltransferase Och1	8	V			6.28595e-05	6	0.00139853	4	0	1
rgf2	SPAC1006.06	RhoGEF Rgf2	3	V	0	1	0.000155497	9	6.70147e-05	7	0.000228234	5
SPAC1006.07	SPAC1006.07	translation initiation factor eIF4A	0	E	0.000774926	2	4.21447e-05	37	0.000312947	36	2.34531e-05	30
etd1	SPAC1006.08	ethanol-hypersensitive mutant protein Etd1	3	E	0.000443865	4	1.36873e-06	5	3.07674e-06	5	9.00001e-08	2
win1	SPAC1006.09	MAP kinase kinase kinase Win1	16	V	0.00016748	2	0.000402372	12	0.000297153	7	0.000249774	3
SPAC1039.07c	SPAC1039.07c	aminotransferase class-III, unknown specificity	0	V			3.77263e-05	6	0	1
SPAC1039.08	SPAC1039.08	serine acetyltransferase	0	V			0.000837016	44	0.00456836	17	0	3
mmf2	SPAC1039.10	homologous Pmf1 factor 1, implicated in isoleucine biosynthesis	0	V			0.000137051	13	0	1
SPAC1039.11c	SPAC1039.11c	alpha-glucosidase	0	V			0	2	0	2	0	2
kha1	SPAC105.01c	potassium ion/proton antiporter Kha1	0	V			0.000162988	4	0	1
pta1	SPAC1071.01c	mRNA cleavage and polyadenylation specificity factor complex subunit Pta1	2	E	0	2	0	11	0	11	0	2
mms19	SPAC1071.02	TFIIH regulator Mms19	1	V	0.00282355	3	6.54244e-07	19	0	18	0	2
arp9	SPAC1071.06	SWI/SNF and RSC complex subunit Arp9	1	V	0.000167758	8	2.8271e-05	18	0.000553116	18	0.00254714	18
rps1502	SPAC1071.07c	40S ribosomal protein S15	0	V	0.000221594	2	0.000196878	151	0.000188415	54	0	6
rpp203	SPAC1071.08	60S acidic ribosomal protein P2C subunit	0	V	0	1	5.45684e-06	107	8.41743e-09	3	0	1
pma1	SPAC1071.10c	P-type proton ATPase, P3-type Pma1	12	E	0	1	0.000643183	8	0.00100435	4
stp1	SPAC1071.12c	dual specificity phosphatase Stp1	9	V			0.00342984	54	0.00308533	7	0	1
SPAC1093.02	SPAC1093.02	pyridoxamine 5'-phosphate oxidase	0	V			0.00120842	25	0.00104968	7	1.8e-07	4
SPAC1093.03	SPAC1093.03	inositol polyphosphate phosphatase	0	V			9.86776e-05	5	0	1	0	1
dhc1	SPAC1093.06c	dynein heavy chain Dhc1	11	V	0.00253665	5	0.00070194	17	0.00276244	13	0.0017091	3
sir1	SPAC10F6.01c	sulfite reductase Sir1	3	V	0	1	0.000123688	22	0.000776557	10	0.00638495	5
prp22	SPAC10F6.02c	ATP-dependent RNA helicase Prp22	3	E	0	4	7.662e-05	4	0	1	0	1
cts1	SPAC10F6.03c	CTP synthase Cts1	3	E	0	1	0.00529481	150	0.00678704	39	0.0128469	23
SPAC10F6.04	SPAC10F6.04	RCC domain protein Ats1	0	V			0	2	0	1
vip1	SPAC10F6.06	RNA-binding protein Vip1	5	V	0	1	0.000210582	2	0	1
nht1	SPAC10F6.08c	Ino80 complex HMG box protein Nht1	0	V	0.000753687	2	0	12	0	12
psm3	SPAC10F6.09c	mitotic cohesin complex subunit Psm3	11	E	0.000233208	3	0.00195902	27	0.000225042	9	0.000337504	5
SPAC10F6.10	SPAC10F6.10	protein kinase, RIO family	0	E			9.28694e-05	44	5.82087e-07	3
atg17	SPAC10F6.11c	autophagy associated protein kinase activator Atg17	0	V			0	1	0	1
mam4	SPAC10F6.12c	protein-S isoprenylcysteine O-methyltransferase Mam4	1	V			0.000593467	3	0	1
SPAC10F6.13c	SPAC10F6.13c	aspartate aminotransferase	0	V			0.000417417	41	0.00142231	40	0.00337473	5
pds5	SPAC110.02	cohesin-associated protein Pds5	5	V	0.00131089	3	6.94147e-06	6	1.75319e-05	5	0.000854821	3
cdc42	SPAC110.03	Rho family GTPase Cdc42	69	E	0.0127008	17	0.00234967	35	0.00576214	32	0.0308635	17
pss1	SPAC110.04c	heat shock protein Pss1	17	E	0.000466889	2	0.000406904	6	0.00139927	3
SPAC1142.02c	SPAC1142.02c	TPR repeat protein, SGT2 family	0	V	0	1	0.00088921	10	0.0014096	3
swi2	SPAC1142.03c	Swi5 complex subunit Swi2	17	V	0.000885215	3	9.71529e-05	8	6.88327e-05	4	0.000338281	2
SPAC1142.04	SPAC1142.04	Noc complex subunit Noc2 family	0	E	0	1	0.000517574	183	6.91558e-05	33	0	2
ctr5	SPAC1142.05	copper transporter complex subunit Ctr5	5	V	0	1	0	2	0	1	0	1
get3	SPAC1142.06	GET complex ATPase subunit Get3	0	V			0.00210541	23	0.00070506	2
vps32	SPAC1142.07c	ESCRT III complex subunit Vps32	1	V			0.00215825	14	4.95786e-06	6	0	1
fhl1	SPAC1142.08	fork head transcription factor Fhl1	1	V			1.8884e-05	4	0	1
SPAC11D3.02c	SPAC11D3.02c	ELLA family acetyltransferase	0	V			0.000341173	16	0	1
SPAC11D3.09	SPAC11D3.09	agmatinase	0	V			2.56597e-06	4	0	2	0	1
SPAC11D3.10	SPAC11D3.10	nifs homolog, possible cysteine desulfurase	0	V			0.000586839	3	0	1
SPAC11D3.15	SPAC11D3.15	5-oxoprolinase	0	V			5.83454e-05	12	0	9	5.40001e-07	3
swr1	SPAC11E3.01c	SNF2 family helicase Swr1	9	V	0.00238079	11	0.00218714	45	0.000113728	16	0.000102539	13
pcs1	SPAC11E3.03	chromosome segregation protein Pcs1	8	V	0.000898648	7	0.000808315	27	0.0035216	26	0.00416971	7
ubc13	SPAC11E3.04c	ubiquitin conjugating enzyme Ubc13	6	V	0	1	2.25654e-05	3	0.000383692	2	0	1
vma4	SPAC11E3.07	V-type ATPase V1 subunit E	0	E			0.000446018	18	0	13	0	11
nse6	SPAC11E3.08c	Smc5-6 complex non-SMC subunit Nse6	2	V	2.04069e-05	7	0.000107595	13	0	6	4.14e-07	6
pyp3	SPAC11E3.09	protein-tyrosine phosphatase Pyp3	6	V	0	1	3.87455e-07	4	0	2	0	1
SPAC11E3.12	SPAC11E3.12	conserved eukaryotic protein	0	V			1.2797e-05	7	0	2	0	1
rpl22	SPAC11E3.15	60S ribosomal protein L22	0	V	0.000539732	4	0.000342989	168	0.00013984	50	3.78e-08	41
pub1	SPAC11G7.02	HECT-type ubiquitin-protein ligase E3 Pub1	8	V			0.00020672	9	0.000216417	5	0	1
idh1	SPAC11G7.03	isocitrate dehydrogenase	3	V			0.000115502	34	0.000204674	18	2.295e-06	5
SPAC11G7.05c	SPAC11G7.05c	mitochondrial [acyl-carrier protein] S-malonyltransferase Mct1	0	V			0.00105966	37	0.000479497	9	0	1
sst6	SPAC11H11.01	ESCRT I complex subunit Vps23	1	V			0	2	0	1
fta6	SPAC11H11.05c	Sim4 and Mal2 associated	1	V	1.85632e-07	4	0.00012107	60	0.000193889	60	0	1
arp2	SPAC11H11.06	ARP2/3 actin-organizing complex subunit Arp2	35	E	0.00108381	5	0.000179376	13	0.000488383	10	0.00241466	7
snf21	SPAC1250.01	ATP-dependent DNA helicase Snf21	3	E	4.24244e-05	12	0.000419753	17	0	12	1.66909e-06	12
atl1	SPAC1250.04c	alkyltransferase-like protein Atl1	3	V	0	1	9.37117e-05	10	0	3
rpl3002	SPAC1250.05	60S ribosomal protein L30	0	V	0	1	0.000261539	145	9.37101e-05	23
SPAC1296.01c	SPAC1296.01c	phosphoacetylglucosamine mutase	0	V			0.000586839	2	0.00070506	2	0	1
cox4	SPAC1296.02	cytochrome c oxidase subunit IV	1	V			0.000187042	35	0.00400098	22	2.16e-07	7
sxa2	SPAC1296.03c	serine carboxypeptidase Sxa2	13	V			8.48381e-05	4	0	1
tah18	SPAC1296.06	NADPH-dependent diflavin oxidoreductase, involved in iron-sulphur cluster assembly Tah18	0	V			0.000334458	8	0	1
bun62	SPAC12B10.03	WD repeat protein, human WDR20 family, Bun62	0	V	0	1	0	1	0	1	0	1
icp55	SPAC12B10.05	mitochondrial intermediate cleavage peptidase Icp55	0	V			0.00070881	18	0.000973544	7
acp1	SPAC12B10.07	F-actin capping protein alpha subunit	3	V	0.000542403	4	0.000582921	22	0.000140613	8	3.6e-07	4
exg2	SPAC12B10.11	glucan glucosidase Exg2, unknown specificity	1	V			0.000345946	11	0.000601009	10
rhp41	SPAC12B10.12c	DNA repair protein Rhp41	3	V			7.24375e-05	24	0.000115755	22	0.000269123	14
mug157	SPAC12B10.16c	conserved protein Mug157	0	V			0	1	0	1
cip2	SPAC12G12.03	RNA-binding protein Cip2	2	V	0	1	7.57056e-05	6	4.6249e-05	4
mcp60	SPAC12G12.04	mitochondrial heat shock protein Hsp60/Mcp60	3	E	0	1	0.0116572	118	0.00606179	19	0.00422453	3
taf9	SPAC12G12.05c	SAGA complex/ transcription initiation factor Taf9	0	E	0	2	0.00130332	55	0.000527373	42	0.000518596	17
SPAC12G12.06c	SPAC12G12.06c	rRNA processing protein	0	E			7.95913e-05	138	5.86385e-06	39	0	2
mrpl6	SPAC12G12.08	mitochondrial ribosomal protein subunit L16	0	E			0.000157528	67	0.000379105	50	0.00106678	23
wdr21	SPAC12G12.10	WD repeat protein, human WDR21 family	0	V	0	1	0	1	0	1	0	1
cid14	SPAC12G12.13c	poly	8	V	0.0564706	139	0.00108893	78	0.00164045	8	0.00455919	5
pfs2	SPAC12G12.14c	WD repeat protein Pfs2	1	E	0	2	0.000405235	18	0.000533437	12	0.000510516	8
SPAC139.05	SPAC139.05	succinate-semialdehyde dehydrogenase	0	V			3.32973e-05	16	6.3002e-05	15	0	1
SPAC1399.01c	SPAC1399.01c	membrane transporter	0	V			6.41939e-05	12	0	2
SPAC1399.04c	SPAC1399.04c	uracil phosphoribosyltransferase	0	V			4.53802e-05	11	0.00022884	5	0	2
rga8	SPAC13A11.01c	Rho-type GTPase activating protein Rga8	1	V	5.22408e-06	4	2.07897e-06	3	1.41301e-05	3	0	1
erg11	SPAC13A11.02c	sterol 14-demethylase	2	E	0	2	0.000767333	25	0.0011269	12	0.00170658	5
mcp7	SPAC13A11.03	meiosis specific coiled-coil protein Mcp7	2	V	0.00108224	3	0.000404219	10	2.04403e-07	3	0	1
ubp8	SPAC13A11.04c	SAGA complex ubiquitin C-terminal hydrolase Ubp8	0	V	6.58695e-07	5	0.00086081	18	0.00215654	7	0.00348251	6
SPAC13A11.05	SPAC13A11.05	peptidase family M17	0	V			0.000709145	45	0.00162443	17	0	2
SPAC13A11.06	SPAC13A11.06	pyruvate decarboxylase	0	V			0.000150806	14	0.000247691	14	0.00563883	5
SPAC13C5.01c	SPAC13C5.01c	20S proteasome component alpha 3	0	V	0	2	2.14308e-05	27	2.08255e-07	14	0	6
SPAC13C5.05c	SPAC13C5.05c	N-acetylglucosamine-phosphate mutase	0	V			0	1	0	1	0	1
rad32	SPAC13C5.07	Rad32 nuclease	47	V	0.00108224	2	0.00319158	55	0.00131692	20	0.00615885	8
pof14	SPAC13D6.01	F-box protein Pof14	1	V	0.00385028	6	1.0942e-05	7	0.000289898	7	0.0114113	4
byr3	SPAC13D6.02c	zinc finger protein Byr3	5	V			0.00125623	69	1.90601e-05	2
trm9	SPAC13D6.03c	tRNA	0	V			1.04053e-05	10	0	2	0	1
btb3	SPAC13D6.04c	substrate adaptor for cullin 3 ubiquitin ligase Btb3	0	V	0	2	0	2	0	2
alp11	SPAC13D6.05	tubulin specific chaperone cofactor B	3	V	0.000100343	4	0.000102251	7	1.61338e-05	5	0.000854821	4
msh1	SPAC13F5.01c	mitochondrial MutS protein Msh1	0	V			3.27214e-05	9	0	2	0	1
ptr6	SPAC13F5.02c	transcription factor TFIID complex subunit Taf7	1	E	0.000150451	2	1.62966e-06	23	0	18	0	4
gld1	SPAC13F5.03c	mitochondrial glycerol dehydrogenase Gld1	2	V	0	1	5.10877e-05	7	0	2	2.7e-07	2
sec10	SPAC13F5.06c	exocyst complex subunit Sec10	0	E	0.000302234	2	4.50819e-05	4	0.000130712	4	0	3
rad8	SPAC13G6.01c	ubiquitin-protein ligase E3 Rad8	7	V			0.000412804	18	0.000295409	10	0	1
rps101	SPAC13G6.02c	40S ribosomal protein S3a	0	V	0.000221594	2	9.13672e-05	149	9.04125e-06	36	0	1
tim8	SPAC13G6.04	TIM22 inner membrane protein import complex subunit Tim8	0	V			0.000251668	18	0	5	0	3
trs33	SPAC13G6.05c	TRAPP complex subunit Trs33	0	E			0	4	0	1
gcv2	SPAC13G6.06c	glycine cleavage complex subunit P	0	V			0.000193746	27	0.000159551	10	0.00308804	6
rps601	SPAC13G6.07c	40S ribosomal protein S6	0	V			9.86138e-05	150	5.62611e-06	22	0	1
erg12	SPAC13G6.11c	mevalonate kinase Erg12	0	E			0.000528799	19	0.000541881	4	3.17686e-05	3
chs1	SPAC13G6.12c	chitin synthase I	6	V			4.53708e-05	3	7.48233e-05	2
erg7	SPAC13G7.01c	lanosterol synthase Erg7	0	E			0.000137084	16	3.45756e-06	9	0	3
ssa1	SPAC13G7.02c	heat shock protein Ssa1	0	V	0.000466889	3	4.64032e-05	14	0	2	0	1
met16	SPAC13G7.06	phosphoadenosine phosphosulfate reductase	0	V	0	1	0.00110337	44	0.00493185	16	0.0017064	6
arb2	SPAC13G7.07	argonaute binding protein 2	1	V			0	2	0	2
crb3	SPAC13G7.08c	WD repeat protein Crb3	2	E	0.00671924	10	1.9674e-05	4	0	1
SPAC13G7.12c	SPAC13G7.12c	choline kinase	0	V			5.81819e-06	2	1.63603e-05	2	0	1
msa1	SPAC13G7.13c	RNA-binding protein Msa1	1	V			8.91002e-05	7	0.000738287	6	0	1
sdh2	SPAC140.01	succinate dehydrogenase	0	V	0	1	0.00474878	83	0.0195741	35	0.00011204	9
gar2	SPAC140.02	nucleolar protein required for rRNA processing	4	V	0.000221594	2	0.00292062	153	0.00136497	8	0.00409794	2
arb1	SPAC140.03	argonaute binding protein 1	1	V			0	2	0	2
cct5	SPAC1420.02c	chaperonin-containing T-complex epsilon subunit Cct5	2	E	0.000366717	2	0.000292412	28	4.63107e-05	17	5.68421e-05	13
rpn501	SPAC1420.03	19S proteasome regulatory subunit Rpn501	3	V	0.00599128	13	4.76719e-05	23	0	4
cox1101	SPAC1420.04c	fusion cytochrome c oxidase assembly protein Cox1101, mitochondrial ribosomal protein Rsm22	2	V			0	12	0	12
iec1	SPAC144.02	Ino80 complex subunit Iec1	1	V			4.66166e-05	13	0	12	0	2
ade2	SPAC144.03	adenylosuccinate synthetase Ade2	8	V			0.00244633	100	0.00434427	36	0.00151646	12
spe1	SPAC144.04c	ornithine decarboxylase Spe1	0	V			0.000575794	25	0.000176834	9	0.000259923	6
SPAC144.08	SPAC144.08	mitochondrial DNAJ domain protein Jac1	0	V			5.251e-06	6	0	3	0	1
gwt1	SPAC144.10c	pig-W	1	E	0	1	0.000202271	5	1.3047e-07	2	0	1
rps1102	SPAC144.11	40S ribosomal protein S11	0	V	0	2	0.000238608	166	0.000222357	66	4.65395e-06	10
SPAC144.12	SPAC144.12	ribose 5-phosphate isomerase	0	E	0	1	0.00459119	184	0.00357242	19	0.000379407	7
srw1	SPAC144.13c	CDK inhibitor Srw1	22	V	0.000580684	4	0.000978775	31	0.000784124	25	0.00343647	11
klp8	SPAC144.14	kinesin-like protein Klp8	0	V			0	5	0	5
SPAC144.17c	SPAC144.17c	6-phosphofructo-2-kinase	0	V			9.90694e-05	8	0.000888001	8	0	2
SPAC1486.01	SPAC1486.01	manganese superoxide dismutase	0	V			0.00183508	69	0.000555407	6	0	2
nup189	SPAC1486.05	nucleoporin Nup98 and Nup96	6	E	0.00037107	2	0.000154654	37	0.000331122	35	0.0167081	6
SPAC1486.06	SPAC1486.06	nicotinate phosphoribosyltransferase	0	E			0.000817393	15	0.00422384	3	0	1
mrpl19	SPAC1486.07c	mitochondrial ribosomal protein subunit L19	0	E			0.00105929	79	0.00198883	39	0.000173976	21
SPAC1486.09	SPAC1486.09	ribosome biogenesis protein Nob1	0	E	0	1	0.00028205	73	0.000646977	5
thi1	SPAC1486.10	transcription factor Thi1	12	V			0.000586839	5	2.6094e-07	2
smc5	SPAC14C4.02c	Smc5-6 complex SMC subunit Smc5	28	E	0.000457654	8	0.000247685	14	0.000126629	8	8.64001e-07	7
mek1	SPAC14C4.03	Cds1/Rad53/Chk2 family protein kinase Mek1	22	V	0.000772797	6	7.75852e-05	8	0.000584702	8	0	1
agn1	SPAC14C4.09	glucan endo-1,3-alpha-glucosidase Agn1	7	V	0.00108224	3	2.29116e-05	5	0.000399457	5	5.40001e-07	2
SPAC14C4.11	SPAC14C4.11	polyphosphate synthetase	0	V			0	1	0	1
laf1	SPAC14C4.12c	clr6 L associated factor 1 Laf1	0	V			1.4645e-05	19	1.65877e-05	19	2.7e-07	2
rad17	SPAC14C4.13	RFC related checkpoint protein Rad17	63	V	0.00263559	7	0.000374016	30	0.0014536	27	6.96089e-05	8
atp1	SPAC14C4.14	F1-ATPase alpha subunit	3	V	0	1	0.00738281	127	0.0105265	35	0.00127661	8
dad3	SPAC14C4.16	DASH complex subunit Dad3	0	V	0	3	0	45	0	45	0	3
sft2	SPAC1527.02	Golgi transport protein Sft2	0	V	0	1	7.22318e-05	3	7.49414e-05	2
SPAC1527.03	SPAC1527.03	RNA-binding protein	0	V	0	1	0	1	0	1
rad50	SPAC1556.01c	DNA repair protein Rad50	49	V	0	1	0.00155571	41	0.000683721	19	0.0044289	10
sdh1	SPAC1556.02c	succinate dehydrogenase Sdh1	0	V			0.00233825	79	0.00126711	22	4.38736e-05	7
cdd1	SPAC1556.04c	cytidine deaminase Ccd1	2	V			0.0018862	40	0.00034425	6	0.000104223	2
pmm1	SPAC1556.07	phosphomannomutase Pmm1	0	E			0.000758786	24	0.000189925	5	0.0227011	2
cbs2	SPAC1556.08c	protein kinase activator	1	V			0.00193957	17	0.000212024	7	0	4
ste4	SPAC1565.04c	adaptor protein Ste4	12	V	0	3	1.46109e-05	6	0	3	0	1
spg1	SPAC1565.06c	GTPase Spg1	25	V	0.000578182	7	0.000347928	20	0.00229324	19	0.00204676	10
cdc48	SPAC1565.08	AAA family ATPase Cdc48	9	E	0.00563754	7	0.00105024	16	0.00705826	12	0.00826402	7
atm1	SPAC15A10.01	mitochondrial ABC family iron transporter Atm1	1	E			0.000739957	6	0.00070506	2
taf12	SPAC15A10.02	transcription factor TFIID complex subunit A/ SAGA complex subunit	0	E	0	2	2.66708e-05	42	0	35	1.78691e-07	10
rhp54	SPAC15A10.03c	Rad54 homolog Rhp54	20	V	0	1	0.000141055	22	0.000234058	12	2.27656e-05	5
mug182	SPAC15A10.05c	YjeF family pyridoxamine-phosphate oxidase	0	V			0.000572011	21	0	1	0	1
SPAC15A10.06	SPAC15A10.06	CPA1 sodium ion/proton antiporter	0	V	0	1	0.00144398	6	0.00302842	3
ain1	SPAC15A10.08	alpha-actinin	2	V			1.39388e-05	8	3.36371e-05	5	0	1
sgo2	SPAC15A10.15	inner centromere protein, shugoshin Sgo2	11	V	0	2	3.85597e-05	46	9.77528e-05	46	0.000202398	4
bud6	SPAC15A10.16	actin interacting protein 3 homolog Bud6	11	V	0.000824938	3	1.4714e-05	4	0	2	0	2
rpl42	SPAC15E1.03	60S ribosomal protein L36/L42	1	V	0.00108224	2	0.00265111	202	0.00845528	112	0.00139695	44
SPAC15E1.04	SPAC15E1.04	thymidylate synthase	0	V			0.00219767	49	0.000986575	16	0.0474775	13
SPAC15E1.05c	SPAC15E1.05c	ethanolamine-phosphate cytidylyltransferase	0	V			0	1	0	1	0	1
vps29	SPAC15E1.06	retromer complex subunit Vps29	1	V	0	1	0.000548381	17	5.60902e-05	4	0	3
moa1	SPAC15E1.07c	meiotic cohesin complex associated protein Moa1	8	V	0.000221555	2	0.000739885	32	0.000319191	27	0.00176422	5
naa10	SPAC15E1.08	NatA N-acetyltransferase complex catalytic subunit Naa10	0	E			0.000589292	35	0	1
grx2	SPAC15E1.09	glutaredoxin Grx2	3	V			2.07285e-05	7	0.00102108	4	0	1
seh1	SPAC15F9.02	nucleoporin Seh1	1	V	0	2	0.000795803	41	0	33	0.00221732	11
nxt2	SPAC15F9.03c	nuclear transport factor Nxt2	3	E	0	1	0.00159547	41	2.21885e-05	3	0	1
rho2	SPAC16.01	Rho family GTPase Rho2	13	V	0.00285525	6	0.000365835	15	0.000230749	7	0.000953052	5
srp2	SPAC16.02c	mRNA export factor Srp2	6	E	0.00333652	4	0.00108224	41	0.0011228	38	0.00322499	11
ura2	SPAC16.03c	dihydroorotase Ura2	3	V			0.000909101	28	2.05457e-05	4	9.9364e-05	2
dus3	SPAC16.04	tRNA dihydrouridine synthase Dus3	0	V			0.000186478	116	0	2
SPAC1610.02c	SPAC1610.02c	mitochondrial ribosomal protein subunit L1	0	V			0.000167686	50	0.000230729	29	4.06432e-06	18
crp79	SPAC1610.03c	poly	4	V	0.080341	82	0.00013516	8	0.000550481	5	0	1
SPAC1635.01	SPAC1635.01	mitochondrial outer membrane voltage-dependent anion-selective channel	0	V	0	1	0.000764248	16	0.00129313	2
trk2	SPAC1639.02c	potassium ion transporter Trk2	8	V			0	1	0	1	0	1
ire1	SPAC167.01	serine/threonine protein kinase Ppk4/ sensor for unfolded proteins in the ER	0	V			0.000222444	10	0	1
ptb1	SPAC167.02	geranylgeranyltransferase II beta subunit Ptb1	2	E			0.000841386	7	0.00070506	2
snu66	SPAC167.03c	U4/U6 x U5 tri-snRNP complex subunit Snu66	3	E	0.00216315	3	1.07428e-06	8	4.61966e-07	2	2.30024e-05	2
pam17	SPAC167.04	TIM23 translocase complex-associated motor subunit Pam17	0	V			0.000138173	10	0	4	0	1
rpc19	SPAC1687.01	DNA-directed RNA polymerase I and III subunit Rpc19	4	E	0	1	0.0011104	148	0.000452002	38	0.00121352	15
rfc4	SPAC1687.03c	DNA replication factor C complex subunit Rfc4	2	E	3.83616e-05	3	0.000253408	35	0.000173553	26	0.000401639	20
pli1	SPAC1687.05	SUMO E3 ligase Pli1	8	V	0.00684948	7	0.000360746	24	0.000500507	15	6.94522e-05	2
rpl44	SPAC1687.06c	60S ribosomal protein L28/L44	0	V	0.000271298	3	0.000192049	133	0.00013984	50	0	40
SPAC1687.07	SPAC1687.07	conserved fungal protein	0	V	0	1	0	1	0	1
spb1	SPAC1687.11	rRNA methyltransferase Spb1	1	E	0	1	0.000759192	171	0.00279492	43	0	5
coq4	SPAC1687.12c	ubiquinone biosynthesis protein Coq4	0	V			3.27303e-05	10	0	3
csn5	SPAC1687.13c	COP9/signalosome complex subunit Csn5	8	V	2.19717e-05	4	0.000576371	21	0.000190402	12	0.00361206	8
gsk3	SPAC1687.15	serine/threonine protein kinase Gsk3	29	V			5.18343e-05	5	9.24234e-06	3
erg31	SPAC1687.16c	C-5 sterol desaturase Erg31	1	V			4.53871e-06	11	0	2	0	1
ssl3	SPAC1687.18c	cohesin loading factor Ssl3	3	E	0	2	0.000121726	7	1.63711e-06	4	0	1
SPAC1687.19c	SPAC1687.19c	queuine tRNA-ribosyltransferase	0	V			0.00345878	68	0.000344399	6
mis6	SPAC1687.20c	inner centromere protein, CENP-I ortholog Mis6	24	E	0.0130044	21	0.00035029	37	0.000879967	33	0.00199371	13
SPAC1687.21	SPAC1687.21	phosphoglycerate mutase family	0	V			0	6	5.73061e-07	6	0	2
puf3	SPAC1687.22c	RNA-binding protein Puf3	0	V	0	1	0	1	0	1
rho4	SPAC16A10.04	Rho family GTPase Rho4	5	V	1.43126e-05	2	0.000278801	7	0.000778632	5
dad1	SPAC16A10.05c	DASH complex subunit Dad1	2	V	0.0078875	17	0.000689852	66	0.000658358	65	0.00519912	20
nse2	SPAC16A10.06c	Smc5-6 complex non-SMC subunit 2	11	E	0.000127935	9	0.000239451	18	0.000255059	10	4.03341e-05	7
taz1	SPAC16A10.07c	human TRF ortholog Taz1	73	V	0.00216381	5	0.00113636	20	0.00379141	20	0.00594033	7
SPAC16C9.02c	SPAC16C9.02c	S-methyl-5-thioadenosine phosphorylase	0	V			0.00264317	122	0.000497776	6	0.00386456	3
nmd3	SPAC16C9.03	export adaptor Nmd3	0	E			0.00213508	232	0.00264565	44	0.00233496	4
mot2	SPAC16C9.04c	CCR4-Not complex subunit Mot2	0	V			0.00165195	30	0.000516455	5	0	2
cph1	SPAC16C9.05	Clr6 histone deacetylase associated PHD protein-1 Cph1	0	V			0	15	0	15	0.00042489	5
upf1	SPAC16C9.06c	ATP-dependent RNA helicase Upf1	2	V	0	2	0.00272772	37	0.00230462	10	0	1
SPAC16E8.04c	SPAC16E8.04c	chorismate mutase	0	E			0.000308798	51	1.3809e-05	5	0	2
nop12	SPAC16E8.06c	RNA-binding protein Nop12	1	V	0	2	0.00142991	147	1.79606e-05	19	0	1
vph1	SPAC16E8.07c	V-type ATPase V0 subunit a	0	E	0	1	0.000472216	15	0.00404087	15	0	11
scd1	SPAC16E8.09	RhoGEF Scd1	22	V	0.00679361	12	0.00118616	21	0.00239156	19	0.0109309	7
SPAC16E8.10c	SPAC16E8.10c	mitochondrial ribosomal protein subunit S7	0	E			4.32206e-05	50	2.82449e-05	27	0	4
tfb1	SPAC16E8.11c	transcription factor TFIIH complex subunit Tfb1	2	E	0	1	0.000158864	62	0.000638429	62	0.00204363	16
tif45	SPAC16E8.15	translation initiation factor eIF4E, 4F complex subunit	1	E	0	1	0.000234207	42	0.00163164	37	6.90227e-06	32
SPAC16E8.16	SPAC16E8.16	transcription factor TFIIB	0	E	0	1	0.000752001	73	0.000771258	40	0.000796725	30
SPAC16E8.17c	SPAC16E8.17c	succinate-CoA ligase alpha subunit	0	V			0.00305886	92	0.00151625	22	6.38216e-05	8
ecm33	SPAC1705.03c	cell wall protein Ecm33	2	V	0	1	0.000701451	7	0	2
gti1	SPAC1751.01c	gluconate transporter inducer Gti1	1	V			7.96904e-07	3	0	2
rsm19	SPAC1751.02c	mitochondrial ribosomal protein subunit S19	0	E			0.000487433	77	0.000631318	53	0.00169546	30
SPAC1751.03	SPAC1751.03	translation initiation factor eIF3m	0	E	0.000910298	10	4.72452e-05	13	5.33059e-05	10	0	8
ecm29	SPAC1782.01	proteasome component Ecm29	0	V	0	2	0	8	0	8	0	4
qcr8	SPAC1782.07	ubiquinol-cytochrome-c reductase complex subunit 7	2	V			0.000721254	31	0.00033622	11	0.00021303	6
clp1	SPAC1782.09c	Cdc14-related protein phosphatase Clp1/Flp1	27	V	0.0102214	12	0.0119245	75	0.00577656	51	0.0238062	16
nhp2	SPAC1782.10c	box H/ACA snoRNP complex subunit Nhp2	3	E			0.00043338	112	0.000149006	17	1.38065e-05	4
met14	SPAC1782.11	adenylyl-sulfate kinase	0	V			0.000539518	30	0.000693588	12	0.00341442	8
fta2	SPAC1783.03	Sim4 and Mal2 associated	1	E	0.000582833	8	0.00012107	60	0.000193889	60	1.56829e-05	7
hst4	SPAC1783.04c	Sir2 family histone deacetylase Hst4	6	V	0	1	7.62967e-05	14	0.000251462	12
hrp1	SPAC1783.05	ATP-dependent DNA helicase Hrp1	13	V	0.0113282	4	0.000625974	12	0.00540387	7
atg12	SPAC1783.06c	autophagy associated ubiquitin-like modifier Atg12	0	V			6.95634e-05	7	0	3	0	1
pap1	SPAC1783.07c	transcription factor Pap1/Caf3	95	V	0.00207643	4	0.00109157	23	0.00458752	20	0	1
rpl1502	SPAC1783.08c	60S ribosomal protein L15b	0	V	0	1	0.000327606	157	4.41649e-05	30
SPAC1786.01c	SPAC1786.01c	triacylglycerol lipase	0	V	0	1	0	1	0	1
SPAC1786.02	SPAC1786.02	phospholipase	0	V	0	1	0.000345362	3	0.00257771	3	0	1
cut11	SPAC1786.03	spindle pole body docking protein Cut11	3	E			0.000470352	39	0.00167128	37
bsu1	SPAC17A2.01	high-affinity import carrier for pyridoxine, pyridoxal, and pyridoxamine Bsu1	17	V			0	1	0	1	0	1
vma6	SPAC17A2.03c	V-type ATPase V0 subunit d	0	E			0.00016195	15	0	13	0	11
cns1	SPAC17A2.04c	HSP chaperone complex subunit Cns1	0	E			0.000503774	108	0.00070506	2
csx1	SPAC17A2.09c	RNA-binding protein Csx1	5	V	6.58695e-07	2	2.70755e-05	4	0.000347881	4
rad25	SPAC17A2.13c	14-3-3 protein Rad25	14	V	0.000699032	8	0.00113719	17	0.000356004	6	0	2
dbr1	SPAC17A5.02c	RNA lariat debranching enzyme Dbr1	4	V			4.01976e-05	7	1.01914e-05	3
rpl301	SPAC17A5.03	60S ribosomal protein L3	1	E	0	2	8.63645e-05	139	4.28087e-05	52	5.32861e-05	8
ptr8	SPAC17A5.06	transcription factor TFIIH complex ERCC-3 subunit	1	E	0	1	0.00187712	76	0.00160193	64	0.00716002	36
rec12	SPAC17A5.11	endonuclease Rec12	49	V	0.00216315	2	0.000894747	23	0.00286247	18	0.00426654	4
SPAC17A5.13	SPAC17A5.13	GTP cyclohydrolase	0	E			0.00312739	80	0.00272031	37	0	2
exo2	SPAC17A5.14	exonuclease II Exo2	2	V	0	1	0.00176007	40	2.71726e-05	9	0	6
SPAC17A5.15c	SPAC17A5.15c	glutamate-tRNA ligase	0	E	0.000466889	2	0.00171894	39	0.00219245	9	0	2
ftp105	SPAC17A5.16	Ubp5 interacting protein Ftp105	0	V	0	1	0	1	0	1	0	1
rec25	SPAC17A5.18c	meiotic recombination protein Rec25	3	V	0	1	0.000411768	10	0	2	0	1
nuc2	SPAC17C9.01c	anaphase-promoting complex subunit Apc3	23	E	0.000619143	9	0.000590291	31	0.000601128	24	0.0032108	11
tif471	SPAC17C9.03	translation initiation factor eIF4G	0	E	0.000856325	3	3.49247e-05	3	0	1
pmc3	SPAC17C9.05c	mediator complex subunit Pmc3/Med27	9	V	0.000184259	6	2.36992e-05	20	0	19	3.66e-07	7
sam50	SPAC17C9.06	mitochondrial sorting and assembly machinery complex subunit Sam50	0	E	0	2	1.12368e-06	2	0	1
alg8	SPAC17C9.07	glucosyltransferase Alg8	1	V			7.80589e-05	10	6.56157e-05	3	0.00511273	2
pnu1	SPAC17C9.08	mitochondrial endodeoxyribonuclease Pnu1	13	V			0.00204614	89	0	2
tim13	SPAC17C9.09c	TIM22 inner membrane protein import complex subunit Tim13	0	V			0.00287655	34	2.73469e-06	6	0	3
stm1	SPAC17C9.10	G-protein coupled receptor Stm1	5	V	0	1	3.70171e-06	2	1.95076e-05	2
cut8	SPAC17C9.13c	tethering factor for nuclear proteasome Cut8	10	E	2.89487e-06	5	0.000307236	14	0.00195333	14	0.0011043	4
cdc45	SPAC17D4.02	DNA replication pre-initiation complex subunit Cdc45	27	E	0.00233905	13	0.00098701	46	0.000988914	34	0.0299519	30
cis4	SPAC17D4.03c	cation diffusion family zinc membrane transporter Cis4	1	V	0	1	4.31116e-05	3	0.00070506	2
cpp1	SPAC17G6.04c	protein farnesyltransferase beta subunit Cpp1	5	V	0.00221502	4	0.000717261	13	0.00212414	8	0.000759157	2
rps2401	SPAC17G6.06	40S ribosomal protein S24	0	V	0.000767316	3	0.000133002	126	0.000195526	13	0	1
pep7	SPAC17G6.08	prevacuole/endosomal FYVE tethering component Pep7	0	V			4.43487e-06	2	0	1
sec62	SPAC17G6.09	ER protein translocation subcomplex subunit Sec62	0	E			3.51358e-05	7	0.000549948	4
ssr1	SPAC17G6.10	SWI/SNF and RSC complex subunit Ssr1	0	E	0.000167758	8	2.8271e-05	18	0.000553116	18	0.000847621	11
cul1	SPAC17G6.12	cullin 1	13	E	0.00530681	13	0.00202914	30	0.00107318	14	0.000280075	6
slt1	SPAC17G6.13	sequence orphan Slt1	0	V	0	1	1.87343e-05	2	0	1
uap56	SPAC17G6.14c	ATP-dependent RNA helicase Uap56	3	E	0.00160402	4	0	3	0	3	0	2
ysh1	SPAC17G6.16c	mRNA cleavage and polyadenylation specificity factor complex endoribonuclease subunit Ysh1	1	E	0.00385256	12	0.00124384	22	0.00167687	16	0.00136453	10
SPAC17G8.02	SPAC17G8.02	uridine ribohydrolase	0	E			3.63796e-06	3	0	1
dpb3	SPAC17G8.03c	DNA polymerase epsilon subunit Dpb3	1	E	0.00108224	2	2.76298e-05	9	4.6137e-05	4	0	1
arc5	SPAC17G8.04c	ARP2/3 actin-organizing complex subunit Arc5	0	E			7.85515e-06	10	0	6	0	6
med20	SPAC17G8.05	mediator complex subunit Med20	1	V	0	2	0	19	0	19	1.08e-07	4
SPAC17G8.06c	SPAC17G8.06c	dihydroxy-acid dehydratase	0	V			0.00358914	87	0.000916236	18	0.0010439	8
yaf9	SPAC17G8.07	YEATS family histone acetyltransferase subunit Yaf9	1	V	0	1	0.0008067	38	0.000167787	23	0.00117224	18
SPAC17G8.08c	SPAC17G8.08c	human TMEM165 homolog	0	V	0	1	0	1	0	1
shg1	SPAC17G8.09	Set1C complex subunit Shg1	0	V	0	7	0	7	0	7	0	7
dma1	SPAC17G8.10c	mitotic spindle checkpoint protein Dma1	11	V	0.00113244	4	0.000852441	16	0.000942389	11	0.000859797	4
mst2	SPAC17G8.13c	histone acetyltransferase Mst2	4	V			0.000287796	7	0.000548358	6	0	1
pck1	SPAC17G8.14c	protein kinase C	15	V	0.00809372	5	0.00122344	12	0.006471	11	8.47829e-05	3
ebp2	SPAC17H9.05	rRNA processing protein Ebp2	1	E	0.00839775	6	0.00139267	157	0.000758985	24	0	1
ras1	SPAC17H9.09c	GTPase Ras1	83	V	0.000592686	3	0.00560161	33	0.00847685	28	0.0457191	9
ddb1	SPAC17H9.10c	damaged DNA binding protein Ddb1	12	V	0.0069585	12	0.00173388	40	0.00394972	38	0.0126981	17
gmf1	SPAC17H9.11	cofilin/tropomyosin family Glia Maturation Factor homolog Gmf1	1	V	0.00108224	3	3.61596e-07	4	1.61269e-05	4	0.000276917	2
SPAC17H9.13c	SPAC17H9.13c	glutamate 5-kinase	0	V			0.000523301	52	0.000366818	20	0.000737941	5
tom22	SPAC17H9.16	mitochondrial TOM complex subunit Tom22	0	E			3.72463e-05	14	9.32511e-06	4	0	1
mdm10	SPAC17H9.17c	Mdm10/Mdm12/Mmm1 complex subunit Mdm10	1	E			0.000332099	7	1.83447e-05	3
cdt2	SPAC17H9.19c	WD repeat protein Cdt2	6	V	0.00408822	12	4.81693e-05	11	0.000104711	10	0	2
psc3	SPAC17H9.20	mitotic cohesin complex, non-SMC subunit Psc3	6	E	0	2	2.93522e-05	10	9.69979e-05	10	0.000777387	4
SPAC1805.02c	SPAC1805.02c	electron transfer flavoprotein beta subunit	0	V			0.00106929	35	2.27917e-06	4	0	2
nup132	SPAC1805.04	nucleoporin Nup132	2	V	0	1	0	33	0	33	1.14024e-05	9
cki3	SPAC1805.05	serine/threonine protein kinase Cki3	1	V			0	1	0	1
hem2	SPAC1805.06c	porphobilinogen synthase Hem2	0	V			0.00171781	68	0.000672577	10	0.0261636	5
dad2	SPAC1805.07c	DASH complex subunit Dad2	13	V	0	3	0.000851921	47	0.00182237	47	0.000181915	9
dlc1	SPAC1805.08	dynein light chain Dlc1	4	V	0.000561805	2	1.61304e-05	5	4.77376e-05	5
fmt1	SPAC1805.09c	methionyl-tRNA formyltransferase Fmt1	0	V			0.000113375	28	0.000238637	11	0	2
rps2602	SPAC1805.11c	40S ribosomal protein S26	0	V	0.00209738	4	0.000500951	136	3.42537e-06	10
uep1	SPAC1805.12c	ribosomal-ubiquitin fusion protein Ubi2	0	V	3.44051e-06	2	0.000515516	61	2.86402e-05	3	0	1
rpl14	SPAC1805.13	60S ribosomal protein L14	0	V	0.000221594	2	0.000731186	186	0.000891201	130	7.86315e-07	42
pub2	SPAC1805.15c	HECT-type ubiquitin-protein ligase Pub2	3	V	0	1	5.8314e-05	3	0	2
SPAC1805.16c	SPAC1805.16c	purine nucleoside phosphorylase	0	V			0.00151423	44	0.00658199	17	0.000925126	7
crm1	SPAC1805.17	importin family nuclear export receptor Crm1	38	E	0.00261797	4	0.007963	58	0.00349476	11	0.00154314	3
sup45	SPAC1834.01	translation release factor eRF1	3	E	0	1	0.00878117	236	0.00418708	63	0.0011913	43
aro1	SPAC1834.02	pentafunctional aromatic polypeptide Aro1	0	E	0	1	0.00112011	24	0.00231106	5	0.0017091	3
hhf1	SPAC1834.03c	histone H4 h4.1	3	V	0.00725535	11	1.63309e-06	5	0	1
alg9	SPAC1834.05	mannosyltransferase complex subunit Alg9	1	V			0.000138074	8	0.000709726	3	0.000865621	3
pmo25	SPAC1834.06c	mo25 family protein Pmo25	4	E	0.00141894	4	0.000293983	6	2.62275e-05	3	0	1
klp3	SPAC1834.07	kinesin-like protein Klp3	11	V	0	1	0	2	0	1	0	1
mak1	SPAC1834.08	histidine kinase Mak1	4	V	0	1	0	1	0	1
sec18	SPAC1834.11c	secretory pathway protein Sec18	0	E	0	1	0.00212835	20	4.99171e-06	4	0	1
slc1	SPAC1851.02	1-acylglycerol-3-phosphate O-acyltransferase Slc1	0	V			0.00243268	23	0.000188237	6	0	1
ric1	SPAC1851.04c	Ypt/Rab-specific guanyl-nucleotide exchange factor	2	V	0.00108224	2	0.00017042	6	8.71629e-05	3	0	1
SPAC186.03	SPAC186.03	L-asparaginase	0	V			1.27949e-05	17	6.42632e-05	16
SPAC186.08c	SPAC186.08c	L-lactate dehydrogenase	0	V			0.00142493	63	0.00236479	31	0.0081181	10
SPAC186.09	SPAC186.09	pyruvate decarboxylase	0	V			0.000184338	16	0.000247691	14	0	2
SPAC18B11.02c	SPAC18B11.02c	tRNA pseudouridylate synthase	0	V			2.3216e-05	15	0	1
ncs1	SPAC18B11.04	related to neuronal calcium sensor Ncs1	3	V	0	1	0.000228191	7	0.000469449	2	0	1
gpi18	SPAC18B11.05	pig-V, dolichyl-phosphate-mannose-glycolipid alpha-mannosyltransferase	0	E			0	6	0	6
rhp6	SPAC18B11.07c	Rad6 homolog, ubiquitin conjugating enzyme E2 Rhp6	18	V	0.000422142	4	0.0007828	13	0.000883543	10	2.7e-07	3
SPAC18B11.09c	SPAC18B11.09c	serine O-acetyltransferase activity	0	V			0.00149564	29	0	2
tup11	SPAC18B11.10	transcriptional corepressor Tup11	16	V	0.00143393	5	7.1127e-05	8	0.000374003	5	1.08e-06	3
chp1	SPAC18G6.02c	chromodomain protein Chp1	24	V	0.00584418	12	0.000414717	11	0.00110984	11	0.00027212	4
ypt3	SPAC18G6.03	GTPase Ypt3	14	E	0.000970717	2	0.000761863	9	0.0025878	5	0	2
shm2	SPAC18G6.04c	serine hydroxymethyltransferase Shm2	0	V	0	1	0.000820832	55	0.00191836	27	0.0201188	13
SPAC18G6.05c	SPAC18G6.05c	translation elongation regulator Gcn1	0	V	0	1	0.000974487	29	0.00140986	3
SPAC18G6.06	SPAC18G6.06	U3 snoRNP-associated protein Utp11	0	E			6.81993e-05	103	2.35586e-06	21
mra1	SPAC18G6.07c	ribosome biogenesis protein Mra1	2	E	0	1	0.0045161	223	0.0049597	65	0.000419443	19
rrn3	SPAC18G6.11c	ribosomal DNA	3	E			0.000616378	23	0.00148396	20	0.000565294	8
rps7	SPAC18G6.14c	40S ribosomal protein S7	1	E	0.000539732	4	0.00232386	259	0.00265758	156	0.000626906	60
mal3	SPAC18G6.15	EB1 family Mal3	24	V	0.00393047	10	0.00337934	41	0.00214948	21	0.00976559	9
SPAC1952.01	SPAC1952.01	Pig-U	0	E			0	2	0	1
gcn5	SPAC1952.05	SAGA complex histone acetyltransferase catalytic subunit Gcn5	16	V	0	3	0.00520535	72	0.00264978	17	0.00511543	4
rad1	SPAC1952.07	checkpoint clamp complex protein Rad1	107	V	0.000254539	6	0.00118508	37	0.00354542	35	0.00735583	9
SPAC1952.09c	SPAC1952.09c	acetyl-CoA hydrolase	0	V			3.58641e-05	14	1.75183e-05	6	0	3
ure2	SPAC1952.11c	urease Ure2	4	V			0.000924304	12	0.000753458	8	0.0017091	4
csn71	SPAC1952.12c	COP9/signalosome complex subunit 7a	0	V			0	7	0	7
ned1	SPAC1952.13	lipin Ned1	2	E	1.4851e-05	3	0.00022503	8	0.000810917	6
rec24	SPAC1952.15c	meiotic recombination protein Rec24	3	V	0.000430198	2	7.8897e-06	7	0	1
erg5	SPAC19A8.04	C-22 sterol desaturase Erg5	1	V			0.000373342	19	1.41673e-05	6
sst4	SPAC19A8.05c	sorting receptor for ubiquitinated membrane proteins, ESCRT 0 complex subunit Sst4	2	V			0.00127469	13	0.00070506	2	0	1
SPAC19A8.07c	SPAC19A8.07c	U3 snoRNP-associated protein Imp4	0	E			0.000725052	180	0.000728806	45	0	5
upf2	SPAC19A8.08	nonsense-mediated decay protein Upf2	1	V			0	2	0	2
SPAC19A8.09	SPAC19A8.09	ER to Golgi transport protein Yos1	0	E			0	2	0	1
rfp1	SPAC19A8.10	SUMO-targeted ubiquitin-protein ligase subunit Rfp1	3	V	0.00272122	5	0.00163065	14	0.0013193	11	0	1
dcp2	SPAC19A8.12	mRNA decapping complex catalytic subunit Dcp2	8	E	0.00108224	2	0.000678525	4	0.00070506	2	0	1
usp101	SPAC19A8.13	U1 snRNP-associated protein Usp101	0	E	0.0055835	17	7.33649e-05	16	0	3
trp2	SPAC19A8.15	tryptophan synthase	0	E			0.00198999	77	0.00279561	25	0.00955407	6
gas1	SPAC19B12.02c	cell wall protein Gas1, 1,3-beta-glucanosyltransferase	3	E	0	1	0	1	0	1
bgs3	SPAC19B12.03	1,3-beta-glucan synthase subunit Bgs3	1	E	0	1	0.000577614	12	0.00167665	12	0	2
rps3001	SPAC19B12.04	40S ribosomal protein S30	0	V	0.000221594	2	0.000899315	108	0	3
fcp1	SPAC19B12.05c	CTD phosphatase Fcp1	8	E	7.47091e-05	14	0.00120389	43	0.000334274	28	1.49219e-05	16
SPAC19B12.06c	SPAC19B12.06c	rhomboid family protease	0	V	0	1	0	1	0	1
atg4	SPAC19B12.08	Atg8 deconjugator Atg4	0	V			0	2	0	2
sst2	SPAC19B12.10	human AMSH/STAMBP protein homolog, ubiquitin specific-protease	4	V			0.000813653	6	0	1
SPAC19B12.11c	SPAC19B12.11c	zinc finger protein, human ZNF593 ortholog	0	V			2.79481e-05	95	1.0425e-07	11
pyp2	SPAC19D5.01	tyrosine phosphatase Pyp2	19	V	7.73456e-05	2	9.12655e-05	9	0	5	0.00013627	4
cid1	SPAC19D5.03	poly	11	V			0	2	0	2
ptr1	SPAC19D5.04	HECT-type ubiquitin ligase E3 Ptr1	2	E			5.47561e-05	5	0.00140986	3	0	1
imp3	SPAC19D5.05c	U3 snoRNP-associated protein Imp3	0	E	0	1	0.00134081	178	0.00272564	50	0.000273668	20
din1	SPAC19D5.06c	Dhp1p-interacting protein Din1	2	V			0	1	0	1	0	1
uga1	SPAC19D5.07	4-aminobutyrate aminotransferase	1	V			0.000219703	17	8.22046e-06	4	0.0017091	3
ctf8	SPAC19D5.11c	DNA replication factor C complex subunit Ctf8	2	V			0	13	0	13
nup40	SPAC19E9.01c	nucleoporin Nup40	1	V	0	1	0	33	0	33	0.000141414	8
fin1	SPAC19E9.02	serine/threonine protein kinase, NIMA related Fin1	6	V	0	1	0.000114274	10	0.000770209	10	0.00112976	2
pas1	SPAC19E9.03	cyclin Pas1	3	V	0.00108224	2	4.83039e-06	3	0	2
cut20	SPAC19G12.01c	anaphase-promoting complex subunit Apc4	5	E	0.0111631	23	0.000364982	28	0.00312685	28	0.00662453	15
pms1	SPAC19G12.02c	MutL family mismatch-repair protein Pms1	12	V			6.77639e-05	18	0.000513253	11	0.000299102	6
cda1	SPAC19G12.03	chitin deacetylase Cda1	1	V	0	2	0.000838282	12	8.00363e-05	4
SPAC19G12.04	SPAC19G12.04	ureidoglycolate hydrolase	0	V			7.52979e-05	6	3.15436e-05	4	0	1
hta2	SPAC19G12.06c	histone H2A beta	1	V	0.00266671	4	1.88224e-05	10	0	1
cpy1	SPAC19G12.10c	vacuolar carboxypeptidase Y	7	V	0.00311693	2	0.000453393	10	0	1
poz1	SPAC19G12.13c	Pot1 associated protein Poz1	3	V			5.25604e-05	3	0	2	0	2
its3	SPAC19G12.14	1-phosphatidylinositol-4-phosphate 5-kinase Its3	3	E	0.000148914	2	0.00252906	21	0.00241728	11	0.00599453	5
tpp1	SPAC19G12.15c	trehalose-6-phosphate phosphatase Tpp1	8	V	0	2	4.88049e-05	12	0.000323248	11	2.80375e-05	7
SPAC1A6.03c	SPAC1A6.03c	phospholipase	0	V			1.28297e-06	2	5.44118e-06	2	0	1
plb1	SPAC1A6.04c	phospholipase B homolog Plb1	2	V	0	1	0.000414142	5	0.00324764	5
lag1	SPAC1A6.09c	sphingosine N-acyltransferase Lag1	1	V			1.42806e-05	2	0	1
deb1	SPAC1B1.01	transcription factor Deb1/Rdp1	17	E	0.000762789	4	0.000182836	8	3.51512e-06	4	0	1
SPAC1B1.02c	SPAC1B1.02c	NAD/NADH kinase	0	V			0	2	0	2	0	2
kap95	SPAC1B1.03c	karyopherin Kap95	0	E			0.00173321	57	0.00108271	35	0.00256119	16
SPAC1B2.03c	SPAC1B2.03c	GNS1/SUR4 family protein	0	V	0.00787256	2	0.000121484	6	0	1
cox6	SPAC1B2.04	cytochrome c oxidase subunit VI	0	V			0.000259514	40	0.00228848	20	2.16e-07	7
mcm5	SPAC1B2.05	MCM complex subunit Mcm5	61	E	5.18647e-05	8	0.000376995	52	0.00026965	37	0.000974745	31
SPAC1B3.01c	SPAC1B3.01c	uracil phosphoribosyltransferase	0	V			0.00120466	51	0.00022884	5	0	3
SPAC1B3.02c	SPAC1B3.02c	transcription elongation factor, Elf1 family	0	V			0.000663641	12	0	1
wis2	SPAC1B3.03c	cyclophilin family peptidyl-prolyl cis-trans isomerase Wis2	4	V			0.000388914	7	0	1
SPAC1B3.04c	SPAC1B3.04c	mitochondrial GTPase involved in translation Guf1	0	V			0.00321728	78	0.000790186	8
not3	SPAC1B3.05	CCR4-Not complex subunit Not3/5	0	V			2.85972e-06	6	0	2
vps28	SPAC1B3.07c	ESCRT I complex subunit Vps28	0	V			0.000162633	8	0	1
rpb10	SPAC1B3.12c	DNA-directed RNA polymerase I, II, and III subunit Rpb10	15	E	1.38443e-06	7	0.0059561	174	0.0101263	112	0.00726036	45
vma3	SPAC1B3.14	V-type ATPase V0 subunit c	1	E			0	13	0	13	0.00247323	13
clr2	SPAC1B3.17	chromatin silencing protein Clr2	6	V			2.49386e-05	6	0	3	0	2
sck1	SPAC1B9.02c	serine/threonine protein kinase Sck1	9	V	0.00717789	2	0.000470266	6	0.00196784	5	0.000261892	2
SPAC1B9.03c	SPAC1B9.03c	RNA-binding protein involved in ribosomal large subunit assembly and maintenance	0	E			0.000121138	85	6.96741e-07	9
SPAC1D4.02c	SPAC1D4.02c	human GRASP protein family Golgi protein	0	V			0	1	0	1
cct2	SPAC1D4.04	chaperonin-containing T-complex beta subunit Cct2	1	E	0	1	0.000207117	23	4.63107e-05	17	5.68421e-05	13
csk1	SPAC1D4.06c	cyclin-dependent kinase activating kinase Csk1	10	V	0	1	0.000121564	12	0.000192613	9	0	2
pis1	SPAC1D4.08	CDP-diacylglycerol--inositol 3-phosphatidyltransferase Pis1	0	E			0.00114083	15	0.00315727	14	0.00492283	4
rtf2	SPAC1D4.09c	replication termination factor Rtf2	1	V			2.8849e-07	3	0	1
lkh1	SPAC1D4.11c	dual specificity protein kinase Lkh1	7	V	0	2	8.81883e-05	5	0.000139912	4
rad15	SPAC1D4.12	transcription factor TFIIH complex subunit Rad15	7	E			0.00246511	93	0.00237177	67	0.00824758	37
byr1	SPAC1D4.13	MAP kinase kinase Byr1	29	V	0.00110944	3	0.000228065	10	0.000295843	7	0.00355752	3
tho2	SPAC1D4.14	THO complex subunit Tho2	1	E			3.39233e-05	4	0.00026635	4
SPAC1F12.02c	SPAC1F12.02c	translationally controlled tumor protein homolog	0	V			0.000567254	156	8.91248e-06	16
SPAC1F12.07	SPAC1F12.07	phosphoserine aminotransferase	0	V	0.000774926	2	0.00322732	53	0.00354027	8	0.00108226	3
rrp6	SPAC1F3.01	exosome 3'-5' exoribonuclease subunit Rrp6	3	E	5.77276e-05	2	0.00218471	123	0.00229486	17	0.000872665	4
mkh1	SPAC1F3.02c	MEK kinase	6	V	0.000943233	4	0.000508539	13	0.000545308	11	0	2
spo15	SPAC1F3.06c	sporulation protein Spo15	10	V	0.000517114	2	8.17737e-05	9	1.4503e-05	2
rsc58	SPAC1F3.07c	RSC complex subunit Rsc58	0	V	0	4	0	12	0	12	0	6
oct1	SPAC1F3.10c	mitochondrial intermediate peptidase Oct1	2	V			4.71489e-05	3	0	1
cdc12	SPAC1F5.04c	formin Cdc12	37	E	0.000628372	4	5.09666e-05	11	2.25892e-05	6	0.000572624	3
hem14	SPAC1F5.07c	protoporphyrinogen oxidase	0	V			1.61468e-06	7	8.60008e-06	4	4.14e-06	2
yam8	SPAC1F5.08c	calcium channel regulatory subunit Yam8	6	V			2.3663e-06	2	0	1
shk2	SPAC1F5.09c	PAK-related kinase Shk2	4	V	0.000886074	4	0.000100513	9	0.000231846	8	0	2
tra2	SPAC1F5.11c	phosphatidylinositol kinase-related protein Tra2	2	E	0.00724369	11	0.000537879	27	0	12	0	7
spt6	SPAC1F7.01c	transcription elongation factor Spt6	3	V			0.000184316	16	0.000144918	7
pkd2	SPAC1F7.03	TRP-like ion channel Pkd2	3	E	0.00137981	4	0.000600163	4	0.00093359	4
rho1	SPAC1F7.04	Rho family GTPase Rho1	47	V	0.012109	10	0.0029237	23	0.00987793	21	0.00626981	13
cdc22	SPAC1F7.05	ribonucleoside reductase large subunit Cdc22	27	E	0.00458698	6	0.00827734	81	0.0113943	25	0.0558585	10
fip1	SPAC1F7.07c	iron permease Fip1	5	V	0	1	0.000836673	6	0.00211362	3
fio1	SPAC1F7.08	iron transport multicopper oxidase Fio1	4	V			0.000147129	6	0.00070506	3
SPAC1F7.09c	SPAC1F7.09c	allantoicase	0	V			0.000197551	10	3.15436e-05	4	0	1
rpl801	SPAC1F7.13c	60S ribosomal protein L8	0	V	0.000271298	3	0.000101693	140	1.38282e-05	43	0	3
ght3	SPAC1F8.01	hexose transporter Ght3	1	V			0	1	0	1
SPAC1F8.04c	SPAC1F8.04c	hydrolase	0	V			0.00090058	40	0.00183954	9
SPAC1F8.07c	SPAC1F8.07c	pyruvate decarboxylase	0	E	0.000902576	4	0.00102408	20	0.00146489	15	0	2
caf16	SPAC20G4.01	CCR4-Not complex subunit Caf16	0	V			0.000376892	23	0.000387693	3	0	2
fus1	SPAC20G4.02c	formin Fus1	11	V			0.00117683	4	0	1
hri1	SPAC20G4.03c	eIF2 alpha kinase Hri1	2	V	0.00108224	2	0	2	0.00070506	2
hus1	SPAC20G4.04c	checkpoint clamp complex protein Hus1	81	V	0.00125369	6	0.00073763	20	0.00021115	17	0.00014393	6
SPAC20G4.05c	SPAC20G4.05c	UPF0061 family protein	0	V			0.000226566	14	0	1
adf1	SPAC20G4.06c	actin depolymerizing factor, cofilin	5	E	0.000860029	2	0.000808111	24	0.00154054	12	0.00113492	6
sts1	SPAC20G4.07c	C-24	6	V			0.00109711	23	0.000244701	5
cdc17	SPAC20G8.01	ATP-dependent DNA ligase Cdc17	16	E	0.000292259	2	0.000379542	39	0.000144139	13	0.000271926	4
itr2	SPAC20G8.03	MFS myo-inositol transporter	1	E	0	1	0	2	0	2
SPAC20G8.04c	SPAC20G8.04c	mitochondrial electron transfer flavoprotein-ubiquinone oxidoreductase	0	V	0	1	0.000130158	11	0.00138846	3	0	2
cdc15	SPAC20G8.05c	extended Fer/CIP4	44	E	0.00409909	12	0.00063047	23	0.000983719	14	0.000720687	3
erg2	SPAC20G8.07c	C-8 sterol isomerase Erg2	1	V			0.00144663	30	0.000314768	10	5.40001e-07	2
SPAC20G8.09c	SPAC20G8.09c	ribosome biogenesis ATPase	0	V			0.00145116	226	0.0010321	67	0.000158322	19
atg6	SPAC20G8.10c	beclin family protein, involved in autophagy	0	V			6.91109e-05	5	0	1
dsc3	SPAC20H4.02	conserved fungal protein	0	V	0.0026393	3	6.79487e-05	2	0	1
tfs1	SPAC20H4.03c	transcription elongation factor TFIIS	2	V			0.00229429	73	7.84257e-05	32	0.00021422	19
SPAC20H4.05c	SPAC20H4.05c	5'-methylthioribulose-1-phosphate dehydratase, adducin	0	V			1.61676e-06	6	0.000149902	4	0	2
rhp57	SPAC20H4.07	RecA family ATPase Rhp57	17	V	0.00432104	3	0.000622461	17	0.000747358	12	0.000595599	5
ufd2	SPAC20H4.10	ubiquitin-protein ligase E4	2	V	4.61087e-06	3	0.000391633	16	5.47139e-05	4	0	2
rho5	SPAC20H4.11c	Rho family GTPase Rho5	3	V	1.66016e-05	2	4.74725e-05	13	4.37566e-05	13	0.00220299	9
pcr1	SPAC21E11.03c	transcription factor Pcr1	49	V	0	2	0.000530643	15	0.000541858	9	0	2
tif224	SPAC21E11.06	translation initiation factor eIF2B delta subunit	0	V			1.06723e-05	18	0	7	0	7
lcb2	SPAC21E11.08	serine palmitoyltransferase Lcb2	1	E			0.000733867	19	0.00112479	7
tim10	SPAC222.03c	Tim9-Tim10 complex subunit Tim10	0	E			0.00270062	57	0.000369858	7	1.08e-06	5
ies6	SPAC222.04c	Ino80 complex subunit Ies6	1	V	0	1	4.66166e-05	13	0	12	0.000184822	9
mss1	SPAC222.05c	mitochondrial GTPase	2	V			0.00190282	45	0.00117244	6	0	2
mak16	SPAC222.06	nuclear HMG-like acidic protein Mak16	0	E	0	2	0.00173369	143	0.000467565	21
hri2	SPAC222.07c	eIF2 alpha kinase Hri2	4	V	0	1	0	1	0	1
SPAC222.08c	SPAC222.08c	glutamine aminotransferease subunit	0	V	0	1	0.00118212	35	0.00482177	6	1.8e-07	4
seb1	SPAC222.09	RNA-binding protein Seb1	1	E	0	1	1.57469e-06	3	5.16545e-05	2
byr4	SPAC222.10c	two-component GAP Byr4	15	E	0.00120893	6	0.00012376	12	0.000332566	11	3.48284e-05	5
hem13	SPAC222.11	coproporphyrinogen III oxidase	0	E			0.000777874	38	0.000538667	7	0.000835762	4
atp2	SPAC222.12c	F1-ATPase beta subunit Atp2	4	V	0.000466889	2	0.00489467	103	0.00927301	35	8.55001e-07	6
SPAC222.13c	SPAC222.13c	6-phosphofructo-2-kinase	0	V			4.29213e-07	8	2.97735e-06	8	2.61e-06	6
SPAC222.14c	SPAC222.14c	GTP binding protein Sey1	0	V	0	1	1.42713e-05	3	0	1
meu13	SPAC222.15	Tat binding protein 1	9	V	0	1	0.000498937	18	0.000117767	7	0.0017091	3
SPAC227.05	SPAC227.05	prefoldin subunit 4	0	V			0.00120429	36	5.8865e-05	17	0.000350144	12
SPAC227.06	SPAC227.06	Rab GTPase binding	0	V	0	1	0.000212177	4	0	1
pab1	SPAC227.07c	protein phosphatase regulatory subunit Pab1	5	V	1.6008e-05	3	0.00353867	40	0.000930174	11	0.00135123	3
yth1	SPAC227.08c	mRNA cleavage and polyadenylation specificity factor complex Yth1	1	E	0	2	0.000114038	15	3.2095e-05	12	0.000510516	8
SPAC227.09	SPAC227.09	folylpolyglutamate synthase	0	E			0.000391798	44	0.000681788	9	0	1
SPAC227.10	SPAC227.10	prefoldin subunit 2	0	V			0.00331424	46	0.000226693	18	0.00044929	16
SPAC227.12	SPAC227.12	U4/U6 x U5 tri-snRNP complex subunit Prp4 family	0	E	0	2	0.000469902	35	0	2	0	1
isu1	SPAC227.13c	mitochondrial iron-sulfur cluster assembly scaffold protein Isu1	3	V			0.00206875	38	0.00313613	10	3.78e-06	4
psf3	SPAC227.16c	GINS complex subunit Psf3	3	E	0.00263455	6	4.82733e-06	8	0	3	0	2
SPAC227.17c	SPAC227.17c	conserved protein	0	V	0	1	0	1	0	1
lys3	SPAC227.18	saccharopine dehydrogenase Lys3	3	V	3.27853e-05	3	0.000283635	32	0.000468811	6	0	1
pso2	SPAC22A12.01c	DNA 5' exonuclease	4	V	0	1	8.31873e-06	3	0	1
csn4	SPAC22A12.03c	COP9/signalosome complex subunit Csn4	1	V	2.25812e-05	3	1.9519e-05	11	4.57005e-05	9	0	3
rps2201	SPAC22A12.04c	40S ribosomal protein S15a	0	V	0	2	0.000140116	158	0.000280242	71	1.28019e-05	12
rpc11	SPAC22A12.05	DNA-directed RNA polymerase III complex subunit Rpc11	5	E	0	1	0.000562718	46	0.000845705	16	0	4
ogm1	SPAC22A12.07c	protein O-mannosyltransferase Ogm1	2	V	0	1	0.00117333	3	0	2	0	2
sap114	SPAC22A12.09c	splicing factor Sap114	0	E	3.74923e-05	8	0	4	0	4	0	4
SPAC22A12.10	SPAC22A12.10	diacylglycerol cholinephosphotranferase/ diacylglycerol ethanolaminesphotranferase	0	V			0.000587211	8	0.000705217	8	0.00102811	3
dak1	SPAC22A12.11	dihydroxyacetone kinase Dak1	2	V	0	1	0.000410029	10	0.00222508	9	0.00042714	2
SPAC22A12.12c	SPAC22A12.12c	exosome subunit Rrp40	0	E			0.000290472	44	1.73647e-05	9	0	8
mug84	SPAC22A12.13	pig-P subunit	0	E			0.000610552	9	2.46468e-05	7	0	3
bip1	SPAC22A12.15c	ER heat shock protein BiP	11	E	0.00216315	2	0.000589136	18	0.00178547	5	1.242e-05	2
SPAC22A12.16	SPAC22A12.16	ATP-citrate synthase subunit 2	0	V	0	1	5.80246e-05	21	0.000428235	21	0	2
ccs1	SPAC22E12.04	superoxide dismutase copper chaperone Ccs1	3	V			1.98466e-05	6	0	1
rer1	SPAC22E12.05c	Rer1 family protein	1	V			0.00145275	18	0.000166299	2
gmh3	SPAC22E12.06c	alpha-1,2-galactosyltransferase Gmh3	2	V			0	1	0	1
rna1	SPAC22E12.07	Ran GAP Rna1	19	E	0.00184159	9	0.00232727	31	0.000450709	10	0.00144896	3
rrn10	SPAC22E12.08	RNA polymerase I upstream activation factor complex subunit Rrn10	1	E	6.58695e-07	2	0	3	0	3	0	2
krp1	SPAC22E12.09c	kexin	13	E	0	1	0.00348849	16	0.00216781	5	0	1
etp1	SPAC22E12.10c	mitochondrial type I [2Fe-2S] ferredoxin Etp1/ cytochrome oxidase cofactor Cox15, fusion	6	E	0	2	0.000119403	24	0	12	0	1
set3	SPAC22E12.11c	histone lysine methyltransferase Set3	2	V			0	14	0	14	0.00170856	2
rlp24	SPAC22E12.13c	ribosomal L24-like protein involved in ribosome biogenesis Rlp24	1	E	0	1	0.00135659	176	0.000478472	14	0	1
sck2	SPAC22E12.14c	serine/threonine protein kinase Sck2	6	V			2.76648e-06	3	1.2032e-05	3
pik1	SPAC22E12.16c	1-phosphatidylinositol 4-kinase Pik1	3	V	1.75734e-06	2	0.000820773	18	0.000559826	7	0.00118457	3
glo3	SPAC22E12.17c	ARF GTPase activating protein	0	E			0.00103451	18	0	1
SPAC22E12.18	SPAC22E12.18	conserved fungal protein	0	V	0	1	0	1	0	1
snt1	SPAC22E12.19	Set3 complex subunit Snt1	1	V			0.000281154	18	0	14	0	1
atf31	SPAC22F3.02	transcription factor Atf31	2	V			5.3199e-06	3	0	1
rdh54	SPAC22F3.03c	ATP-dependent DNA helicase Rdh54	4	V	0.000688925	3	2.35209e-05	6	2.44667e-06	3	0.000129691	2
alp41	SPAC22F3.05c	ADP-ribosylation factor Alp41	1	E			0	1	0	1
lon1	SPAC22F3.06c	Lon protease homolog Lon1	1	V			0.00238165	57	0.000775407	8
rok1	SPAC22F3.08c	ATP-dependent RNA helicase Rok1	0	V	0	1	1.111e-05	4	0	1
res2	SPAC22F3.09c	MBF transcription factor complex subunit Res2	31	V	0.00651363	10	0.000184442	14	0.000514892	14	0.00303391	8
gcs1	SPAC22F3.10c	glutamate-cysteine ligase Gcs1	3	V			0.000334664	28	0.000160862	18	5.40001e-07	4
tsc1	SPAC22F3.13	hamartin	12	V	0.00108224	2	0.000295069	9	0.000845947	9	0	2
SPAC22F8.04	SPAC22F8.04	triose phosphate transporter	0	V	0	1	0	1	0	1
SPAC22F8.05	SPAC22F8.05	alpha,alpha-trehalose-phosphate synthase	0	V			2.69519e-05	9	0.000142971	8	1.70217e-05	4
pam1	SPAC22F8.06	20S proteasome component beta 6	0	E	0	2	0.000288147	36	8.81537e-05	20	1.76914e-06	12
rtf1	SPAC22F8.07c	replication termination factor Rtf1	1	V	0	2	0	16	0	16
sec24	SPAC22F8.08	COPII cargo receptor Sec24/Sfb2 subunit	2	E			1.94388e-05	8	0.000145297	7	1.35e-07	5
rrp16	SPAC22F8.09	rRNA processing protein Rrp16	0	V	0	1	5.74105e-06	84	3.3928e-06	5
sap145	SPAC22F8.10c	U2 snRNP-associated protein Sap145	1	E	3.74923e-05	8	7.78693e-05	42	0.00031653	38	0.000203089	21
plc1	SPAC22F8.11	phosphoinositide phospholipase C Plc1	5	V	0	2	0.000781012	14	0.00431226	10	0.00253035	4
shf1	SPAC22F8.12c	small histone ubiquitination factor Shf1	1	V	0.000150448	3	0	3	0	3	2.7e-07	3
kap111	SPAC22G7.02	karyopherin Kap111	0	V			0	33	0	33
SPAC22G7.05	SPAC22G7.05	krr family protein	0	V	0	1	1.15499e-05	79	0	2
ura1	SPAC22G7.06c	carbamoyl-phosphate synthase	6	V	0	1	0.000118536	26	0.000528882	25	0.0016315	9
nup45	SPAC22G7.09c	nucleoporin Nup45	0	E			5.72783e-05	36	0	33	0.000125781	11
SPAC22G7.10	SPAC22G7.10	mRNA cleavage and polyadenylation specificity factor complex subunit, Fip1 homolog	0	E	0	2	0	11	0	11	0	5
kap114	SPAC22H10.03c	karyopherin Kap14	0	V			0	33	0	33	0	1
SPAC22H10.05c	SPAC22H10.05c	mRNA cleavage and polyadenylation specificity factor complex subunit	0	E			1.19481e-05	3	0	1
scd2	SPAC22H10.07	scaffold protein Scd2	9	V	0.00129041	7	0.00134833	20	0.000256119	7	0	4
SPAC22H10.09	SPAC22H10.09	sequence orphan	0	V	0	1	0	1	0	1
alp21	SPAC22H10.10	tubulin specific chaperone cofactor E	4	E	0.000173359	3	2.44795e-05	6	6.91974e-05	6	0	3
gdi1	SPAC22H10.12c	GDP dissociation inhibitor Gdi1	2	E	0.00109352	3	0.00275314	27	0.00133581	11	0.0194109	9
tfg3	SPAC22H12.02	transcription factor TFIIF complex subunit Tfg3	3	V	0.0108385	14	0.00342046	58	0.0106028	40	0.0189863	24
rps102	SPAC22H12.04c	40S ribosomal protein S3a	0	V	0.000539732	4	0.000203046	152	9.04125e-06	36	0	1
apt1	SPAC23A1.03	adenine phosphoribosyltransferase	2	V			0.00455611	128	0.00798769	25	0.00865585	10
cmk2	SPAC23A1.06c	MAPK-activated protein kinase Cmk2	3	V	0	2	0.000108537	8	8.34377e-05	7	2.14031e-05	3
rpl3401	SPAC23A1.08c	60S ribosomal protein L34	0	E	0.000271298	3	0.000115471	147	8.51321e-06	17
SPAC23A1.09	SPAC23A1.09	RNA-binding protein	0	V			5.78545e-05	13	0.00070506	2	0	1
tef102	SPAC23A1.10	translation elongation factor EF-1 alpha Ef1a-b	0	V	0.00237763	3	5.70743e-05	22	0.000455602	4	0	1
rpl1602	SPAC23A1.11	60S ribosomal protein L13/L16	0	V	0.000221594	2	0.000120168	139	0.000177865	26
frs1	SPAC23A1.12c	phenylalanine-tRNA ligase beta subunit Frs1	0	E			0.00109444	106	0.000164324	7	0.000854821	2
SPAC23A1.14c	SPAC23A1.14c	uncharacterised trans-sulfuration enzyme	0	V			4.26664e-05	14	0.000603632	13	0.000773431	8
rps23	SPAC23C11.02c	40S ribosomal protein S23	0	V			0.000226303	151	4.25909e-07	14	0	1
SPAC23C11.03	SPAC23C11.03	U3 snoRNP-associated protein Mpp1	0	E			8.77921e-05	146	0.000136214	39	2.4e-07	11
SPAC23C11.05	SPAC23C11.05	inorganic pyrophosphatase	0	E			0.000546933	28	0.000582051	27	0.000255439	9
php3	SPAC23C11.08	CCAAT-binding factor complex subunit Php3	2	V			0.000558725	14	0	2	0	1
ala1	SPAC23C11.09	mitochondrial and cytoplasmic alanine-tRNA ligase Ala1	26	E	1.33248e-05	2	0.00505671	122	0.00126578	15
cka1	SPAC23C11.11	serine/threonine protein kinase Cka1	6	E	0.00485369	3	0.00139908	23	0.00371977	15	0.000434783	8
hcn1	SPAC23C11.12	anaphase-promoting complex subunit Hcn1	6	E	0.00224477	5	0	12	0	12	0	3
pst2	SPAC23C11.15	Clr6 histone deacetylase complex subunit Pst2	2	V	0	3	0.00892291	49	0	15	0.00010923	6
plo1	SPAC23C11.16	Polo kinase Plo1	40	E	0.0129186	14	0.00423236	29	0.00675688	26	0.0070857	13
crn1	SPAC23C4.02	actin binding protein, coronin Crn1	1	V			0.00223314	35	2.07572e-05	5
rho3	SPAC23C4.08	Rho family GTPase Rho3	8	V	0.00321021	7	1.11238e-05	4	2.59469e-05	4	0	1
SPAC23C4.09c	SPAC23C4.09c	DNA-binding TFAR19-related protein	0	V			0.000328342	28	1.1474e-07	7
atp18	SPAC23C4.11	F0-ATPase subunit J	1	V			1.35225e-06	12	0	7
hhp2	SPAC23C4.12	serine/threonine protein kinase Hhp2	6	V			2.66943e-05	3	2.08666e-05	3	0	1
bet1	SPAC23C4.13	SNARE Bet1	0	E			0.000221428	18	0	4	0	3
alg1	SPAC23C4.14	mannosyltransferase complex subunit Alg1	1	E			0.00150249	21	0.0026197	14	0.00507016	6
rpb5	SPAC23C4.15	DNA-directed RNA polymerase I, II and III subunit Rpb5	12	E	0.000741429	12	0.00984104	277	0.0138379	119	0.0183109	65
rad4	SPAC23C4.18c	BRCT domain protein Rad4	62	E	0.0148913	18	0.00142292	26	0.00253642	21	0.000103929	3
spt5	SPAC23C4.19	transcription elongation factor Spt5	8	E	0.00124513	4	0.0011462	59	0.000495763	34	0.00200189	22
rfc2	SPAC23D3.02	DNA replication factor C complex subunit Rfc2	7	E	1.64188e-05	2	0.000250512	36	0.000185442	27	0.000401639	20
gpd2	SPAC23D3.04c	glycerol-3-phosphate dehydrogenase Gpd2	2	V			0.000188245	14	0.000223654	6	0	2
nup146	SPAC23D3.06c	nucleoporin Nup146	0	E			0	33	0	33
pup1	SPAC23D3.07	20S proteasome component beta 2	0	E	0	2	1.69662e-05	33	9.24935e-05	21	0	8
arp42	SPAC23D3.09	SWI/SNF and RSC complex subunit Arp42	2	V	0.000167758	8	2.8271e-05	18	0.000553116	18	0.00254714	18
ayr1	SPAC23D3.11	1-acyldihydroxyacetone phosphate reductase	0	V			0	3	0	3	0	1
SPAC23D3.12	SPAC23D3.12	inorganic phosphate transporter	0	V	0	1	0	1	0	1
aah2	SPAC23D3.14c	alpha-amylase homolog Aah2	0	V			0	1	0	1
fep1	SPAC23E2.01	iron-sensing transcription factor Fep1	16	V	0.000183269	4	0.000371944	10	2.33912e-05	2	0	1
lsd2	SPAC23E2.02	histone demethylase SWIRM2	1	E	4.46252e-05	5	9.76099e-05	7	2.41676e-05	5	2.7e-07	3
ste7	SPAC23E2.03c	meiotic suppressor protein Ste7	25	V	0	2	0.000487486	9	0	2	0	1
rpb2	SPAC23G3.01	RNA polymerase II complex subunit Rpb2	27	E	0.000455501	13	0.00123611	109	0.00209688	85	0.00917961	48
sib2	SPAC23G3.03	ornithine N5 monooxygenase	2	V			0.000625489	6	0	1	0	1
ies4	SPAC23G3.04	Ino80 complex subunit Ies4	0	V			0	12	0	12
SPAC23G3.06	SPAC23G3.06	U3 snoRNP protein Nop58	0	E	0.000221594	3	0.00120781	183	0.00112196	39	0	3
snf30	SPAC23G3.07c	SWI/SNF complex subunit Snf30	0	V	0.000930575	13	0	11	0	11	0.00042377	11
ssr3	SPAC23G3.10c	SWI/SNF and RSC complex subunit Ssr3	0	V	0.000167758	8	0.000622209	22	0.000553116	18	1.44e-06	10
rpn6	SPAC23G3.11	19S proteasome regulatory subunit Rpn6	0	E	0.00574394	5	0.00096897	44	0.000342283	20	9.00001e-08	6
ini1	SPAC23H3.02c	RING finger-like protein Ini1	1	E	0	3	0.000356093	38	0.000416469	11	0	3
swd1	SPAC23H3.05c	Set1C complex subunit Swd1	0	V	0	9	0.00200442	21	0	7	0	7
mrp2	SPAC23H3.07c	mitochondrial ribosomal protein subunit S14	0	E			0.000549232	67	2.94133e-05	38	0.000311669	16
bub3	SPAC23H3.08c	mitotic spindle checkpoint protein Bub3	11	V	0	2	0.00125449	62	0.000820549	58	0.000329625	13
gly1	SPAC23H3.09c	threonine aldolase Gly1	1	V			0.000729858	26	2.13839e-05	6	0.00230993	6
ssr2	SPAC23H3.10	SWI/SNF and RSC complex subunit Ssr2	0	E	0.000167758	8	0.000646146	21	0.000553116	18	0.000847621	11
gpa2	SPAC23H3.13c	heterotrimeric G protein alpha-2 subunit Gpa2	19	V	0.00128858	3	0.000791233	16	0.00201817	11	0.00372538	5
ppk9	SPAC23H4.02	serine/threonine protein kinase Ppk9	3	V	0	1	0.000137593	7	4.75711e-05	6	0	4
erv25	SPAC23H4.03c	COPII-coated vesicle component Erv25	0	E			0.0015641	16	0.00070506	2
SPAC23H4.04	SPAC23H4.04	mitochondrialtRNA	0	E			0.00136829	48	0.00201296	7	0	2
gln1	SPAC23H4.06	glutamate-ammonia ligase Gln1	3	E			0.00161034	39	0.000588131	23	0.00542469	10
srp102	SPAC23H4.07c	signal recognition particle receptor beta subunit Srp102	0	E			6.079e-06	47	0	46	3.63299e-06	4
thi4	SPAC23H4.10c	thiamine-phosphate dipyrophosphorylase/hydroxyethylthiazole kinase	4	V			0.00067898	12	7.82821e-07	3
cnl2	SPAC23H4.11c	centromere localized protein Cnl2	1	E	0	2	0	12	0	12
alp13	SPAC23H4.12	MRG family Clr6 histone deacetylase complex subunit Alp13	3	V	0	3	0.00566464	64	0.00607929	35	0.0107706	15
SPAC23H4.15	SPAC23H4.15	ribosome biogenesis protein Tsr1	0	E			0.00109748	206	0.000617014	64	0.000351155	5
srb10	SPAC23H4.17c	cyclin-dependent protein Srb mediator subunit kinase Srb10	16	V	0	2	4.93124e-05	20	0	19	0.000494313	9
rbx1	SPAC23H4.18c	RING-box protein 1	5	E	0.00468597	10	0.000765188	19	0.00188778	13	0.00174305	5
sty1	SPAC24B11.06c	MAP kinase Sty1	159	V	0.0211331	16	0.00455364	35	0.0173233	33	0.0176237	11
sid2	SPAC24B11.11c	NDR kinase Sid2	26	E	0.000508871	7	0.00062279	23	0.00151666	19	0.000570487	6
SPAC24B11.12c	SPAC24B11.12c	P-type ATPase	0	V	0	1	0.000354624	3	0	1
hem3	SPAC24B11.13	hydroxymethylbilane synthase	0	V			0.00170652	49	0.000680927	11	0.011314	6
SPAC24C9.02c	SPAC24C9.02c	cytochrome c1 heme lyase	0	V			5.50106e-05	8	2.09808e-05	3	0	1
mvd1	SPAC24C9.03	diphosphomevalonate decarboxylase	0	E			0.000640147	23	0.00051799	7	0.00285367	6
SPAC24C9.06c	SPAC24C9.06c	aconitate hydratase	0	E	0	1	0.00032707	33	0.00065687	9	0.000925202	6
bgs2	SPAC24C9.07c	1,3-beta-glucan synthase subunit Bgs2	3	V			0.000106626	12	1.4734e-05	11	0	2
mrp4	SPAC24C9.10c	mitochondrial ribosomal protein subunit S2	0	E			0.00193312	90	0.00144625	28	0.000108268	11
SPAC24C9.12c	SPAC24C9.12c	glycine hydroxymethyltransferase	0	V	0.00115938	2	0.00147379	54	0.0109581	26	0.0201188	13
otu1	SPAC24C9.14	ubiquitin-specific cysteine protease, OTU family, Otu1	0	V	0	1	1.24963e-05	5	0	1	0	1
spn5	SPAC24C9.15c	septin Spn5	2	V	0.00108224	3	7.81644e-06	4	0.0003524	4
cox8	SPAC24C9.16c	cytochrome c oxidase subunit VIII	0	V			0	12	0	12
SPAC24H6.02c	SPAC24H6.02c	TIM23 translocase complex subunit Tim15	0	V			1.6998e-05	3	0	2	0	1
cul3	SPAC24H6.03	cullin 3	5	V	0.00334219	11	0.000318246	17	0.000607163	12	0.00269379	6
hxk1	SPAC24H6.04	hexokinase 1	4	V	0.00196688	2	0.000367875	22	0.00110587	20	0.000931455	11
cdc25	SPAC24H6.05	M phase inducer phosphatase Cdc25	257	E	0.00259354	7	0.00834016	61	0.0252347	61	0.0469989	28
sld3	SPAC24H6.06	DNA replication pre-initiation complex subunit Sld3	7	E	8.12447e-05	5	1.50535e-06	8	0	2	0	1
rps901	SPAC24H6.07	40S ribosomal protein S9	0	V	0.000221594	2	0.000174161	138	0.000299264	19
gef1	SPAC24H6.09	RhoGEF Gef1	4	V	0	2	4.2247e-05	5	3.67906e-05	5	0	1
SPAC24H6.10c	SPAC24H6.10c	phospho-2-dehydro-3-deoxyheptonate aldolase	0	V	0	1	4.93404e-07	8	0	1	0	1
uba3	SPAC24H6.12c	NEDD8 activating enzyme	1	E	0	2	0.000827458	17	0.00127227	5	0.000854821	3
fft3	SPAC25A8.01c	fun thirty related protein Fft3	3	V	0	1	1.15349e-06	3	0	2
dap1	SPAC25B8.01	cytochrome P450 regulator Dap1	3	V			7.35513e-06	2	0	1
sds3	SPAC25B8.02	Clr6 histone deacetylase complex subunit Sds3	0	E			1.4645e-05	19	1.65877e-05	19	7.56001e-07	5
psd2	SPAC25B8.03	phosphatidylserine decarboxylase Psd2	1	V			0	5	0	5	0.00155486	2
SPAC25B8.05	SPAC25B8.05	tRNA-pseudouridine synthase	0	V			0.00047189	39	1.56564e-07	4
mal2	SPAC25B8.14	kinetochore protein, CENP-O ortholog Mal2	10	E	0.000335425	10	0.000168136	28	0.000152637	26	0.00014859	10
SPAC25B8.15c	SPAC25B8.15c	wybutosine biosynthesis protein Tyw3	0	V			8.56554e-05	5	0	1
zip1	SPAC25G10.03	transcription factor Zip1	5	V	0	1	3.3117e-05	5	2.22607e-05	2
rec10	SPAC25G10.04c	meiotic recombination protein Rec10	17	V	0.0127067	12	0.00132212	21	0.0039702	13	3.24e-06	4
his1	SPAC25G10.05c	ATP phosphoribosyltransferase	2	V			0.000820683	66	0.000322095	14	0.00481358	5
rps2801	SPAC25G10.06	40S ribosomal protein S28	0	V	0	1	0.000143804	120	0.000270337	11
cut7	SPAC25G10.07c	kinesin-like protein Cut7	12	E	1.37727e-06	3	0.000616217	21	0.000747153	15	0.00056123	2
SPAC25G10.08	SPAC25G10.08	translation initiation factor eIF3b	0	E	5.52672e-05	3	0.00221237	171	0.000460744	45	0.000107334	34
pcf3	SPAC25H1.06	CAF assembly factor	0	V	0.00108224	3	0	2	0	2	0	2
myh1	SPAC26A3.02	adenine DNA glycosylase Myh1	10	V	0.00147088	5	0.000293659	16	2.7271e-05	6	4.23823e-05	3
rmi1	SPAC26A3.03c	RecQ mediated genome instability protein Rmi1	0	E			0	2	0	2
rpl2002	SPAC26A3.04	60S ribosomal protein L20	0	V	5.39543e-05	3	5.52822e-05	144	1.07182e-07	19
chc1	SPAC26A3.05	clathrin heavy chain Chc1	2	E	0	1	0.0099921	43	0.00168917	12	3.78e-06	5
SPAC26A3.06	SPAC26A3.06	rRNA	0	V			0.000236391	59	0	4
rpl1101	SPAC26A3.07c	60S ribosomal protein L11	0	V	5.39543e-05	3	0.000401003	180	0.000249258	85	0.000280298	35
smb1	SPAC26A3.08	Sm snRNP core protein Smb1	1	V	0.00464119	10	0.00216762	73	0.00383891	40	0.00194698	30
rga2	SPAC26A3.09c	Rho-type GTPase activating protein Rga2	1	V	0.00673245	3	0.000557536	9	0.00187718	9	0.00149509	3
dhp1	SPAC26A3.12c	5'-3' exoribonuclease Dhp1	5	E			0.000783954	16	0	1	0	1
nsp1	SPAC26A3.15c	nucleoporin Nsp1	0	E			4.07552e-05	35	0	33	2.14799e-06	10
dph1	SPAC26A3.16	UBA domain protein Dph1	5	V	0.00174522	5	0.00046428	19	0.000584499	7	6.55714e-05	4
SPAC26A3.17c	SPAC26A3.17c	N-methyltransferase	0	V			0.000713229	120	0.000154568	7
pda1	SPAC26F1.03	pyruvate dehydrogenase e1 component alpha subunit Pda1	0	E	0	1	0.00135923	52	0.00116603	28	0.00286673	9
gpm1	SPAC26F1.06	monomeric 2,3-bisphosphoglycerate	0	E	0.000969261	2	0.0012513	43	0.000147108	9	1.7076e-05	4
pyp1	SPAC26F1.10c	tyrosine phosphatase Pyp1	23	V	7.73456e-05	2	0.000406085	16	0.00108369	13	0.00188805	5
SPAC26F1.12c	SPAC26F1.12c	conserved eukaryotic protein	0	V			0.0010859	136	0	1
lrs1	SPAC26F1.13c	cytoplasmic leucine-tRNA ligase Lrs1	0	E			0.000692187	77	5.28399e-05	7	0	1
SPAC26H5.02c	SPAC26H5.02c	DNA replication ATPase	0	V			0.00603459	69	0.00266312	8
pcf2	SPAC26H5.03	CAF assembly factor	1	V	0.00158136	3	0.00180118	18	0.00292045	9	0.00170856	4
SPAC26H5.05	SPAC26H5.05	IPT/TIG ankyrin repeat containing transcription regulator of fatty acid biosynthesis	0	V	0	1	0.00145015	15	0	1
pot1	SPAC26H5.06	telomere end-binding protein Pot1	34	E	0	4	0.000245343	9	0.00111492	9	0.00281066	3
SPAC26H5.07c	SPAC26H5.07c	seven transmembrane receptor protein	0	V	0	1	0	1	0	1
bgl2	SPAC26H5.08c	glucan beta-glucosidase Bgl2	0	V			0.000168117	10	0.000601009	10	0	1
tif51	SPAC26H5.10c	translation elongation factor eIF5A	1	V	0.00328644	4	0.000116891	6	0	1
kei1	SPAC26H5.13c	inositol phoshorylceramide synthase regulatory subunit Kei1	0	E	0	1	0	1	0	1
mei2	SPAC27D7.03c	RNA-binding protein involved in meiosis Mei2	54	V	0.00218534	5	0.000169112	10	0.000403133	9	0.00157845	4
omt2	SPAC27D7.04	4-alpha-hydroxytetrahydrobiopterin dehydratase	1	V			6.45758e-05	10	0	1
apc14	SPAC27D7.05c	anaphase-promoting complex subunit Apc14	1	V	0	5	0	12	0	12	0	4
SPAC27D7.06	SPAC27D7.06	electron transfer flavoprotein alpha subunit	0	V			0.00136373	42	0.00071093	6	0	2
smd1	SPAC27D7.07c	Sm snRNP core protein Smd1	1	E	0.000194818	8	0.00243069	85	0.00100215	44	0.0018112	29
but1	SPAC27D7.12c	neddylation pathway protein But1	1	V	0	2	0	3	0.000234078	3	0.00256122	3
ssm4	SPAC27D7.13c	p150-Glued	3	V	0.000251655	2	0.000303404	13	0.000584222	8	0	1
tpr1	SPAC27D7.14c	RNA polymerase II associated Paf1 complex subunit Tpr1	1	V			0.000608079	16	0	3
SPAC27E2.02	SPAC27E2.02	IMPACT homolog, translational regulator	0	V			1.45693e-05	4	0	1
SPAC27E2.03c	SPAC27E2.03c	Obg-Like ATPase	0	V			0.000195843	32	0	1
cdc1	SPAC27E2.05	DNA polymerase delta small subunit Cdc1	18	E	0.000541023	4	0.00124532	29	0.00295598	22	0.000301371	13
SPAC27E2.06c	SPAC27E2.06c	mitochondrial methionine-tRNA ligase	0	E			0.000716698	36	0.000110992	6
mak2	SPAC27E2.09	histidine kinase Mak2	7	V	0.00485108	2	0.000360612	3	0.00140553	3
rfc3	SPAC27E2.10c	DNA replication factor C complex subunit Rfc3	4	E	1.64188e-05	2	0.000316867	36	0.000173553	26	0.000401639	20
cdc8	SPAC27F1.02c	tropomyosin	25	E	0.00573863	6	0.00143751	12	0.00315895	10	0.000374078	3
nuf2	SPAC27F1.04c	spindle pole body protein Nuf2	10	E	0.00478704	15	9.49806e-05	52	0.000180206	52	0.0023984	21
ost1	SPAC27F1.07	dolichyl-diphospho-oligosaccharide-protein glycosyltransferase Ost1	0	E			5.00395e-07	5	5.44298e-07	5	0	4
pdt1	SPAC27F1.08	Nramp family manganese ion transporter	1	V	0	1	0.000834854	12	0	2	0	1
prp10	SPAC27F1.09c	U2 snRNP-associated protein Sap155	9	E	5.7248e-05	9	0.00213088	60	0.00261672	43	0.0015733	21
SPAC29A4.02c	SPAC29A4.02c	translation elongation factor EF-1 gamma subunit	0	V			0.00177967	89	0.00114803	9	0	1
SPAC29A4.03c	SPAC29A4.03c	mitochondrial ribosomal protein subunit Mrps9	0	E	0	1	0.00148248	69	0.00185074	26	2.72345e-05	5
cbf5	SPAC29A4.04c	pseudouridylate synthase Cbf5	0	E	0	1	0.0119346	332	0.0247976	124	0.0401746	13
cam2	SPAC29A4.05	myosin I light chain Cam2	3	V	0.000124202	3	1.18898e-06	2	2.74828e-05	2	0	1
srb6	SPAC29A4.07	mediator complex subunit Srb6	2	E	0	1	2.36992e-05	20	0	19	0	2
prp19	SPAC29A4.08c	ubiquitin-protein ligase E4	3	E	0.0662291	78	0.00255941	20	0.00418293	8	2.7e-07	3
rrn5	SPAC29A4.10	RNA polymerase I upstream activation factor complex subunit Rrn5	3	E	0	1	0.000224277	10	0.00211362	6	0	2
rga3	SPAC29A4.11	Rho-type GTPase activating protein Rga3	0	V	0	1	0	1	0	1
SPAC29A4.13	SPAC29A4.13	urease accessory protein UreF	0	V			5.79938e-08	4	0	2	0	1
SPAC29A4.15	SPAC29A4.15	cytoplasmic serine-tRNA ligase Srs1	0	E	0	1	0.000926687	92	0.000416613	4
hal4	SPAC29A4.16	halotolerence protein 4	2	V	0	2	0	2	0	2
prw1	SPAC29A4.18	Clr6 histone deacetylase complex subunit Prw1	1	V	6.22969e-05	4	0.00016799	21	1.65877e-05	19	0.000285342	9
cta5	SPAC29A4.19c	Ca2ﳉ� transporting P-type ATPase P5 type Cta5	1	V	0	1	0	1	0	1
elp3	SPAC29A4.20	elongator complex, histone acetyltransferase subunit Elp3	4	V			0.0107518	236	0.00757705	38	0.0034155	5
ino80	SPAC29B12.01	SNF2 family helicase Ino80	2	E	0.00130729	3	0.000194022	20	0.000639551	14	0.00388122	10
set2	SPAC29B12.02c	histone lysine methyltransferase Set2	7	V	0	2	0.00304792	50	0.00175868	24	0.0154886	12
spd1	SPAC29B12.03	ribonucleotide reductase	13	V	0.00317369	4	9.42959e-05	9	0.000423764	9	0.00837825	6
snz1	SPAC29B12.04	pyridoxine biosynthesis protein	0	V			0.000441933	33	4.27666e-05	5	1.8e-07	4
SPAC29B12.05c	SPAC29B12.05c	mitochondrial S-adenosylmethionine-dependent methyltransferase	0	V			0.000105136	20	0	2	0	1
rcd1	SPAC29B12.06c	RNA-binding protein, CCR4-NOT complex subunit Rcd1	3	V			0.000297821	14	2.02769e-05	3
sec16	SPAC29B12.07	multidomain vesicle coat component Sec16	0	E	0.00192073	2	3.19502e-05	2	0.000183353	2
pgt1	SPAC29B12.10c	glutathione transporter Pgt1	3	V	0	1	0	2	0	1
SPAC29B12.14c	SPAC29B12.14c	purine transporter	0	V	0	1	0.000668195	3	0	1
prp3	SPAC29E6.02	U4/U6 x U5 tri-snRNP complex subunit Prp3	6	E	0	2	5.75503e-05	8	0	1	0	1
nnf1	SPAC29E6.04	kinetochore protein Nnf1	1	E	0	3	8.44801e-05	49	0.000148834	49	6.04471e-06	8
SPAC29E6.05c	SPAC29E6.05c	peptide methionine sulfoxide reductase	0	V			0.00095715	51	0.00172055	3	0	1
SPAC29E6.06c	SPAC29E6.06c	cytoplasmic cysteine-tRNA ligase Crs1	0	E			0.00130266	122	0.00125634	8
tbp1	SPAC29E6.08	TATA-binding protein	26	E	0.000150451	3	0.00638256	108	0.00470403	59	0.0122983	41
SPAC29E6.10c	SPAC29E6.10c	conserved fungal protein	0	V	0	1	0	1	0	1
smd2	SPAC2C4.03c	Sm snRNP core protein Smd2	0	E	0.0043326	5	0.00218464	78	0.0064245	51	0.00407109	36
SPAC2C4.06c	SPAC2C4.06c	rRNA methyltransferase	0	V			0.000296575	116	0	1
rbp28	SPAC2C4.11c	RNA-binding protein Rbp28	0	E			0.00102197	200	0.00280433	74	6.15426e-06	12
vma16	SPAC2C4.13	V-type ATPase V0 subunit c''	0	E			1.56418e-06	14	0	13	0.00247323	13
ppk11	SPAC2C4.14c	PAK-related kinase Ppk11	1	V	0	1	4.53634e-06	4	2.31229e-05	4	0	1
ubx2	SPAC2C4.15c	UBX domain protein Ubx2	2	V	0	1	0.000131918	4	0	1	0	1
rps801	SPAC2C4.16c	40S ribosomal protein S8	0	V	0.000271298	3	0.000167096	150	2.32802e-05	15
amt3	SPAC2E1P3.02c	ammonium transporter Amt3	1	V			0	1	0	1
cao1	SPAC2E1P3.04	copper amine oxidase Cao1	3	V	0	1	0.000440158	10	6.76339e-05	5
mns1	SPAC2E1P5.01c	mannosyl-oligosaccharide 1,2-alpha-mannosidase	0	V			4.06647e-05	4	0.000303307	3
mug109	SPAC2E1P5.02c	Rab GTPase binding protein upregulated in meiosis II	0	V	0.00787256	2	0	1	0	1
SPAC2E1P5.03	SPAC2E1P5.03	DNAJ domain protein Erj5	0	V	0	1	0.000101281	4	0	1
cwg2	SPAC2E1P5.04c	geranylgeranyltransferase I beta subunit Cwg2	4	E	0	1	4.4424e-05	4	0.000180271	2	0.000510897	2
SPAC2E1P5.05	SPAC2E1P5.05	U3 snoRNP-associated protein Rrp9	0	E			6.92612e-05	123	0.000128953	33	0	6
rpa49	SPAC2F3.03c	DNA-directed RNA polymerase I complex subunit Rpa49	3	E			0.00170158	198	6.17564e-05	21	0	3
kap104	SPAC2F3.06c	karyopherin Kap104	1	V			0.00150668	51	0	33	0.00167452	12
sut1	SPAC2F3.08	alpha-glucoside transporter Sut1	1	V	0	1	0	1	0	1
hem1	SPAC2F3.09	5-aminolevulinate synthase	0	E	0	1	0.000311689	22	0.00207334	9	0.0269479	4
lsk1	SPAC2F3.15	P-TEFb-associated cyclin-dependent protein kinase Lsk1	5	V	0.00108224	2	0.000185922	11	0.00119718	9	0.000854821	2
lsm6	SPAC2F3.17c	U6 snRNP-associated protein Lsm6	0	E			5.74997e-05	28	3.51807e-05	13	6.47015e-06	8
pom1	SPAC2F7.03c	DYRK family protein kinase Pom1	27	V	0.000399948	7	0.00116841	17	0.00242638	15	0.000207981	4
pmc2	SPAC2F7.04	mediator complex subunit Pmc2/Med1	3	V	0	2	2.36992e-05	20	0	19	1.653e-06	8
SPAC2F7.05c	SPAC2F7.05c	translation initiation factor eIF5	0	E			0.000417442	117	0.000122202	18	1.63688e-06	3
cph2	SPAC2F7.07c	Clr6 histone deacetylase associated PHD protein-2 Cph2	0	V			0	15	0	15	7.56001e-07	6
snf5	SPAC2F7.08c	SWI/SNF complex subunit Snf5	1	V	0.000930575	11	0	11	0	11	0.00042377	11
nrd1	SPAC2F7.11	RNA-binding protein Nrd1	8	V	0	1	5.17022e-05	5	0.00049204	4	0	1
wrs1	SPAC2F7.13c	tryptophan-tRNA ligase Wrs1	0	E			0.00165774	161	0.00125762	14	0.00170856	2
SPAC2F7.14c	SPAC2F7.14c	exosome subunit Rrp4	0	E			0.000909208	116	0.000803593	14	3.78e-06	9
pld1	SPAC2F7.16c	phospholipase D, Pld1	3	V			0.000613433	13	1.53737e-05	9
SPAC2F7.17	SPAC2F7.17	mitochondrial peptide chain release factor	0	V			0.000761054	55	0.000843282	10	0	1
vps45	SPAC2G11.03c	vacuolar sorting protein Vps45	2	V	0	1	0.00237988	20	0.000705216	5
SPAC2G11.05c	SPAC2G11.05c	BRO1 domain protein	0	V			0	1	0	1
vps4	SPAC2G11.06	AAA family ATPase Vps4	0	V			0.00339724	9	5.2188e-07	3	0	1
ptc3	SPAC2G11.07c	protein phosphatase 2c homolog 3	5	V			4.30323e-05	6	0.00017352	6	0	1
smn1	SPAC2G11.08c	SMN family protein Smn1	4	E	0	3	0	1	0	1
SPAC2G11.10c	SPAC2G11.10c	thiosulfate sulfurtransferase, URM1 activating enzyme	0	V			0.00223948	46	0.00148501	8
rqh1	SPAC2G11.12	RecQ type DNA helicase Rqh1	63	V	0.000293395	5	0.00226831	56	0.00374686	40	0.0195323	22
taf111	SPAC2G11.14	transcription factor TFIID complex subunit Taf111	3	E	0.00068859	3	0.000355929	56	0.000110199	38	0.000228252	14
SPAC30.02c	SPAC30.02c	elongator complex associated protein Kti2	0	V			1.81479e-05	7	0	3	0	1
tsn1	SPAC30.03c	translin	3	V	0	3	0	1	0	1	0	1
abc4	SPAC30.04c	glutathione S-conjugate-exporting ATPase Abc4	2	V			0	1	0	1
mmd1	SPAC30C2.02	deoxyhypusine hydroxylase	1	V			0.00271014	216	0.00240806	31
SPAC30C2.04	SPAC30C2.04	cofactor for methionyl-and glutamyl-tRNA synthetases	0	V	0	1	0.000822908	37	0.00016984	4	0	2
SPAC30D11.01c	SPAC30D11.01c	alpha-glucosidase	0	V			0	2	0	2	0	2
nup124	SPAC30D11.04c	nucleoporin Nup124	5	V			0	33	0	33	0	1
nth1	SPAC30D11.07	DNA endonuclease III	9	V			0.0011051	35	0.000503733	12	0.00168802	4
phf2	SPAC30D11.08c	Lsd1/2 complex PHD finger containing protein Phf2	1	E	0	2	0	3	0	3	0	2
cwf19	SPAC30D11.09	complexed with Cdc5 protein Cwf19	0	V	0	4	0	1	0	1	0	1
rad22	SPAC30D11.10	DNA recombination protein Rad22	61	V	0.00586281	11	0.000890589	39	0.00220898	26	0.0123877	13
rpl3802	SPAC30D11.12	60S ribosomal protein L38	0	V	0	1	0.00010312	110	0.00013984	50	7.86315e-07	42
hus5	SPAC30D11.13	SUMO conjugating enzyme Hus5	21	V	0.00416517	4	0.000632077	15	0.00409431	9	0.00179244	3
trm112	SPAC31A2.02	protein and tRNA methyltransferase regulatory subunit Trm112	0	V			0.000342387	68	0.000386525	4	1.08e-06	2
SPAC31A2.04c	SPAC31A2.04c	20S proteasome component beta 4	0	E	0	2	0.0015047	46	0.000356339	28	6.39515e-06	15
mis4	SPAC31A2.05c	adherin, cohesin loading factor Mis4	14	E	0	2	0.000703494	16	0.000412313	14	0.000855901	5
dbp10	SPAC31A2.07c	ATP-dependent RNA helicase Dbp10	1	E			1.89512e-06	73	0	3
apm4	SPAC31A2.09c	AP-2 adaptor complex subunit Apm4	1	V			0.000204244	12	0	8	0	4
sft1	SPAC31A2.13c	SNARE Sft1	0	V	0	1	1.20741e-05	4	7.49414e-05	4
bun107	SPAC31A2.14	WD repeat protein, human WDR48 family Bun107	0	V	0	1	0	1	0	1	0	1
dcc1	SPAC31A2.15c	Ctf18 RFC-like complex subunit Dcc1	2	V			7.29583e-06	14	1.99546e-05	14	0	2
zds1	SPAC31F12.01	zds family protein phosphatase type A regulator Zds1	3	V			1.01254e-05	3	0	1
sap49	SPAC31G5.01	U2 snRNP-associated RNA-binding protein Sap49	1	E	2.88801e-05	4	1.58703e-05	40	2.24131e-05	37	7.41286e-05	12
SPAC31G5.02	SPAC31G5.02	ER chaperone Rot1	0	E	0	1	0.00180055	11	0	1
rps1101	SPAC31G5.03	40S ribosomal protein S11	0	V	0.000271298	3	0.000578716	169	0.000699782	67	4.65395e-06	10
SPAC31G5.04	SPAC31G5.04	homoisocitrate dehydrogenase	0	V	0	1	0.000259683	19	0.000161148	6	0	1
SPAC31G5.05c	SPAC31G5.05c	ribulose phosphate 3-epimerase	0	E			0.00292708	92	0.00412218	22	0.000854821	4
ups1	SPAC31G5.08	uroporphyrinogen-III synthase Ups1	2	E			1.72656e-05	8	4.43372e-05	4	0	2
spk1	SPAC31G5.09c	MAP kinase Spk1	16	V	5.83119e-05	2	0.000209552	12	0.00104824	11	0.00372314	3
pac2	SPAC31G5.11	cAMP-independent regulatory protein Pac2	7	V	0	1	0	1	0	1
rpn11	SPAC31G5.13	19S proteasome regulatory subunit Rpn11	19	E	0.00966563	37	0.00387466	62	0.00296034	41	0.00777933	36
gcv1	SPAC31G5.14	glycine decarboxylase T subunit	0	V			0.00117885	58	0.00175026	25	0.00768208	13
psd3	SPAC31G5.15	phosphatidylserine decarboxylase Psd3	1	V			0	5	0	5	0	1
dpm1	SPAC31G5.16c	dolichol-phosphate mannosyltransferase catalytic subunit Dpm1	5	E			0.00893254	63	0.0029005	19	0.0152195	8
rps1001	SPAC31G5.17c	40S ribosomal protein S10	0	V	0	1	6.56262e-05	146	3.42537e-06	15
pup2	SPAC323.02c	20S proteasome component alpha 5, Pup2	0	E	0.00260459	6	0.000341562	35	1.32705e-05	16	3.39429e-07	7
SPAC323.05c	SPAC323.05c	protein methyltransferase Mtq2	0	V			3.20639e-05	11	0.000432923	4
uba5	SPAC323.06c	NEDD8 activating enzyme	0	E	0	1	0.000213559	15	0	1	0	1
SPAC328.01c	SPAC328.01c	karyopherin	0	V			4.53814e-06	34	0.000105986	34	0.00560528	10
tps1	SPAC328.03	alpha,alpha-trehalose-phosphate synthase [UDP-forming]	14	V	0	4	0.00416789	44	0.000848604	12	2.59047e-05	5
ubp2	SPAC328.06	ubiquitin C-terminal hydrolase Ubp2	0	V	0	1	0	1	0	1	0	1
SPAC328.07c	SPAC328.07c	heavy metal ion homeostasis protein	0	V	0	1	0.00013061	4	0	1
rps502	SPAC328.10c	40S ribosomal protein S5	0	V	0	1	0.00118618	183	0.000808467	53	1.57959e-05	6
tif212	SPAC32A11.04c	translation initiation factor eIF2 beta subunit	0	E	0	1	0.0016123	129	0.00102869	44	0.00144125	37
erg8	SPAC343.01c	phosphomevalonate kinase	0	E			0	2	0	2	0	2
img1	SPAC343.02	mitochondrial ribosomal protein subunit L19	0	E			4.27886e-05	21	2.51523e-06	9
apc11	SPAC343.03	anaphase-promoting complex subunit Apc11	2	E	0	4	0.000128291	21	8.57958e-05	20	6.43308e-07	8
SPAC343.04c	SPAC343.04c	WD repeat protein, human WDR26 family, ubiquitin ligase complex subunit	0	V	0	1	0	1	0	1
vma1	SPAC343.05	V-type ATPase V1 domain, subunit A	4	E			0.00286453	35	0.000365972	16	0	11
ubx3	SPAC343.09	UBX domain protein Ubx3, Cdc48 cofactor	1	V	0	1	0.000289406	12	3.12042e-05	2	0.00199387	2
met11	SPAC343.10	methylenetetrahydrofolate reductase Met11	1	V			5.87739e-06	11	0	8	0	6
msc1	SPAC343.11c	multi-copy suppressor of Chk1	8	V	0.00418412	13	0.000333159	22	0.0012477	22	0.00947354	12
SPAC343.13	SPAC343.13	mitochondrial glutamyl-tRNA amidotransferase beta subunit	0	E			0.00215545	60	0.000444362	7	1.89e-06	4
SPAC343.14c	SPAC343.14c	translation initiation factor eIF2B beta subunit	0	E			0.00140775	40	1.9397e-05	8	0	7
tit1	SPAC343.15	tRNA isopentenyltransferase	7	V			0.000625645	43	0	1
lys2	SPAC343.16	homoaconitate hydratase Lys2	10	V			5.2868e-05	17	7.77464e-05	10	0.000854821	2
rfp2	SPAC343.18	SUMO-targeted ubiquitin-protein ligase subunit Rfp2	3	V			6.78222e-05	4	4.64086e-05	3
lsb6	SPAC343.19	1-phosphatidylinositol 4-kinase Lsb6	0	V			2.18992e-06	3	0.000134271	2
kms1	SPAC3A11.05c	meiotic spindle pole body protein Kms1	8	V	0.00153674	4	3.47177e-05	4	0	2	0	1
pcu4	SPAC3A11.08	cullin 4	17	V	0.00348912	7	0.0010966	20	0.00339482	16	0.0124673	12
SPAC3A11.10c	SPAC3A11.10c	dipeptidyl peptidase	0	V	0	1	5.67723e-05	3	0.00070506	2	0	1
rpt5	SPAC3A11.12c	19S proteasome regulatory subunit Rpt5	1	E	0.00045406	5	5.28729e-05	29	0	8	8.45955e-06	4
SPAC3A11.13	SPAC3A11.13	prefoldin subunit 6	0	V			0.00264487	63	0	16	0.000306973	13
pkl1	SPAC3A11.14c	kinesin-like protein Pkl1	12	V	0	1	0.000484596	52	0.00158065	51	0.00197332	10
SPAC3A12.02	SPAC3A12.02	mitochondrial inorganic diphosphatase	0	E			0.000670764	30	0.00120247	29	0.0202496	9
SPAC3A12.04c	SPAC3A12.04c	RNase P and RNase MRP subunit p30	0	E			0.000893264	36	0	1
taf2	SPAC3A12.05c	TATA-binding protein associated factor Taf2	1	E			1.70296e-05	13	0	7
rpb11	SPAC3A12.07	RNA polymerase II complex subunit Rpb11	12	E	1.38443e-06	7	0.00109635	108	0.00194212	83	0.00326699	42
SPAC3A12.09c	SPAC3A12.09c	urease accessory protein UreD	0	V			0	3	0	2
rpl2001	SPAC3A12.10	60S ribosomal protein L20a	0	V	0.000873092	6	0.000154151	146	1.07182e-07	19
cwf2	SPAC3A12.11c	RNA-binding protein Cwf2	6	E	0.0385651	95	4.0044e-05	19	4.94841e-06	7	0	2
atp11	SPAC3A12.12	F1-ATPase chaperone Atp11	8	V			0.000103624	13	0	2
SPAC3A12.13c	SPAC3A12.13c	translation initiation factor eIF3j	0	V	0.00493814	2	6.45951e-05	37	0.000421032	37
cam1	SPAC3A12.14	calmodulin Cam1	7	E	0.00734627	8	0.00023234	8	0.000361211	5
vps53	SPAC3A12.15	GARP complex subunit Vps53	0	E	0	1	0	1	0	1
tim17	SPAC3A12.16c	TIM23 translocase complex subunit Tim17	0	E			0.000823831	19	0.001926	10	1.53e-05	4
cys12	SPAC3A12.17c	cysteine synthase Cys12	2	V			2.20617e-05	16	0.000543547	14	0.0036029	7
zwf1	SPAC3A12.18	glucose-6-phosphate 1-dehydrogenase	0	E	0	1	2.43315e-05	14	0	4	0.000186421	3
rhp55	SPAC3C7.03c	RecA family ATPase Rhp55	21	V	0.000300864	3	0.000265852	20	0.000137826	17	0.000179822	5
pit1	SPAC3C7.06c	serine/threonine protein kinase, meiotic Pit1	2	V			0.000586839	2	0.00070506	2
elf1	SPAC3C7.08c	AAA family ATPase Elf1	3	V	0	1	2.30561e-05	4	0	3
cnx1	SPAC3C7.11c	calnexin Cnx1	12	E	0.00108224	2	0.000392485	11	0.000237771	2	0	1
tip1	SPAC3C7.12	CLIP170 family protein Tip1	22	V	0.00384477	10	0.000444758	13	0.00085763	13	0.00242287	3
SPAC3C7.13c	SPAC3C7.13c	glucose-6-phosphate 1-dehydrogenase	0	V			0	4	0	3	0.000170398	2
obr1	SPAC3C7.14c	ubiquitinated histone-like protein Uhp1	6	V	0	1	0.00132387	27	0.0014096	2
trk1	SPAC3F10.02c	potassium ion transporter Trk1	14	V			0.000599645	3	0.00070506	2	0	1
grs1	SPAC3F10.03	mitochondrial and cytoplasmic glycine-tRNA ligase Grs1	1	E	0	1	0.00151384	67	0.000207761	8
gsa1	SPAC3F10.04	glutathione synthetase large subunit Gsa1	8	V	0	2	0.000171282	11	0.000690808	10	0.00156285	6
SPAC3F10.09	SPAC3F10.09	1-	0	V			0.000228034	11	0	5	0	1
abc2	SPAC3F10.11c	glutathione S-conjugate-exporting ATPase Abc2	2	V			0.000586839	2	0.00070506	2
ucp6	SPAC3F10.13	UBA domain protein Ucp6	0	V	0	1	0	1	0	1	0	1
SPAC3F10.16c	SPAC3F10.16c	GTP binding protein, HSR1-related	0	V			0.000720036	184	4.0918e-05	13	0	1
hrp3	SPAC3G6.01	ATP-dependent DNA helicase Hrp3	4	V			0.000148872	13	6.99507e-05	3
dss1	SPAC3G6.02	mRNA export protein Dss1	7	V	0.0154335	17	0.00126093	57	0.0086814	57	0.0106583	15
SPAC3G6.03c	SPAC3G6.03c	Maf-like protein	0	V			0.000759618	44	0	1
rnp24	SPAC3G6.04	RNA-binding protein Rnp24	1	V	0	2	5.13891e-05	143	5.94926e-08	9
rad2	SPAC3G6.06c	FEN-1 endonuclease Rad2	52	V	0	1	0.00752967	107	0.00564366	48	0.00788077	19
tps2	SPAC3G6.09c	trehalose-phosphate synthase Tps2	2	V			4.91099e-07	5	1.29487e-06	5	2.13283e-06	5
oar2	SPAC3G9.02	3-oxoacyl-[acyl-carrier-protein] reductase Oar2	0	V			0	3	0	3
rpl2301	SPAC3G9.03	60S ribosomal protein L23	0	V	0.000271298	3	0.000533675	169	0.00072341	60	1.54286e-08	6
ssu72	SPAC3G9.04	phosphoric ester hydrolase Ssu72	0	V	0	2	0.00224995	27	0.000181964	13	0.000510516	8
frs2	SPAC3G9.06	cytoplasmic phenylalanine-tRNA ligase alpha subunit Frs2	0	E			0.000604056	61	1.49135e-06	4	0	1
hos2	SPAC3G9.07c	histone deacetylase	17	V	0	2	0.00133835	34	0.00257617	26	1.35e-07	4
png1	SPAC3G9.08	ING family homolog Png1	2	V	0	2	0.000180237	15	0	12	8.19956e-05	8
tif211	SPAC3G9.09c	translation initiation factor eIF2 alpha subunit	0	E	0.00324407	3	0.00803229	152	0.00462746	53	0.00186096	36
rrp41	SPAC3G9.10c	exosomal 3'-to-5' phosphorolytic exoribonuclease Rrp41	0	E	0	1	0.00143679	67	0.00122718	14	0	8
SPAC3G9.11c	SPAC3G9.11c	pyruvate decarboxylase	0	V			0.000150806	14	0.000247691	14	0.00482192	4
peg1	SPAC3G9.12	CLASP family microtubule-associated protein	2	E	0.000844772	7	5.97856e-05	12	0.000149657	12	0	1
msw1	SPAC3G9.13c	mitochondrial tryptophan-tRNA ligase Msw1	0	E			0.00234686	81	0.0012193	11	0.00256122	2
sak1	SPAC3G9.14	transcriptional repressor Sak1	2	E			4.98792e-06	4	6.4597e-05	4
fcf2	SPAC3G9.15c	rRNA processing protein Fcf2	0	E			0.000422238	104	2.38665e-08	2
bet5	SPAC3G9.16c	TRAPP complex subunit Bet5	0	E			0.00028133	8	2.6094e-07	4	0	1
orc3	SPAC3H1.01c	origin recognition complex subunit Orp3	1	E	0	6	3.33699e-05	25	4.22161e-05	25	0	6
SPAC3H1.05	SPAC3H1.05	CAAX prenyl protease	0	V	0	1	0.00303977	21	0.00152872	5
aru1	SPAC3H1.07	arginase Aru1	1	V			1.71379e-05	11	0.000422672	9	0.00187696	8
snt2	SPAC3H1.12c	Lid2 complex subunit Snt2	1	V	0	6	0	4	0	4	0	4
rps1401	SPAC3H5.05c	40S ribosomal protein S14	0	V	0.000221594	2	0.000797834	177	0.00302318	67	0.000100199	13
pol1	SPAC3H5.06c	DNA polymerase alpha catalytic subunit	22	E	0.00517393	6	0.00170754	67	0.00631934	54	0.00221088	34
rpl702	SPAC3H5.07	60S ribosomal protein L7	4	V	0.000271298	3	0.000239047	160	0.000190801	70	7.86315e-07	42
rpl3202	SPAC3H5.10	60S ribosomal protein L32	2	V	0.000942449	5	0.000233204	142	0.00189314	56	0.000388324	8
SPAC3H5.11	SPAC3H5.11	NAD/NADH kinase	0	V			0	2	0	2	0	2
rpl501	SPAC3H5.12c	60S ribosomal protein L5	0	V	0.000192164	2	0.000141521	123	7.71817e-05	44	9.29406e-08	9
mms1	SPAC3H8.05c	E3 ubiquitin ligase complex subunit Mms1	3	V			0	3	0	3
aur1	SPAC3H8.06	inositol phosphorylceramide synthase Aur1	3	E	0	1	0.00021591	8	0	1
pac10	SPAC3H8.07c	prefoldin subunit 3 Pac10	0	V			0.00801424	88	0.000378826	19	0.00044929	16
spo20	SPAC3H8.10	sec14 cytosolic factor family Sec14	8	V			0.000430788	11	0	1	0	1
tel2	SPAC458.03	Tel2/Rad-5/Clk-2 family protein Tel2	6	E	0.00757088	9	0.000199756	17	0.000712259	16	0.00304572	6
dil1	SPAC458.04c	dynein intermediate light chain Dil1	3	V	0.00634362	11	0.00181995	9	0.00462506	9
pik3	SPAC458.05	phosphatidylinositol 3-kinase Pik3	9	V			0.00149793	21	0.00426673	10	0.00474901	5
tfa1	SPAC458.07	transcription factor TFIIE alpha subunit, TFIIEA, Tfa1	1	E	7.31883e-08	2	1.67472e-05	41	3.72797e-05	40	4.39689e-06	8
SPAC4A8.02c	SPAC4A8.02c	conserved protein, UPF0047 family	0	V			0.000805231	34	0	1
isp6	SPAC4A8.04	vacuolar serine protease Isp6	4	V			8.19745e-05	4	0.0024396	4
myp2	SPAC4A8.05c	myosin II heavy chain Myo3	17	V	0.0176569	13	0.00186508	13	0.00532103	12	0	3
SPAC4A8.07c	SPAC4A8.07c	sphingoid long chain base kinase	0	V			0.000142135	10	0.000569567	10	0	2
vrs2	SPAC4A8.08c	mitochondrial valine-tRNA ligase Vrs2/Vas2	1	E	0	1	4.69053e-05	7	2.53337e-06	2	0	1
cwf21	SPAC4A8.09c	complexed with Cdc5 protein Cwf21	0	V	0	4	0	1	0	1	0	1
fas2	SPAC4A8.11c	fatty acid synthase alpha subunit Lsd1	11	E	0	1	0.000606535	17	0.000955042	6	0	1
sds22	SPAC4A8.12c	protein phosphatase regulatory subunit Sds22	18	E			0.00188752	15	0.00211822	6	0	1
pts1	SPAC4A8.13c	20S proteasome component beta 5	2	E	0	2	0.000459205	34	4.11692e-05	20	0	8
SPAC4A8.14	SPAC4A8.14	ribose-phosphate pyrophosphokinase	0	V	0	1	3.15621e-05	15	0.00018991	11	0.00664023	6
cdc3	SPAC4A8.15c	profilin	32	E	1.43179e-05	2	0.000509009	18	0.00168818	12	0.00689888	5
tif33	SPAC4A8.16c	translation initiation factor eIF3c	0	E	0.000129609	3	0.000572021	144	0.000270819	42	0.000622339	28
ryh1	SPAC4C5.02c	GTPase Ryh1	15	V	0.0173856	8	0.00164083	18	0.00285863	11	0.0160666	4
rad31	SPAC4C5.04	SUMO E1-like activator enzyme Rad31	7	V			0.000985171	24	0.000999476	9	0	2
SPAC4D7.02c	SPAC4D7.02c	glycerophosphoryl diester phosphodiesterase	0	V			0.000772128	6	0.00122601	5
pop2	SPAC4D7.03	F-box/WD repeat protein Pop2	9	V	0.00102621	8	5.93229e-05	12	7.32218e-05	10	0.00119087	5
SPAC4D7.04c	SPAC4D7.04c	cis-prenyltransferase	0	E			0.00279722	61	0.00318683	11	0	2
sum1	SPAC4D7.05	translation initiation factor eIF3i	3	E	0.007427	8	0.00325728	147	0.00774019	44	0.000107334	34
SPAC4D7.06c	SPAC4D7.06c	siroheme synthase	0	V			3.0015e-05	12	4.91722e-05	6	0	1
ade4	SPAC4D7.08c	amidophosphoribosyltransferase Ade4	1	V			0.00181653	78	0.0024764	26	0.0108131	18
tif223	SPAC4D7.09	translation initiation factor eIF2B gamma subunit	0	E			0	7	0	7	0	7
aap1	SPAC4F10.02	aspartyl aminopeptidase Aap1	0	V	0	1	2.9043e-05	11	0	1
SPAC4F10.03c	SPAC4F10.03c	tRNA 2'-O-ribose methyltransferase	0	E			7.46196e-05	95	0	1
SPAC4F10.05c	SPAC4F10.05c	mitochondrial lipoate-protein ligase	0	V			0.000636924	21	0.00030782	10	0	2
SPAC4F10.09c	SPAC4F10.09c	ribosome biogenesis protein Noc1	0	E	0	1	7.54425e-05	113	0.000119467	23
mnn9	SPAC4F10.10c	mannosyltransferase complex subunit, Anp family Mnn9	2	E	0	1	0.000456757	7	0.00211067	5	1.62e-06	3
spn1	SPAC4F10.11	septin Spn1	2	V	0.00323749	6	0.00186075	8	0.000330885	4	0	3
fta1	SPAC4F10.12	CENP-L homolog Fta1	2	E	0.000908174	6	0.00012107	60	0.000193889	60	0.000386399	6
mpd2	SPAC4F10.13c	GYF domain protein	3	V			5.89587e-05	3	0	1
btf3	SPAC4F10.14c	nascent polypeptide-associated complex beta subunit	2	V			0.000366172	106	1.46095e-06	3	0	1
wsp1	SPAC4F10.15c	WASp homolog	7	V	0.00193737	7	0.00294804	33	0.00256755	15	8.10001e-06	4
grx1	SPAC4F10.20	glutaredoxin Grx1	3	V			0.000385098	18	0	1
did4	SPAC4F8.01	ESCRT III complex subunit Did4	0	V			4.13647e-05	8	3.2835e-06	5	0	1
sdo1	SPAC4F8.03	SBDS family ribosome maturation protein Sdo1	0	V			0.000926932	35	0.000736068	9	0	1
SPAC4F8.04	SPAC4F8.04	Brix domain protein Rpf1	0	E			0.000318128	144	6.48892e-07	16
SPAC4F8.06	SPAC4F8.06	mitochondrial ribosomal protein subunit S12	0	E			0.000959821	85	0.000461988	43	0.000881654	26
hxk2	SPAC4F8.07c	hexokinase 2	4	E	0	1	0.000347341	22	0.00140185	21	0.00259902	10
stg1	SPAC4F8.10c	SM22/transgelin-like actin modulating protein Stg1	1	V	0.000606414	3	0	4	0	4
spp42	SPAC4F8.12c	U5 snRNP complex subunit Spp42	1	E	0.00963735	11	0.00763683	85	0.0105668	56	0.00136337	26
rng2	SPAC4F8.13c	IQGAP	12	E	0.0203637	32	0.00325401	34	0.000512617	7	1.16357e-05	2
hcs1	SPAC4F8.14c	3-hydroxy-3-methylglutaryl-CoA synthase	19	E			0.000264106	19	0.00086506	10	0.00308809	3
itr1	SPAC4F8.15	myo-inositol transporter Itr1	1	V	0	1	0	2	0	2
sss1	SPAC4G8.02c	translocon gamma subunit Sss1	0	E	0	1	0.00095238	22	0.00183014	6	5.40001e-07	2
SPAC4G8.07c	SPAC4G8.07c	tRNA	0	V			0.00129466	157	1.56935e-06	2
SPAC4G8.09	SPAC4G8.09	mitochondrial leucine-tRNA ligase	0	E			0.00195593	70	0.000358809	5
gos1	SPAC4G8.10	SNARE Gos1	0	V	0	1	0.000241453	11	7.49414e-05	4	0	1
rnh201	SPAC4G9.02	ribonuclease H2 complex subunit Rnh201	0	V	0	1	0.000649756	23	0.000715365	2
adk1	SPAC4G9.03	adenylate kinase Adk1	2	E			0.00205096	108	0.00542409	45	0.0264716	7
rpc2	SPAC4G9.08c	DNA-directed RNA polymerase III complex subunit Rpc2	3	E	0	1	0.00130821	83	0.000174547	27	0.000209319	16
arg11	SPAC4G9.09c	N-acetyl-gamma-glutamyl-phosphate reductase/acetylglutamate kinase	2	V			8.88647e-05	17	5.13391e-07	5	0.000962802	5
arg3	SPAC4G9.10	ornithine carbamoyltransferase Arg3	9	V			0.00357768	88	0.00118868	18	0.00223917	13
cmb1	SPAC4G9.11c	cytosine-mismatch binding protein 1	3	V			0	2	0	2
SPAC4G9.12	SPAC4G9.12	gluconokinase	0	V	0	1	5.05978e-05	9	1.77864e-05	4	4.97304e-05	3
vps26	SPAC4G9.13c	retromer complex subunit Vps26	1	V	0.00277901	2	4.62736e-05	7	0.000506706	5	0	3
rpl901	SPAC4G9.16c	60S ribosomal protein L9	0	V	0	1	0.000452451	160	0.000273885	67	3.82515e-05	19
mrps5	SPAC4G9.17c	mitochondrial ribosomal protein subunit S5	0	E			0.000156165	29	0	5
swc3	SPAC4H3.02c	Swr1 complex subunit Swc3	0	V			0	14	0	14	0	2
SPAC4H3.03c	SPAC4H3.03c	glucan 1,4-alpha-glucosidase	0	V			0.000116779	10	1.72679e-05	2
SPAC4H3.04c	SPAC4H3.04c	UPF0103 family	0	V			0.000407966	15	0.00174495	3	0	1
srs2	SPAC4H3.05	ATP-dependent DNA helicase, UvrD subfamily	18	V	0	1	0.00364122	51	0.00229709	16	1.11221e-06	5
SPAC4H3.07c	SPAC4H3.07c	protein phosphatase Fmp31	0	V	0	1	1.01789e-05	5	0	1
SPAC4H3.08	SPAC4H3.08	3-hydroxyacyl-CoA dehydrogenase	0	E			0.00059919	5	0	1
SPAC4H3.09	SPAC4H3.09	mitochondrial type II fatty acid synthase component	0	E			0.00410508	84	0.00355032	16	2.16e-06	2
pyk1	SPAC4H3.10c	pyruvate kinase	0	E	0.00021448	2	0.00902907	137	0.0292082	78	0.158014	24
ppc89	SPAC4H3.11c	spindle pole body protein Ppc89	1	E	0.000634197	6	1.08384e-05	4	2.98088e-05	4
eft201	SPAC513.01c	translation elongation factor 2	0	V	0	1	6.23046e-05	30	3.86437e-05	3
ams1	SPAC513.05	alpha-mannosidase	1	V			0.00270133	24	0.00070506	2
SPAC521.04c	SPAC521.04c	calcium permease	0	V			2.77384e-05	2	0.00164532	2
rps802	SPAC521.05	40S ribosomal protein S8	0	V	0	1	0.000283459	150	2.32802e-05	15
alg13	SPAC56E4.02c	N-acetylglucosaminyldiphosphodolichol N-acetylglucosaminyltransferase Alg13	0	E			9.66918e-05	5	0	3	3.6e-07	3
SPAC56E4.03	SPAC56E4.03	aromatic aminotransferase	0	V			1.64854e-05	10	0.000546651	10	0.00080743	2
cut6	SPAC56E4.04c	acetyl-CoA/biotin carboxylase	3	E	0.00493814	2	0.00227493	20	0.00518696	15	0.00574709	7
ggt2	SPAC56E4.06c	gamma-glutamyltranspeptidase Ggt2	0	V			2.6955e-05	14	0.000108632	13	0.00113688	6
SPAC56F8.03	SPAC56F8.03	translation initiation factor IF2	0	E			0.000662025	92	0.00102718	58	2.01969e-06	24
ppt1	SPAC56F8.04c	para-hydroxybenzoate--polyprenyltransferasePpt1	5	V			0.000322135	23	1.6214e-05	5	0	1
alg10	SPAC56F8.06c	dolichyl-phosphate-glucose-glycolipid alpha-glucosyltransferase Alg10	0	V			4.27325e-05	6	5.73882e-05	2	0.0042633	2
mud1	SPAC56F8.08	UBA domain protein Mud1	2	V			7.241e-05	9	4.80734e-05	2
rrp8	SPAC56F8.09	rRNA methyltransferase Rrp8	0	V			0.000487966	166	7.69906e-05	9
met9	SPAC56F8.10	methylenetetrahydrofolate reductase Met9	1	E			2.24734e-05	15	0.000173118	11	0.0105844	7
spc3	SPAC56F8.11	signal peptidase subunit Spc3	0	E			0.000202831	9	0.000810165	7
cdr2	SPAC57A10.02	serine/threonine protein kinase Cdr2	17	V	0.000105598	2	0.000106351	13	0.000337104	13	0	3
cyp1	SPAC57A10.03	cyclophilin family peptidyl-prolyl cis-trans isomerase Cyp1	1	V	0	3	4.24688e-05	5	0	1
pof1	SPAC57A10.05c	F-box/WD repeat protein protein Pof1	3	E	0.00108224	3	0.000550254	16	0.000403815	11	0.000280075	6
SPAC57A10.07	SPAC57A10.07	conserved protein	0	V	0	1	0	1	0	1
nhp6	SPAC57A10.09c	High-mobility group non-histone chromatin protein	1	V			0.000142918	22	3.42761e-05	4
sla1	SPAC57A10.10c	La protein homolog	7	V	0.000401275	3	0.00122228	172	0.00110999	18	0	8
tim40	SPAC57A10.11c	TIM22 inner membrane protein import complex subunit Tim40	0	E			0.000125222	9	9.43448e-05	2
ura3	SPAC57A10.12c	dihydroorotate dehydrogenase Ura3	17	V			0.00132137	46	0.000151219	5	2.34079e-05	2
pabp	SPAC57A7.04c	mRNA export shuttling protein	6	V	0.000385426	2	0.00392785	104	0.00508666	43	1.51442e-05	27
SPAC57A7.06	SPAC57A7.06	U3 snoRNP protein Utp14	0	E			4.4378e-05	128	5.01859e-07	24
SPAC57A7.07c	SPAC57A7.07c	homocysteine methyltransferase	0	V	0	1	0	1	0	1
pzh1	SPAC57A7.08	serine/threonine protein phosphatase Pzh1	4	V			0.000374211	3	0.0014096	2
sec21	SPAC57A7.10c	coatomer gamma subunit Sec21	0	E	0	1	0.00350965	39	0.0010704	10	6.93001e-07	7
mip1	SPAC57A7.11	WD repeat protein, Raptor homolog Mip1	7	E	0.000439779	4	0.000739056	24	0.000326867	11	0.000404432	6
med13	SPAC589.02c	mediator complex subunit Srb9	4	V	0.00908201	11	0.000349975	23	0.00143339	20	0.000860682	12
SPAC589.06c	SPAC589.06c	pho88 family protein	0	V	0	1	0.000138019	2	0	1
dam1	SPAC589.08c	DASH complex subunit Dam1	16	V	1.31739e-06	6	0	45	0	45	0.000178038	8
rps2202	SPAC5D6.01	40S ribosomal protein S15a	0	V	0.000271298	3	0.000718015	194	0.00247185	123	0.000813621	62
sep11	SPAC5D6.05	mediator complex subunit Pmc6	3	V	0	4	6.38197e-05	22	0	19	0.000352458	7
alg14	SPAC5D6.06c	UDP-GlcNAc transferase associated protein Alg14	0	V			0	3	0	3	3.6e-07	3
mes1	SPAC5D6.08c	meiosis II protein Mes1	10	V	0.000774851	5	0.000151208	7	5.49018e-05	4
mug86	SPAC5D6.09c	acetate transmembrane transporter	0	V	0	1	0	3	0	1
SPAC5D6.13	SPAC5D6.13	Golgi phosphoprotein 3 family	0	V			6.41769e-05	7	0	1
adh4	SPAC5H10.06c	alcohol dehydrogenase Adh4	2	V			0.00190748	29	1.49889e-05	8	0	4
pan6	SPAC5H10.08c	pantoate-beta-alanine ligase	0	V			0.00165129	40	0.000373641	6	0	2
SPAC5H10.09c	SPAC5H10.09c	3-methyl-2-oxobutanoatehydroxymethyltransferase	0	V			0.00119697	45	0.000837838	7	0.00170856	3
gmh2	SPAC5H10.13c	alpha-1,2-galactosyltransferase Gmh2	1	V	0	1	4.71964e-05	2	0	1
snu13	SPAC607.03c	U3 snoRNP-associated protein Snu13	0	E			0.00475529	281	0.00547645	76	0.0892047	28
rpn9	SPAC607.05	19S proteasome regulatory subunit Rpn9	2	E	0	2	0.00102242	39	0.000102371	17	0.00598186	10
SPAC607.07c	SPAC607.07c	sequence orphan	0	V	0	1	0	1	0	1
btn1	SPAC607.09c	battenin CLN3 family protein	9	V	0	1	2.67976e-05	4	0.000203278	3
spo3	SPAC607.10	sporulation protein Spo3	6	V			0.000194293	10	5.06445e-05	2	0	1
arp3	SPAC630.03	actin-like protein Arp3	17	E	0.00294858	7	0.00018371	18	0.0019121	10	0.000854821	7
erg25	SPAC630.08c	C-4 methylsterol oxidase	1	E			0.000370679	22	0.000816278	13	3.6e-06	4
vps55	SPAC630.11	vacuolar sorting protein Vps55	0	V			0	1	0	1
tsc2	SPAC630.13c	tuberin	14	V	0	1	0.000534049	11	0.00119979	11	0.00261111	4
tup12	SPAC630.14c	transcriptional corepressor Tup12	16	V	0.0035078	5	0.000191753	11	0.00113359	5	0	2
acp2	SPAC631.01c	F-actin capping protein beta subunit	2	V	0	2	0.000859878	21	4.18472e-06	7	0	3
SPAC631.02	SPAC631.02	bromodomain protein	0	V	0	1	4.71964e-05	2	0	1
vma2	SPAC637.05c	V-type ATPase V1 subunit B	1	E	0.000466889	2	0.00317151	38	0.00394887	15	0.00247323	13
SPAC637.06	SPAC637.06	alpha-1,2-galactosyltransferase	0	V			8.413e-05	7	0	1	0	1
moe1	SPAC637.07	translation initiation factor eIF3d Moe1	8	V	0.00394309	6	0.00324451	70	0.00557799	45	0.0363119	33
SPAC637.08	SPAC637.08	iron-sulfur cluster assembly ATPase Nbp35	0	E			0.000730042	34	0.00070506	3
rpn10	SPAC637.10c	19S proteasome regulatory subunit Rpn10	10	V	0.00443366	13	0.00418831	76	0.00434527	34	0.0205889	16
rpm2	SPAC637.11	mitochondrial ATP-dependent RNA helicase Rpm2	3	V			0.00123787	7	0	1
mst1	SPAC637.12c	KAT5 family histone acetyltransferase Mst1	7	E	0.0129401	12	0.000715145	28	0.00055657	16	0.00245014	9
pct1	SPAC644.04	RNA 5'-triphosphatase	10	E	0.00844553	6	0.000232232	10	0.00109389	6	0	2
SPAC644.05c	SPAC644.05c	deoxyuridine 5'-triphosphate nucleotidohydrolase	0	E			0.0115337	152	0.00471828	16	0.0049899	5
cdr1	SPAC644.06c	NIM1 family serine/threonine protein kinase Cdr1/Nim1	44	V	0.0032813	6	0.00190494	17	0.00530011	17	0	3
SPAC644.07	SPAC644.07	mitochondrial Rieske ISP assembly ATPase	0	V			0.000255794	15	0	3
SPAC644.08	SPAC644.08	methionine salvage haloacid dehalogenase-like hydrolase	0	V			0.000810931	10	0.000149902	4	0	2
SPAC644.09	SPAC644.09	alanine racemase	0	V			0.0008724	55	8.14803e-05	3
pkp1	SPAC644.11c	mitochondrial pyruvate dehydrogenase	0	V			0	4	0	4	0	3
cdc5	SPAC644.12	cell division control protein, splicing factor Cdc5	32	E	0.00895467	50	0.00955382	56	0.0177542	53	0.0257982	51
SPAC644.13c	SPAC644.13c	Rab GTPase binding	0	V	0	1	0	1	0	1
rhp51	SPAC644.14c	RecA family recombinase Rhp51	127	V	0.0172281	16	0.00296095	59	0.00404974	41	0.00350315	16
rpp101	SPAC644.15	60S acidic ribosomal protein Rpp1-1	0	V	0	1	4.07865e-05	71	0.00013984	50	3.78e-08	41
mrpl9	SPAC644.17c	mitochondrial ribosomal protein subunit L9	0	E			0.00169644	92	0.000208701	50	0.00196062	25
bet3	SPAC644.18c	TRAPP complex subunit Bet3	0	E			0.00128636	15	1.3047e-06	5	0	1
swi6	SPAC664.01c	chromodomain protein Swi6	147	V	0.0299715	28	0.00279302	46	0.00739926	39	0.0168973	14
arp8	SPAC664.02c	actin-like protein Arp8	1	V			3.37187e-05	13	0	12	1.26234e-07	8
rps1602	SPAC664.04c	40S ribosomal protein S16	0	V	0	1	0.000247987	154	0.000301105	36	0	2
rpl13	SPAC664.05	60S ribosomal protein L13	0	E	0.000271298	3	0.00461903	224	0.00203015	134	7.86315e-07	42
rlp7	SPAC664.06	ribosomal protein L7-like Rlp7 involved in ribosome biogenesis	3	E	0	1	5.66214e-05	106	1.202e-05	14
rad9	SPAC664.07c	checkpoint clamp complex protein Rad9	120	V	0.00570072	9	0.000493755	24	0.0012544	22	0.000313582	7
SPAC664.08c	SPAC664.08c	traub family protein involved in ribosome biogenesis	0	E			4.38296e-07	48	0	7
ggt1	SPAC664.09	gamma-glutamyltranspeptidase Ggt1	0	E			2.6955e-05	14	0.000108632	13	0.00156429	7
klp2	SPAC664.10	kinesin-like protein Klp2	15	V			1.93586e-05	47	4.72507e-05	47	0.00147466	12
ssc1	SPAC664.11	mitochondrial heat shock protein Hsp70	16	E	0	1	0.000913721	18	0.00133706	6	1.242e-05	2
amt2	SPAC664.14	ammonium transporter Amt2	1	V	0	1	0.000586839	3	0.00070506	3	0	1
caf4	SPAC664.15	CCR4-Not complex subunit Caf4/Mdv1	3	V	0.00108224	4	0.000484693	8	0.00168986	5	4.32e-06	4
mis14	SPAC688.02c	kinetochore protein Mis14	1	E	0	3	0.000253516	62	0.000398299	62	5.34894e-05	6
SPAC688.03c	SPAC688.03c	human AMMECR1 homolog	0	V			1.59515e-05	5	0	1	0	1
slx4	SPAC688.06c	structure-specific endonuclease subunit	2	V	0	1	0	3	0	3	0	1
srb8	SPAC688.08	mediator complex subunit Srb8	4	V	0	2	0	19	0	19	0	4
SPAC688.09	SPAC688.09	mitochondrial pyrimidine nucletide transporter	0	E	0	1	0	1	0	1
rev3	SPAC688.10	DNA polymerase zeta catalytic subunit Rev3	0	V			0.00111329	31	0.000757725	9	0	1
end4	SPAC688.11	Huntingtin-interacting protein homolog	6	E	0	1	0.00363135	28	0.00365401	8	4.32e-06	2
scn1	SPAC688.13	TatD DNase family Scn1	3	V			0	1	0	1	0	1
set13	SPAC688.14	ribosome L32 lysine methyltransferase Set13	1	V	0	1	0	1	0	1	0	1
SPAC694.04c	SPAC694.04c	conserved eukaryotic protein	0	V			0.00216076	131	0.00322653	9
rps2502	SPAC694.05c	40S ribosomal protein S25	2	V	0.000271298	3	3.57411e-05	115	3.42537e-06	6
mrc1	SPAC694.06c	mediator of replication checkpoint 1	22	V	0.00260242	8	5.04363e-05	13	0.000105631	12	0	2
mus7	SPAC6B12.02c	DNA repair protein Mus7/Mms22	5	V			3.69414e-05	14	9.43169e-05	13	0	3
ies2	SPAC6B12.05c	Ino80 complex subunit Ies2	1	V			0	5	0	5
mug185	SPAC6B12.08	Co-chaperone for ATPase activity	0	V	0	1	0	1	0	1
trm10	SPAC6B12.09	tRNA m	0	V			0.000106601	31	2.14375e-07	2
spp1	SPAC6B12.10c	DNA primase catalytic subunit Spp1	5	E	2.32894e-05	2	0.00147538	60	0.00224635	44	0.0609463	30
drc1	SPAC6B12.11	DNA replication checkpoint protein Drc1	11	E	0.000323186	2	6.37802e-05	9	1.77473e-06	2
tom70	SPAC6B12.12	mitochondrial TOM complex subunit Tom70	0	V	0.0011236	3	0.000708474	13	0.00070506	4	0	1
SPAC6B12.13	SPAC6B12.13	protein phosphatase inhibitor	0	E			0	1	0	1
cpc2	SPAC6B12.15	RACK1 ortholog Cpc2	10	V	0.0119568	9	0.0061876	209	0.00768911	56	0.0400931	8
cit1	SPAC6C3.04	citrate synthase Cit1	0	V	0	1	0.00117542	70	0.00227137	36	0.00235338	7
SPAC6C3.06c	SPAC6C3.06c	P-type ATPase, calcium transporting	0	V	0	1	9.96453e-05	6	0	1
SPAC6C3.08	SPAC6C3.08	proteasome regulatory particle, gankyrin	0	V	0	2	0.000983149	27	0.00140986	4	0	2
rst2	SPAC6F12.02	transcription factor Rst2	8	V			9.4871e-06	3	3.48856e-06	2
fsv1	SPAC6F12.03c	SNARE Fsv1	1	V	0	1	0	4	0	4	0	1
SPAC6F12.04	SPAC6F12.04	COPI-coated vesicle associated protein	0	V	0	1	1.89884e-05	4	0	1
tnr3	SPAC6F12.05c	thiamine diphosphokinase Tnr3	5	E			7.74026e-05	5	0	1
SPAC6F12.06	SPAC6F12.06	Rho GDP dissociation inhibitor Rdi1	0	V			0.000397993	9	0	5	0	5
tom20	SPAC6F12.07	mitochondrial TOM complex subunit Tom20	1	E			5.40929e-05	13	8.39414e-05	5	0	1
rdp1	SPAC6F12.09	RNA-directed RNA polymerase Rdp1	17	V	7.33298e-05	4	1.65175e-05	6	4.94948e-05	6	0	2
ade3	SPAC6F12.10c	phosphoribosylformylglycinamidine synthase Ade3	4	V	0	1	0.00100495	35	4.58266e-05	9	0	3
sfc1	SPAC6F12.11c	transcription factor TFIIIC complex A box associated subunit Sfc1	0	E	0	2	0.000376835	16	0.000532885	16	0	2
par2	SPAC6F12.12	protein phosphatase regulatory subunit Par2	3	V	0	1	7.28878e-06	5	1.2711e-05	5	0	1
fps1	SPAC6F12.13c	geranyltranstransferase Fps1	2	E	0.00154053	4	1.05283e-05	8	0.000307105	5	0.00390437	5
cut23	SPAC6F12.14	anaphase-promoting complex subunit Apc8	4	E	0.000954914	6	0.000956996	30	0.000282282	23	0.000898095	12
cut9	SPAC6F12.15c	anaphase-promoting complex subunit Cut9	20	E	0.00291005	15	0.00457981	49	0.00589909	38	0.00940501	18
mtr4	SPAC6F12.16c	ATP-dependent RNA helicase, TRAMP complex subunit Mtr4	1	E	0	3	7.75117e-05	20	0	2	0	2
rna14	SPAC6F12.17	mRNA cleavage and polyadenylation specificity factor complex subunit Rna14	1	E			0.000701095	16	0	1
pof5	SPAC6F6.02c	F-box protein Pof5	0	V	0	1	0	2	0	1	0	1
SPAC6F6.03c	SPAC6F6.03c	ribosome export GTPase	0	V	0.000585867	3	0.000498691	155	1.26802e-05	19	0.000418018	4
ost2	SPAC6F6.05	oligosaccharyltransferase epsilon subunit Ost2	0	E			0.000547986	21	5.8092e-06	7	0	4
rax2	SPAC6F6.06c	cell polarity factor Rax2	1	V			0	2	0	1
rps13	SPAC6F6.07c	40S ribosomal protein S13	0	E	0.00221799	7	0.00586328	284	0.0109711	181	0.0373262	74
cdc16	SPAC6F6.08c	two-component GAP Cdc16	33	E	7.87526e-05	4	0.00263959	37	0.00339019	22	0.00861783	12
arc2	SPAC6F6.10c	ARP2/3 actin-organizing complex subunit Arc34	0	E	0	1	0.00106905	24	6.16376e-05	9	6.84001e-06	7
SPAC6F6.11c	SPAC6F6.11c	pyridoxine-pyridoxal-pyridoxamine kinase	0	V			5.42035e-05	7	0.000226805	4	0	3
ypt5	SPAC6F6.15	GTPase Ypt5	3	E	0	1	1.79175e-05	2	0	1
tpz1	SPAC6F6.16c	Tppl homolog Tpz1	5	E	0	2	0	2	0	2	0	2
rif1	SPAC6F6.17	telomere length regulator protein Rif1	3	V	0	1	6.88897e-05	4	6.04694e-06	3	0	2
tea3	SPAC6G10.02c	cell end marker Tea3	4	V	0	2	4.96559e-05	5	1.8875e-05	3	0	2
SPAC6G10.04c	SPAC6G10.04c	20S proteasome component alpha 6 subunit Pre5	0	E	7.54893e-07	3	2.07342e-05	30	3.69537e-06	16	2.31429e-07	6
SPAC6G10.07	SPAC6G10.07	nuclear cap-binding complex large subunit	0	E	0	1	0.000312706	51	0.0014459	51	0	1
idp1	SPAC6G10.08	isocitrate dehydrogenase Idp1	0	V			0.000452594	42	9.66519e-05	17	2.295e-06	5
SPAC6G10.09	SPAC6G10.09	alpha glucosidase I Gls1	0	E			0.00074304	15	0.00043797	2	0	1
ace2	SPAC6G10.12c	transcription factor Ace2	17	V	0	1	8.96409e-05	3	0	2
nop9	SPAC6G9.02c	RNA-binding protein Nop9	0	E			1.00492e-06	65	0	11
pcp1	SPAC6G9.06c	pericentrin Pcp1	7	E	0.00159505	4	0.000413569	12	0.00158691	11	0.00179024	3
arc4	SPAC6G9.07c	ARP2/3 actin-organizing complex subunit Arc4	0	E	0	1	0.000175341	14	2.01633e-05	8	0	6
ubp6	SPAC6G9.08	ubiquitin C-terminal hydrolase Ubp6	1	V	0.00158239	16	0.00338004	57	0.000247564	27	0.0018218	23
rpl2401	SPAC6G9.09c	60S ribosomal protein L24	0	V	0.000271298	3	4.50572e-05	140	7.41569e-08	15
sen1	SPAC6G9.10c	ATP-dependent 5' to 3' DNA/RNA helicase Sen1	1	V	0	1	0	1	0	1
syb1	SPAC6G9.11	SNAP receptor, synaptobrevin family	7	E	0.00787256	2	0.00304555	27	0.000770934	9	0.00256122	5
cfr1	SPAC6G9.12	Chs five related protein Cfr1	1	V			0.00144977	7	0	1
bqt1	SPAC6G9.13c	bouquet formation protein Bqt1	5	V	0.00539801	2	2.9562e-05	7	2.51646e-05	3	0	1
vma11	SPAC732.01	V-type ATPase V0 proteolipid subunit	0	E			0	6	0	5	0	2
SPAC732.02c	SPAC732.02c	fructose-2,6-bisphosphate 2-phosphatase activity	0	V			0	7	0	7	1.53316e-05	7
vps1	SPAC767.01c	dynamin family protein Vps1	3	V			0.00180003	16	0.00231318	6	0	1
sfp47	SPAC7D4.02c	Ubp4 interactor Sfp47	0	V	0	1	0	1	0	1	0	1
taf1	SPAC7D4.04	Taz1 interacting factor 1, autophagy protein	3	V	0	1	0	1	0	1
alg3	SPAC7D4.06c	dolichol-P-Man dependent alpha	1	V			0.000413317	17	0.000895631	9	0.0021285	3
trx1	SPAC7D4.07c	cytosolic thioredoxin Trx1	5	V	0	1	0.00166106	27	0.00647882	6	0.00765451	2
vma13	SPAC7D4.10	V-type ATPase V1 subunit H	0	E			0	13	0	13	0	11
rps2601	SPAC806.03c	40S ribosomal protein S26	0	V	0.000221594	2	6.52744e-05	134	3.42537e-06	10
SPAC806.06c	SPAC806.06c	nicotinamide mononucleotide	0	E			0.00159532	7	0.00281711	3	2.16e-06	2
ndk1	SPAC806.07	nucleoside diphosphate kinase Ndk1	1	V	0	1	0.00925326	158	0.0244524	67	0.0326723	16
mod21	SPAC806.08c	gamma tubulin complex subunit Mod21	1	V	0.000269741	5	7.16825e-05	7	0.000372543	7	0	5
cid13	SPAC821.04c	poly	4	V	0.00154045	6	3.70732e-05	5	9.70468e-05	2	0	1
SPAC821.05	SPAC821.05	translation initiation factor eIF3h	0	V	0.001303	4	0.000155588	41	0.000421032	37	0.000106731	31
spn2	SPAC821.06	septin Spn2	2	V	0.00324276	6	0.000677024	6	0.00281711	6	0	3
moc3	SPAC821.07c	transcription factor Moc3	3	V	0.00489222	23	0.00164843	36	1.36744e-06	3	0.000854821	2
slp1	SPAC821.08c	sleepy homolog Slp1	36	E	0.00116621	6	0.000947985	66	0.00339204	65	0.00412298	12
eng1	SPAC821.09	endo-1,3-beta-glucanase Eng1	8	V	0	2	0.000270812	10	0.000405899	5	0	1
sod1	SPAC821.10c	superoxide dismutase Sod1	10	V	3.19167e-06	2	0.00386436	43	0.0013984	6	0	2
pro1	SPAC821.11	gamma-glutamyl phosphate reductase Pro1	0	V	0	1	0.00242889	65	0.00400973	11	0.000859175	4
orb6	SPAC821.12	serine/threonine protein kinase Orb6	16	E	0.00174303	6	0.00016016	7	0.000435377	7	0	1
tlg2	SPAC823.05c	SNARE Tlg2	0	V	0	1	0.0012239	12	5.71294e-07	5	0	3
SPAC823.11	SPAC823.11	sphingosine-1-phosphate phosphatase	0	E			7.57092e-06	3	0	2	0	2
ptf1	SPAC823.14	phosphoric monoester hydrolase	0	V			0.000469548	21	0	2
ppa1	SPAC823.15	minor serine/threonine protein phosphatase Ppa1	7	V	0	2	7.74917e-06	5	1.56842e-06	3
SPAC824.04	SPAC824.04	WD repeat protein	0	V	0.00385256	12	1.55533e-05	12	0	11	0.00136453	10
tim14	SPAC824.06	TIM23 translocase complex subunit Tim14	0	V			9.62029e-05	13	0	4	0	2
SPAC824.07	SPAC824.07	hydroxyacylglutathione hydrolase	0	V			4.92743e-05	6	0	1	0	1
gda1	SPAC824.08	guanosine-diphosphatase Gda1	1	V			0.000450675	31	0	1	0	1
mel1	SPAC869.07c	alpha-galactosidase, melibiase	1	V			0.000526971	8	0.000924816	6	0	1
cat1	SPAC869.11	cationic amino acid transporter Cat1	1	V	0	1	2.94331e-05	2	0	1
alp7	SPAC890.02c	centrosomal transforming acidic coiled-coil	10	V	0.000876275	3	0.000485438	48	0.000663924	48	0.00784612	6
SPAC890.04c	SPAC890.04c	ribosome biogenesis protein Ytm1	0	E	0	1	0.00344707	215	0.000332597	54	0	8
SPAC890.05	SPAC890.05	ribosome biogenesis protein, G-pathc domain, PINX1 family	0	V			2.87184e-05	110	0	1
rmt1	SPAC890.07c	type I protein arginine N-methyltransferase Rmt1	2	V			0.000475941	129	0.00070587	5
rpl31	SPAC890.08	60S ribosomal protein L31	0	E	0.000271298	3	0.000598324	184	0.00125477	114	2.48944e-05	43
cgs1	SPAC8C9.03	cAMP-dependent protein kinase regulatory subunit Cgs1	9	V	0.00216315	2	0.000780968	18	0.000934144	13	0	1
SPAC8C9.05	SPAC8C9.05	D-Tyr-tRNA deacylase	0	V			0.00129651	44	1.90603e-05	3
SPAC8C9.07	SPAC8C9.07	rRNA processing protein Fyv7	0	V	0	1	0	1	0	1
rps5	SPAC8C9.08	40S ribosomal protein S5	0	V	0	1	0.000696469	180	0.000112954	46	1.57959e-05	6
prr1	SPAC8C9.14	transcription factor Prr1	10	V	0	1	0.000262851	5	0.00015638	3
tif225	SPAC8C9.15c	translation initiation factor eIF2B epsilon subunit	0	E			5.58846e-05	29	8.83693e-07	8	0	7
spc34	SPAC8C9.17c	DASH complex subunit Spc34	1	V	0	3	1.64815e-05	47	0	45	0.000215405	11
SPAC8E11.01c	SPAC8E11.01c	beta-fructofuranosidase	0	V			7.63414e-06	6	1.42402e-05	6
rad24	SPAC8E11.02c	14-3-3 protein Rad24	49	V	0.0591733	34	0.00418759	33	0.00752595	19	0.00200461	5
dmc1	SPAC8E11.03c	RecA family ATPase Dmc1	22	V	7.01699e-06	5	0.000314536	15	5.40477e-05	11	5.72192e-06	3
alp31	SPAC8E11.07c	tubulin specific chaperone cofactor A, Alp31	1	V			3.15121e-05	3	2.85829e-06	2
SPAC8E11.10	SPAC8E11.10	sorbose reductase	0	V			4.39008e-07	4	0	2
dph3	SPAC8F11.02c	diphthamide biosynthesis protein Dph3	0	V			0.00021103	17	4.02203e-05	4
msh3	SPAC8F11.03	MutS protein homolog 3	20	V			1.97635e-05	11	3.51155e-06	5	4.04342e-07	4
SPAC8F11.04	SPAC8F11.04	U3 snoRNP-associated protein Cic1/Utp30 family	0	E	0.000221594	3	0	1	0	1
cdc24	SPAC8F11.07c	DNA replication protein Cdc24	16	E	0.00137449	3	0.000477313	18	0.00102068	16	0	2
pvg1	SPAC8F11.10c	pyruvyltransferase Pvg1	1	V	0	1	0.00234527	4	0	1
brr2	SPAC9.03c	U5 snRNP complex subunit Brr2	2	E	3.74923e-05	8	0.000351642	49	0.000357469	38	0.000533813	20
SPAC9.06c	SPAC9.06c	5'-methylthioribulose-1-phosphate dehydratase, adducin	0	V			0	2	0	2
met26	SPAC9.09	homocysteine methyltransferase Met26	1	V	0	1	0.00391864	51	0.00728691	15	0.0112225	10
thi9	SPAC9.10	thiamine transporter Thi9	1	V			0	1	0	1	0	1
atp12	SPAC9.12c	F1-ATPase chaperone Atp12	3	V			0.000186049	8	9.05084e-07	3
cwf16	SPAC9.13c	splicing factor	0	V	0	3	0	6	0	1	0	1
SPAC922.03	SPAC922.03	1-aminocyclopropane-1-carboxylate deaminase	0	V			6.26925e-05	8	0	3
SPAC922.05c	SPAC922.05c	membrane transporter	0	V	0	1	0	1	0	1
SPAC922.06	SPAC922.06	3-oxoacyl-[acyl-carrier-protein]reductase	0	V			4.39008e-07	4	0	2
SPAC922.07c	SPAC922.07c	aldehyde dehydrogenase	0	V			8.22111e-05	14	0.000107848	14	0.00263253	10
rlc1	SPAC926.03	myosin II regulatory light chain Rlc1	9	V	4.26384e-05	5	1.73108e-07	5	0	3	0	3
hsp90	SPAC926.04c	Hsp90 chaperone	22	E	0.00575111	9	0.0273445	129	0.0113778	24	0.0080752	8
SPAC926.08c	SPAC926.08c	Brix domain protein Rpf2	0	E	0	2	0.00179887	239	0.000731962	64	0.000873153	12
fas1	SPAC926.09c	fatty acid synthase beta subunit Fas1	1	V	0	1	0.000633136	19	0.00145307	9	0.000854821	2
sec17	SPAC959.02	alpha SNAP	0	E	0	1	0.000991613	22	0.000820598	9	0.000854821	2
SPAC959.03c	SPAC959.03c	U3 snoRNP-associated protein Utp7	0	E			0.00027172	125	1.85626e-05	38	0.000169137	16
omh6	SPAC959.04c	alpha-1,2-mannosyltransferase Omh6	1	V			0	9	5.45346e-05	9
rps403	SPAC959.07	40S ribosomal protein S4	0	V	0	1	9.70753e-05	127	0.000104651	40	0	2
rpl2102	SPAC959.08	60S ribosomal protein L21	0	V	0	2	6.20689e-05	130	0	10
apc5	SPAC959.09c	anaphase-promoting complex subunit Apc5	2	E	0	3	0.000121198	21	8.57958e-05	20	0	2
SPAC977.12	SPAC977.12	L-asparaginase	0	V			1.27949e-05	17	6.42632e-05	16
SPAC977.14c	SPAC977.14c	aldo/keto reductase, unknown biological role	0	V	0	1	6.98076e-06	2	0	1
dak2	SPAC977.16c	dihydroxyacetone kinase Dak2	1	V			7.85723e-05	10	0.000121784	8	0.00042714	2
SPAC977.17	SPAC977.17	MIP water channel	2	V			4.185e-05	4	0	1
leu2	SPAC9E9.03	3-isopropylmalate dehydratase Leu2	25	V			0.0014444	50	0.00114721	19	0.00110971	6
SPAC9E9.04	SPAC9E9.04	bcap family homolog	0	V	0	1	0	1	0	1
SPAC9E9.06c	SPAC9E9.06c	threonine synthase	0	E			0.00101447	48	8.10958e-05	8	0.00362086	6
ypt2	SPAC9E9.07c	GTPase Ypt2	5	E	0	1	8.34897e-05	4	5.74003e-05	2	0	1
rad26	SPAC9E9.08	ATRIP, ATR checkpoint kinase regulatory subunit Rad26	57	V	0.00107453	3	0.00030869	21	0.000882068	19	0	2
SPAC9E9.09c	SPAC9E9.09c	aldehyde dehydrogenase	0	V	0	1	0.00188401	28	0.00948104	28	0.00519375	11
cbh1	SPAC9E9.10c	CENP-B homolog Cbh1	6	V	0.000201469	2	2.32516e-06	3	0	2	0	1
plr1	SPAC9E9.11	pyridoxal reductase Plr1	1	V			4.34953e-08	3	6.5235e-08	3
wos2	SPAC9E9.13	p23 homolog, predicted co-chaperone Wos2	4	V	0.000230724	4	0.000356417	19	4.92887e-05	6	0	2
vps24	SPAC9E9.14	ESCRT III complex subunit Vps24	0	V			0.000582275	10	0	2	0	1
wis4	SPAC9G1.02	MAP kinase kinase kinase Wis4	16	V	0.000180546	3	2.0812e-05	8	1.24414e-05	5	3.6e-07	3
rpl3001	SPAC9G1.03c	60S ribosomal protein L30	0	V	0.00106156	3	0.000290244	150	0.000637761	26
SPAC9G1.05	SPAC9G1.05	actin cortical patch component Aip1	0	V	0	1	1.72404e-06	8	0	1
sid1	SPAC9G1.09	PAK-related GC kinase Sid1	16	E	0.000812428	4	0.000146762	11	0.00105832	11	0.000280006	4
spn4	SPAC9G1.11c	septin Spn4	2	V	0.00323749	6	2.34139e-05	4	0.000330885	4	0	3
cpd1	SPAC9G1.12	tRNA	0	V			0.000685132	140	0.00096968	9
swc4	SPAC9G1.13c	Swr1 complex subunit Swc4	0	E	0.000120769	3	4.42053e-05	23	0.000167787	23	0.00112198	17
rpb7	SPACUNK4.06c	DNA-directed RNA polymerase complex II subunit Rpb7	16	E	0.0160509	17	0.00286379	119	0.00545324	90	0.021136	46
SPACUNK4.13c	SPACUNK4.13c	mitochondrial NTPase Ylf2	0	V			2.26395e-06	7	0	1
SPACUNK4.16c	SPACUNK4.16c	alpha,alpha-trehalose-phosphate synthase	0	V			2.69519e-05	9	0.000142971	8	1.70217e-05	4
SPAP11E10.01	SPAP11E10.01	ornithine cyclodeaminase family	0	V			0.000209802	15	0.000120932	7	0	4
bos1	SPAP14E8.03	SNARE Bos1	0	E			0.000238781	16	0	4	0	3
mrp7	SPAP19A11.05c	mitochondrial ribosomal protein subunit L27	0	E			0.000854323	70	0.000649013	22	1.18605e-05	7
SPAP27G11.03	SPAP27G11.03	D123 family protein	0	E			0.000183623	7	0	1
tad3	SPAP27G11.04c	tRNA specific adenosine deaminase subunit Tad3	1	E			0	1	0	1	0	1
vps41	SPAP27G11.05c	HOPS complex subunit Vps41	2	V	0	1	0	1	0	1
vas2	SPAP27G11.06c	AP-1 adaptor complex sigma subunit Aps1	6	V			0	4	0	3	0	3
SPAP27G11.07c	SPAP27G11.07c	serine/threonine protein kinase	0	E			0.000541699	13	3.83966e-05	3	0	1
SPAP27G11.09c	SPAP27G11.09c	GTP cyclohydrolase	0	E			0.000833439	48	0.00221374	34	0	3
nup184	SPAP27G11.10c	nucleoporin Nup184	3	V			4.28107e-05	6	0.000429137	6	0	1
nop10	SPAP27G11.13c	snoRNP pseudouridylase box H/ACA snoRNP complex protein	0	E			0.000848548	56	0	5	0	3
slx1	SPAP27G11.15	structure-specific endonuclease catalytic subunit	4	V	0	1	6.49868e-05	12	4.70811e-05	5	0.00170893	3
gua2	SPAP7G5.02c	GMP synthase [glutamine-hydrolyzing] Gua2	0	E			0.0124923	290	0.0100823	48	0.011698	6
lys1	SPAP7G5.04c	aminoadipate-semialdehyde dehydrogenase	9	V			6.62143e-05	15	1.42498e-05	2	0	1
rpl1002	SPAP7G5.05	60S ribosomal protein L10	1	V	0	1	4.37787e-05	105	5.08785e-06	11	0	1
per1	SPAP7G5.06	plasma membrane amino acid permease Per1	1	V	0	1	0	1	0	1
hsp9	SPAP8A3.04c	heat shock protein Hsp9	10	V			0.000157059	5	0	1
SPAP8A3.06	SPAP8A3.06	U2AF small subunit, U2AF-23	0	E	4.08247e-06	3	0.000174513	4	2.34976e-05	3	0	1
SPAP8A3.07c	SPAP8A3.07c	phospho-2-dehydro-3-deoxyheptonate aldolase	0	V			2.33088e-07	5	0	1	0	1
cdc4	SPAP8A3.08	myosin II light chain	36	E	0.00124122	8	0.00024331	13	0.00142664	12	0	3
paa1	SPAP8A3.09c	protein phosphatase regulatory subunit Paa1	1	E	0	2	0.00343131	21	0.000722196	5	6.84001e-06	2
SPAP8A3.11c	SPAP8A3.11c	mitochondrial GTPase Mtg2	0	E			0.000301047	50	9.79365e-05	6	0	1
yip12	SPAPB17E12.02	SMN family protein Yip12	1	V			0	1	0	1
csn2	SPAPB17E12.04c	COP9/signalosome complex subunit Csn2	5	V	9.47567e-05	4	0.00189906	29	0	7	0.000192982	5
rpl3703	SPAPB17E12.05	60S ribosomal protein L37	0	V	0.000221594	2	0.00019403	128	0.000272471	14
sen2	SPAPB17E12.07c	tRNA-splicing endonuclease subunit catalytic subunit Sen2	0	E			1.73981e-07	2	0	1
SPAPB17E12.11	SPAPB17E12.11	oligosaccharyltransferase gamma subunit Ost3	0	E	0	1	0.000159307	7	0.00140258	6	0	4
rpl1802	SPAPB17E12.13	60S ribosomal protein L18	0	V	0.000271298	3	0.000269966	161	0.000454284	48
SPAPB17E12.14c	SPAPB17E12.14c	6-phosphofructo-2-kinase	0	V			4.29213e-07	8	2.97735e-06	8	3.02721e-05	8
ppk18	SPAPB18E9.02c	serine/threonine protein kinase Ppk18	0	V			0	1	0	1
cwp1	SPAPB1A10.04c	geranylgeranyltransferase I alpha subunit Cwp1	1	E	0.00108224	2	1.64516e-05	3	1.14714e-05	2	0.000334392	2
SPAPB1A10.06c	SPAPB1A10.06c	ATP-dependent RNA helicase Dhr1	0	E			3.66939e-06	71	0	14
ase1	SPAPB1A10.09	antiparallel microtubule cross-linking factor Ase1	17	V	0.00139396	5	0.000371877	13	0.000863193	12	0.00100202	4
ypt71	SPAPB1A10.10c	GTPase Ypt71	1	V			2.39015e-05	4	4.60321e-05	3
mse1	SPAPB1A10.11c	mitochondrial glutamyl-tRNA synthetase Mse1	1	E	8.08348e-06	3	0.0015576	62	0.000766046	12
SPAPB1A10.14	SPAPB1A10.14	F-box protein	0	V			0	3	0	3
SPAPB1A11.03	SPAPB1A11.03	cytochrome b2	0	V			0.000294787	17	0	9	1.05417e-06	5
mcl1	SPAPB1E7.02c	DNA polymerase alpha accessory factor Mcl1	5	V	0.000979162	4	8.78733e-05	13	0.000189464	13	0.000230365	4
rpc82	SPAPB1E7.03	DNA-directed RNA polymerase III complex subunit Rpc82	1	E			1.602e-05	15	5.38248e-06	8	0	1
eme1	SPAPB1E7.06c	Holliday junction resolvase subunit Eme1	32	V	0	1	1.03368e-05	5	2.93158e-05	4	0	1
glt1	SPAPB1E7.07	glutamate synthase Glt1	1	V			0.000840696	49	0.00151051	28	0.000804688	7
ogm2	SPAPB1E7.09	protein O-mannosyltransferase Ogm2	2	V	0	1	0	2	0	2	0	2
rpc17	SPAPB1E7.10	DNA-directed RNA polymerase III complex subunit Rpc17	4	E	0	1	7.31321e-07	10	0	1
rps602	SPAPB1E7.12	40S ribosomal protein S6	3	V	0.000992274	3	0.000118924	151	9.15606e-05	23	0	1
SPAPB24D3.03	SPAPB24D3.03	agmatinase	0	V			1.25085e-06	3	0	1
mag1	SPAPB24D3.04c	DNA-3-methyladenine glycosylase Mag1	6	V			9.75062e-06	9	3.94473e-05	8	0	1
agl1	SPAPB24D3.10c	alpha-glucosidase Agl1	1	V			0.00120327	10	0.00146086	10	0	2
gpi12	SPAPB2B4.01c	pig-L, N-acetylglucosaminylphosphatidyl inositoldeacetylase	0	E			3.91849e-05	7	0.000200044	7
grx5	SPAPB2B4.02	monothiol glutaredoxin Grx5	5	V			0.000659733	23	0.00150311	2	0	1
cig2	SPAPB2B4.03	G1/S-specific B-type cyclin Cig2	32	V	0.00394771	6	0.000871628	38	0.00190224	31	0.00371944	14
SPAPB2B4.04c	SPAPB2B4.04c	vacuolar calcium transporting P-type ATPase P2 type, Pmc1	3	V	0.00787256	2	0.000652555	5	0.000270654	2
vma5	SPAPB2B4.05	V-type ATPase V1 subunit C	0	E			0	13	0	13	7.86858e-06	12
rpn502	SPAPB8E5.02c	19S proteasome regulatory subunit Rpn502	3	V	0	1	0.000130895	25	0.000212957	5	0.00545907	2
rpl302	SPAPB8E5.06c	60S ribosomal protein L3	2	V	0	1	0.000139162	138	0.000138689	53	5.32861e-05	8
SPAPB8E5.07c	SPAPB8E5.07c	ribosome biogenesis protein Rrp12	0	E			2.39983e-05	118	2.71229e-05	29
rvb1	SPAPB8E5.09	AAA family ATPase Rvb1	0	E	0.00235473	5	0.00324068	62	0.00190975	28	0.00107218	18
vps17	SPAPJ696.01c	retromer complex subunit Vps17	0	V	0	1	0.00103612	9	0.00376097	3
SPAPJ696.02	SPAPJ696.02	actin cortical patch component Lsb4	0	V			5.29653e-05	7	0	1
rps002	SPAPJ698.02c	40S ribosomal protein S0B	2	V	0.00145203	2	0.000742013	182	0.00157746	77	0.000602077	59
prp12	SPAPJ698.03c	U2 snRNP-associated protein Sap130	2	E	0.00313449	9	0.00162765	50	0.00638153	42	0.00112975	23
sin1	SPAPYUG7.02c	stress activated MAP kinase interacting protein Sin1	6	V	0.00151607	5	0.000169274	16	0.000230657	10	1.422e-06	5
mid2	SPAPYUG7.03c	medial ring protein Mid2	7	V	0	1	1.42246e-05	4	0	2	0	1
rpb9	SPAPYUG7.04c	DNA-directed RNA polymerase II complex subunit Rpb9	7	V	0	4	0.00160033	109	0.0019788	85	0.0147505	43
SPAPYUG7.05	SPAPYUG7.05	delta-1-pyrroline-5-carboxylate reductase	0	E			0.00149817	60	0.000584074	9	4.35405e-06	3
syn1	SPAPYUK71.03c	synaptotagmin family C2 domain protein, Syn1	2	V	0	1	0	1	0	1
mph1	SPBC106.01	dual specificity protein kinase Mph1	5	V			0.000137635	13	0.000188711	8	0	2
srx1	SPBC106.02c	sulfiredoxin	5	V	0	1	1.22816e-05	4	0	1	0	1
SPBC106.03	SPBC106.03	DUF1776 family protein	0	V	0	1	0	1	0	1
ada1	SPBC106.04	adenosine deaminase Ada1	1	V	0.00807231	22	1.0627e-05	9	7.26183e-05	8	0.000263772	5
cct4	SPBC106.06	chaperonin-containing T-complex delta subunit Cct4	0	E	0.00197577	4	0.000520457	27	0.00138368	18	5.70641e-05	14
cut4	SPBC106.09	anaphase-promoting complex subunit Apc1	8	E	0.00196733	7	0.00112978	34	0.00530276	32	0.000826869	11
pka1	SPBC106.10	cAMP-dependent protein kinase catalytic subunit Pka1	32	V	0.00108224	2	0.00184608	20	0.0029807	15	0.00216493	3
plg7	SPBC106.11c	phospholipase A2, PAF family homolog	1	V			0	1	0	1
sda1	SPBC106.14c	SDA1 family protein	0	E			0.000847872	194	5.32848e-05	28	0	2
idi1	SPBC106.15	isopentenyl-diphosphate delta-isomerase Idi1	1	E			0.000119171	10	0	3	0	3
pre6	SPBC106.16	20S proteasome component alpha 4 Pre6	1	V	0	2	9.9922e-05	31	9.9304e-05	16	6.40286e-07	7
cys2	SPBC106.17c	homoserine O-acetyltransferase	1	V			3.11761e-05	14	0	4	7.21565e-06	3
rpl2501	SPBC106.18	60S ribosomal protein L25	1	E	0.000271298	3	9.8741e-05	147	5.05577e-06	45	1.0125e-07	6
exo70	SPBC106.20	exocyst complex subunit Exo70	2	V	0.00109499	5	0.000435211	10	0.00206716	9	1.62e-06	4
lys4	SPBC1105.02c	homocitrate synthase	11	V	0.000466889	4	0.00216874	41	0.00481943	19	0.00170856	3
mrpl16	SPBC1105.03c	mitochondrial ribosomal protein subunit L16	0	E			0.000804357	80	0.000458577	52	0.000120626	22
cbp1	SPBC1105.04c	CENP-B homolog	28	V	0.00325714	8	0.000660035	10	0.0011171	9	5.40001e-07	2
exg1	SPBC1105.05	glucan 1,6-beta-glucosidase Exg1	3	V			0.000391029	12	0.000601009	10	0	1
pmc4	SPBC1105.06	mediator complex subunit Pmc4	2	E	0	1	2.36992e-05	20	0	19	0.000211698	7
SPBC1105.08	SPBC1105.08	EMP70 family	0	V	0	1	0	1	0	1
rav1	SPBC1105.10	RAVE complex subunit Rav1	1	V	0	1	3.58914e-05	3	0.00140986	3	0	1
hhf3	SPBC1105.12	histone H4 h4.3	2	V	0.000285905	3	1.63309e-06	5	0	1
cnp1	SPBC1105.17	centromere-specific histone H3 CENP-A	31	E	0.000889409	3	0.00252187	35	0.0113905	34	0.0031327	11
rrp46	SPBC115.01c	exosome subunit Rrp46	0	E			1.69318e-05	15	0	8	0	8
SPBC115.02c	SPBC115.02c	AFG1 family mitochondrial ATPase	0	V			3.15453e-05	17	0	1
SPBC115.03	SPBC115.03	gfo/idh/mocA family oxidoreductase	0	V			1.06059e-05	2	0	1
rpn3	SPBC119.01	19S proteasome regulatory subunit Rpn3	3	E	1.10693e-05	4	0.00180052	48	6.85054e-05	19	0.000295789	9
ubc4	SPBC119.02	ubiquitin conjugating enzyme Ubc4	7	E	0	1	0.000159792	9	9.37756e-05	4
mei3	SPBC119.04	meiosis inducing protein Mei3	21	V	0	1	0.000231962	10	1.69305e-06	3	0	1
sco1	SPBC119.06	copper chaperone Sco1	1	V			0.000103807	13	3.30987e-05	5	3.15e-06	2
ppk19	SPBC119.07	serine/threonine protein kinase Ppk19	1	V			5.36203e-05	3	0.000365297	3
pmk1	SPBC119.08	MAP kinase Pmk1	32	V	0.00275995	5	0.00361914	35	0.00855169	25	0.00641776	7
asn1	SPBC119.10	asparagine synthetase	1	V			0.000515679	43	4.25679e-05	15	0.00049062	6
pac1	SPBC119.11c	double-strand-specific ribonuclease Pac1	23	E			0.000264375	16	0.00070506	3
prp31	SPBC119.13c	U4/U6 x U5 tri-snRNP complex subunit Prp31	3	E	0.000177959	4	0.00068354	34	5.37332e-05	5	0	1
rti1	SPBC119.14	Rad22 homolog Rti1	11	V	0.000214511	6	0.000175436	13	1.29329e-06	4	3.08455e-05	3
dea2	SPBC1198.02	adenine deaminase Dea2	0	E			0.00125228	100	1.07731e-05	4	0.000137293	3
SPBC1198.05	SPBC1198.05	guanylate kinase	0	E			0.00648304	119	0.0017209	14	0.00825068	6
slm5	SPBC1198.10c	mitochondrial asparagine-tRNA ligase Slm5	0	E			0.000518737	23	1.41395e-05	3	0	2
reb1	SPBC1198.11c	RNA polymerase I transcription termination factor Reb1	10	V	0	1	0.000487549	20	0.000752203	19	0	1
mfr1	SPBC1198.12	fizzy-related protein Mfr1	3	V	0.000970841	4	0.000113196	10	7.22974e-05	6	0	1
tfg2	SPBC1198.13c	transcription factor TFIIF complex beta subunit Tfg2	1	E	8.15774e-05	5	0.000328874	70	0.000424922	66	0.000668815	34
fbp1	SPBC1198.14c	fructose-1,6-bisphosphatase Fbp1	38	V	0	1	0.00509884	59	0.00325974	17	8.12274e-05	10
alg2	SPBC11B10.01	mannosyltransferase complex subunit Alg2	0	E			0.000574097	15	0	2	0.0004239	2
his3	SPBC11B10.02c	histidinol-phosphate aminotransferase imidazole acetol phosphate transaminase His3	22	V			0.00256305	73	0.00111733	20	0.0022325	6
mrps28	SPBC11B10.04c	mitochondrial ribosomal protein subunit S28	0	E			0.00111569	30	6.95377e-05	6
cdc2	SPBC11B10.09	cyclin-dependent protein kinase Cdk1/Cdc2	553	E	0.049629	29	0.00637427	84	0.0190198	83	0.106397	39
pht1	SPBC11B10.10c	histone H2A variant H2A.Z, Pht1	7	V	0.00972611	5	0.00228269	35	0.00482704	27	0.000759584	17
imp2	SPBC11C11.02	contractile ring protein Imp2	2	V	0.000319588	2	2.28372e-06	4	8.14893e-06	4
ndc80	SPBC11C11.03	spindle pole body protein Ndc80	14	E	0.000682808	7	0.00069534	52	5.11514e-05	48	0.000220663	9
alp1	SPBC11C11.04c	tubulin specific chaperone cofactor D, Alp1	11	E	0.000169165	2	0.000625171	7	0.000771251	7	0	1
rpl1801	SPBC11C11.07	60S ribosomal protein L18	0	V	0.00179222	6	0.000266083	160	0.000130944	39
srp1	SPBC11C11.08	SR family protein, human SRFS2 ortholog Srp1	7	V	0	2	3.17642e-06	3	5.67632e-05	3	0	1
rpl502	SPBC11C11.09c	60S ribosomal protein L5	0	V			4.57326e-05	122	5.02028e-06	43	9.29406e-08	9
SPBC11C11.10	SPBC11C11.10	tRNA pseudouridine synthase	0	V			0.000258273	32	9.37898e-06	3
fis1	SPBC11G11.01	mitochondrial fission protein Fis1	0	V	0.00216315	2	0.000171522	7	0	2	0	1
end3	SPBC11G11.02c	actin cortical patch component End3	1	V			0.000456719	15	0	1
mrt4	SPBC11G11.03	mRNA turnover and ribosome assembly protein Mrt4	0	V			0.00321806	266	0.00195672	67	0.0012616	10
trs20	SPBC11G11.04	TRAPP complex subunit Trs20	0	E			0.000323964	8	0	3
sme1	SPBC11G11.06c	Sm snRNP core protein Sme1	0	E	0.000156502	5	0.00271212	95	0.000434184	45	0.00101934	33
mtr10	SPBC11G11.07	karyopherin, nuclear import receptor Mtr10	0	E			0.000495965	39	0	33	6.94814e-05	11
shy1	SPBC1215.01	SURF-family protein Shy1	0	V			0.000167858	14	0.00260404	6
stt3	SPBC1271.02	oligosaccharyltransferase subunit Stt3	2	E			0.000906766	18	0.00230184	10	0.0034128	5
SPBC1271.04c	SPBC1271.04c	eIF-5A-deoxyhypusine synthase	0	E			0.000811419	62	0.00141271	5
mrpl8	SPBC1271.13	mitochondrial ribosomal protein subunit L8	0	E			0.00136892	94	0.00016779	43	0.00019188	24
SPBC1271.14	SPBC1271.14	glutamate N-acetyltransferase	0	V			0.00105217	59	0.000192352	23	4.32859e-05	5
SPBC1271.15c	SPBC1271.15c	mitochondrial translation initiation factor IF-2Mt	0	V			0.00132461	68	0.001427	11
chr4	SPBC1289.01c	1,3-beta-glucan synthase regulatory factor Chf3/Chr4	2	V			5.11728e-05	2	0	1
uap2	SPBC1289.02c	U2 snRNP-associated protein Uap2	1	E	0	2	0	2	0	2	0	1
spi1	SPBC1289.03c	Ran GTPase Spi1	17	E	0.0123918	8	0.000851039	21	0.00432969	12	0.0101167	5
pob1	SPBC1289.04c	Boi family protein	3	E	2.6592e-05	4	4.93857e-06	3	1.95307e-06	3	0	1
vma10	SPBC1289.05c	V-type ATPase V1 domain subunit G	0	E			3.68888e-05	14	0	13	0	11
rpc40	SPBC1289.07c	DNA-directed RNA polymerase I and III subunit Rpc40	4	E	0	1	0.00509755	248	0.0130652	63	0.000327829	16
uap1	SPBC1289.08	UDP-N-acetylglucosamine diphosphorylase Uap1/Qri1	0	V			0.00216386	9	0.00222651	4	5.40001e-07	2
tim21	SPBC1289.09	TIM23 translocase complex subunit Tim21	0	V			0	1	0	1	0	1
spf38	SPBC1289.11	splicing factor Spf38	0	V	4.19414e-05	9	5.43434e-05	37	0.000292773	37	0.00156554	24
SPBC1289.13c	SPBC1289.13c	alpha-1,2-galactosyltransferase	0	V			0.00108899	16	5.45346e-05	9	0	1
SPBC1289.15	SPBC1289.15	cell surface glycoprotein	0	V	0	1	0	1	0	1
cao2	SPBC1289.16c	copper amine oxidase-like protein Cao2	2	V			7.59643e-05	8	2.68858e-05	4
Tf2-11	SPBC1289.17	retrotransposable element	0	V	0	1	0	1	0	1
ste20	SPBC12C2.02c	Rictor homolog, Ste20	25	V	7.81965e-05	3	0.000210117	16	0.000554943	16	0	2
bzz1	SPBC12C2.05c	diacylglycerol binding protein Bzz1	1	V			5.91163e-05	7	0.000310866	5
SPBC12C2.07c	SPBC12C2.07c	spermidine synthase	0	V			0.00269358	38	0.00373045	10	0.00248222	5
dnm1	SPBC12C2.08	dynamin Dnm1	5	V	0	1	7.33151e-05	6	0.000422603	3	2.16e-06	2
pst1	SPBC12C2.10c	Clr6 histone deacetylase complex subunit Pst1	5	E	0	1	0.00219237	30	0	15	0.00156592	9
SPBC12C2.11	SPBC12C2.11	glutamine-fructose-6-phosphate transaminase	0	E			0.00183402	64	0.00181208	17	0.00470058	7
glo1	SPBC12C2.12c	glyoxalase I	3	V			0.00222144	31	0.00149286	6	5.40001e-07	2
sad1	SPBC12D12.01	spindle pole body protein Sad1	23	E	0.0437703	33	0.000427524	11	0.00329495	9	0	1
cdm1	SPBC12D12.02c	DNA polymerase delta subunit Cdm1	9	V	0	1	7.70155e-05	18	0.000264992	16	3.01716e-05	5
cct1	SPBC12D12.03	chaperonin-containing T-complex alpha subunit Cct1	1	E	0.00117978	3	0.000551872	29	0.00138368	18	0.00044929	16
pck2	SPBC12D12.04c	protein kinase C	27	V	0.0020912	6	0.00176892	19	0.00225715	16	8.47829e-05	3
srb11	SPBC12D12.06	cyclin CycC, Srb mediator subunit Srb11	2	V	0	2	4.93124e-05	20	0	19	0.000777277	10
trx2	SPBC12D12.07c	mitochondrial thioredoxin Trx2	6	V			4.15872e-05	14	5.37541e-06	3	0	1
ned8	SPBC12D12.08c	ubiquitin-like protein modifier Ned8	18	E	0.00689885	6	0.00221356	22	0.0061076	11	0.0037434	5
rev7	SPBC12D12.09	DNA polymerase zeta Rev7	1	V	0	1	0	2	0	2
SPBC1306.01c	SPBC1306.01c	mitochondrial translation elongation factor G	0	E			0.000938681	81	7.91978e-05	36	7.52803e-05	18
rev1	SPBC1347.01c	deoxycytidyl transferase Rev1	4	V	0	1	9.89934e-05	8	0.000229012	5	0	1
fkbp39	SPBC1347.02	FKBP-type peptidyl-prolyl cis-trans isomerase	0	V	0.000562184	2	2.93011e-05	17	0	1
meu14	SPBC1347.03	sporulation protein Meu14	5	V	0	1	0.00113635	7	0.0003524	4
SPBC1347.05c	SPBC1347.05c	DNAJ domain protein Scj1	0	E	0	1	6.95076e-05	11	0.000167032	2
cki1	SPBC1347.06c	serine/threonine protein kinase Cki1	7	V			0	1	0	1
rex2	SPBC1347.07	RNA exonuclease	0	V			0.000521217	19	0	1
cdc23	SPBC1347.10	MCM-associated protein Mcm10	14	E	0.00261937	14	0.000804933	32	0.000151552	30	1.36022e-06	17
sro1	SPBC1347.11	stress responsive orphan 1	1	V	0	1	2.76648e-06	2	0	1
SPBC1347.13c	SPBC1347.13c	ribose methyltransferase	0	V			0.000133554	24	0	1
SPBC13A2.01c	SPBC13A2.01c	nuclear cap-binding complex small subunit	0	E			0.00142912	67	0.0014459	51	0.000971292	27
SPBC13A2.03	SPBC13A2.03	phosphatidate cytidylyltransferase	0	E			8.22451e-05	8	0.000116377	6	0.0026632	3
SPBC13A2.04c	SPBC13A2.04c	PTR family peptide transporter	1	V	0	1	5.14783e-05	4	0	1
cwf22	SPBC13E7.01	splicing factor Cwf22	0	E			0	3	0	1	0	1
cwf24	SPBC13E7.02	zf-C3HC4 type	0	E	0	3	0	1	0	1	0	1
atp16	SPBC13E7.04	F1-ATPase delta subunit	0	V			0.000550362	48	7.62931e-05	13	0	4
gpi14	SPBC13E7.05	pig-M	0	E			2.90251e-05	7	0.000504756	7	5.40001e-07	2
vrp1	SPBC13E7.09	verprolin	2	V	0	2	1.93625e-06	3	0	2	0	1
brf1	SPBC13E7.10c	transcription factor TFIIIB complex subunit Brf1	3	E	0	1	0.000322799	33	0.000129949	15	0	11
nam9	SPBC13G1.01c	mitochondrial ribosomal protein subunit S4	0	E	0	1	0	1	0	1
SPBC13G1.02	SPBC13G1.02	mannose-1-phosphate guanyltransferase	0	V	0	1	4.88366e-06	10	4.53594e-05	9
SPBC13G1.05	SPBC13G1.05	ER protein folding protein	0	E	0	1	0	1	0	1
ash2	SPBC13G1.08c	Ash2-trithorax family protein	1	V	0.00147579	12	0.000452121	12	0.000369792	10	4.86e-06	10
SPBC13G1.09	SPBC13G1.09	bystin family U3 and U14 snoRNA associated protein	0	E			0.00191568	199	0.00140929	68	0.00144897	23
ykt6	SPBC13G1.11	SNARE Ykt6	1	E	0	1	0.00123013	24	0.00226201	16	0.0143883	4
did2	SPBC13G1.12	ESCRT III complex subunit Did2	0	V			0.000586839	6	2.23974e-06	4	5.40001e-07	2
tfb2	SPBC13G1.13	transcription factor TFIIH complex subunit Tfb2	1	V	3.95217e-06	4	0.00047542	67	0.00150737	64	0.00488117	28
med15	SPBC146.01	mediator complex subunit Med15	2	E	0	2	4.67505e-05	20	0.00143339	20	0	1
cut3	SPBC146.03c	condensin complex subunit Cut3	14	E	0.00904543	8	0.00203642	34	0.00220657	15	0	4
cwf25	SPBC146.05c	complexed with Cdc5 protein Cwf25	0	E	0	3	0	1	0	1	0	1
prp2	SPBC146.07	U2AF large subunit	13	E	0.00352205	12	0.00116787	10	0.00306648	8	0.00474529	5
lsd1	SPBC146.09c	histone demethylase SWIRM1	12	V	0.00251502	6	0.00177951	13	0.00256646	10	2.7e-07	3
coq6	SPBC146.12	monooxygenase Coq6	2	V			0.00019704	19	0.000177509	4	0	1
myo1	SPBC146.13c	myosin type I	13	V	0.0132848	20	0.00112543	19	0.000515618	9	4.32e-06	3
sec26	SPBC146.14c	coatomer beta subunit	0	E			0.00133429	28	0.0010704	10	4.05e-07	6
cut2	SPBC14C8.01c	securin, sister chromatid separation inhibitor	38	E	0.00124811	4	0.000254061	19	0.000866801	15	0.00295285	4
tim44	SPBC14C8.02	TIM23 translocase complex subunit Tim44	0	E			0.00034047	15	0.000235982	7	7.75801e-05	5
fma2	SPBC14C8.03	methionine aminopeptidase Fma2	0	V			5.37834e-06	6	0	1
SPBC14C8.04	SPBC14C8.04	acetolactate synthase regulatory unit	0	V			0.000663432	41	0.000441778	17	0.00073366	6
meu17	SPBC14C8.05c	glucan-alpha-1,4-glucosidase	0	V			0.000611395	4	0.00140986	4
arc1	SPBC14C8.06	ARP2/3 actin-organizing complex subunit Sop2	2	E	0	2	0.0001448	14	4.26449e-05	8	0.00241466	7
cdc18	SPBC14C8.07c	MCM loader	74	E	0.00735456	15	0.0010815	45	0.00253344	40	0.00517607	29
rpb8	SPBC14C8.12	DNA-directed RNA polymerase I, II and III subunit Rpb8	14	E	0	6	0.00606903	222	0.00515266	108	0.00803809	52
pol5	SPBC14C8.14c	DNA polymerase phi	1	E	0	1	0.000258437	13	0	1
spt8	SPBC14C8.17c	SAGA complex subunit Spt8	4	V	0	2	0.000426865	31	7.49244e-05	8	0	1
kap123	SPBC14F5.03c	karyopherin Kap123	0	V	0	1	0.00483129	140	0.00149661	36	4.33929e-07	10
pgk1	SPBC14F5.04c	phosphoglycerate kinase Pgk1	6	E	0.0183985	5	0.00946642	101	0.00505002	23	0.0028285	11
sam1	SPBC14F5.05c	S-adenosylmethionine synthetase	3	E	0	1	0.00459881	86	0.0101829	25	0.00295827	4
rli1	SPBC14F5.06	iron-sulfur ATPase involved in ribosome biogenesis Rli1	0	E			0.0046918	218	0.0010425	40	2.05905e-06	3
med7	SPBC14F5.08	mediator complex subunit Med7	2	E	0.00988835	24	0.000232031	24	0.000719101	20	0.00191901	17
ade8	SPBC14F5.09c	adenylosuccinate lyase Ade8	0	V			0.000776932	47	0.00189589	25	0.00902469	12
cbh2	SPBC14F5.12c	CENP-B homolog Cbh2	7	V	0	3	2.12329e-06	2	0	1	0	1
SPBC14F5.13c	SPBC14F5.13c	vacuolar membrane alkaline phosphatase	0	V			0.0013626	8	0	2	0	1
SPBC1539.01c	SPBC1539.01c	mitochondrial ribosomal protein subunit L15	0	E			0	1	0	1
SPBC1539.03c	SPBC1539.03c	argininosuccinate lyase	0	V			0.000198789	37	0.000994267	25	0.00296577	7
tts1	SPBC1539.04	tetra spanning protein 1, Tts1	0	V	0	1	1.49762e-05	3	0	2
SPBC1539.07c	SPBC1539.07c	glutathione-dependent formaldehyde dehydrogenase	0	V			7.45623e-06	8	1.49889e-05	7	0	2
trp1	SPBC1539.09c	anthranilate synthase component II	9	E			0.000636844	41	3.24086e-05	8	0.00130852	4
klp9	SPBC15D4.01c	kinesin-like protein Klp9	0	V			0	1	0	1
slm9	SPBC15D4.03	hira protein Slm9	7	V	0.0230707	43	0.000463968	10	0.000344611	6	0.00144981	4
gpt2	SPBC15D4.04	UDP-N-acetylglucosamine--dolichyl-phosphateN-acetylglucosaminephosphotransferase	7	E			0.000486286	16	0.000296471	9	1.368e-05	5
SPBC15D4.09c	SPBC15D4.09c	cystathionine gamma-synthase	0	V			1.9724e-05	13	0.000603632	13	0.000650446	7
amo1	SPBC15D4.10c	nuclear rim protein Amo1	1	V			0	33	0	33	0.000864818	4
taf73	SPBC15D4.14	transcription factor TFIID complex subunit Taf5-like	1	E	0.00018847	5	1.63588e-05	41	3.72797e-05	40	6.23144e-05	13
ppr1	SPBC1604.02c	mitochondrial PPR repeat protein Ppr1	4	V	0	1	0	1	0	1
pgi1	SPBC1604.05	glucose-6-phosphate isomerase	0	E			0.00329129	77	0.00283182	36	0.0367476	22
SPBC1604.06c	SPBC1604.06c	CBF/Mak21 family	0	E	0	1	0.00012506	160	3.02482e-06	35	2.33038e-07	13
atp4	SPBC1604.07	F0-ATPase subunit	0	V			1.97701e-05	23	5.24227e-06	13	0.0017091	3
imp1	SPBC1604.08c	importin alpha	3	V	0.000596365	2	0.000630009	43	0.00130584	36	0.000310938	13
SPBC1604.09c	SPBC1604.09c	exoribonuclease Rex4	0	V			0.000707665	124	8.15065e-06	9
srb7	SPBC1604.10	mediator complex subunit Srb7	2	E			0.000520013	26	0	19	0.000282845	9
atp17	SPBC1604.11	F0-ATPase subunit F	0	V			0.000122605	22	0	7	0	1
shk1	SPBC1604.14c	PAK-related kinase Shk1	30	E	0.00642051	10	0.00142253	23	0.00366072	22	0.0157612	10
gpi16	SPBC1604.15	pig-T	0	E			0	2	0	1	0	1
tti2	SPBC1604.17c	Tel2 interacting protein Tti2, predicted ASTRA complex subunit	0	E	0	2	0	6	0	6	0	1
SPBC1604.18c	SPBC1604.18c	ESCRT III complex subunit	0	V	0	1	0	1	0	1
tea2	SPBC1604.20c	kinesin-like protein Tea2	12	V	0.000164951	6	9.47571e-06	7	5.02121e-05	7	0	2
SPBC1652.02	SPBC1652.02	APC amino acid transporter	0	V	0	1	0	1	0	1
dpm3	SPBC1677.02	dolichol-phosphate mannosyltransferase subunit 3	1	E			8.70464e-05	17	0.00140217	17	0	2
SPBC1677.03c	SPBC1677.03c	mitochondrial threonine ammonia-lyase	0	E	0	1	0.00166652	56	0.00614779	18	0.0135788	8
SPBC1683.02	SPBC1683.02	adenine/adenosine deaminase family	0	V			2.94411e-06	5	0	3	0.000137293	3
SPBC1683.04	SPBC1683.04	glycosyl hydrolase family 3	0	V			9.08737e-05	9	5.20513e-05	8
SPBC1683.06c	SPBC1683.06c	uridine ribohydrolase	0	V			8.88385e-06	7	0.000208368	7	1.8e-07	3
mal1	SPBC1683.07	maltase alpha-glucosidase Mal1	2	V	0	1	0.00439282	18	0.00695881	10	0	1
ght4	SPBC1683.08	hexose transporter Ght4	1	V			0	1	0	1
pcl1	SPBC1683.10c	ferrous iron transporter Pcl1	1	V	0	1	0.000483883	11	0	1
SPBC1683.11c	SPBC1683.11c	isocitrate lyase	0	V			8.23683e-06	6	3.72772e-08	2	0	1
pmp1	SPBC1685.01	dual-specificity MAP kinase phosphatase Pmp1	7	V	0	2	2.43943e-05	7	6.94953e-05	7	0	2
rps1202	SPBC1685.02c	40S ribosomal protein S12	0	V			0.000139295	163	0.000151496	68	0.000485291	57
sec11	SPBC1685.03	signal peptidase subunit Sec11	1	E			0.000714281	14	1.71129e-05	2
cti6	SPBC1685.08	histone deacetylase complex subunit Cti6	0	V			1.4645e-05	19	1.65877e-05	19	3.6e-07	4
rps29	SPBC1685.09	40S ribosomal protein S29	0	V	0	1	0.000949583	185	0.00176216	132	0.00023854	61
rps27	SPBC1685.10	40S ribosomal protein S27	0	V	0.00065154	2	0.000765574	180	0.00140411	104	0.000432966	57
rlp1	SPBC1685.11	RecA family ATPase Rlp1	4	V	0.00324276	3	0	1	0	1
klp6	SPBC1685.15c	kinesin-like protein Klp6	14	V	0	3	0.000688416	52	0.00198797	51	0.000615915	16
spn3	SPBC16A3.01	septin Spn3	2	V	0.008621	5	0.00111299	4	0.00550903	4	0	3
rsm25	SPBC16A3.04	mitochondrial ribosomal protein subunit Rsm25	0	E	0	1	0.00023532	12	0	1
rae1	SPBC16A3.05c	RNA export factor, nucleoporin Rae1	22	E	0.00035771	5	0.00167364	19	0.0032255	10	0.00511678	6
nrm1	SPBC16A3.07c	negative regulator of MBF	6	V	0.000915345	4	0.000166234	10	3.15785e-05	8	1.08697e-05	3
SPBC16A3.08c	SPBC16A3.08c	Stm1 homolog	0	V	0.00699377	4	0	2	0	1
ufd1	SPBC16A3.09c	Cdc48-Ufd1-Npl4 complex component Ufd1	1	E			0.00030531	16	0.000113522	3	0	1
SPBC16A3.10	SPBC16A3.10	membrane bound O-acyltransferase, MBOAT	0	V			0.00169793	17	0.0034618	16	0.0049487	9
eso1	SPBC16A3.11	sister chromatid cohesion protein/DNA polymerase eta Eso1	4	E	0	1	0.000320769	16	0.000877192	16	0	1
meu7	SPBC16A3.13	alpha-amylase homolog Aah4	0	V	0	1	7.85436e-06	2	0	1
nda2	SPBC16A3.15c	tubulin alpha 1	7	E	8.57268e-05	5	0.000909753	30	0.00230751	30	0.00739228	12
SPBC16A3.16	SPBC16A3.16	mitochondrial inner membrane protein involved in cytochrome c oxidase assembly Pet191	0	V			0	2	0	1
cip1	SPBC16A3.18	RNA-binding protein Cip1	7	V	0	1	7.57056e-05	6	4.6249e-05	4
eaf7	SPBC16A3.19	histone acetyltransferase complex subunit Eaf7	0	V	0	1	0	12	0	12
SPBC16C6.05	SPBC16C6.05	mitochondrial translation initiation factor	0	V			1.1016e-06	6	0	1
vps10	SPBC16C6.06	sorting receptor for vacuolar proteins, Vps10	6	V	0.00601141	4	0.00227399	9	0.00166165	4	0	3
rpt1	SPBC16C6.07c	19S proteasome regulatory subunit Rpt1	2	E	0.00175595	5	0.000119759	32	0	7	0	3
qcr6	SPBC16C6.08c	ubiquinol-cytochrome-c reductase complex subunit 8, hinge protein	1	V			0.000598599	18	0	7	0	5
ogm4	SPBC16C6.09	protein O-mannosyltransferase Ogm4	2	E			0	2	0	2	0	2
chp2	SPBC16C6.10	chromodomain protein 2	10	V	1.01673e-06	3	1.58231e-06	5	2.85129e-06	5
rpl3201	SPBC16C6.11	60S ribosomal protein L32	0	V	0.000271298	3	6.71027e-05	139	0.000116706	51	7.7512e-08	6
sec27	SPBC16C6.13c	coatomer beta' subunit	0	E			0.00227655	35	1.31975e-05	8	6.93001e-07	7
trm11	SPBC16D10.02	tRNA	0	V			0.00105895	168	6.38891e-05	3	1.08e-06	2
pgp2	SPBC16D10.03	metallopeptidase Pgp2	0	V			0.00104923	25	0.000929724	5	0	1
dna2	SPBC16D10.04c	DNA replication endonuclease-helicase Dna2	9	E	0.00109857	5	8.00714e-05	23	0.000186781	18	0.00187579	11
mok13	SPBC16D10.05	alpha-1,3-glucan synthase Mok13	1	V			0	1	0	1
zrt1	SPBC16D10.06	ZIP zinc transporter Zrt1	2	V	0	1	0.000980434	5	0.00070506	2
sir2	SPBC16D10.07c	Sir2 family histone deacetylase Sir2	21	V	0	1	5.35263e-05	5	0	1
SPBC16D10.08c	SPBC16D10.08c	heat shock protein Hsp104	0	V			0.000174346	19	9.40258e-05	4
pcn1	SPBC16D10.09	PCNA	7	E	0.00890801	12	0.00961356	117	0.0167292	64	0.00668622	25
tad2	SPBC16D10.10	tRNA specific adenosine deaminase subunit Tad2	1	E			0.000586839	2	0	1	0	1
rps1801	SPBC16D10.11c	40S ribosomal protein S18	0	V	0.000271298	3	0.000178486	153	0.000284169	35	4.15385e-08	4
php4	SPBC16E9.01c	CCAAT-binding factor complex subunit Php4	6	V	0.000976439	2	0.000155548	7	0.00156086	3
erg6	SPBC16E9.05	sterol 24-C-methyltransferase Erg6	1	E			0.000533325	27	4.968e-05	11	0	1
pab2	SPBC16E9.12c	poly	7	V	0.000441994	3	9.45214e-05	8	0.000145441	5	0.00157453	4
zrg17	SPBC16E9.14c	cation diffusion family zinc membrane transporter Zrg17	1	V	0	1	2.20159e-05	5	0	1
rem1	SPBC16E9.17c	meiosis-specific cyclin Rem1	4	V	0	1	0.00024346	10	0.00154371	9	0	4
psd1	SPBC16E9.18	phosphatidylserine decarboxylase Psd1	1	V			1.90721e-05	6	0	5	0.00343141	3
rpn12	SPBC16G5.01	19S proteasome regulatory subunit Rpn12	7	E	0.000301846	7	0.00216503	54	0.0107798	23	0.000696229	8
SPBC16G5.02c	SPBC16G5.02c	ribokinase	0	V			0.000927955	30	0.00110891	12	0.00154622	9
mrpl23	SPBC16G5.04	mitochondrial ribosomal protein subunit L13	0	E			0.00495506	113	0.00107476	36	6.39634e-06	17
trp4	SPBC16G5.08	phosphoribosylanthranilate transferase Trp4	0	E			0.00145419	70	0.000784771	16	0	3
SPBC16G5.10	SPBC16G5.10	exosome subunit Rrp42	0	E			0	7	0	2
bag101	SPBC16G5.11c	BAG family molecular chaperone regulator Bag101	1	V	0	1	0	1	0	1
top3	SPBC16G5.12c	DNA topoisomerase III	11	E	0	2	0.0013149	36	0.000390058	15	0	3
rps3	SPBC16G5.14c	40S ribosomal protein S3	1	E	0.000221594	2	0.00652196	273	0.0082122	188	0.0180828	108
fkh2	SPBC16G5.15c	fork head transcription factor Fkh2	12	V	0.000594817	3	0.000197818	7	0.00115458	7	0.00102372	4
erg24	SPBC16G5.18	C-14 sterol reductase Erg24	2	E			1.11817e-05	12	0	5	0	2
pfk1	SPBC16H5.02	6-phosphofructokinase	2	E	0	1	0.000928195	24	0.00421989	15	0.017083	14
fub2	SPBC16H5.03c	SUMO E1-like activator enzyme Fub2	2	V			0.000342639	18	8.40284e-05	4	0	2
SPBC16H5.04	SPBC16H5.04	pho88 family protein	0	V	0	1	0.000138019	2	0	1
cyp7	SPBC16H5.05c	cyclophilin family peptidyl-prolyl cis-trans isomerase Cyp7	0	V	0	1	0	1	0	1	0	1
rip1	SPBC16H5.06	ubiquinol-cytochrome-c reductase complex subunit 5	4	V			0.00408077	73	0.00169802	22	0.000639901	7
ppa2	SPBC16H5.07c	serine/threonine protein phosphatase Ppa2	10	V	0.00108224	3	0.000742224	11	0.0013678	9
omh2	SPBC16H5.09c	alpha-1,2-mannosyltransferase Omh2	0	V			0	9	5.45346e-05	9
skb1	SPBC16H5.11c	type II protein arginine N-methyltransferase Skb1	11	V	0.0089426	8	0.00168099	20	0.00161347	10	0.0138564	3
SPBC16H5.12c	SPBC16H5.12c	conserved fungal protein	0	V	0.000221594	2	0	1	0	1
rsc9	SPBC1703.02	RSC complex subunit Rsc9	0	E	0	4	0	12	0	12	0	6
mlh1	SPBC1703.04	MutL family protein Mlh1	4	V			0.000659997	34	0.001062	12	0.000963759	6
SPBC1703.05	SPBC1703.05	protein kinase, RIO family	0	E			0.000274456	93	5.04056e-05	8	0	3
pof10	SPBC1703.06	F-box protein Pof10	4	V	0	2	0	3	0	1	0	1
SPBC1703.07	SPBC1703.07	ATP citrate synthase subunit 1	0	V	0	1	0.000232988	25	0.000428235	21	0.00113789	6
SPBC1703.08c	SPBC1703.08c	5-formyltetrahydrofolate cyclo-ligase	0	V			0.000202073	29	1.99561e-05	4	0	3
ypt1	SPBC1703.10	GTPase Ypt1	12	E	0.000774926	2	0.000168356	5	0	1
ubp9	SPBC1703.12	ubiquitin C-terminal hydrolase Ubp9	1	V	6.58695e-07	2	0.00133461	6	0.00141363	5	1.35e-05	5
SPBC1703.13c	SPBC1703.13c	mitochondrial inorganic phosphate transporter	0	V	0	1	0.000150985	15	0.000385729	4
top1	SPBC1703.14c	DNA topoisomerase I	12	V	0	2	0.00209777	41	0.00017823	10	0.000599049	3
tea4	SPBC1706.01	tip elongation aberrant protein Tea4	15	V	0.000540132	5	0.000120675	7	2.60045e-05	5	1.8e-07	3
chs2	SPBC1709.01	chitin synthase homolog Chs2	6	V	0.00347403	9	0.000666221	4	0.000665424	2
vrs1	SPBC1709.02c	cytoplasmic valine-tRNA ligase Vrs1/Vas1	2	E			0.00151048	57	7.21283e-06	3	0	1
sks2	SPBC1709.05	heat shock protein, ribosome associated molecular chaperone Sks2	3	V	0.00021448	2	0.000524272	17	0.000167032	2	0	1
erg27	SPBC1709.07	3-keto sterol reductase	1	E			0.000690175	15	1.89166e-06	8	0.00170424	3
cft1	SPBC1709.08	cleavage factor one Cft1	2	E	0	2	6.06625e-05	15	0.000169389	13	0	6
rrf1	SPBC1709.09	mitochondrial translation termination factor Rrf1	0	V			0	2	0	1
atx1	SPBC1709.10c	copper chaperone Atx1	3	V	0	1	5.22532e-05	7	8.48056e-07	2	0	1
png2	SPBC1709.11c	ING family homolog Png2	1	V	0	1	0.00158086	27	1.65877e-05	19	0.00387022	10
rid1	SPBC1709.12	GTPase binding protein Rid1	1	V			1.15234e-06	4	2.90618e-07	4	0	1
SPBC1709.14	SPBC1709.14	peptide N-glycanase	0	V	0	1	0	2	0	1	0	1
cft2	SPBC1709.15c	cleavage factor two Cft2/polyadenylation factor CPSF-73	1	E	0	2	6.06625e-05	15	0.000169389	13	0	6
SPBC1709.16c	SPBC1709.16c	aromatic ring-opening dioxygenase	0	V			1.6474e-06	2	0	1
SPBC1709.17	SPBC1709.17	folylpolyglutamate synthase	0	E			8.55972e-06	6	5.63644e-06	3	0	1
tif452	SPBC1709.18	translation initiation factor eIF4E 4F complex subunit	1	V			0	35	0	35	1.7887e-06	31
SPBC1709.19c	SPBC1709.19c	NifU-like protein	0	V			0.000438978	20	0	3	0	1
SPBC1711.04	SPBC1711.04	methylenetetrahydrofolate reductase	0	V			2.94583e-05	22	0.000190534	12	0.000255438	7
SPBC1711.05	SPBC1711.05	nucleocytoplasmic transport chaperone Srp40	0	V	0	1	0.00106055	90	0.00113033	7
rpl401	SPBC1711.06	60S ribosomal protein L2	0	V	0.000271298	3	0.000227067	148	0.00028661	66	6.67443e-05	16
SPBC1711.07	SPBC1711.07	WD repeat protein Rrb1	0	E			0.000695012	206	0.00134212	34	0	2
SPBC1711.08	SPBC1711.08	chaperone activator Aha1	0	V			0.000140926	14	0	2	0	2
npl4	SPBC1711.10c	Cdc48-Npl4-Ufd1 complex component Npl4	0	E			0.000234373	12	0.000136954	3	0	1
his2	SPBC1711.13	histidinol dehydrogenase His2	4	V			0.00271714	82	0.00409734	24	0.000844392	6
SPBC1711.16	SPBC1711.16	WD repeat protein	0	E			0.00205524	204	0.000487802	25	0	1
pop1	SPBC1718.01	cullin 1 adaptor protein Pop1	9	V	0.00167384	9	3.46335e-05	9	2.93267e-05	8	0.000234646	3
hop1	SPBC1718.02	linear element associated protein Hop1	10	V	0	1	5.27456e-05	8	6.50374e-06	2	0	1
ker1	SPBC1718.03	DNA-directed RNA polymerase I complex subunit Ker1	1	V	0	1	0	5	0	3	0	2
SPBC1718.04	SPBC1718.04	glycerol-3-phosphate O-acyltransferase	0	E			8.47754e-05	8	0.000589519	8	5.40001e-07	2
trs31	SPBC1718.05	TRAPP complex subunit Trs31	0	E			0	4	0	3
msp1	SPBC1718.06	mitochondrial dynamin family GTPase Msp1	8	V	0	1	0.000248748	7	0	1
zfs1	SPBC1718.07c	CCCH tandem zinc finger protein, human Tristetraprolin homolog Zfs1, involved in mRNA catabolism	8	V	0.002822	17	0.00309692	38	0.00311364	17	0	1
esf1	SPBC1734.01c	pre-rRNA processing protein Esf1	0	E			0.00046095	101	1.93774e-06	8
cdc27	SPBC1734.02c	DNA polymerase delta subunit Cdc27	30	E	0.0033291	6	0.000539759	24	0.00136355	24	0.000178776	7
SPBC1734.03	SPBC1734.03	dihydropteroatesynthase/2-amino-4-hydroxy-6-hydroxymethyldihydropteridinediphosphokinase/dihydroneopterin aldolase	0	E			0.00106917	49	0.000193435	5	1.62e-06	3
anp1	SPBC1734.04	mannosyltransferase complex subunit, Anp family	2	V	0	1	0.000196912	6	0	2	0	1
rhp18	SPBC1734.06	Rad18 homolog Rhp18	5	V	0	1	0.00208435	27	0.000922593	14
hse1	SPBC1734.08	STAM like protein Hse1	0	V			8.26559e-05	7	0	1	0	1
mas5	SPBC1734.11	DNAJ domain protein Mas5	1	V	0	1	0.000218996	16	0.000291676	4
alg12	SPBC1734.12c	alpha-1,6-mannosyltransferase for the addition of the mannose to dolichol-linked Man7GlcNAc2, Alg12	1	V			3.84026e-05	4	0	1	0	1
atp3	SPBC1734.13	F1-ATPase gamma subunit	0	V			0.00195841	83	0.000426788	17	0.00341186	8
suc1	SPBC1734.14c	cyclin-dependent protein kinase regulatory subunit Suc1	107	E	0.00363368	6	0.00159764	29	0.00094829	7	0	1
rsc4	SPBC1734.15	RSC complex subunit Rsc4	1	V	0	4	0	12	0	12	0	6
pst3	SPBC1734.16c	SIN3 family co-repressor Pst3	0	E			1.4645e-05	19	1.65877e-05	19
SPBC1773.02c	SPBC1773.02c	thioredoxin peroxidase	0	V			0.000110428	18	0	1
SPBC1773.03c	SPBC1773.03c	aminotransferase class-III, unknown specificty	0	V			8.64987e-06	6	0	2
SPBC1773.04	SPBC1773.04	mythylglyoxyl reductase	0	V	0	1	0	1	0	1
tms1	SPBC1773.05c	hexitol dehydrogenase	6	V			0.00011274	9	0	2	0	2
sbp1	SPBC1773.07c	Ran GTPase binding protein Sbp1	3	E	0	1	0.000236175	19	0.000211321	5	0.000316076	2
nrs1	SPBC1773.10c	cytoplasmic asparagine-tRNA ligase Nrs1	0	E	9.59957e-05	3	0.00135613	80	0.000536784	8	0	2
SPBC1773.13	SPBC1773.13	aromatic aminotransferase	0	V			1.64854e-05	10	0.000546651	10	0.00080743	2
arg7	SPBC1773.14	argininosuccinate lyase	1	V			0.000186586	36	0.000994267	25	0.00296577	7
zuo1	SPBC1778.01c	zuotin	3	V			0.00150198	75	4.48563e-06	3
rap1	SPBC1778.02	telomere binding protein Rap1	21	V	0.00324276	4	0.000301782	7	0.000589179	6	0	2
spo6	SPBC1778.04	Spo4-Spo6 kinase complex regulatory subunit Spo6	6	V	0	1	1.51564e-05	7	0	1	0	1
fim1	SPBC1778.06c	fimbrin	3	V	0.000870675	3	0.0014924	28	0.000289979	11	0.000861862	5
arc3	SPBC1778.08c	ARP2/3 actin-organizing complex subunit Arc21	2	E	0.00115371	4	0.00104378	20	0.0026771	12	0	6
ppk21	SPBC1778.10c	serine/threonine protein kinase Ppk21	0	V			0	1	0	1	0	1
tim50	SPBC17A3.01c	TIM23 translocase complex subunit Tim50	0	E	0	1	0.000496105	10	0.0053467	5	0	2
rar1	SPBC17A3.04c	cytoplasmic methionine-tRNA ligase Mrs1	11	E	0	1	0.00314704	183	0.00459302	21	0.00170856	3
SPBC17A3.06	SPBC17A3.06	phosphoprotein phosphatase	0	V			8.21082e-06	89	0	3
pgr1	SPBC17A3.07	mitochondrial glutathione reductase Pgr1	3	E			0.00114267	33	0.000525403	10	0.00680833	4
SPBC17A3.08	SPBC17A3.08	TatD homolog	0	V			0.00036367	47	0.000495767	5
aim22	SPBC17A3.09c	lipoate-protein ligase A	0	V			9.15175e-05	18	1.78593e-05	9	0.00170856	3
dph2	SPBC17D1.02	diphthamide biosynthesis protein	0	V			8.97339e-07	10	0	2
SPBC17D1.03c	SPBC17D1.03c	exosome subunit Rrp43	0	E			1.4297e-05	14	2.58955e-05	9	0	8
acr1	SPBC17D1.04	upstream activation factor complex subunit Acr1	2	E			0	3	0	3
nep1	SPBC17D11.01	NEDD8 protease Nep1	1	V	0.000599298	4	0.000101789	10	0.000347948	10	0	2
tif32	SPBC17D11.05	translation initiation factor eIF3a	0	E	0.00223791	6	0.00203162	129	0.000129861	41	9.86281e-05	31
spp2	SPBC17D11.06	DNA primase large subunit Spp2	2	E	2.32894e-05	2	0.000675945	47	0.00105147	39	0.000244484	26
rpn2	SPBC17D11.07c	19S proteasome regulatory subunit Rpn2	0	E	1.10693e-05	5	0.000322487	38	0.000264836	15	1.46798e-05	5
nak1	SPBC17F3.02	PAK-related kinase Nak1	8	E	0.000620231	5	0.000182643	3	5.05994e-05	3
SPBC17G9.02c	SPBC17G9.02c	RNA polymerase II accessory factor, Cdc73 family	0	V			0.00146587	36	0	3
krs1	SPBC17G9.03c	cytoplasmic lysine-tRNA ligase Krs1	0	E			0.000777518	82	7.13466e-05	4
nup85	SPBC17G9.04c	nucleoporin Nup85	3	E	0	2	0	33	0	33	0.00442427	10
rct1	SPBC17G9.05	RRM-containing cyclophilin regulating transcription Rct1	1	V			2.28548e-06	2	0	1
SPBC17G9.06c	SPBC17G9.06c	siderophore-iron biosynthesis protein	0	V			0	1	0	1	0	1
rps2402	SPBC17G9.07	40S ribosomal protein S24	0	V	0.000221594	2	0.000102533	131	1.14504e-05	15	0	2
tif213	SPBC17G9.09	translation initiation factor eIF2 gamma subunit	0	V	0	1	0.00321008	187	0.00452471	54	0.00190294	39
rpl1102	SPBC17G9.10	60S ribosomal protein L11	0	V	0.000539732	4	0.000628783	181	0.00133934	86	0.000280298	35
pyr1	SPBC17G9.11c	pyruvate carboxylase Pyr1	0	E			0.0013688	67	0.00243742	31	0.00329911	10
eno101	SPBC1815.01	enolase	0	V	0.00105113	5	0.000836326	37	0.000614092	12	0.000948266	8
mot1	SPBC1826.01c	TATA-binding protein associated factor Mot1	0	E			0.00122799	32	1.60746e-05	6	0	2
cnp3	SPBC1861.01c	CENP-C	2	V	0.000637143	3	2.54911e-05	47	6.39987e-05	47	0	3
abp2	SPBC1861.02	ARS binding protein Abp2	1	V	0	1	8.71877e-06	2	0	1
SPBC1861.07	SPBC1861.07	elongin C	0	V			0.000612943	19	9.81373e-05	3
lea1	SPBC1861.08c	U2 snRNP-associated protein Lea1	0	E	6.48969e-06	6	0.000426381	24	0	1	0	1
SPBC18A7.01	SPBC18A7.01	X-Pro dipeptidase	0	V			2.17448e-05	20	0	1
SPBC18E5.02c	SPBC18E5.02c	serine palmitoyltransferase complex subunit	0	E			0.000414878	14	0	6
sim4	SPBC18E5.03c	kinetochore protein, CENP-K ortholog, Sim4	5	E	0.00118525	14	0.000190018	30	2.70294e-05	27	0.00183769	12
rpl1001	SPBC18E5.04	60S ribosomal protein L10	2	V	0.000221594	2	4.65982e-05	106	5.08785e-06	11	0	1
rps21	SPBC18E5.06	40S ribosomal protein S21	2	E	0.000394434	2	0.000256796	177	0.00063859	112	0.000480587	55
SPBC18E5.10	SPBC18E5.10	iron sulfur cluster assembly protein	0	V			0.000424565	39	0.000253294	7	1.62e-06	2
mas2	SPBC18E5.12c	mitochondrial processing peptidase	0	E			7.14648e-06	5	0	1
SPBC18E5.13	SPBC18E5.13	mitochondrial translation initiation factor	0	V			4.38697e-05	7	0	1
lcf1	SPBC18H10.02	long-chain-fatty-acid-CoA ligase Lcf1	2	V	0	1	5.4201e-05	5	0.00070506	2
tif35	SPBC18H10.03	translation initiation factor eIF3g	1	E	4.28152e-07	3	0.00098661	141	0.000164786	41	0.000107334	34
sce3	SPBC18H10.04c	translation initiation factor	2	V	0	1	0.000230563	37	0.0014458	37
swd2	SPBC18H10.06c	Set1C complex subunit Swd2.1	0	V	0	9	0.000224993	10	0.000281315	8	0	7
ubp4	SPBC18H10.08c	ubiquitin C-terminal hydrolase Ubp4	1	V	0.00108224	2	0.000586839	3	0	1	0	1
rpl701	SPBC18H10.12c	60S ribosomal protein L7	0	E	0.000479309	3	0.000293613	159	0.000200565	73	7.86315e-07	42
rps1402	SPBC18H10.13	40S ribosomal protein S14	0	V	0	1	0.00062709	176	0.00168345	66	0.000100199	13
rps1601	SPBC18H10.14	40S ribosomal protein S16	0	E	0.000221594	2	0.00032522	155	0.000301105	36	0	2
rpl35b	SPBC1921.01c	60S ribosomal protein L35a	0	V			8.50736e-05	154	2.04941e-06	49	9.75225e-06	43
rad60	SPBC1921.02	DNA repair protein Rad60	15	E	0.00068065	5	0.000112318	15	0.00125676	15	0.00287591	3
mex67	SPBC1921.03c	mRNA export receptor, Tap, nucleoporin Mex67	9	V	0	2	0.000926891	19	0.0016718	8	0.000855091	4
ape2	SPBC1921.05	aminopeptidase Ape2	0	V	0	3	4.8905e-05	4	0	3
sgf29	SPBC1921.07c	SAGA complex subunit Sgf29	0	V	0	3	0	8	0	1	0	1
cdc28	SPBC19C2.01	ATP-dependent RNA helicase Cdc28	86	E	0	3	5.04634e-05	6	0.000173404	5
pmt1	SPBC19C2.02	DNA methyltransferase homolog	9	V			4.71327e-07	3	7.56874e-06	3
rpc10	SPBC19C2.03	DNA-directed RNA polymerase I, II and III subunit Rpc10	12	E	0.000715289	9	0.00295138	155	0.0031104	99	0.00439331	45
ubp11	SPBC19C2.04c	ubiquitin C-terminal hydrolase Ubp11	0	V	0	1	0	1	0	1	0	1
ran1	SPBC19C2.05	serine/threonine protein kinase Ran1	71	E	0.00188285	6	0.00229744	28	0.0066815	27	0.00637463	8
fba1	SPBC19C2.07	fructose-bisphosphate aldolase Fba1	0	E	0.00348823	7	0.00470496	75	0.0051182	27	0.00107151	13
sre1	SPBC19C2.09	sterol regulatory element binding protein, transcription factor Sre1	20	V	0	1	0.00177532	6	0.0014096	3	0	2
SPBC19C2.10	SPBC19C2.10	BAR adaptor protein	0	V			0	8	0	8
mrpl51	SPBC19C2.12	mitochondrial ribosomal protein subunit L51	0	E	0	1	0.000528379	17	2.88125e-05	2
ctu2	SPBC19C2.13c	cytosolic thiouridylase subunit Ctu2	1	V	0	1	0	1	0	1	0	1
smd3	SPBC19C2.14	Sm snRNP core protein Smd3	0	V	0.00442269	9	0.00195145	64	0.0054434	45	0.00255212	34
cyr1	SPBC19C7.03	adenylate cyclase	23	V	0.0023366	3	0.00338326	52	0.00807286	47	0.00661309	5
SPBC19C7.04c	SPBC19C7.04c	conserved fungal protein	0	V	0	1	8.61402e-05	3	0	1
prs1	SPBC19C7.06	cytoplasmic proline-tRNA ligase Prs1	0	E			0.00346502	147	0.000725234	10
sen34	SPBC19C7.07c	tRNA-splicing endonuclease catalytic subunit Sen34	0	E			0	1	0	1
uve1	SPBC19C7.09c	endonuclease Uve1	26	V			8.3271e-05	15	0.000357452	14	0.000807106	3
puc1	SPBC19F5.01c	cyclin Puc1	10	V			0.000321274	9	2.04403e-05	6	0	1
utp4	SPBC19F5.02c	U3 snoRNP protein Utp4	0	E			0.000101527	150	2.2029e-05	38	6.91756e-05	13
SPBC19F5.03	SPBC19F5.03	inositol polyphosphate phosphatase	0	E			0.000218813	8	0	1
SPBC19F5.04	SPBC19F5.04	aspartate kinase	0	E			0.00183316	57	0.000140684	15	0.0012345	5
ppp1	SPBC19F5.05c	pescadillo-family BRCT domain protein	0	E	0	1	0.00281807	235	0.000702449	58	0.00703325	13
spn7	SPBC19F8.01c	septin Spn7	1	V	0	4	0	3	0	3
SPBC19F8.02	SPBC19F8.02	nuclear distribution protein NUDC homolog	0	V			0	1	0	1
SPBC19F8.05	SPBC19F8.05	sequence orphan	0	E	0	1	0	1	0	1
mcs6	SPBC19F8.07	cyclin-dependent protein kinase/CDK-activating kinase Mcs6	21	E	0.00177155	4	0.000943983	72	0.00349077	70	0.00870259	21
rps401	SPBC19F8.08	40S ribosomal protein S4	0	V	0	1	9.70753e-05	127	0.000104651	40	0	2
msh2	SPBC19G7.01c	MutS protein homolog 2	19	V			0.00130177	42	0.000904089	22	0.00161579	9
SPBC19G7.02	SPBC19G7.02	4-amino-4-deoxychorismate lyase	0	V			1.93184e-06	2	0	1	0	1
rps3002	SPBC19G7.03c	40S ribosomal protein S30	1	V	0	1	5.57134e-05	103	0	2
bgs1	SPBC19G7.05c	1,3-beta-glucan synthase catalytic subunit Bgs1	20	E	0.0269879	8	0.00515658	34	0.0182137	33	0.00257786	5
mbx1	SPBC19G7.06	MADS-box transcription factor Mbx1	2	V	0.000756723	3	0.000118638	7	3.37559e-05	5	0.00012879	4
ulp1	SPBC19G7.09	SUMO deconjugating enzyme Ulp1	1	V			0	1	0	1
nup44	SPBC19G7.15	nucleoporin Nup44	0	E			8.00845e-06	34	0	33	0.000125781	11
iws1	SPBC19G7.16	transcription elongation factor complex subunit Iws1	1	V			3.62037e-05	10	0	3
SPBC19G7.17	SPBC19G7.17	translocon subunit Sec61 homolog	0	V	0	1	3.4449e-05	16	0	1
apc10	SPBC1A4.01	anaphase-promoting complex subunit Apc10	6	E	0	4	0.000734334	28	0.000471628	25	0.000982933	11
leu1	SPBC1A4.02c	3-isopropylmalate dehydrogenase Leu1	13	V	0	1	0.000681489	27	0.00210086	13	0.00163535	7
top2	SPBC1A4.03c	DNA topoisomerase II	21	E			0.00350273	56	0.00131316	14	0.000121566	3
blt1	SPBC1A4.05	Blt1	0	V	0	1	0	5	0	5
SPBC1A4.07c	SPBC1A4.07c	U3 snoRNP-associated protein Sof1	0	E			0.000784269	173	0.000494107	57	0.00098198	20
cct3	SPBC1A4.08c	chaperonin-containing T-complex gamma subunit Cct3	0	E	0	1	0.000421512	26	0.00138368	18	5.70641e-05	14
SPBC1A4.09	SPBC1A4.09	pseudouridine synthase	0	V			0.000535991	169	6.19979e-06	6
pmc1	SPBC1A4.10c	mediator complex subunit Pmc1	2	E	0	1	2.36992e-05	20	0	19	1.08e-07	2
SPBC1D7.01	SPBC1D7.01	prefoldin subunit 1	0	V			1.03853e-05	17	0	16	2.22e-07	12
mlo3	SPBC1D7.04	RNA binding protein Mlo3	5	V	0.0327639	44	0.00403358	36	0.00773154	11	5.40001e-07	3
byr2	SPBC1D7.05	MAP kinase kinase kinase Byr2	44	V	0.00449278	8	0.00127678	20	0.00132197	14	0.00388847	3
gar1	SPBC20F10.01	snoRNP pseudouridylase box H/ACA snoRNP complex protein Gar1	6	E	0.00935667	7	0.00254501	209	0.00430881	53	1.38065e-05	4
nse4	SPBC20F10.04c	Smc5-6 complex non-SMC subunit Nse4	8	E	2.04069e-05	7	0.000180894	11	1.04376e-07	7	8.64001e-07	7
mad2	SPBC20F10.06	spindle checkpoint protein Mad2	60	V	0.00770755	12	0.0171759	135	0.0115845	86	0.0383429	37
lsm5	SPBC20F10.09	U6 snRNP-associated protein Lsm5	0	E			0.000491619	46	4.16681e-06	15	1.34758e-05	11
psl1	SPBC20F10.10	cyclin pho85 family	0	V			0	1	0	1
mis17	SPBC21.01	kinetochore protein Mis17	2	E	0.00683841	16	0.000191012	61	0.000332763	61	2.55692e-05	9
med8	SPBC21.04	mediator complex subunit Med8	9	E	0.0013234	9	0.000783771	25	0.00348087	23	0.000921129	13
ral2	SPBC21.05c	Ras1-Scd pathway protein Ral2	3	V	0	1	0.000222361	6	0	2	0	1
cdc7	SPBC21.06c	serine/threonine protein kinase Cdc7	88	E	0.000802257	8	0.000491564	21	0.00256061	21	5.0397e-05	4
rsm10	SPBC211.01	mitochondrial ribosomal protein subunit S10	0	E			0.000136715	44	8.52441e-08	14	0	1
cwf3	SPBC211.02c	complexed with Cdc5 protein Cwf3	0	E	0.000503822	9	0.00115474	41	0.00258746	33	0.005793	17
SPBC211.03c	SPBC211.03c	guanyl-nucleotide exchange factor	0	E			1.75905e-05	4	0	1	0	1
mcm6	SPBC211.04c	MCM complex subunit Mcm6	32	E	0.00485252	9	0.000923064	52	0.00105191	40	0.000974745	31
sab10	SPBC211.05	splicing factor 3B	0	V	0	2	0.000477585	61	8.84783e-05	38	0.000684914	26
gfh1	SPBC211.06	gamma tubulin complex subunit Gfh1	2	V	0.000279154	6	2.2122e-06	7	0	6	0	5
SPBC211.08c	SPBC211.08c	exosomal 3'-5' exoribonuclease, PH-like	0	E			3.9109e-06	10	0	8	0	8
bob1	SPBC215.02	prefoldin subunit 5	5	V	0	1	0.00263858	65	0.000192899	17	0.00044929	16
csn1	SPBC215.03c	COP9/signalosome complex subunit Csn1	5	V	0.000415777	5	5.3894e-05	12	0.000105248	10	0.000553008	6
git11	SPBC215.04	heterotrimeric G protein gamma subunit Git11	5	V	0.00108224	3	9.08956e-06	6	0	3	0	2
gpd1	SPBC215.05	glycerol-3-phosphate dehydrogenase Gpd1	12	V	0.000133844	2	0.00200405	26	0.000223654	6	0	2
SPBC215.06c	SPBC215.06c	human LYHRT homolog	0	V	0	1	8.48912e-05	35	0	1
arg4	SPBC215.08c	arginine specific carbamoyl-phosphate synthase Arg4	0	V			0.00158111	73	8.174e-05	12	0.00118064	9
erg10	SPBC215.09c	acetyl-CoA C-acetyltransferase Erg10	0	E			0.000636563	36	0.000222065	14	0.00579459	5
cwf10	SPBC215.12	GTPase Cwf10	0	E	4.19414e-05	9	0.000213491	47	0.00032093	38	0.00033468	20
vps20	SPBC215.14c	ESCRT III complex subunit Vps20	0	V			0.00145774	11	1.52215e-07	3	0	1
sec13	SPBC215.15	COPII-coated vesicle component Sec13	2	V			0.00300245	24	0.0014096	6	1.35e-07	5
mcp5	SPBC216.02	cortical anchoring factor for dynein Mcp5/Num1	3	V	0.000674516	2	1.00036e-06	5	0	1	0	1
SPBC216.04c	SPBC216.04c	methionine sulfoxide	0	V			0.00147425	39	0.00070506	2	0	1
rad3	SPBC216.05	ATR checkpoint kinase Rad3	147	V	0.00526201	10	0.00190615	52	0.00363443	48	0.022978	14
swi1	SPBC216.06c	replication fork protection complex subunit Swi1	32	V	0.000376776	5	7.25216e-05	20	8.1816e-05	15	0.000181833	4
tor2	SPBC216.07c	phosphatidylinositol kinase Tor2	25	E	0.00406364	10	0.00111169	26	0.000965321	16	0.00187147	9
SPBC21B10.03c	SPBC21B10.03c	ataxin-2 homolog	0	V	0	1	3.49247e-05	3	0	1
nrf1	SPBC21B10.04c	GTPase regulator Nrf1	1	V			0.000720129	5	0.00140986	4
pop3	SPBC21B10.05c	WD repeat protein Pop3	8	V	0.00260272	5	0.00148443	24	0.00103979	13	0.000622362	10
rps402	SPBC21B10.10	40S ribosomal protein S4	0	V	0	1	9.70753e-05	127	0.000104651	40	0	2
dpm2	SPBC21B10.11	dolichol-phosphate mannosyltransferase subunit 2	1	E			0.000692579	24	0.00501522	24	0.0034137	6
rec6	SPBC21B10.12	meiotic recombination protein Rec6	3	V			0.000144378	10	0	2
yox1	SPBC21B10.13c	MBF complex negative regulatory component Yox1	5	V	0	3	3.48774e-05	8	6.95855e-05	8	0	2
dep1	SPBC21C3.02c	Sds3-like family protein Dep1	0	V			1.4645e-05	19	1.65877e-05	19
SPBC21C3.04c	SPBC21C3.04c	mitochondrial ribosomal protein subunit L34	0	E			0.000105179	18	2.01332e-05	2
sap62	SPBC21C3.05	zinc finger protein Sap62	0	E	3.74923e-05	8	0.000253867	29	7.84388e-07	7	0	4
car2	SPBC21C3.08c	ornithine transaminase Car2	0	V			3.97954e-05	21	0.000689853	12	0.000199876	7
SPBC21C3.09c	SPBC21C3.09c	fumarylacetoacetate hydrolase family protein	0	V			0.00300511	42	0	1
rps1901	SPBC21C3.13	40S ribosomal protein S19	0	V	0	1	0.000136191	144	0.000123419	20
spt4	SPBC21C3.16c	transcription elongation factor complex subunit Spt4	5	V	0	1	0.000522868	37	0.000370507	22	0.00115759	15
SPBC21C3.17c	SPBC21C3.17c	conserved fungal protein	0	V	0	1	0	1	0	1
spo4	SPBC21C3.18	serine/threonine protein kinase Spo4	5	V	0	1	0.00109955	31	0.000720542	26	0.000854821	11
git1	SPBC21C3.20c	C2 domain protein Git1	5	V	0	1	0	1	0	1
bdc1	SPBC21D10.10	bromodomain containing protein 1, Bdc1	0	V	0	1	0	12	0	12	0	1
nfs1	SPBC21D10.11c	mitochondrial cysteine desulfurase Nfs1	1	V			0.00146215	50	0.00282193	11	2.16e-06	3
hob1	SPBC21D10.12	BAR adaptor protein Hob1	4	V	0	2	0.00780825	57	0.00205922	9	0	1
taf10	SPBC21H7.02	SAGA complex/transcription factor TFIID complex subunit Taf10	0	E	0	2	0.000470706	54	0.000527373	42	0.000215998	19
SPBC21H7.03c	SPBC21H7.03c	acid phosphatase	0	V			8.93981e-06	2	1.1882e-05	2
sfc6	SPBC21H7.05	transcription factor TFIIIC complex subunit Sfc6	0	E	3.29348e-07	3	0	3	0	3	0.00042714	3
his5	SPBC21H7.07c	imidazoleglycerol-phosphate dehydratase His5	10	V			0.00210418	79	0.00172522	16	0.00042687	5
SPBC23E6.01c	SPBC23E6.01c	mRNA processing factor	0	V	0.000335247	3	7.20426e-05	3	0.000174691	3
SPBC23E6.06c	SPBC23E6.06c	3,4-dihydroxy-2-butanone 4-phosphate synthase	0	E			0.000513389	40	8.73715e-06	4	0	3
rfc1	SPBC23E6.07c	DNA replication factor C complex subunit Rfc1	7	E	0	1	0.000267748	34	0.000154526	24	0.000884829	19
sat1	SPBC23E6.08	Golgi membrane exchange factor subunit Sat1	0	V	0	1	0	2	0	2
ssn6	SPBC23E6.09	transcriptional corepressor Ssn6	7	V	0	2	0.000965804	12	0	2	0	2
SPBC23E6.10c	SPBC23E6.10c	methylthioribose-1-phosphate isomerase	0	V			0.00334615	86	0.00431517	13	0	1
nif1	SPBC23G7.04c	SEL1 repeat protein Nif1	3	V	0	1	0	1	0	1
sui1	SPBC23G7.05	translation initiation factor eIF1	4	E			0.00182408	35	0.00138442	12
rga7	SPBC23G7.08c	Rho-type GTPase activating protein Rga7	1	V			1.19884e-05	6	2.41061e-05	4	0	1
mag2	SPBC23G7.11	DNA-3-methyladenine glycosidase Mag2	1	V			7.49389e-07	3	0	2
rpt6	SPBC23G7.12c	19S proteasome regulatory subunit Rpt6	5	V	0.00092369	4	0.00038414	37	0	12	0	3
rpp202	SPBC23G7.15c	60S acidic ribosomal protein P2B subunit	0	V	0.00070802	3	0.000172639	126	0.000158809	52	1.55437e-05	43
ctr6	SPBC23G7.16	vacuolar copper transporter Ctr6	1	V			1.80512e-05	5	0	1
mat3-m	SPBC23G7.17c	mating-type M-specific polypeptide Mi 2	95	V	0	1	4.5761e-05	5	0	1
sid4	SPBC244.01c	SIN component scaffold protein Sid4	18	E	0.00242867	10	0.000143573	14	0.000150775	12	0.000728365	8
SPBC244.02c	SPBC244.02c	U3 snoRNP-associated protein Utp6	0	E			0	36	0	3
SPBC24C6.03	SPBC24C6.03	mitochondrial proline-tRNA ligase	0	E			0.000325477	31	8.01325e-05	3
SPBC24C6.04	SPBC24C6.04	delta-1-pyrroline-5-carboxylate dehydrogenase	0	V			0.00017988	30	0.000916466	28	0.0022161	6
sec28	SPBC24C6.05	coatomer epsilon subunit	0	V			0	7	0	7	0	4
gpa1	SPBC24C6.06	G-protein alpha subunit	11	V	0	1	0.00172355	15	0.00181991	11	0.00381895	4
cdc14	SPBC24C6.07	SIN component Cdc14	48	E	1.16503e-05	2	0.000857615	19	0.00288028	19	0.000120249	3
cwf14	SPBC24C6.11	G10 protein	0	V	0	4	0.000486063	19	1.56003e-06	3	0	1
SPBC25B2.01	SPBC25B2.01	elongation factor 1 alpha related protein	0	V	0	1	1.91993e-06	3	7.13446e-05	3	0	1
mis3	SPBC25B2.05	rRNA processing protein Mis3	0	E			0.0043138	216	0.015178	78	0.000725025	20
btb2	SPBC25B2.06c	BTB/POZ domain protein Btb2	0	V	0	2	2.25424e-07	5	0	2	0	1
mug164	SPBC25B2.07c	microtubule-associated protein Mug164	0	V	0	1	0	1	0	1
mrs1	SPBC25B2.09c	mitochondrial and cytoplasmic arginine-tRNA ligase Rrs1/Mrs1	0	E			0.000765326	35	0	1
dnt1	SPBC25D12.02c	nucleolar protein Dnt1	1	V	0	1	1.8749e-05	5	0.000212366	5
mcm7	SPBC25D12.03c	MCM complex subunit Mcm7	14	E	3.21877e-05	9	0.00048728	55	0.000435004	41	0.000974745	31
suc22	SPBC25D12.04	ribonucleotide reductase small subunit Suc22	11	E	0.00108224	2	0.00203438	55	0.00120241	14	0.001161	5
trm1	SPBC25D12.05	N2,N2-dimethylguanosine tRNA methyltransferase	1	V			0.00152745	185	0.00083272	15	0	1
trs1	SPBC25H2.02	cytoplasmic threonine-tRNA ligase Trs1	1	E	0.000466889	2	0.00165777	86	0.0029655	9
SPBC25H2.03	SPBC25H2.03	vacuolar protein involved in phosphoinositide metabolism	0	V			0.00118448	10	0.00070506	2	0	1
tim22	SPBC25H2.04c	TIM22 inner membrane protein import complex subunit Tim22	0	E			2.56103e-05	13	0	5	0	3
egd2	SPBC25H2.05	nascent polypeptide-associated complex alpha subunit Egd2	0	V	0	1	0.000969733	80	0.000115989	4	0	1
hrf1	SPBC25H2.06c	COPII-coated vesicle component Hrf1	0	E			0.000116556	6	0	1
tif11	SPBC25H2.07	translation initiation factor eIF1A	0	E			0.000607693	114	0.00121429	43	3.03058e-05	30
spt7	SPBC25H2.11c	SAGA complex bromodomain subunit Spt7	0	V	0.00853864	3	0	1	0	1
cct7	SPBC25H2.12c	chaperonin-containing T-complex eta subunit Cct7	1	E	0	1	0.00017995	24	4.63107e-05	17	5.68421e-05	13
cdc20	SPBC25H2.13c	DNA polymerase epsilon catalytic subunit Pol2	33	E	0.001937	4	0.00176717	58	0.00285879	42	0.00070779	20
mug16	SPBC25H2.14	UNC-50 family protein	0	V	0	1	0.000108956	3	0	1
thi2	SPBC26H8.01	thiazole biosynthetic enzyme	8	V			0.00212741	20	0	1	0	1
sec9	SPBC26H8.02c	SNAP-25 homologue, t-SNARE component Sec9	3	E			0	3	0	2	0	2
cho2	SPBC26H8.03	phosphatidylethanolamine N-methyltransferase Cho2	4	V			0.0010093	15	1.56564e-07	7	3.96e-06	2
grx4	SPBC26H8.06	glutaredoxin Grx4	6	E	7.50101e-05	2	3.63606e-05	9	0.000562173	3	0	1
nda3	SPBC26H8.07c	tubulin beta Nda3	20	E	0.000424575	2	0.0016027	23	0.00507055	23	0.00127568	3
grn1	SPBC26H8.08c	GTPase Grn1	1	V	0.00114213	3	0.00131374	187	0.000885163	28
snf59	SPBC26H8.09c	SWI/SNF complex subunit Snf59	0	V	0.000930575	13	0	11	0	11	0.00042377	11
dis3	SPBC26H8.10	3'-5' exoribonuclease subunit Dis3	19	E	0.00126481	4	0.00299731	86	0.0047838	22	0.0163208	14
SPBC26H8.12	SPBC26H8.12	cytochrome c heme lyase	0	V			0	2	0	2
cox17	SPBC26H8.14c	cytochrome C oxidase copper chaperone Cox17	2	V			0.00207427	47	0.00139749	16	0.00042282	2
ask1	SPBC27.02c	DASH complex subunit Ask1	2	V	0.00108355	7	0	45	0	45	0.00230135	12
sua1	SPBC27.08c	sulfate adenylyltransferase	1	V			0.000102353	16	6.54218e-05	7	0	3
tom40	SPBC27B12.13	mitochondrial TOM complex subunit Tom40	0	E			0.000679252	21	0.00410413	7	2.43e-05	3
apc13	SPBC28E12.01c	anaphase-promoting complex subunit Apc13	1	E	0.000567077	13	0	12	0	12	0.000277238	12
rga4	SPBC28E12.03	Rho-type GTPase activating protein Rga4	6	V	0.000143941	3	0.000145885	9	7.8277e-05	7	0.00196586	5
esf2	SPBC28E12.05	U3 snoRNP-associated protein Esf2	0	E			0.00015017	149	9.79948e-07	14
cwf7	SPBC28F2.04c	splicing factor Cwf7	0	E	9.85547e-06	8	0	4	0	2	0	2
mdm12	SPBC28F2.06c	Mdm10/Mdm12/Mmm1 complex subunit Mdm12	1	E			0.000180518	7	0	1
sfr1	SPBC28F2.07	Swi five-dependent recombination repair protein Sfr1	17	V	0.000308777	5	0.00817224	81	0.000120789	12	0.000146645	4
SPBC28F2.08c	SPBC28F2.08c	HRD ubiquitin ligase complex subunit	0	V			0	3	0	3
toa1	SPBC28F2.09	transcription factor TFIIA complex large subunit Toa1	0	E			0	35	0	35	1.0702e-06	6
ngg1	SPBC28F2.10c	SAGA complex subunit Ngg1	0	V	0.00216381	4	0.000307493	8	0.00114966	7	1.62e-06	3
SPBC28F2.11	SPBC28F2.11	HMG box protein	0	V	0.00693515	2	0.000249427	2	0	1
rpb1	SPBC28F2.12	RNA polymerase II large subunit Rpb1	23	E	0.0114052	23	0.0136043	155	0.0139341	99	0.0105441	57
ccr1	SPBC29A10.01	NADPH-cytochrome p450 reductase	0	V			0.000241011	11	0	2
pcf1	SPBC29A10.03c	CAF assembly factor	1	V	0	1	0.000110798	7	5.94309e-06	6	0	2
psm1	SPBC29A10.04	mitotic cohesin complex subunit Psm1	17	E	0.000233208	3	0.000676648	21	0.000353812	11	0.000650591	5
exo1	SPBC29A10.05	exonuclease I Exo1	19	V			1.20508e-05	11	2.03101e-05	6	5.15926e-05	4
gas2	SPBC29A10.08	1,3-beta-glucanosyltransferase Gas2	1	V	0	1	0	1	0	1
atp7	SPBC29A10.13	F0-ATPase subunit D	0	V			0.000775641	30	4.05276e-05	10	0	1
rec8	SPBC29A10.14	meiotic cohesin complex subunit Rec8	58	V	0.00319966	6	0.00127962	38	0.00193412	33	0.00257852	4
orc1	SPBC29A10.15	origin recognition complex subunit Orc1	26	E	0.00197165	13	0.000218444	35	0.000370725	32	0.00206972	26
ccc2	SPBC29A3.01	copper transporting ATPase Ccc2	1	V	0	1	0.00405814	43	0.000664639	2	0	1
his7	SPBC29A3.02c	phosphoribosyl-AMP cyclohydrolase/phosphoribosyl-ATP pyrophosphohydrolase His7	6	V			5.56949e-06	10	6.35333e-05	8	0	2
rpl8	SPBC29A3.04	60S ribosomal protein L7a/L8	0	E	0.00221799	7	0.00151455	206	0.00479652	138	0.000440719	45
vps71	SPBC29A3.05	Swr1 complex subunit Vps71	0	V			0.000282991	21	0	14	3.10554e-05	10
SPBC29A3.06	SPBC29A3.06	CGI-48 family	0	E			0.00045663	118	0.000100853	32	0	5
sab14	SPBC29A3.07c	U2 snRNP-associated protein SF3B14 ortholog	0	V	3.05315e-05	5	0.000116361	44	2.24131e-05	37	0.000298575	25
SPBC29A3.09c	SPBC29A3.09c	AAA family ATPase Gcn20	0	V			5.69478e-05	7	0	1
rps902	SPBC29A3.12	40S ribosomal protein S9	0	V	0.000221594	2	0.000174161	138	0.000299264	19
pdp1	SPBC29A3.13	PWWP domain protein Pdp1	1	V	0	1	0	1	0	1
trt1	SPBC29A3.14c	telomerase reverse transcriptase 1 protein Trt1	16	V	0	1	0.00170554	11	0.00238167	6	0.000854821	2
rrs1	SPBC29A3.16	ribosome biogenesis protein Rrs1	0	E	0.00898226	5	0.00306563	184	0.000943648	26	0	2
cyt1	SPBC29A3.18	cytochrome c1 Cyt1	0	V			0.00123046	62	0.00302061	27	0.00149472	8
atf1	SPBC29B5.01	transcription factor, Atf-CREB family Atf1	101	V	0.00820825	10	0.00264942	29	0.00961313	24	0.00581398	5
rpl26	SPBC29B5.03c	60S ribosomal protein L26	0	V	0.000271298	3	0.000552282	176	0.00176087	141	0.00105998	74
tvp23	SPBC2A9.05c	Golgi transport protein Tvp23	0	V	0	1	0.000254946	6	0	2
sec22	SPBC2A9.08c	SNARE Sec22	0	E			0.00268525	34	0.000977997	12	0	3
orc6	SPBC2A9.12	origin recognition complex subunit Orc6	2	E	3.56847e-05	7	0	7	0	7	0	6
rep1	SPBC2D10.06	MBF transcription factor complex subunit Rep1	11	V			0.000112911	12	4.15776e-06	7
SPBC2D10.08c	SPBC2D10.08c	mitochondrial ribosomal protein subunit Yml6	0	E			0.000232779	75	0.000130227	47	0.000119972	21
fib1	SPBC2D10.10c	fibrillarin	1	V	0.000221594	2	0.0169584	338	0.00922991	86	0.0619948	32
rhp23	SPBC2D10.12	Rad23 homolog Rhp23	12	V	0.00439021	8	0.00478547	66	0.00527043	31	0.0277497	19
est1	SPBC2D10.13	telomerase regulator Est1	5	V	0.00108224	3	0	1	0	1	0	1
pth1	SPBC2D10.15c	mitochondrial peptidyl-tRNA hydrolase Pth1	0	V			0.00115792	56	0.00149295	6
clr1	SPBC2D10.17	cryptic loci regulator Clr1	12	V			0.000714295	10	0.000362442	5	0	2
abc1	SPBC2D10.18	ABC1 kinase family ubiquinone biosynthesis protein Abc1/Coq8	9	V			0.000626254	12	8.69801e-08	3
mrpl7	SPBC2F12.02c	mitochondrial ribosomal protein subunit L7	0	E			0.000491289	60	6.44462e-05	33	0	9
rpl1701	SPBC2F12.04	60S ribosomal protein L17	0	V			0.000212617	165	0.000127511	71	2.68534e-05	13
SPBC2F12.05c	SPBC2F12.05c	sterol binding ankyrin repeat protein	0	V	0	1	0.000239622	5	0	1
rpl802	SPBC2F12.07c	60S ribosomal protein L8	0	V	0	2	0.000101693	140	1.38282e-05	43	0	3
ceg1	SPBC2F12.08c	mRNA guanylyltransferase Ceg1	7	E	7.48187e-05	2	0.000626717	35	0	24	2.53155e-07	5
atf21	SPBC2F12.09c	transcription factor, Atf-CREB family Atf21	4	V			4.8893e-06	3	0	2
rep2	SPBC2F12.11c	transcriptional activator, MBF subunit Rep2	9	V	0	2	1.51457e-05	7	4.05953e-05	7	0	3
klp5	SPBC2F12.13	kinesin-like protein Klp5	15	V	0.000682332	6	0.00115803	55	0.00300487	54	0.0445635	15
gua1	SPBC2F12.14c	IMP dehydrogenase Gua1	0	E			0.00302773	107	0.00045672	13	0.000398256	3
liz1	SPBC2G2.01c	pantothenate transporter Liz1	2	V			2.86867e-06	2	2.19943e-05	2
sbh1	SPBC2G2.03c	translocon beta subunit Sbh1	2	V			0.000443331	17	0.000317198	5	0	1
rpl1603	SPBC2G2.05	60S ribosomal protein L13/L16	0	V			0.000222575	167	0.000591958	80	0.00058334	58
ade9	SPBC2G2.08	C-1-tetrahydrofolatesynthase/methylenetetrahydrofolatedehydrogenase/methylenetetrahydrofolatecyclohydrolase/ formyltetrahydrofolatesynthetase	0	V			2.07864e-05	19	0.00027389	15	0.000977511	11
hrs1	SPBC2G2.12	mitochondrial and cytoplasmic histidine-tRNA ligase Hrs1	3	E			0.00114295	85	0.000855316	8
SPBC2G2.13c	SPBC2G2.13c	deoxycytidylate deaminase	0	V			0.000408741	45	1.61764e-05	4	0	2
SPBC2G2.16	SPBC2G2.16	mannose-6-phosphate isomerase	0	E			0.000551987	25	0.00011557	11	0.0235484	7
ctu1	SPBC2G5.03	cytosolic thiouridylase subunit Ctu1	1	V	0.00108224	2	0.00067027	18	0.000767335	4	0	1
SPBC2G5.05	SPBC2G5.05	transketolase	0	E			0.00237016	77	0.00267558	37	0.0275826	18
rpc25	SPBC2G5.07c	DNA-directed RNA polymerase III complex subunit Rpc25	5	E	0.00216381	3	0.00130507	111	0.00248802	34	0.00113744	18
wsc1	SPBC30B4.01c	transmembrane receptor Wsc1	1	V	0	1	0.000257005	5	0	1
sol1	SPBC30B4.04c	SWI/SNF complex subunit Sol1	0	V	0	4	7.17669e-05	12	0	11	0	6
kap109	SPBC30B4.05	karyopherin Kap109	0	E			0.00275955	61	8.63687e-05	34	0.000180112	11
SPBC30B4.06c	SPBC30B4.06c	mitochondrial GIDA family tRNA uridine 5-carboxymethylaminomethyl modification enzyme	0	V			0.00406269	53	0.00269622	9	0.00221995	4
tfb4	SPBC30B4.07c	transcription factor TFIIH complex subunit Tfb4	0	E	0	1	0.000468612	67	0.000638429	62	0.00029599	19
SPBC30D10.02	SPBC30D10.02	transcription corepressor	0	E			4.58732e-06	9	0	3
swi3	SPBC30D10.04	replication fork protection complex subunit Swi3	18	V	0	2	0.000600758	13	3.68484e-05	11	0	3
SPBC30D10.05c	SPBC30D10.05c	sepiapterin reductase	0	V	0	1	0	1	0	1
lsm4	SPBC30D10.06	U6 snRNP-associated protein Lsm4	1	E			1.27948e-06	16	7.16221e-07	11	0	6
SPBC30D10.07c	SPBC30D10.07c	biotin-protein ligase	0	E			4.24438e-06	3	0	2
tor1	SPBC30D10.10c	phosphatidylinositol kinase Tor1	22	V	0.00420213	10	0.0011244	26	0.00309952	21	0.0114645	11
gpi1	SPBC30D10.11	pig-Q	2	E			5.99984e-05	8	2.46468e-05	7	0	2
pdb1	SPBC30D10.13c	pyruvate dehydrogenase e1 component beta subunit Pdb1	0	V	0	1	0.00269077	67	0.000895965	26	0.00493451	12
pha2	SPBC30D10.16	phrenate dehydratase	1	V			0.000800452	54	0.000450923	11	0.00197782	4
smi1	SPBC30D10.17c	cell wall biosynthesis/ cell cycle regulator	2	E	0	1	0.000600603	7	0.000222017	2
rpl102	SPBC30D10.18c	60S ribosomal protein L10a	0	V			6.26695e-05	150	5.70443e-05	31	0	1
rtn1	SPBC31A8.01c	reticulon-like protein Rtn1	2	V	0	1	0.000310516	3	0	2	0	1
atg2	SPBC31E1.01c	autophagy associated protein Atg2	0	V			0	1	0	1
pmr1	SPBC31E1.02c	P-type ATPase, calcium transporting Pmr1	4	V	0	1	0.000236396	11	0	2	0	1
hub1	SPBC31E1.03	ubiquitin-like protein modifier Hub1	4	E	0.00108224	2	0.00214779	41	0.000120774	5	7.41049e-05	2
pep12	SPBC31E1.04	SNARE Pep12	4	E	0	1	0.000135453	9	0.000216364	5	0.000854821	3
gle1	SPBC31E1.05	RNA export factor, cytoplasmic nucleoporin Gle1	5	E	0	1	0.00203857	40	0.0126172	35	5.21539e-07	6
bms1	SPBC31E1.06	GTP binding protein Bms1	0	E			0.000958499	172	0.00016436	52	0.000519129	20
srb4	SPBC31F10.04c	mediator complex subunit Srb4	5	E	0	4	2.36992e-05	20	0	19	0.000493858	8
sar1	SPBC31F10.06c	ADP-ribosylation factor Sar1	7	E	0.013235	6	0.00157301	11	0.00470975	6	1.35e-07	5
mde2	SPBC31F10.08	Mde2 protein	3	V	0	1	8.92381e-07	7	0	1	0	1
nut2	SPBC31F10.09c	mediator complex subunit Med10	3	V	0	1	0.000549229	32	0.00154001	21	0.00184399	15
cwf4	SPBC31F10.11c	complexed with Cdc5 protein Cwf4	0	E	6.48969e-06	7	0.000437089	33	1.81065e-05	12	0	2
SPBC31F10.12	SPBC31F10.12	RNA-binding protein Tma20	0	V			0.000335673	38	0.00070506	2
hip1	SPBC31F10.13c	hira protein, histone chaperone Hip1	12	V	0.00214842	6	0.00115213	20	0.000740739	7	0.000148234	2
hip3	SPBC31F10.14c	HIRA interacting protein Hip3	4	V	0.00050382	5	0	2	0	2	0	1
atp15	SPBC31F10.15c	F0-ATPase epsilon subunit	0	V			0	2	0	2
ste11	SPBC32C12.02	transcription factor Ste11	117	E	0.00320656	6	0.000360352	13	0.0018443	10	0.00640066	5
rec14	SPBC32F12.02	Ski complex subunit Rec14	7	V	0.00108224	2	0.000894193	13	0.00070506	2	0.000854821	2
gpx1	SPBC32F12.03c	glutathione peroxidase Gpx1	8	V			0.00128254	40	1.84126e-06	4	0	2
gtb1	SPBC32F12.04	gamma-tubulin	3	E	0.000679977	6	0.00123533	20	0.00211369	19	0.00623113	10
cwf12	SPBC32F12.05c	complexed with Cdc5 protein Cwf12	0	V	0	4	3.30633e-07	6	0	1	0	1
pch1	SPBC32F12.06	P-TEFB associated cyclin, cyclin T Pch1	7	V	0.00189613	2	3.46664e-05	8	6.91485e-05	4	0	2
duo1	SPBC32F12.08c	DASH complex subunit Duo1	2	V	0	3	1.64815e-05	47	0	45	3.05161e-06	7
rum1	SPBC32F12.09	CDK inhibitor Rum1	54	V	0.000876408	5	0.000178663	18	0.000573114	18	0.000233925	7
SPBC32F12.10	SPBC32F12.10	phosphoglucomutase	1	E	0	1	0.00102971	30	0.000568857	16	0.0134236	7
tdh1	SPBC32F12.11	glyceraldehyde-3-phosphate dehydrogenase Tdh1	15	V	0.0264449	11	0.000194397	25	5.73061e-07	7	3.72384e-05	5
SPBC32F12.12c	SPBC32F12.12c	Golgi membrane protein involved in vesicle-medated transport	0	V	0	1	4.09143e-05	5	0	1
tfb5	SPBC32F12.15	transcription factor TFIIH complex subunit Tfb5	1	V			4.13971e-05	5	1.05849e-05	2	0	1
nep2	SPBC32H8.02c	NEDD8 protease Nep2	1	V	0.00216485	2	0	1	0	1
SPBC32H8.04c	SPBC32H8.04c	rRNA processing protein Fcf1	0	E			7.68772e-05	97	0.000215884	21
SPBC32H8.05	SPBC32H8.05	conserved fungal protein	0	V	0	1	0.00159954	129	0	1
git5	SPBC32H8.07	heterotrimeric G protein beta subunit Git5	13	V	0.00345573	4	0.00033155	12	0.000183475	5	5.24642e-05	3
cdk9	SPBC32H8.10	P-TEFb-associated cyclin-dependent protein kinase Cdk9	7	E	0.00248543	7	0.00043844	15	6.37561e-05	7	0	2
mei4	SPBC32H8.11	meiotic forkhead transcription factor Mei4	30	V	0.00203476	3	0.00148061	14	0.00094435	4
act1	SPBC32H8.12c	actin Act1	21	E	0.0194772	13	0.0107871	86	0.0345961	71	0.0518854	42
mok12	SPBC32H8.13c	alpha-1,3-glucan synthase Mok12	1	V			0	1	0	1
fbh1	SPBC336.01	DNA helicase I	9	V	0.000698647	2	0.000210253	13	0.00107744	13	9.8835e-06	4
SPBC336.02	SPBC336.02	18S rRNA dimethylase	0	E			0.00808117	209	0.00306018	55	6.9782e-05	8
efc25	SPBC336.03	Ras1 guanyl-nucleotide exchange factor Efc25	2	V			5.08801e-05	4	6.22122e-05	2
cdc6	SPBC336.04	DNA polymerase delta catalytic subunit Cdc6	69	E	0	2	0.00362108	75	0.00340147	35	0.00211042	17
sfc3	SPBC336.07	transcription factor TFIIIC complex B box binding subunit Sfc3	1	E	3.29348e-07	3	4.20923e-05	4	9.08831e-05	4	0.00042714	3
spc24	SPBC336.08	spindle pole body protein Spc24	4	E	0	7	3.4252e-05	48	5.11514e-05	48	6.12804e-05	9
rrn7	SPBC336.09c	RNA polymerase I upstream activation factor complex subunit Rrn7	3	E	0	1	1.01943e-05	6	0	2	0	1
tif512	SPBC336.10c	translation elongation factor eIF5A	0	V			0.000116891	6	0	1
cdc10	SPBC336.12c	MBF transcription factor complex subunit Cdc10	117	E	0.0011119	5	0.00339273	32	0.00695421	31	0.00103416	7
pic1	SPBC336.15	INCENP, Pic1	2	E	0	2	4.71984e-05	28	0.000141919	28	0	2
cct8	SPBC337.05c	chaperonin-containing T-complex theta subunit Cct8	1	E	0	1	8.12448e-05	19	4.63107e-05	17	5.6685e-05	12
cwf15	SPBC337.06c	complexed with Cdc5 protein Cwf15	0	E	2.8171e-06	7	0	1	0	1	0	1
ubi4	SPBC337.08c	ubiquitin	1	V	0.00106169	3	0.00438388	34	0	1
erg28	SPBC337.09	Erg28 protein	2	V	0	1	0.000383894	16	0.00328052	10	4.5e-07	3
gtr1	SPBC337.13c	Gtr1/RagA G protein Gtr1	0	V			0.000778789	17	2.11081e-05	2
rpb4	SPBC337.14	DNA-directed RNA polymerase II complex subunit Rpb4	16	E	0.000230041	5	0.0013321	94	0.00298984	84	0.0012696	32
coq7	SPBC337.15c	ubiquinone biosynthesis protein Coq7	1	V			0.000790176	19	4.17804e-06	4	2.16e-06	2
alg6	SPBC342.01c	glucosyltransferase Alg6	4	V			0.00117626	18	0.00132281	4	0.00596395	3
qrs1	SPBC342.02	cytoplasmic glutaminyl-tRNA ligase Qrs1	0	E	0	1	0.000368155	81	0.000159879	7	0	1
rpn1301	SPBC342.04	19S proteasome regulatory subunit Rpn13a	0	V	0	2	0	8	0	8	0	3
crb2	SPBC342.05	DNA repair protein Rad9 homolog, Rhp9	43	V	0.0119929	13	0.000844509	31	0.00217626	28	0.000712837	4
sec61	SPBC354.02c	translocon alpha subunit Sec61	2	E	0	1	0.00266298	61	0.00242401	29	0	1
swd3	SPBC354.03	WD repeat protein Swd3	0	V	0	9	2.43465e-05	8	0	7	0	7
sre2	SPBC354.05c	membrane-tethered transcription factor	0	V	0	1	0	1	0	1
mrps16	SPBC354.06	mitochondrial ribosomal protein subunit S16	0	E			0.0030931	94	0.000970085	22	0	5
def1	SPBC354.10	RNAPII degradation factor Def1	4	V	0	1	2.44618e-05	2	0.00043859	2
gpd3	SPBC354.12	glyceraldehyde 3-phosphate dehydrogenase Gpd3	0	V	0	1	2.00469e-05	23	5.73061e-07	7	3.72384e-05	5
vac8	SPBC354.14c	vacuolar protein Vac8	0	V			0.00161891	15	0	1
SPBC359.01	SPBC359.01	amino acid permease	0	V	0	1	0	1	0	1
alr2	SPBC359.02	alanine racemase Alr2	0	E			2.09423e-06	3	0	1
aat1	SPBC359.03c	amino acid transporter Aat1	3	V	0	1	4.92175e-05	5	0	1
abc3	SPBC359.05	ABC transporter Abc3, unknown specificity	2	V			0	2	0	2
mug14	SPBC359.06	adducin	0	V			1.45423e-05	8	0	1
cys11	SPBC36.04	cysteine synthase	2	V			0.000288783	31	0.000640147	15	0.0036029	7
clr6	SPBC36.05c	histone deacetylase	27	E	0.00456941	9	0.00300267	42	0.00566287	31	0.00365707	11
spo9	SPBC36.06c	farnesyl pyrophosphate synthetase	1	V	0.000499951	4	0.000110231	7	0.00115386	7	0.000106945	4
iki3	SPBC36.07	elongator subunit Iki3	0	V			0.000956545	60	0.000295823	5	0	2
sap61	SPBC36.09	U2 snRNP-associated protein sap61	0	E	0.00313449	9	0.000781945	32	0.00203136	6	0	4
SPBC36.11	SPBC36.11	sequence orphan	0	V	0	1	0	1	0	1
git7	SPBC36.12c	SGT1-like protein Git7	4	E			0.000101015	9	1.58035e-05	3
cox10	SPBC365.02c	protoheme IX farnesyltransferase	0	V			0.000504469	27	0.000714425	17	0.0177515	6
rpl2101	SPBC365.03c	60S ribosomal protein L21	0	V	0.000271298	3	0.000131694	131	0	11
SPBC365.04c	SPBC365.04c	RNA-binding protein, involved in ribosome biogenesis	0	V	0	1	3.15359e-06	47	0	1
slu7	SPBC365.05c	splicing factor Slu7	0	V	0	1	0	1	0	1	0	1
pmt3	SPBC365.06	SUMO	9	V	0.000535745	4	0.0144292	87	0.00132432	11	0.00170856	4
arp5	SPBC365.10	actin-like protein Arp5	0	V			0.000149939	14	0	12	0	7
uge1	SPBC365.14c	UDP-glucose 4-epimerase Uge1	2	V			0.00151561	51	0.000969608	10	0	3
alp4	SPBC365.15	gamma tubulin complex Spc97/GCP2 subunit Alp4	10	E	0.00123701	9	0.0010774	15	0.00120115	13	0.00260719	8
pnc1	SPBC365.20c	nicotinamidase Pnc1	0	V			0.000568876	24	0	1
sec63	SPBC36B7.03	ER protein translocation subcomplex subunit Sec63	0	V			3.80409e-06	6	0	2
SPBC36B7.04	SPBC36B7.04	tRNA dihydrouridine synthase Dus1	0	V			0.000264636	131	0	2
mug20	SPBC36B7.06c	sequence orphan	1	V	0	1	1.31188e-05	6	0	1	0	1
tlg1	SPBC36B7.07	SNARE Tgl1	1	E	0	1	0.00115503	14	1.16216e-06	5	0	3
gcn2	SPBC36B7.09	eIF2 alpha kinase Gcn2	10	E			0.000130631	22	0.00214007	5
arh1	SPBC3B8.01c	NADPH-adrenodoxin reductase Arh1	3	E			4.04052e-05	9	0	1
php5	SPBC3B8.02	CCAAT-binding factor complex subunit Php5	4	V			0.00010538	8	0.0014096	3
SPBC3B8.03	SPBC3B8.03	saccharopine dehydrogenase	0	V	0	1	0.000658353	18	0.00589588	9	0.0017091	3
SPBC3B8.05	SPBC3B8.05	diphthamide biosynthesis protein Dph1	5	V			0.000462651	126	0.000130542	4
dsd1	SPBC3B8.07c	dihydroceramide delta-4 desaturase	0	V			0	1	0	1
SPBC3B8.09	SPBC3B8.09	U3 snoRNP-associated protein Utp3	0	E			4.6395e-05	120	7.73627e-05	22
nem1	SPBC3B8.10c	Nem1-Spo7 phosphatase complex catalytic subunit Nem1	0	V			4.70696e-05	4	0	2
cwf28	SPBC3B9.02c	splicing factor Cwf28	0	E	0	1	0	1	0	1	0	1
SPBC3B9.03	SPBC3B9.03	signal recognition particle receptor alpha subunit Srp101	0	E			0.000664426	54	3.98683e-05	48	0.000478806	9
atg3	SPBC3B9.06c	autophagy associated protein Atg3	0	V			0.000216504	10	0	3	0	2
rpa43	SPBC3B9.07c	DNA-directed RNA polymerase I complex subunit Rpa43	6	E	0	1	0.000103245	34	0.000155097	13	0.000297969	4
mnh1	SPBC3B9.08c	Mago-nashi homolog	0	V			0.000522717	17	0	1	0	1
vps36	SPBC3B9.09	ESCRT II complex subunit Vps36	0	V			4.78955e-05	3	0	1
vti1	SPBC3B9.10	SNARE Vti1	1	E	0	1	0.00162993	25	0.000327281	12	0.00681805	7
ctf1	SPBC3B9.11c	mRNA cleavage and polyadenylation specificity factor complex subunit Ctf1	0	V	0.000522187	3	3.35219e-05	12	9.21775e-05	12	0	2
trs23	SPBC3B9.12	TRAPP complex subunit Trs23	0	E			4.34953e-08	5	0	2
rpp102	SPBC3B9.13c	60S acidic ribosomal protein Rpp1-2	0	V	0	1	4.01062e-05	68	0.00013984	50	3.78e-08	41
scp1	SPBC3B9.15c	Sre1 cleavage activating protein, Scap Scp1	7	V	0	1	2.57546e-05	4	0	2	0	2
nup120	SPBC3B9.16c	nucleoporin Nup120	2	E	0	2	0	33	0	33	6.89144e-07	8
isa2	SPBC3B9.17	iron-sulfur protein Isa2	1	E			3.15274e-05	8	2.13884e-05	2	0	1
vma7	SPBC3B9.18c	V-type ATPase V1 subunit F	0	E			0.000230088	18	0	13	0	11
mge1	SPBC3B9.19	mitochondrial GrpE domain chaperone protein	0	E			0.00226295	61	0.00337194	21	8.31601e-05	7
dcp1	SPBC3B9.21	mRNA decapping complex regulatory subunit Dcp1	7	E	0	1	0	1	0	1	0	1
dad4	SPBC3B9.22c	DASH complex subunit Dad4	0	V			0.000322756	47	0	45	0	1
but2	SPBC3D6.02	But2 family protein But2	1	V	0	2	0	3	0	2	0	2
mad1	SPBC3D6.04c	mitotic spindle checkpoint protein Mad1	16	V	0	1	0.000206883	58	0.000646993	57	6.75001e-08	5
ptp4	SPBC3D6.05	phosphatidate cytidylyltransferase Ptp4	1	V			0.000287465	8	0	1
prs5	SPBC3D6.06c	ribose-phosphate pyrophosphokinase Prs5	0	V			3.10944e-05	18	0.000391655	12	0.00166688	5
gpi3	SPBC3D6.07	pig-A, phosphatidylinositol N-acetylglucosaminyltransferase subunit Gpi3	1	E			0.00133626	11	2.46468e-05	7	0.00042714	4
lsm1	SPBC3D6.08c	mRNA decapping complex subunit	2	V			0.000747743	38	3.73869e-05	10	5.84015e-06	7
dpb4	SPBC3D6.09	DNA polymerase epsilon subunit Dpb4	1	V	0	1	1.86895e-05	7	0	4	0	2
apn2	SPBC3D6.10	AP-endonuclease Apn2	12	V			0.000113796	17	0.000138991	8	6.29265e-05	2
slx8	SPBC3D6.11c	SUMO-targeted ubiquitin-protein ligase E3 Slx8	2	E	0.000728898	3	0	2	0	2	0	1
SPBC3D6.12	SPBC3D6.12	U3 snoRNA associated protein Dip2	0	E			0.000823847	183	0.000243863	55	0.000440733	21
pdi2	SPBC3D6.13c	ER associated protein disulfide isomerase Pdi2	2	V	0	1	0.000429366	2	0	1
rps2501	SPBC3D6.15	40S ribosomal protein S25	0	V	0	1	5.48918e-05	116	3.42537e-06	9
fab1	SPBC3E7.01	1-phosphatidylinositol-3-phosphate 5-kinase Fab1	19	V			0.00125873	14	0.00505264	9	0	2
hsp16	SPBC3E7.02c	heat shock protein Hsp16	9	V	0.0100943	11	0.00229942	20	0.00489413	9
rad13	SPBC3E7.08c	DNA repair nuclease Rad13	21	V			0.00280419	67	0.0126738	64	0.0135456	29
fma1	SPBC3E7.10	methionine aminopeptidase Fma1	0	V			0.00279096	113	0.0013956	36
syf2	SPBC3E7.13c	splicing factor, SYF2 family	0	E	0	4	3.46698e-06	6	0	2	0	1
smf1	SPBC3E7.14	Sm snRNP core protein Smf1	1	E	0.000171149	6	0.000611112	57	0.000417784	40	0.00189119	29
lac1	SPBC3E7.15c	sphingosine N-acyltransferase Lac1	1	V	0	1	2.84543e-05	2	0	1	0	1
leu3	SPBC3E7.16c	2-isopropylmalate synthase Leu3	2	V			2.39893e-05	17	0.000378194	10	0	3
SPBC3F6.02c	SPBC3F6.02c	3 beta-hydroxysteroid dehydrogenase/delta 5-->4-isomerase	0	E	0	1	0.00103703	23	0.00312885	11	4.5e-07	3
trr1	SPBC3F6.03	thioredoxin reductase Trr1	7	V			0.00331987	63	0.0018367	6	0.00934903	3
nop14	SPBC3F6.04c	U3 snoRNP protein Nop14	0	E			2.32219e-05	111	3.82706e-07	29	0	2
rga1	SPBC3F6.05	Rho-type GTPase activating protein Rga1	3	V	0.000762493	2	0.000214619	10	2.86416e-05	6	0	4
[truncated: 773 more rows]
