# Supplementary material for: Linkers of Cell Polarity and Cell Cycle Regulation in the Fission Yeast Protein Interaction Network
Source: PLoS Comput Biol. 2012 Oct 18;8(10):e1002732. doi: 10.1371/journal.pcbi.1002732 (PMC3475659; doi:10.1371/journal.pcbi.1002732)
Supplement: Table S2 — Analysis of the genome-wide budding yeast network. Tabulated file (in .xls format) containing network measures for all protein in the largest connected component of the genome-wide network of fission (S1) and budding (S2) yeast. Columns include: Common name: Common name. Systematic name: Systematic name (for fission yeast), GO database ID (for budding yeast) Description: Brief description of known protein activity. PubMed count: Number of abstracts discussing that particular protein in fission yeast available in PubMed. Lethality: E (Essential) If deletion of the gene causes lethality, V (Viable) otherwise. Scores: Betweenness Centrality and Degree scores for the protein in the network using either STRING interaction data (at increasing cutoffs, 0.4, 0.7, 0.9) or data from BioGRID (only the physical protein-protein interaction data). Genes with no entry at a given cutoff have no other interactions with any proteins in the network. (XLS) [file pcbi.1002732.s008.xls]

## Sheet: Sheet1
Common name	Systematic name	Alternative name	Description	PubMed	Lethality	BioGRID Physical		STRING
				count	Essential - Viable	BC	Degree	Cutoff = 0.4		Cutoff = 0.7		Cutoff = 0.9
								BC	Degree	BC	Degree	BC	Degree
TFC3	S000000001	YAL001C	Subunit of TFIIIC RNA pol III transcription initiation factor complex	6	E	0.000429028	22	0.000108921	89	0.000366026	71	0.000193372	25
VPS8	S000000002	YAL002W	Membrane-binding component of the CORVET complex	13	V	2.28413e-05	12	9.00184e-05	59	0.000185475	19	4.25341e-05	7
EFB1	S000000003	YAL003W	Translation elongation factor 1 beta	3	E	7.73132e-06	15	0.000148063	226	0.000303068	93	0.000248321	17
SSA1	S000000004	YAL005C	ATPase involved in protein folding and nuclear localization signal (N	130	V	0.00531684	235	0.0010403	160	0.00160053	72	0.00234534	25
ERP2	S000000005	YAL007C	Protein that forms a heterotrimeric complex with Erp1p	0	V	0.000253866	46	0.000104659	64	0.00074316	28	0.00177112	8
FUN14	S000000006	YAL008W	Mitochondrial protein of unknown function	0	V	1.46157e-06	4	1.69713e-06	5	2.55504e-06	2
SPO7	S000000007	YAL009W	Putative regulatory subunit of Nem1p-Spo7p phosphatase holoenzyme	13	V	3.57631e-05	9	7.24154e-05	51	0.00042429	38	7.71743e-05	6
MDM10	S000000008	YAL010C	Subunit of both the ERMES complex that links the ER to mitochondria	21	V	5.07139e-05	13	7.26224e-05	38	0.000614168	24	0.00108407	14
SWC3	S000000009	YAL011W	Protein of unknown function	3	V	0.000117723	25	0.000347162	154	0.000397029	61	0.000396963	25
CYS3	S000000010	YAL012W	Cystathionine gamma-lyase	23	V	1.46079e-05	12	0.000486131	94	0.000306228	34	0.00170267	15
DEP1	S000000011	YAL013W	Transcriptional modulator	2	V	2.009e-05	17	0.000129632	95	0.000320381	40	0.000549921	18
SYN8	S000000012	YAL014C	Endosomal SNARE related to mammalian syntaxin 8	0	V	4.98324e-07	7	1.5519e-05	17	2.91005e-05	10	0.000361048	5
NTG1	S000000013	YAL015C	DNA N-glycosylase and apurinic/apyrimidinic (AP) lyase	41	V	5.7715e-05	16	0.000212771	99	0.000783837	84	0.000550568	13
TPD3	S000000014	YAL016W	Regulatory subunit A of the protein phosphatase 2A (PP2A) complex	18	V	0.00021952	43	0.000119191	63	0.000307076	31	0.000864046	18
PSK1	S000000015	YAL017W	One of two (see also PSK2) PAS domain containing S/T protein kinases	6	V	0.000143422	38	0.000277611	51	0.000434785	27	0.000261489	6
YAL018C	S000000016	YAL018C	Putative protein of unknown function	0	V	1.30007e-05	10	3.31415e-06	6	0	1
FUN30	S000000017	YAL019W	ATPase of the Snf2p family with chromatin remodeling activity	6	V	1.32739e-05	14	6.49612e-05	60	3.77023e-05	9	3.67179e-05	2
ATS1	S000000018	YAL020C	Protein required for modification of wobble nucleosides in tRNA	5	V	4.94306e-06	7	3.01714e-05	35	5.96992e-06	7	8.62778e-06	3
CCR4	S000000019	YAL021C	Component of the CCR4-NOT transcriptional complex	94	V	0.000236651	53	0.000467179	142	0.00135708	89	0.00184325	29
PMT2	S000000021	YAL023C	Protein O-mannosyltransferase	20	V	6.80901e-05	21	0.000368857	102	0.00106583	38	0.00143417	9
LTE1	S000000022	YAL024C	Protein similar to GDP/GTP exchange factors but no detectable activity	46	V	0.000174279	67	0.000215087	105	0.000659554	55	0.000720368	23
MAK16	S000000023	YAL025C	Essential nuclear protein	11	E	2.59582e-05	16	0.00052441	367	0.000188858	202	2.57045e-05	91
DRS2	S000000024	YAL026C	Trans-golgi network aminophospholipid translocase (flippase)	32	V	3.9905e-05	33	0.000729914	144	0.00239608	58	0.00237183	13
SAW1	S000000025	YAL027W	Protein involved in removing 3'-nonhomologous tails during DSB repair	1	V	9.88433e-05	31	3.36566e-05	35	0.000189493	25	0.000421475	11
FRT2	S000000026	YAL028W	Tail-anchored ER membrane protein	1	V	0.000183315	35	4.01158e-05	20	0.000133938	11	0.000103914	2
MYO4	S000000027	YAL029C	Type V myosin motor involved in actin-based transport of cargos	38	V	4.40504e-05	37	0.000155145	72	0.000745782	41	0.000949749	15
SNC1	S000000028	YAL030W	Vesicle membrane receptor protein (v-SNARE)	41	V	0.000115934	22	0.0002595	83	0.000861909	49	0.00227046	24
GIP4	S000000029	YAL031C	Cytoplasmic protein that regulates protein phosphatase 1 Glc7p	1	V	1.85133e-05	7	5.35828e-05	21	2.06356e-05	6	0	1
PRP45	S000000030	YAL032C	Protein required for pre-mRNA splicing	3	E	0.000335095	73	0.000156844	69	0.000172479	35	0.00121572	28
POP5	S000000031	YAL033W	Subunit of both RNase MRP and nuclear RNase P	1	E	0.000413759	13	7.46866e-05	23	1.70071e-07	13	3.86098e-08	9
MTW1	S000000032	YAL034W-A	Essential component of the MIND kinetochore complex	13	V	0.000148968	39	5.43909e-05	60	0.000110864	55	3.28203e-05	22
FUN12	S000000033	YAL035W	GTPase	10	V	0.000207756	71	0.0002534	205	0.000524696	93	0.000547322	51
RBG1	S000000034	YAL036C	Member of the DRG family of GTP-binding proteins	3	V	4.6498e-05	23	0.000355748	353	0.000739949	188	0.00205676	57
CDC19	S000000036	YAL038W	Pyruvate kinase	8	E	0.000214976	57	0.00119337	189	0.0024482	107	0.00375561	31
CYC3	S000000037	YAL039C	Cytochrome c heme lyase (holocytochrome c synthase)	16	V	4.27889e-07	4	2.8901e-05	24	7.80416e-05	10	3.91963e-05	4
CLN3	S000000038	YAL040C	G1 cyclin involved in cell cycle progression	192	V	3.00721e-05	10	0.000295208	109	0.000805032	54	0.000445841	17
CDC24	S000000039	YAL041W	Guanine nucleotide exchange factor for Cdc42p	104	E	0.000503306	39	0.000788593	130	0.000950992	64	0.00116063	24
ERV46	S000000040	YAL042W	Protein localized to COPII-coated vesicles	3	V	5.31201e-05	17	6.01599e-05	49	0.000117857	13	0.000872956	9
PTA1	S000000041	YAL043C	Subunit of holo-CPF	14	E	0.000318767	44	0.000332755	43	0.000692882	36	0.000794484	23
GCV3	S000000042	YAL044C	H subunit of the mitochondrial glycine decarboxylase complex	7	V	4.15574e-06	4	7.3764e-05	49	8.37173e-06	10	0.000119478	6
AIM1	S000000044	YAL046C	Protein involved in mitochondrial function or organization	0	V	1.55169e-05	5	4.70688e-06	5	5.60558e-06	2
SPC72	S000000045	YAL047C	Component of the cytoplasmic Tub4p (gamma-tubulin) complex	15	V	6.16652e-05	27	7.64041e-05	47	0.000168454	27	0.000367651	10
GEM1	S000000046	YAL048C	Tail-anchored outer mitochondrial membrane GTPase	6	V	7.81637e-06	7	0.000339191	72	0.00553469	61	0.000111797	7
AIM2	S000000047	YAL049C	Cytoplasmic protein involved in mitochondrial function or organization	0	V	7.46833e-08	2	3.38147e-06	5	1.3588e-06	2
OAF1	S000000048	YAL051W	Oleate-activated transcription factor	20	V	3.20647e-05	15	9.57171e-05	36	0.000796741	19	4.29363e-05	4
FLC2	S000000049	YAL053W	Putative FAD transporter	1	V	0.000126111	29	7.83243e-05	36	0.000637682	25	0.000308096	6
ACS1	S000000050	YAL054C	Acetyl-coA synthetase isoform	25	V	0.000230194	5	0.000182425	66	0.00118692	39	0.00140224	18
PEX22	S000000051	YAL055W	Putative peroxisomal membrane protein involved in protein import	4	V	6.44134e-07	5	2.08034e-05	22	2.44033e-05	10	3.07386e-08	3
GPB2	S000000052	YAL056W	Multistep regulator of cAMP-PKA signaling	9	V	3.26611e-06	7	1.21548e-05	26	0.000845573	19	1.88136e-05	6
CNE1	S000000054	YAL058W	Calnexin	10	V	0	1	6.17926e-05	59	8.79447e-05	17	0.000804387	8
ECM1	S000000055	YAL059W	Pre-ribosomal factor involved in 60S ribosomal protein subunit export	3	V	0.000367458	24	0.000572094	300	0.00129677	179	0.00162352	49
BDH1	S000000056	YAL060W	NAD-dependent (R,R)-butanediol dehydrogenase	5	V	1.24974e-05	8	0.000123013	72	5.33657e-05	13	0	1
BDH2	S000000057	YAL061W	Putative medium-chain alcohol dehydrogenase with similarity to BDH1	2	V	1.23124e-06	4	0.000151096	104	0.000569025	38	0.000419362	2
GDH3	S000000058	YAL062W	NADP()-dependent glutamate dehydrogenase	8	V	0.000232356	13	0.000281166	80	0.000878655	54	0.000374423	11
FLO9	S000000059	YAL063C	Lectin-like protein with similarity to Flo1p	7	V	0	1	3.71368e-05	14	0.000393968	5	2.78085e-05	2
SEO1	S000000062	YAL067C	Putative permease	1	V	9.50545e-07	4	4.96122e-07	6	2.51991e-05	4
NUP60	S000000063	YAR002W	Subunit of the nuclear pore complex (NPC)	11	V	6.92489e-05	30	0.000490143	162	0.00129531	107	0.00349595	52
SWD1	S000000064	YAR003W	Subunit of the COMPASS (Set1C) complex	7	V	9.80329e-05	18	0.00020063	120	0.000247727	49	0.0012229	22
RFA1	S000000065	YAR007C	Subunit of heterotrimeric Replication Protein A (RPA)	43	E	0.000652701	93	0.00083056	198	0.00143447	115	0.00488671	65
SEN34	S000000066	YAR008W	Subunit of the tRNA splicing endonuclease	3	E	0	2	5.01323e-06	14	1.51553e-06	7	0	3
YAR009C	S000000067	YAR009C, YARCTyB1-1	Retrotransposon TYA Gag and TYB Pol genes	0	V	7.54385e-06	7	8.53075e-05	18	0	12	1.17508e-08	8
YAR010C	S000000068	YARCTyA1-1, YAR010C	Retrotransposon TYA Gag gene co-transcribed with TYB Pol	0	V	9.58976e-05	22	0.000386362	34	0.00260656	19	0	5
BUD14	S000000069	YAR014C	Protein involved in bud-site selection	6	V	0.000950711	74	0.00104003	154	0.000894972	46	0.001568	16
ADE1	S000000070	YAR015W	N-succinyl-5-aminoimidazole-4-carboxamide ribotide (SAICAR) synthetase	73	V	7.25509e-06	7	0.000192839	67	6.68432e-05	18	2.46784e-05	8
KIN3	S000000071	YAR018C	Nonessential serine/threonine protein kinase	8	V	3.54319e-05	23	0.000214207	56	0.000261325	13	0.000419362	3
CDC15	S000000072	YAR019C	Protein kinase of the Mitotic Exit Network	83	E	0.0005145	52	0.000281356	82	0.000541866	58	0.000734025	24
PAU7	S000000073	YAR020C	Member of the seripauperin multigene family	0	V			5.01716e-05	37	0.000185608	27	0.00255852	18
UIP3	S000000075	YAR027W	Putative integral membrane protein of unknown function	1	V	0.0012032	61	0.00079554	39	0.000572784	9	0.00178877	8
YAR028W	S000000076	YAR028W	Putative integral membrane protein	0	V	6.76831e-05	15	2.08875e-05	9	5.68024e-06	3	0.000108102	3
PRM9	S000000078	YAR031W	Pheromone-regulated protein with a motif involved in COPII binding	0	V	4.23525e-05	10	4.89654e-06	6	0	1	0	1
MST28	S000000079	YAR033W	Putative integral membrane protein	1	V	2.48044e-05	12	0.000207019	21	3.44614e-05	3	1.59228e-05	2
YAT1	S000000080	YAR035W	Outer mitochondrial carnitine acetyltransferase	6	V	1.36014e-05	4	4.22335e-05	19	3.65995e-05	6	1.77343e-05	3
SWH1	S000000081	YAR042W	Protein similar to mammalian oxysterol-binding protein	5	V	8.70494e-05	24	0.000117514	46	0.000543517	18	0.000191874	5
FLO1	S000000084	YAR050W	Lectin-like protein involved in flocculation	92	V	0	2	9.54544e-05	19	4.12252e-05	4	0	1
YAR064W	S000000089	YAR064W	Putative protein of unknown function	0	V	0	1	0	1	0	1
YAR068W	S000000091	YAR068W	Fungal-specific protein of unknown function	2	V	0	1	2.07888e-05	16	0.000364163	4	0	3
PHO11	S000000094	YAR071W	One of three repressible acid phosphatases	14	V	0.000345296	5	3.64108e-05	28	0.000125578	11	0.000419362	2
ECM15	S000000097	YBL001C	Non-essential protein of unknown function	1	V	1.09492e-05	5	1.28401e-05	11	4.92478e-06	2
HTB2	S000000098	YBL002W	Histone H2B	11	V	0.0012142	119	0.000376795	138	0.00109276	97	0.000967386	26
HTA2	S000000099	YBL003C	Histone H2A	13	V	0.00218789	222	0.000972835	240	0.00171354	107	0.000676023	33
UTP20	S000000100	YBL004W	Component of the small-subunit (SSU) processome	3	E	0.000217106	69	7.9498e-05	112	0.000281498	89	2.933e-05	52
PDR3	S000000101	YBL005W	Transcriptional activator of the pleiotropic drug resistance network,	92	V	5.01187e-05	11	0.000350708	58	0.000754698	31	0.00186196	12
LDB7	S000000102	YBL006C	Component of the RSC chromatin remodeling complex	3	V	3.54031e-05	10	9.53975e-05	35	0	15	0	8
SLA1	S000000103	YBL007C	Cytoskeletal protein binding protein	50	V	0.00366299	157	0.00392469	255	0.00281321	76	0.0041508	30
HIR1	S000000104	YBL008W	Subunit of the HIR complex	33	V	3.68548e-06	16	0.000130453	72	9.96006e-05	38	0.000139954	17
ALK2	S000000105	YBL009W	Protein kinase	4	V	2.05067e-06	9	4.20201e-05	74	0	2
YBL010C	S000000106	YBL010C	Putative protein of unknown function	0	V	1.61082e-05	9	3.97711e-07	4	4.16014e-06	4
SCT1	S000000107	YBL011W	Glycerol 3-phosphate/dihydroxyacetone phosphate sn-1 acyltransferase	5	V	3.34802e-05	20	7.61002e-05	42	0.000557972	19	4.46119e-05	2
FMT1	S000000109	YBL013W	Methionyl-tRNA formyltransferase	4	V	0	1	2.55153e-05	32	0.000249911	14	0.000416458	3
RRN6	S000000110	YBL014C	Component of the core factor (CF) rDNA transcription factor complex	8	E	0.000144476	15	0.000200287	80	0.00018828	59	0.000738682	9
ACH1	S000000111	YBL015W	Protein with CoA transferase activity	9	V	6.54854e-06	7	5.03723e-05	43	6.24256e-05	20	8.90944e-05	8
FUS3	S000000112	YBL016W	Mitogen-activated serine/threonine protein kinase involved in mating	172	V	0.00133591	120	0.000204442	93	0.000925857	52	0.00203315	26
PEP1	S000000113	YBL017C	Type I transmembrane sorting receptor for multiple vacuolar hydrolases	45	V	0.000148792	31	0.000133781	66	0.000779952	30	0.00178545	11
POP8	S000000114	YBL018C	Subunit of both RNase MRP and nuclear RNase P	1	E	5.08846e-05	10	0.000127158	94	1.78011e-05	16	1.17508e-08	8
APN2	S000000115	YBL019W	Class II abasic (AP) endonuclease involved in repair of DNA damage	22	V	4.6797e-07	3	2.19169e-05	30	2.44417e-05	19	0.000155855	10
RFT1	S000000116	YBL020W	Membrane protein required for translocation of Man5GlcNac2-PP-Dol	4	E	3.38147e-06	7	7.05605e-05	22	0.000166736	9	0	1
HAP3	S000000117	YBL021C	Subunit of the Hap2p/3p/4p/5p CCAAT-binding complex	49	V	2.62103e-05	8	0.000351141	31	0.000122153	14	6.249e-05	7
PIM1	S000000118	YBL022C	ATP-dependent Lon protease	27	V	7.6068e-06	12	0.00012929	63	0.000423758	17	0.000521007	4
MCM2	S000000119	YBL023C	Protein involved in DNA replication	124	E	0.000449762	55	0.000196893	105	0.000482937	70	0.00373124	43
NCL1	S000000120	YBL024W	S-adenosyl-L-methionine-dependent tRNA: m5C-methyltransferase	7	V	0.000160295	32	0.000458559	415	0.000801334	223	6.70947e-05	75
RRN10	S000000121	YBL025W	Protein involved in promoting high level transcription of rDNA	9	V	1.67789e-05	8	0.000364296	74	0.000885193	64	2.82767e-05	8
LSM2	S000000122	YBL026W	Lsm (Like Sm) protein	14	E	0.000910533	88	0.000116223	88	0.000666908	74	0.000773725	46
RPL19B	S000000123	YBL027W	Protein component of the large (60S) ribosomal subunit	2	V	7.55686e-05	74	0.000216377	206	0.000149274	151	0.000303717	123
YBL028C	S000000124	YBL028C	Protein of unknown function that may interact with ribosomes	0	V	3.06669e-06	4	0.000178218	359	8.4965e-05	240	0.000122315	126
PET9	S000000126	YBL030C	Major ADP/ATP carrier of the mitochondrial inner membrane	39	E	0.00059423	61	0.000673987	129	0.00530736	78	0.00151728	21
SHE1	S000000127	YBL031W	Mitotic spindle protein that interacts with Dam1 complex components	5	V	3.42965e-05	9	0.000122719	66	0.000602191	45	0.00034661	10
HEK2	S000000128	YBL032W	RNA binding protein involved in asymmetric localization of ASH1 mRNA	9	V	0.106391	1124	0.0790983	1122	0.000514758	35	0.000478958	8
RIB1	S000000129	YBL033C	GTP cyclohydrolase II	9	V	7.1299e-06	5	0.000384394	58	0.000585303	38	0.000419362	4
STU1	S000000130	YBL034C	Component of the mitotic spindle	7	E	6.13775e-05	18	0.000120499	75	0.00017376	45	0.000662285	20
POL12	S000000131	YBL035C	B subunit of DNA polymerase alpha-primase complex	10	E	0.00020351	22	0.000231825	86	0.00029128	52	0.000125622	22
YBL036C	S000000132	YBL036C	Putative non-specific single-domain racemase	1	V	3.53396e-05	13	6.73055e-05	50	2.73586e-05	7
APL3	S000000133	YBL037W	Alpha-adaptin	1	V	2.91147e-05	14	2.09449e-05	22	7.17943e-05	10	0.000312369	6
MRPL16	S000000134	YBL038W	Mitochondrial ribosomal protein of the large subunit	0	V	0.000448532	40	0.000211968	126	0.00168762	78	0.0028601	48
URA7	S000000135	YBL039C	Major CTP synthase isozyme (see also URA8)	13	V	0.00018101	54	0.00124886	608	0.00472552	403	0.00949668	212
ERD2	S000000136	YBL040C	HDEL receptor	19	E	1.23289e-06	8	2.82475e-05	31	5.56255e-05	11	0	1
PRE7	S000000137	YBL041W	Beta 6 subunit of the 20S proteasome	1	E	3.00697e-05	27	4.36767e-05	58	0.000102545	49	0.000583611	37
FUI1	S000000138	YBL042C	High affinity uridine permease	8	V	4.7764e-06	9	0.000119536	42	2.03117e-06	3
ECM13	S000000139	YBL043W	Non-essential protein of unknown function	1	V	0.00027678	13	4.07377e-05	19	2.38988e-06	10
YBL044W	S000000140	YBL044W	Putative protein of unknown function	0	V	7.63487e-07	3	5.49253e-07	4	1.42706e-05	3
COR1	S000000141	YBL045C	Core subunit of the ubiquinol-cytochrome c reductase complex	7	V	0.0003866	42	0.000201313	93	0.000737192	61	0.00677181	41
PSY4	S000000142	YBL046W	Regulatory subunit of protein phosphatase PP4	4	V	1.83484e-05	13	3.11879e-05	23	1.75334e-05	11	9.04081e-05	8
EDE1	S000000143	YBL047C	Key endocytic protein that interacts with other endocytic proteins	10	V	0.000183489	34	0.000471128	75	0.00018657	20	0.000839563	9
MOH1	S000000145	YBL049W	Protein of unknown function	1	V	6.48598e-05	10	0.000321644	39	0.000180502	12	0.000346251	5
SEC17	S000000146	YBL050W	Peripheral membrane protein required for ER/Golgi vesicular transport	37	E	0.000120007	30	0.000151403	75	0.000112038	34	0.000187024	17
PIN4	S000000147	YBL051C	Protein involved in G2/M phase progression and response to DNA damage	5	V	2.09582e-05	12	8.38014e-05	42	0.000150644	24	0.000515502	10
SAS3	S000000148	YBL052C	Histone acetyltransferase catalytic subunit of NuA3 complex	16	V	3.53169e-05	15	9.79879e-05	71	3.19248e-05	21	4.55147e-05	9
TOD6	S000000150	YBL054W	PAC motif binding protein involved in rRNA and ribosome biogenesis	2	V	1.91415e-05	11	0.000628425	305	0.00122783	185	0.00172433	36
YBL055C	S000000151	Tat-D, YBL055C	3'-->5' exonuclease and endonuclease with a possible role in apoptosis	1	V	1.80462e-05	17	2.84719e-07	4	8.65249e-07	2
PTC3	S000000152	YBL056W	Type 2C protein phosphatase (PP2C)	13	V	0.000269618	21	0.000100872	57	0.000148602	21	0.000574085	10
PTH2	S000000153	YBL057C	One of two mitochondrially-localized peptidyl-tRNA hydrolases	4	V	1.28236e-05	13	6.32304e-06	23	1.30932e-05	6	0	1
SHP1	S000000154	YBL058W	UBX domain protein that regulates protein phosphatase 1 Glc7p	12	V	0.000417498	33	0.000273104	69	0.00035528	21	0.00091985	12
YBL059W	S000000155	YBL059W	Putative protein of unknown function	0	V	0	1	5.4932e-06	5	0	1
YEL1	S000000156	YBL060W	Guanine nucleotide exchange factor specific for Arf3p	1	V	1.44629e-06	4	2.43883e-06	7	6.23054e-06	4	0	1
SKT5	S000000157	YBL061C	Activator of Chs3p (chitin synthase III)	13	V	9.70392e-05	24	0.000154546	73	0.000536303	22	2.37952e-05	5
KIP1	S000000159	YBL063W	Kinesin-related motor protein required for mitotic spindle assembly	32	V	6.37021e-06	5	2.69283e-05	50	5.91022e-05	32	3.09988e-06	5
PRX1	S000000160	YBL064C	Mitochondrial peroxiredoxin with thioredoxin peroxidase activity	5	V	0.000141019	21	0.000613316	232	0.00156038	103	0.00103696	25
SEF1	S000000162	YBL066C	Putative transcription factor	3	V	1.80984e-05	9	3.89351e-05	11	8.79104e-06	5
UBP13	S000000163	YBL067C	Putative ubiquitin carboxyl-terminal hydrolase	1	V	2.3147e-05	10	8.22629e-06	12	9.63487e-06	4	0	1
PRS4	S000000164	YBL068W	5-phospho-ribosyl-1(alpha)-pyrophosphate synthetase	6	V	2.30555e-05	7	0.000421678	281	0.000893205	114	0.00162439	26
AST1	S000000165	YBL069W	Peripheral membrane protein that targets plasma membrane ATPase Pma1p	2	V	1.09432e-06	3	1.16847e-05	23	0.000100596	20	0	1
RPS8A	S000000168	YBL072C	Protein component of the small (40S) ribosomal subunit	1	V	0.000544799	133	0.000397864	313	0.000623572	205	0.00084748	160
AAR2	S000000170	YBL074C	Component of the U5 snRNP complex	5	E	3.76432e-06	18	7.22437e-05	80	7.75627e-06	15	9.17681e-09	10
SSA3	S000000171	YBL075C	ATPase involved in protein folding and the response to stress	63	V	0.000608284	52	0.000391436	108	0.00136057	52	0.000285289	11
ILS1	S000000172	YBL076C	Cytoplasmic isoleucine-tRNA synthetase	9	E	9.75765e-05	25	0.000168251	169	0.000241798	42	0.000676995	7
ATG8	S000000174	YBL078C	Component of autophagosomes and Cvt vesicles	80	V	0.000370383	23	0.00062252	197	0.00146764	80	0.00117307	15
NUP170	S000000175	YBL079W	Subunit of the nuclear pore complex (NPC)	16	V	0.000131233	33	0.000384721	136	0.000358777	69	0.000425648	36
PET112	S000000176	YBL080C	Subunit of the trimeric GatFAB AmidoTransferase(AdT) complex	4	V	1.15879e-06	3	0.000117914	57	1.61079e-05	7	1.54291e-05	4
YBL081W	S000000177	YBL081W	Non-essential protein of unknown function	0	V	1.52445e-05	6	2.5642e-06	10	0	1
ALG3	S000000178	YBL082C	Dolichol-P-Man dependent alpha(1-3) mannosyltransferase	14	V	4.23573e-08	2	0.000109809	50	0.000844299	23	0.00151736	11
CDC27	S000000180	YBL084C	Subunit of the Anaphase-Promoting Complex/Cyclosome (APC/C)	33	E	0.000318051	43	0.000208562	81	0.00103531	65	0.000510224	26
BOI1	S000000181	YBL085W	Protein implicated in polar growth	8	V	0.00112869	65	0.00126523	115	0.000308789	32	0.000439371	8
YBL086C	S000000182	YBL086C	Protein of unknown function	0	V	3.84078e-06	4	8.12259e-07	5	8.56126e-07	2
RPL23A	S000000183	YBL087C	Protein component of the large (60S) ribosomal subunit	4	V	0.000133432	48	0.000413022	245	0.00180909	184	0.00197441	125
TEL1	S000000184	YBL088C	Protein kinase primarily involved in telomere length regulation	145	V	3.19836e-05	14	0.00037952	121	0.000644403	60	0.000526538	27
MRP21	S000000186	YBL090W	Mitochondrial ribosomal protein of the small subunit	2	V	5.79787e-05	30	0.000164735	83	7.43152e-05	35	0.00035615	27
MAP2	S000000187	YBL091C	Methionine aminopeptidase	7	V	1.78985e-07	4	1.35129e-06	9	3.17952e-06	2	0	1
RPL32	S000000188	YBL092W	Protein component of the large (60S) ribosomal subunit	12	E	6.3765e-05	60	0.000147701	258	0.000347245	179	0.000998348	131
ROX3	S000000189	YBL093C	Subunit of the RNA polymerase II mediator complex	16	V	9.5888e-05	38	0.000181827	71	0.000352521	43	0.000591078	31
YBL095W	S000000191	YBL095W	Putative protein of unknown function	0	V	6.78147e-06	5	4.90016e-06	5	0	1
BRN1	S000000193	YBL097W	Subunit of the condensin complex	3	E	5.25736e-05	17	1.63701e-05	21	2.85166e-05	14	9.5976e-05	5
BNA4	S000000194	YBL098W	Kynurenine 3-mono oxygenase	3	V			2.37865e-05	32	0.000197252	13	0	1
ATP1	S000000195	YBL099W	Alpha subunit of the F1 sector of mitochondrial F1F0 ATP synthase	13	V	0.000188867	22	0.000699523	150	0.00107201	49	0.00189084	26
ECM21	S000000197	YBL101C	Protein involved in regulating endocytosis of plasma membrane proteins	3	V	2.41869e-05	9	4.1601e-05	30	2.59152e-05	7	1.69733e-06	3
SFT2	S000000198	YBL102W	Tetra-spanning membrane protein found mostly in the late Golgi	2	V	0.000132828	25	0.000211045	44	9.05679e-05	12	0.000437097	5
RTG3	S000000199	YBL103C	Transcription factor for retrograde (RTG) and TOR pathways	29	V	0.000202013	24	0.000454319	102	0.000477349	34	0.000623153	9
SEA4	S000000200	YBL104C	Subunit of the SEA (Seh1-associated) complex	1	V	8.37445e-05	25	5.38033e-05	38	6.00425e-05	14	0	1
PKC1	S000000201	YBL105C	Protein serine/threonine kinase essential for cell wall remodeling	183	E	0.000434233	40	0.00096596	178	0.00511622	113	0.00868443	36
SRO77	S000000202	YBL106C	Protein with roles in exocytosis and cation homeostasis	5	V	5.12782e-05	16	5.1985e-05	24	5.4052e-05	13	5.8525e-06	4
NTH2	S000000205	YBR001C	Putative neutral trehalase	6	V	6.88976e-06	9	9.54922e-05	88	3.86229e-05	13	5.41012e-05	6
RER2	S000000206	YBR002C	Cis-prenyltransferase involved in dolichol synthesis	15	E	2.46981e-05	11	0.000110617	52	6.51596e-05	10	0.000269235	6
COQ1	S000000207	YBR003W	Hexaprenyl pyrophosphate synthetase	20	V	0.000343282	4	0.000100683	28	0.000214051	13	1.53544e-07	5
GPI18	S000000208	YBR004C	Functional ortholog of human PIG-V	3	E	4.93172e-06	4	8.11694e-05	14	0.000385226	8	0	1
RCR1	S000000209	YBR005W	Protein of the ER membrane involved in cell wall chitin deposition	3	V	3.56554e-07	4	7.18462e-05	37	0.000682667	17	0.00107174	7
UGA2	S000000210	YBR006W	Succinate semialdehyde dehydrogenase involved in GABA utilization	8	V	6.4896e-08	6	0.00029289	145	0.000861406	53	0.000260676	4
DSF2	S000000211	YBR007C	Deletion suppressor of mpt5 mutation	1	V	4.22028e-06	2	1.42173e-05	13	0	1
FLR1	S000000212	YBR008C	Plasma membrane multidrug transporter of the major facilitator family	15	V			7.66427e-06	11	0.000295728	4
HHF1	S000000213	YBR009C	Histone H4	7	V	0.00252855	199	0.00120693	228	0.00590755	180	0.00635621	62
HHT1	S000000214	YBR010W	Histone H3	7	V	0.00203979	150	0.000736773	211	0.0032062	162	0.00627261	70
IPP1	S000000215	YBR011C	Cytoplasmic inorganic pyrophosphatase (PPase)	5	E	0.000216603	43	0.000168821	64	0.00138939	44	0.00117295	14
GRX7	S000000218	YBR014C	Cis-golgi localized monothiol glutaredoxin	4	V	0	4	7.91136e-05	8	0	3	0	1
MNN2	S000000219	YBR015C	Alpha-1,2-mannosyltransferase	27	V	7.22396e-06	7	5.19575e-05	44	0.000613494	19	0.00125752	7
YBR016W	S000000220	YBR016W	Tail-anchored plasma membrane protein containing a CYSTM module	0	V	7.41465e-06	7	0.000199211	13	0	1
KAP104	S000000221	YBR017C	Transportin or cytosolic karyopherin beta 2	17	V	0.000757124	74	0.000244538	71	0.0015237	54	0.000827112	17
GAL7	S000000222	YBR018C	Galactose-1-phosphate uridyl transferase	110	V	1.23993e-05	11	0.000119583	33	1.38092e-05	13	8.19545e-05	9
GAL10	S000000223	YBR019C	UDP-glucose-4-epimerase	255	V	3.17302e-05	12	0.000634133	80	0.00032503	28	0.000730891	12
GAL1	S000000224	YBR020W	Galactokinase	701	V	7.93828e-06	9	4.50363e-05	46	0.00014677	17	0.000146312	7
FUR4	S000000225	YBR021W	Uracil permease	53	V	1.76203e-06	4	0.000167091	77	0.000106242	15	0	2
POA1	S000000226	YBR022W	Phosphatase that is highly specific for ADP-ribose 1''-phosphate	1	V	0	1	1.15584e-05	11	1.93874e-07	2
CHS3	S000000227	YBR023C	Chitin synthase III	61	V	0.000158782	28	0.000216634	80	0.00121138	42	0.00111754	14
SCO2	S000000228	YBR024W	Protein anchored to the mitochondrial inner membrane	5	V	1.36826e-05	9	0.000116598	25	0.000409919	8	4.30484e-05	2
OLA1	S000000229	YBR025C	P-loop ATPase with similarity to human OLA1 and bacterial YchF	0	V	0.000148109	33	0.000567413	199	0.000212662	32	0.000726073	5
ETR1	S000000230	YBR026C	2-enoyl thioester reductase	17	V	1.88003e-06	4	8.85677e-05	66	0.000315588	26	0	1
YPK3	S000000232	YBR028C	AGC kinase	0	V	0.000136372	14	1.2456e-05	9	3.34538e-06	3
CDS1	S000000233	YBR029C	Phosphatidate cytidylyltransferase (CDP-diglyceride synthetase)	19	E	3.41342e-06	5	2.92327e-05	24	1.28479e-05	7	9.25007e-05	4
RKM3	S000000234	YBR030W	Ribosomal lysine methyltransferase specific forRpl42ap and Rpl42bp	2	V	5.0847e-07	4	8.23396e-05	57	1.65634e-05	4	1.88013e-07	2
RPL4A	S000000235	YBR031W	N-terminally acetylated protein component of the 60S ribosomal subunit	2	V	0.000418892	144	0.000202644	251	0.000374472	164	0.000200892	117
HMT1	S000000238	YBR034C	SAM-dependent arginine dimethylating methyltransferase	22	V	0.000397092	25	0.000888936	374	0.00153889	227	0.00202538	98
PDX3	S000000239	YBR035C	Pyridoxine (pyridoxamine) phosphate oxidase	2	V	2.67348e-05	9	0.000401294	51	7.08602e-05	12	1.51977e-07	7
CSG2	S000000240	YBR036C	Endoplasmic reticulum membrane protein	15	V	0.000388234	45	0.000275044	73	0.000567939	29	0.00302824	15
SCO1	S000000241	YBR037C	Copper-binding protein of the mitochondrial inner membrane	27	V	2.35246e-05	7	6.74009e-05	25	8.50364e-05	10	7.95168e-05	4
CHS2	S000000242	YBR038W	Chitin synthase II	35	E	4.42812e-06	6	0.00036207	26	2.5147e-05	4	0	1
ATP3	S000000243	YBR039W	Gamma subunit of the F1 sector of mitochondrial F1F0 ATP synthase	9	V	0.000270013	37	0.000373967	118	0.000797295	50	0.000890779	27
FIG1	S000000244	YBR040W	Integral membrane protein required for efficient mating	5	V	0	2	1.56092e-05	17	0.000364658	4	0	1
FAT1	S000000245	YBR041W	Very long chain fatty acyl-CoA synthetase and fatty acid transporter	13	V	5.57465e-05	28	0.000113692	45	0.00109155	30	0.000724002	6
CST26	S000000246	YBR042C	Protein involved in incorporating stearic acid into pdtIns	1	V	2.43274e-05	10	2.04894e-05	9	0	1
QDR3	S000000247	YBR043C	Multidrug transporter of the major facilitator superfamily	2	V	1.21796e-05	5	3.3198e-05	15	0	1	0	1
TCM62	S000000248	YBR044C	Protein involved in assembly of the succinate dehydrogenase complex	3	V	2.49548e-05	13	6.88135e-05	19	9.73673e-05	8	2.56533e-05	2
GIP1	S000000249	YBR045C	Meiosis-specific regulatory subunit of the Glc7p protein phosphatase	4	V	3.24544e-05	6	4.98689e-05	35	0.000112482	10	0.000419362	3
ZTA1	S000000250	YBR046C	NADPH-dependent quinone reductase	4	V	1.46928e-05	3	7.48038e-05	47	3.29554e-05	9	0	1
FMP23	S000000251	YBR047W	Putative protein of unknown function	1	V	0	2	0.000307091	65	0.000124914	18	0.00043569	7
RPS11B	S000000252	YBR048W	Protein component of the small (40S) ribosomal subunit	0	V	9.46805e-05	91	0.000151039	266	0.000463344	184	0.00154769	144
REB1	S000000253	YBR049C	RNA polymerase I enhancer binding protein	66	E	7.99288e-05	37	4.64854e-05	49	0.000169437	26	8.56975e-05	6
REG2	S000000254	YBR050C	Regulatory subunit of the Glc7p type-1 protein phosphatase	3	V	6.62871e-08	4	5.77088e-05	47	9.94182e-05	11	2.54675e-06	3
RFS1	S000000256	YBR052C	Protein of unknown function	2	V	0.000165935	30	0.000236301	108	5.95595e-05	19	0.000196648	3
YBR053C	S000000257	YBR053C	Putative protein of unknown function	0	V	9.24848e-06	6	0.000157236	130	1.43279e-05	44	4.147e-05	6
YRO2	S000000258	YBR054W	Protein of unknown function with similarity to archaeal rhodopsins	2	V	0.000111495	20	8.97938e-05	20	9.54083e-06	5	0	1
PRP6	S000000259	YBR055C	Splicing factor	12	E	0.000418204	94	0.000250646	74	0.000183955	64	0.000300742	46
YBR056W	S000000260	YBR056W	Putative cytoplasmic protein of unknown function	0	V	3.6886e-05	13	8.19845e-05	140	5.93953e-05	48	2.22059e-05	5
MUM2	S000000261	YBR057C	Protein essential for meiotic DNA replication and sporulation	2	V	3.96492e-05	17	5.47269e-05	35	3.81664e-05	7	0	2
UBP14	S000000262	YBR058C	Ubiquitin-specific protease	5	V	2.00595e-05	17	3.22431e-05	33	0.000189839	17	0	1
AKL1	S000000263	YBR059C	Ser-Thr protein kinase	2	V	0.00182976	95	3.28707e-05	32	6.59888e-05	12	4.50573e-06	3
ORC2	S000000264	YBR060C	Subunit of the origin recognition complex	59	E	0.000333759	38	0.000314688	105	0.000916451	65	0.00195817	37
TRM7	S000000265	YBR061C	2'-O-ribose methyltransferase	3	V	1.63605e-06	6	0.000269196	298	5.47372e-05	115	3.4382e-05	12
YBR062C	S000000266	YBR062C	Protein of unknown function that interacts with Msb2p	0	V	7.90973e-07	3	0.000110332	23	5.97453e-07	2
ECM2	S000000269	YBR065C	Pre-mRNA splicing factor	2	V	3.31272e-05	29	4.26178e-05	41	0.000116199	25	0.000195244	17
NRG2	S000000270	YBR066C	Transcriptional repressor that mediates glucose repression	12	V	5.16286e-05	5	2.60204e-05	19	0.000367072	5	0	2
TIP1	S000000271	YBR067C	Major cell wall mannoprotein with possible lipase activity	21	V	0	1	3.65981e-05	26	7.96634e-05	11	0	4
BAP2	S000000272	YBR068C	High-affinity leucine permease	31	V	0.00010948	13	0.000101731	34	5.24302e-05	9	1.21942e-05	2
TAT1	S000000273	YBR069C	Amino acid transport protein for valine	19	V	0.000174316	34	0.000136129	72	0.000190598	16	0.000200694	4
ALG14	S000000274	YBR070C	Component of UDP-GlcNAc transferase	5	E	0.000364875	7	4.85669e-05	19	6.66084e-06	4	0	3
YBR071W	S000000275	YBR071W	Protein of unknown function found in the cytoplasm and bud neck	0	V	2.28534e-06	5	6.59671e-06	8	0	1
HSP26	S000000276	YBR072W	Small heat shock protein (sHSP) with chaperone activity	72	V	0.000123666	39	0.000259639	128	0.000656689	40	0.00102715	10
RDH54	S000000277	YBR073W	DNA-dependent ATPase	26	V	3.30243e-05	8	3.68601e-05	39	1.83864e-05	21	3.46027e-06	10
YBR074W	S000000278	YBR074W, YBR075W	Putative metalloprotease	0	V	0	2	8.00502e-07	5	0	1
ECM8	S000000280	YBR076W	Non-essential protein of unknown function	0	V			9.56397e-07	6	0	1
SLM4	S000000281	YBR077C	Component of the EGO complex	1	V	1.50479e-05	9	2.14034e-05	18	0.00016937	14	0.000487036	7
ECM33	S000000282	YBR078W	GPI-anchored protein of unknown function	8	V	1.82057e-06	5	0.000305143	99	0.000521041	21	1.87976e-05	2
RPG1	S000000283	YBR079C	eIF3a subunit of the eukaryotic translation initiation factor 3 (eIF3)	12	E	0.000381278	76	0.00060196	364	0.00114687	153	0.00134856	51
SEC18	S000000284	YBR080C	ATPase required for vesicular transport between ER and Golgi	117	E	8.48807e-05	36	0.000194394	87	0.000762649	38	0.00124555	11
SPT7	S000000285	YBR081C	Subunit of the SAGA transcriptional regulatory complex	37	V	0.00170691	174	0.00028313	104	0.000923064	62	0.00117202	30
UBC4	S000000286	YBR082C	Ubiquitin-conjugating enzyme (E2)	81	V	0.00030693	33	0.000547474	93	0.00128578	48	0.00218318	12
TEC1	S000000287	YBR083W	Transcription factor targeting filamentation genes and Ty1 expression	50	V	6.85148e-05	16	0.000416486	90	0.000384911	33	0.00107748	17
MIS1	S000000288	YBR084W	Mitochondrial C1-tetrahydrofolate synthase	6	V	0.000202068	47	0.000868742	359	0.00241939	145	0.00456345	42
AAC3	S000000289	YBR085W	Mitochondrial inner membrane ADP/ATP translocator	17	V	0.000408754	19	0.000155878	22	0.000619305	7	0.000177732	2
IST2	S000000290	YBR086C	Plasma membrane protein that may be involved in osmotolerance	15	V	5.60693e-05	22	6.16581e-05	34	4.25546e-05	9	0.000170583	3
RFC5	S000000291	YBR087W	Subunit of heteropentameric Replication factor C (RF-C)	21	E	0.000259377	30	0.000107784	87	0.000324114	44	0.000912323	21
POL30	S000000292	YBR088C	Proliferating cell nuclear antigen (PCNA)	51	E	0.000892407	51	0.000676474	164	0.00139686	96	0.00458186	57
TIM12	S000000295	YBR091C	Essential protein of the inner mitochondrial membrane	9	E	9.98858e-05	11	5.79569e-05	20	0.000140603	14	3.13355e-08	8
PHO3	S000000296	YBR092C	Constitutively expressed acid phosphatase similar to Pho5p	34	V			3.09465e-05	20	0.000131068	7	0	2
PHO5	S000000297	YBR093C	Repressible acid phosphatase	238	V	9.48822e-06	7	0.000155963	59	0.000169606	14	0.000969993	8
PBY1	S000000298	YBR094W	Putative tubulin tyrosine ligase associated with P-bodies	1	V	5.09633e-06	8	2.40414e-05	37	6.18464e-05	13	0.000219123	6
RXT2	S000000299	YBR095C	Subunit of the histone deacetylase Rpd3L complex	0	V	7.15759e-05	23	0.000198799	122	0.000676675	61	0.00052459	26
YBR096W	S000000300	YBR096W	Putative protein of unknown function	0	V	0	1	6.6524e-08	3	6.20719e-07	2
VPS15	S000000301	YBR097W	Serine/threonine protein kinase involved in vacuolar protein sorting	21	V	0.000281579	9	5.68318e-05	39	7.96938e-05	13	0.000626287	7
MMS4	S000000302	YBR098W	Subunit of the structure-specific Mms4p-Mus81p endonuclease	39	V	0.000190588	9	0.000366449	74	0.000277154	35	9.67555e-05	13
FES1	S000000305	YBR101C	Hsp70 (Ssa1p) nucleotide exchange factor	7	V	2.94049e-05	11	0.000132961	48	0.000137368	32	0.000236287	12
EXO84	S000000306	YBR102C	Protein with dual roles in spliceosome assembly and exocytosis	5	E	6.74983e-05	22	2.0851e-05	29	0.000246503	24	0.000457993	12
SIF2	S000000307	YBR103W	Subunit of the Set3C histone deacetylase complex	3	V	0.000189704	26	0.000473425	116	0.000617831	60	0.000410539	23
YMC2	S000000308	YBR104W	Mitochondrial protein	1	V	0	1	1.56154e-05	22	0	2
VID24	S000000309	YBR105C	Peripheral membrane protein located at Vid vesicles	4	V	0.000108114	19	4.30632e-05	29	0.000332909	13	0.00200577	8
PHO88	S000000310	YBR106W	Probable membrane protein	1	V	0.00336422	139	0.000324861	156	0.000312743	27	0.00133549	9
IML3	S000000311	YBR107C	Protein with a role in kinetochore function	5	V	8.90875e-05	25	0.000155622	93	0.000765389	73	0.00155157	23
AIM3	S000000312	YBR108W	Protein interacting with Rvs167p	0	V	8.13901e-05	36	0.00147906	126	5.26146e-05	12	0	2
CMD1	S000000313	YBR109C	Calmodulin	35	E	0.00241791	116	0.00327447	178	0.0104327	111	0.00595528	31
ALG1	S000000314	YBR110W	Mannosyltransferase	25	E	5.40659e-05	36	7.25015e-05	32	0.000208344	11	0.00116954	7
YSA1	S000000315	YBR111C	Nudix hydrolase family member with ADP-ribose pyrophosphatase activity	4	V	1.76561e-05	4	1.37865e-05	22	6.73523e-05	12	0.000228054	6
CYC8	S000000316	YBR112C	General transcriptional co-repressor	110	V	0.000687487	41	0.00112606	131	0.00134794	59	0.00268256	20
RAD16	S000000318	YBR114W	Protein that binds damaged DNA during NER	69	V	0.000118485	31	0.000167393	73	0.000634912	47	0.0021857	16
LYS2	S000000319	YBR115C	Alpha aminoadipate reductase	126	V	1.54051e-05	8	0.000111989	57	0.000363662	27	0.000464593	6
TKL2	S000000321	YBR117C	Transketolase	5	V	1.33598e-05	3	0.000338069	140	0.0011326	73	0.00179213	25
TEF2	S000000322	YBR118W	Translational elongation factor EF-1 alpha	20	V	0.000273971	63	0.000247635	164	0.000786657	63	0.00142381	14
MUD1	S000000323	YBR119W	U1 snRNP A protein	2	V	0.000284855	76	0.000104182	62	0.00023849	37	9.54352e-05	23
CBP6	S000000324	YBR120C	Mitochondrial protein required for translation of the COB mRNA	3	V	4.25572e-06	6	5.70066e-05	42	8.06117e-05	10
GRS1	S000000325	YBR121C	Cytoplasmic and mitochondrial glycyl-tRNA synthase	5	V	1.4942e-05	17	0.00030077	346	0.000985781	167	0.00281075	46
MRPL36	S000000326	YBR122C	Mitochondrial ribosomal protein of the large subunit	2	V	0.000132112	33	0.000128083	73	0.000338976	35	0.000297989	25
TFC1	S000000327	YBR123C	Subunit of TFIIIC RNA pol III transcription initiation factor complex	4	E	0.000152317	20	1.16404e-05	63	5.59959e-05	60	0.000382172	26
PTC4	S000000329	YBR125C	Cytoplasmic type 2C protein phosphatase (PP2C)	4	V	8.96831e-06	11	3.09893e-05	28	5.55414e-05	9	0.000425571	3
TPS1	S000000330	YBR126C	Synthase subunit of trehalose-6-phosphate synthase/phosphatase complex	92	V	0.000606941	43	0.00115294	238	0.0084366	129	0.0218272	50
VMA2	S000000331	YBR127C	Subunit B of the V1 peripheral membrane domain of V-ATPase	14	V	0.000421421	46	0.000374658	80	0.00103638	43	0.00059307	17
ATG14	S000000332	YBR128C	Autophagy-specific subunit of phosphatidylinositol 3-kinase complex I	3	V	0.000288965	8	4.678e-05	35	6.89358e-05	11	0	4
SHE3	S000000334	YBR130C	Protein adaptor between Myo4p and the She2p-mRNA complex	16	V	0.000441222	34	0.000113773	44	6.65946e-05	17	5.85703e-05	8
CCZ1	S000000335	YBR131W	Protein involved in vacuolar assembly	13	V	1.76909e-06	6	2.55871e-05	34	0.000150672	22	4.81612e-05	5
AGP2	S000000336	YBR132C	High affinity polyamine permease	8	V	1.12939e-06	5	2.1707e-05	10	0	2
HSL7	S000000337	YBR133C	Protein arginine N-methyltransferase	23	V	8.71347e-05	14	8.91923e-05	50	0.000209177	22	0.00100097	4
CKS1	S000000339	YBR135W	Cyclin-dependent protein kinase regulatory subunit and adaptor	25	E	0.000373338	49	0.000644609	87	0.0011966	47	0.000284059	17
MEC1	S000000340	YBR136W	Genome integrity checkpoint protein and PI kinase superfamily member	355	E	0.000160147	36	0.00114759	215	0.00379665	137	0.00370497	50
YBR137W	S000000341	YBR137W	Protein of unknown function	1	V	7.50554e-06	11	1.44726e-05	29	6.82071e-06	8	0	3
YBR138C	S000000342	YBR138C, HDR1	Cytoplasmic protein of unknown function	1	V	2.25944e-05	7	1.56272e-05	12	2.42207e-05	4
YBR139W	S000000343	YBR139W	Putative carboxypeptidase with a role in phytochelatin synthesis	1	V	3.0317e-05	8	0.000242355	181	0.000482132	76	0.00011615	16
IRA1	S000000344	YBR140C	GTPase-activating protein that negatively regulates RAS	44	E	0.000121896	12	5.20968e-05	33	0.000108659	21	7.83584e-05	8
YBR141C	S000000345	YBR141C	Putative S-adenosylmethionine-dependent methyltransferase	0	V	2.61558e-06	3	0.000116757	142	3.54647e-06	19	0	1
MAK5	S000000346	YBR142W	Essential nucleolar protein	4	E	0.000396553	71	0.000512692	381	0.000979915	261	0.000233459	135
SUP45	S000000347	YBR143C	Polypeptide release factor (eRF1) in translation termination	80	E	0.000335089	41	0.00116523	465	0.00338025	212	0.00365194	49
ADH5	S000000349	YBR145W	Alcohol dehydrogenase isoenzyme V	7	V	1.04017e-05	3	0.000305319	79	0.00102204	45	0.00126222	9
MRPS9	S000000350	YBR146W	Mitochondrial ribosomal protein of the small subunit	2	V	6.28271e-05	34	7.47156e-05	67	3.50205e-05	38	0.00032772	32
RTC2	S000000351	YBR147W	Protein of unknown function	2	V			7.97746e-05	56	3.47619e-05	12	0	2
YSW1	S000000352	YBR148W	Protein required for normal prospore membrane formation	1	V	1.42439e-06	6	5.11808e-07	7	2.13862e-05	5	0	1
ARA1	S000000353	YBR149W	NADP dependent arabinose dehydrogenase	6	V	3.17285e-06	5	0.000143278	128	0.000202088	26	0.000419362	3
TBS1	S000000354	YBR150C	Putative protein of unknown function	0	V	7.50834e-06	8	1.16728e-06	6	0.000364163	2
APD1	S000000355	YBR151W	Protein of unknown function	1	V	9.69115e-06	4	0	2	0	1
SPP381	S000000356	YBR152W	mRNA splicing factor	2	E	1.72487e-05	21	8.36279e-06	33	1.67804e-06	19	3.71812e-06	18
RIB7	S000000357	YBR153W	Diaminohydroxyphoshoribosylaminopyrimidine deaminase	3	E	0	3	2.09848e-05	15	4.52352e-05	6	0	1
RPB5	S000000358	YBR154C	RNA polymerase subunit ABC27	17	E	0.000329752	72	0.00115913	489	0.00254379	294	0.00499869	108
CNS1	S000000359	YBR155W	TPR-containing co-chaperone	9	E	6.58546e-05	29	0.000425065	320	0.00176602	199	0.00160885	49
SLI15	S000000360	YBR156C	Subunit of the conserved chromosomal passenger complex (CPC)	20	V	0.000114644	30	4.50222e-05	37	0.000164859	31	0.000322375	12
ICS2	S000000361	YBR157C	Protein of unknown function	1	V	3.37821e-05	8	4.4636e-06	5	3.3831e-07	4
AMN1	S000000362	YBR158W	Protein required for daughter cell separation	10	V	1.48761e-06	5	0.000242764	71	0.000553875	33	0.00108383	11
IFA38	S000000363	YBR159W	Microsomal beta-keto-reductase	7	V	0.00217887	122	0.000221942	60	0.000504724	27	0.00112091	12
CDC28	S000000364	YBR160W	Catalytic subunit of the main cell cycle cyclin-dependent kinase (CDK)	610	E	0.0126742	325	0.00564613	373	0.0391402	327	0.0234329	112
CSH1	S000000365	YBR161W	Probable catalytic subunit of a MIPC synthase	5	V	1.01997e-06	5	3.31168e-07	5	3.27435e-06	4	0	2
TOS1	S000000366	YBR162C	Covalently-bound cell wall protein of unknown function	2	V	1.38465e-05	9	0.000233688	56	8.43872e-05	16	0.00116556	12
EXO5	S000000367	YBR163W	Mitochondrial 5'-3' exonuclease and sliding exonuclease	1	V			2.45132e-07	5	0	1
ARL1	S000000368	YBR164C	Soluble GTPase with a role in regulation of membrane traffic	20	V	0.000132771	16	0.000513332	128	0.00238596	58	0.00256455	17
UBS1	S000000369	YBR165W	Ubiquitin-conjugating enzyme suppressor that regulates Cdc34p	2	V			2.91467e-06	14	1.24504e-06	2	5.79822e-06	2
TYR1	S000000370	YBR166C	Prephenate dehydrogenase involved in tyrosine biosynthesis	20	V	6.06457e-06	8	3.00233e-05	26	5.42097e-05	10	0	1
POP7	S000000371	YBR167C	Subunit of both RNase MRP and nuclear RNase P	4	E	5.70611e-05	14	7.67805e-05	73	1.35316e-05	15	3.37354e-05	10
PEX32	S000000372	YBR168W	Peroxisomal integral membrane protein	2	V	8.37198e-05	6	1.29255e-05	9	1.80102e-05	4	5.04957e-05	2
SSE2	S000000373	YBR169C	Member of the heat shock protein 70 (HSP70) family	6	V	0.000274969	35	0.00080693	248	0.0035669	128	0.00325323	40
NPL4	S000000374	YBR170C	Ubiquitin-binding protein involved in protein degradation	27	V	0.000169988	26	0.000106287	47	0.000412909	32	0.000595218	15
SEC66	S000000375	YBR171W	Non-essential subunit of Sec63 complex	12	V	0.000129448	23	0.000437971	108	0.000289353	26	0.000288432	9
SMY2	S000000376	YBR172C	Protein of unknown function involved in COPII vesicle formation	8	V	7.90025e-05	21	0.000147987	38	0.000326998	24	0.000140821	4
UMP1	S000000377	YBR173C	Chaperone required for correct maturation of the 20S proteasome	24	V	0.000176775	28	0.000129629	57	0.000454613	40	0.000679017	24
SWD3	S000000379	YBR175W	Essential subunit of the COMPASS (Set1C) complex	6	V	0.000137776	25	0.000239476	124	0.000735986	64	0.0018643	23
ECM31	S000000380	YBR176W	Ketopantoate hydroxymethyltransferase	2	V	1.9928e-06	9	7.71331e-05	43	0.000413835	10	0.0129128	3
EHT1	S000000381	YBR177C	Acyl-coenzymeA:ethanol O-acyltransferase	6	V	0.000137055	30	0.000108787	18	0.000408002	6	0	1
FZO1	S000000383	YBR179C	Mitofusin	28	V	4.39434e-05	9	4.35691e-05	21	0.000188825	14	0.00118105	8
DTR1	S000000384	YBR180W	Putative dityrosine transporter	3	V	8.8457e-06	4	5.1843e-06	10	5.3674e-05	5
RPS6B	S000000385	YBR181C	Protein component of the small (40S) ribosomal subunit	1	V	4.33967e-05	75	0.000271657	222	0.000301906	143	0.000666107	105
SMP1	S000000386	YBR182C	Putative transcription factor involved in osmotic stress response	6	V	7.56296e-06	10	0.000161736	32	8.42763e-06	5	0	1
YPC1	S000000387	YBR183W	Alkaline ceramidase that also has reverse ceramide synthase activity	5	V	0.000244096	35	0.000157868	61	4.4867e-05	10	0	2
MBA1	S000000389	YBR185C	Membrane-associated mitochondrial ribosome receptor	6	V	1.27888e-06	5	5.64612e-05	48	0.000102258	11	0.000533739	5
PCH2	S000000390	YBR186W	Nucleolar component of the pachytene checkpoint	14	V	2.77216e-06	7	2.42331e-05	24	9.87578e-05	14	5.62344e-05	6
GDT1	S000000391	YBR187W	Putative protein of unknown function	0	V	6.92565e-05	12	0.000206166	189	3.5833e-05	37	5.76478e-05	6
NTC20	S000000392	YBR188C	Member of the NineTeen Complex (NTC)	3	V	9.10544e-05	24	8.8724e-05	50	2.11717e-05	23	5.64083e-06	14
RPS9B	S000000393	YBR189W	Protein component of the small (40S) ribosomal subunit	0	V	0.0006058	126	0.00034435	348	0.00101703	221	0.00147275	158
RPL21A	S000000395	YBR191W	Protein component of the large (60S) ribosomal subunit	3	V	2.41321e-05	53	0.0001031	199	6.27693e-05	142	5.76033e-05	118
RIM2	S000000396	YBR192W	Mitochondrial pyrimidine nucleotide transporter	6	E	0	1	2.34077e-05	7	3.03228e-05	5	0	3
MED8	S000000397	YBR193C	Subunit of the RNA polymerase II mediator complex	16	E	0.000370716	41	0.000149084	62	0.000728835	38	4.65555e-06	24
AIM4	S000000398	YBR194W	Protein proposed to be associated with the nuclear pore complex	1	V	0.000907436	159	0.000232501	83	1.14286e-06	2	0	1
MSI1	S000000399	YBR195C	Subunit of chromatin assembly factor I (CAF-1)	13	V	1.43113e-05	12	0.00012567	55	0.000423426	29	0.000293318	11
PGI1	S000000400	YBR196C	Glycolytic enzyme phosphoglucose isomerase	29	E	0.000104742	23	0.000519668	122	0.000767127	56	0.00201258	27
YBR197C	S000000401	YBR197C	Putative protein of unknown function	1	V	3.19873e-07	2	5.8356e-06	15	1.29796e-06	2
TAF5	S000000402	YBR198C	Subunit (90 kDa) of TFIID and SAGA complexes	6	E	0.000937176	167	0.000254776	113	0.000275027	75	0.000440509	44
KTR4	S000000403	YBR199W	Putative mannosyltransferase involved in protein glycosylation	5	V	7.62772e-05	6	2.71317e-05	21	8.80526e-06	5	5.28236e-05	2
BEM1	S000000404	YBR200W	Protein containing SH3-domains	63	V	0.00140265	83	0.00113201	171	0.00146422	77	0.000956618	24
DER1	S000000405	YBR201W	Endoplasmic reticulum membrane protein	17	V	5.21794e-07	12	7.33248e-05	46	2.57959e-05	16	0.000266474	12
MCM7	S000000406	YBR202W	Component of the heterohexameric MCM2-7 complex	21	E	0.000217489	30	0.000114271	75	0.000330546	53	0.00111086	31
KTR3	S000000409	YBR205W	Putative alpha-1,2-mannosyltransferase	7	V	0.000120296	23	0.000198796	45	0.000241275	10	0	1
FTH1	S000000411	YBR207W	Putative high affinity iron transporter	3	V	0.000261279	40	8.84305e-05	35	0.000107172	9	0	1
DUR1,2	S000000412	YBR208C	Urea amidolyase	14	V	4.49215e-06	9	6.11417e-05	30	0.000967552	19	0.000247591	6
ERV15	S000000414	YBR210W	Protein involved in export of proteins from the endoplasmic reticulum	2	V	6.57868e-07	4	7.83322e-05	23	4.52037e-07	2
AME1	S000000415	YBR211C	Essential kinetochore protein associated with microtubules and SPBs	4	E	9.07454e-05	24	0.000203462	78	0.000139138	60	0.000227754	21
NGR1	S000000416	YBR212W	RNA binding protein that negatively regulates growth rate	8	V	3.02278e-05	16	4.56572e-05	41	0.000136982	8	0	1
MET8	S000000417	YBR213W	Bifunctional dehydrogenase and ferrochelatase	14	V	0	3	7.36685e-06	16	3.90959e-05	5	0	1
SDS24	S000000418	YBR214W	Homolog of S. pombe Sds23 protein	2	V	4.28714e-05	7	0.000154162	116	0.000305663	38	0.000251017	5
HPC2	S000000419	YBR215W	Subunit of the HIR complex	6	V	3.55446e-05	14	4.90149e-05	49	2.07691e-05	16	0	5
YBP1	S000000420	YBR216C	Protein required for oxidation of specific cysteine residues of Yap1p	9	V	1.4661e-06	5	3.90316e-05	31	1.26447e-05	6	0	2
ATG12	S000000421	YBR217W	Ubiquitin-like modifier involved in autophagy and the Cvt pathway	18	V	0.00064996	52	0.000114064	34	5.35061e-05	12	0.000958837	7
PYC2	S000000422	YBR218C	Pyruvate carboxylase isoform	13	V	6.6351e-06	9	7.63798e-05	64	0.000439786	48	0.000521234	17
PDB1	S000000425	YBR221C	E1 beta subunit of the pyruvate dehydrogenase (PDH) complex	0	V	0.000210118	30	0.000341109	91	0.00133746	47	0.00279278	21
PCS60	S000000426	YBR222C	Peroxisomal protein that binds AMP and mRNA	2	V	5.72295e-05	10	0.000112664	39	2.92591e-05	5	0	1
TDP1	S000000427	YBR223C	Tyrosyl-DNA Phosphodiesterase I	16	V	3.68524e-06	7	4.97245e-05	32	0.000301522	27	3.35804e-05	8
YBR225W	S000000429	YBR225W	Putative protein of unknown function	0	V	3.50852e-05	15	8.89994e-06	13	3.62262e-06	5	0	2
MCX1	S000000431	YBR227C	Mitochondrial matrix protein	3	V	2.12942e-07	4	0.000146358	55	0.00088406	12	0	1
SLX1	S000000432	YBR228W	Endonuclease involved in DNA recombination and repair	15	V	8.73964e-06	5	4.74533e-05	31	8.69288e-06	10	7.63243e-07	6
ROT2	S000000433	YBR229C	Glucosidase II catalytic subunit involved in cell wall synthesis	3	V	5.13944e-05	9	0.00029855	83	0.000508587	29	0.000780879	12
OM14	S000000434	YBR230C	Integral mitochondrial outer membrane protein	1	V	9.57622e-05	11	0.00071295	197	0.000310037	56	0.000696379	11
SWC5	S000000435	YBR231C	Protein of unknown function	3	V	3.44207e-05	19	0.000178828	126	8.99565e-05	53	8.71907e-05	21
PBP2	S000000437	YBR233W	RNA binding protein with similarity to mammalian hnRNP K	2	V	4.49122e-05	19	0.000362472	28	0.000419535	15	0	2
ARC40	S000000438	YBR234C	Subunit of the ARP2/3 complex	4	E	0.000233319	43	0.00010597	69	3.8384e-05	17	9.61323e-06	10
YBR235W	S000000439	YBR235W	Putative ion transporter	1	V	4.01676e-06	5	1.29654e-06	6	1.71974e-06	2
ABD1	S000000440	YBR236C	Methyltransferase	13	E	4.39149e-06	6	5.25761e-05	44	4.49339e-05	28	9.15164e-05	7
PRP5	S000000441	YBR237W	RNA helicase in the DEAD-box family	10	E	1.68446e-05	9	9.63206e-05	34	2.09539e-05	9	0.000107394	5
YBR238C	S000000442	YBR238C	Mitochondrial membrane protein with similarity to Rmd9p	0	V	2.05746e-06	5	0.00020683	118	3.37259e-06	5	0	1
ERT1	S000000443	YBR239C	Transcriptional regulator of nonfermentable carbon utilization	1	V	2.09182e-05	7	8.14617e-05	9	1.52142e-07	3
THI2	S000000444	YBR240C	Transcriptional activator of thiamine biosynthetic genes	9	V	0	1	2.63983e-06	8	2.40302e-06	3	0	1
YBR241C	S000000445	YBR241C	Putative transporter	0	V	2.59526e-06	11	3.45461e-05	82	0.000212904	18	6.13259e-06	4
ALG7	S000000447	YBR243C	UDP-N-acetyl-glucosamine-1-P transferase	18	E	5.76438e-06	10	4.54752e-05	36	0.000314982	16	0.000284611	7
GPX2	S000000448	YBR244W	Phospholipid hydroperoxide glutathione peroxidase	10	V	9.16917e-06	10	3.11688e-05	27	5.84981e-06	8	1.96242e-07	3
ISW1	S000000449	YBR245C	Member of the ISWI class of chromatin remodeling complexes	31	V	0.000271159	51	0.000328577	124	0.00104678	73	0.00283266	44
ENP1	S000000451	YBR247C	Protein associated with U3 and U14 snoRNAs	5	E	0.000201393	98	0.000299347	425	0.00140631	268	0.00173643	152
HIS7	S000000452	YBR248C	Imidazole glycerol phosphate synthase	26	V	2.71565e-05	4	0.00018504	93	0.00037811	32	0.000333074	10
ARO4	S000000453	YBR249C	3-deoxy-D-arabino-heptulosonate-7-phosphate (DAHP) synthase	21	V	2.01583e-05	12	0.000419698	80	0.00047236	28	7.38052e-05	5
SPO23	S000000454	YBR250W	Protein of unknown function	1	V	1.76171e-07	2	2.15162e-05	8	0	1	0	1
MRPS5	S000000455	YBR251W	Mitochondrial ribosomal protein of the small subunit	0	V	0.000529625	53	0.000392208	107	0.00193527	70	0.00209335	37
DUT1	S000000456	YBR252W	deoxyuridine triphosphate diphosphatase (dUTPase)	8	E	3.33881e-05	12	0.000874287	244	0.000333645	45	0.000336315	9
SRB6	S000000457	YBR253W	Subunit of the RNA polymerase II mediator complex	6	E	9.11837e-05	46	4.46701e-05	68	4.78843e-05	40	0.000132626	29
TRS20	S000000458	YBR254C	Subunit of the transport protein particle (TRAPP) complex	3	E	5.00388e-06	16	0.000102097	64	0.000109744	17	7.20444e-05	11
MTC4	S000000459	YBR255W	Protein of unknown function	1	V	0	1	0.000101373	43	1.80211e-05	5
RIB5	S000000460	YBR256C	Riboflavin synthase	5	E	0	4	0.00067204	130	0.00135039	54	0.00245029	23
POP4	S000000461	YBR257W	Subunit of both RNase MRP and nuclear RNase P	5	E	1.38002e-07	12	1.33066e-05	24	1.8486e-05	15	3.37354e-05	10
SHG1	S000000462	YBR258C	Subunit of the COMPASS (Set1C) complex	3	V	8.24799e-07	8	7.23023e-06	18	3.86132e-05	11	0	7
YBR259W	S000000463	YBR259W	Putative protein of unknown function	1	V	1.07585e-07	2	8.07952e-06	9	2.57306e-08	2
RGD1	S000000464	YBR260C	GTPase-activating protein (RhoGAP) for Rho3p and Rho4p	12	V	5.74735e-05	16	9.96491e-05	48	6.94422e-05	18	0.000556147	11
TAE1	S000000465	YBR261C	AdoMet-dependent proline methyltransferase	2	V	0.00060814	44	0.000470624	76	0.00056941	25
SHM1	S000000467	YBR263W	Mitochondrial serine hydroxymethyltransferase	11	V	1.93003e-06	6	0.000166981	76	0.000426736	36	0.000873477	20
YPT10	S000000468	YBR264C	Rab family GTP-binding protein that contains the PEST signal sequence	2	V	1.99377e-05	13	1.96058e-05	12	2.75023e-05	7	0	1
TSC10	S000000469	YBR265W	3-ketosphinganine reductase	3	E	9.91642e-07	4	0.000329673	17	7.01304e-05	13	0.00154101	5
REI1	S000000471	YBR267W	Cytoplasmic pre-60S factor	8	V	1.89979e-05	20	0.000313901	338	0.00208127	208	0.00106198	92
MRPL37	S000000472	YBR268W	Mitochondrial ribosomal protein of the large subunit	2	V	1.96581e-08	4	2.85937e-05	26	9.34039e-07	5
FMP21	S000000473	YBR269C	Putative protein of unknown function	0	V	0	2	0.000144381	111	1.18069e-05	15
BIT2	S000000474	YBR270C	Subunit of TORC2	1	V	2.52417e-05	15	2.0885e-05	22	5.95546e-06	5	4.56595e-05	2
YBR271W	S000000475	YBR271W	S-adenosylmethionine-dependent methyltransferase	0	V	0	1	2.58898e-05	291	1.69202e-05	171	1.1284e-06	37
HSM3	S000000476	YBR272C	Assembly chaperone for the 19S proteasome regulatory particle base	21	V	1.9838e-05	30	6.2757e-05	64	0.000289635	57	0.000675332	35
UBX7	S000000477	YBR273C	UBX domain-containing protein that interacts with Cdc48p	1	V	3.83864e-05	15	1.41907e-05	16	1.66975e-06	4	7.06213e-06	3
CHK1	S000000478	YBR274W	Serine/threonine kinase and DNA damage checkpoint effector	71	V	0.000427708	48	0.000167446	74	0.000490737	46	0.000785423	17
RIF1	S000000479	YBR275C	Protein that binds to the Rap1p C-terminus	45	V	0.000119131	13	4.12004e-05	35	0.000129415	21	8.12786e-06	3
PPS1	S000000480	YBR276C	Protein phosphatase with specificity for serine	3	V	3.42293e-08	3	9.68541e-06	18	0.000105161	8	0	4
DPB3	S000000482	YBR278W	Third-largest subunit of DNA polymerase II (DNA polymerase epsilon)	11	V	5.81883e-05	11	8.43389e-05	45	0.000136379	21	2.09815e-06	5
PAF1	S000000483	YBR279W	Component of the Paf1p complex involved in transcription elongation	63	V	0.000253519	41	0.000281723	108	0.00101224	66	0.000581513	29
SAF1	S000000484	YBR280C	F-Box protein involved in proteasome-dependent degradation of Aah1p	4	V	1.78089e-06	7	0.000165095	94	7.73269e-05	13	0.000355988	4
DUG2	S000000485	YBR281C	Probable di- and tri-peptidase	2	V	1.29903e-05	8	2.84768e-06	7	1.61066e-05	4	0	1
MRPL27	S000000486	YBR282W	Mitochondrial ribosomal protein of the large subunit	3	V	2.58072e-05	20	4.8353e-05	60	3.31141e-05	18	0	11
SSH1	S000000487	YBR283C	Subunit of the Ssh1 translocon complex	7	V	0.000211582	42	0.000857989	152	0.000959078	35	0.00181515	13
YBR284W	S000000488	YBR284W	Putative protein of unknown function	0	V	1.84573e-06	4	4.87845e-06	10	9.46955e-06	3	0	1
YBR285W	S000000489	YBR285W	Putative protein of unknown function	0	V	5.88052e-06	7	3.24918e-05	60	1.29668e-05	5
APE3	S000000490	YBR286W	Vacuolar aminopeptidase Y	1	V	2.16912e-06	5	0.000128434	46	1.08083e-05	8	0	1
YBR287W	S000000491	ZSP1, YBR287W	Protein of unknown function	1	V	2.00156e-06	4	3.13399e-06	10	1.90171e-05	3
APM3	S000000492	YBR288C	Mu3-like subunit of the clathrin associated protein complex (AP-3)	0	V	3.10851e-06	8	5.88182e-05	59	4.34984e-05	16	0.000348548	6
SNF5	S000000493	YBR289W	Subunit of the SWI/SNF chromatin remodeling complex	69	V	0.000140395	38	0.000324637	77	0.000403514	39	0.000252675	18
BSD2	S000000494	YBR290W	Heavy metal ion homeostasis protein	16	V	0.000635827	42	0.00022772	77	0.000605308	29	0.0013031	10
CTP1	S000000495	YBR291C	Mitochondrial inner membrane citrate transporter	4	V	1.08774e-06	4	3.04853e-05	25	1.57422e-05	7
VBA2	S000000497	YBR293W	Permease of basic amino acids in the vacuolar membrane	1	V	1.05672e-05	7	1.96396e-05	6	0	2
SUL1	S000000498	YBR294W	High affinity sulfate permease of the SulP anion transporter family	5	V			3.33746e-05	20	8.18917e-06	4	0	2
PCA1	S000000499	YBR295W	Cadmium transporting P-type ATPase	10	V	4.76449e-06	4	3.59934e-05	26	0.000181461	13	0.000289201	3
PHO89	S000000500	YBR296C	Naﳸ� cotransporter	12	V	9.56823e-07	4	0.000669661	23	3.11256e-05	9	4.73042e-05	4
MAL31	S000000502	YBR298C	Maltose permease	10	V	0.000119202	19	0.000156298	37	4.66586e-06	4
MAL32	S000000503	YBR299W	Maltase (alpha-D-glucosidase)	2	V	3.57855e-05	8	8.11761e-05	16	4.07253e-05	11	0	2
PAU24	S000000505	YBR301W	Cell wall mannoprotein with similarity to Tir1p	0	V			1.41462e-05	31	4.29962e-06	21	2.11765e-05	18
COS2	S000000506	YBR302C	Protein of unknown function	0	V	0	1	7.20131e-06	8	0.000155706	6	0	3
RER1	S000000507	YCL001W	Protein involved in retention of membrane proteins	16	V	8.73582e-05	10	0.000137909	69	0.000196099	20	0.000467688	4
PGS1	S000000510	YCL004W	Phosphatidylglycerolphosphate synthase	20	E	1.67395e-05	2	7.02136e-05	35	0.000684529	29	8.49175e-05	4
LDB16	S000000511	YCL005W	Protein of unknown function	3	V	0	1	1.01143e-05	9	0	1
STP22	S000000514	YCL008C	Component of the ESCRT-I complex	17	V	7.15062e-05	21	0.000184855	75	0.000212233	24	0.000802527	10
ILV6	S000000515	YCL009C	Regulatory subunit of acetolactate synthase	2	V	4.54556e-05	16	0.000191505	79	0.000199632	30	0.000479781	9
SGF29	S000000516	YCL010C	Component of the HAT/Core module of the SAGA, SLIK, and ADA complexes	4	V	0.000649064	87	0.000255559	37	2.17115e-06	20	4.41709e-07	19
GBP2	S000000517	YCL011C	Poly(A) RNA-binding protein	8	V	0.000137963	51	8.79102e-05	82	0.000115443	40	0.000801401	33
BUD3	S000000520	YCL014W	Protein involved in bud-site selection and axial budding patterning	22	V	0.000177905	40	0.000196178	61	0.000899673	31	0.00226747	11
DCC1	S000000521	YCL016C	Subunit of a Ctf18 RFC-like complex	11	V	7.33512e-07	5	0.000485619	110	0.000761097	50	0.000328966	16
NFS1	S000000522	YCL017C	Cysteine desulfurase	30	E	3.30488e-05	12	0.000268932	84	0.000306331	20	0.00180237	11
LEU2	S000000523	YCL018W	Beta-isopropylmalate dehydrogenase (IMDH)	401	V	6.57765e-06	6	5.02169e-05	35	0.000135216	19	0.000947911	10
YCL019W	S000000524	YCL019W	Retrotransposon TYA Gag and TYB Pol genes	0	V	1.89791e-05	6	0.000236337	26	0.00206541	18	0.00024876	12
YCL020W	S000000525	YCL020W	Retrotransposon TYA Gag gene co-transcribed with TYB Pol	0	V	1.7542e-05	5	0.000397599	12	0.000364163	2	1.88013e-07	2
KCC4	S000000529	YCL024W	Protein kinase of the bud neck involved in the septin checkpoint	11	V	0.00021952	54	2.81907e-05	34	5.37314e-05	18	3.5581e-05	10
AGP1	S000000530	YCL025C	Low-affinity amino acid permease with broad substrate range	21	V	0.000117943	38	0.000184169	53	0.000238799	15	0.0004653	3
FUS1	S000000532	YCL027W	Membrane protein localized to the shmoo tip	112	V	0.000160696	33	0.00217554	103	0.00155262	44	0.000912074	16
RNQ1	S000000533	YCL028W	[PIN()] prion	49	V	0.0004276	67	0.000177599	88	0.0002645	44	0.000272426	11
BIK1	S000000534	YCL029C	Microtubule-associated protein	26	V	4.93292e-05	23	0.000304874	131	0.00128213	96	0.000134558	25
HIS4	S000000535	YCL030C	Multifunctional enzyme containing phosphoribosyl-ATP pyrophosphatase	259	V	5.32236e-06	14	0.000618296	158	0.00195929	73	0.00332026	22
RRP7	S000000536	YCL031C	Essential protein involved in rRNA processing and ribosome biogenesis	2	E	0.000101949	25	0.000275976	138	2.61988e-05	69	0.000107447	20
STE50	S000000537	YCL032W	Protein involved in mating response	34	V	8.75666e-05	29	0.000808864	80	0.00056986	42	0.000863139	13
MXR2	S000000538	YCL033C	Methionine-R-sulfoxide reductase	1	V	1.40741e-06	4	0.000264721	55	2.46331e-05	5	0.000419362	2
LSB5	S000000539	YCL034W	Protein of unknown function	4	V	1.78347e-05	8	1.59856e-05	19	1.004e-05	6	0	3
GRX1	S000000540	YCL035C	Glutathione-dependent disulfideoxidoreductase	21	V	2.27367e-05	11	0.000348251	193	0.00128212	85	0.000783811	14
GFD2	S000000541	YCL036W	Protein of unknown function	0	V	3.58436e-06	4	8.65413e-06	55	4.23562e-05	10
SRO9	S000000542	YCL037C	RNA-binding protein that associates with translating ribosomes	5	V	0.000207301	59	0.000216506	149	0.000640668	55	0.00115106	29
ATG22	S000000543	YCL038C	Protein involved in amino acid efflux during autophagic body breakdown	2	V	7.5417e-08	3	3.08837e-06	8	0.000364163	2	0	1
GID7	S000000544	YCL039W	Protein of unknown function	1	V	5.86927e-05	15	1.97752e-05	13	1.60403e-05	8	0	6
GLK1	S000000545	YCL040W	Glucokinase	19	V	9.09944e-05	17	0.000895438	225	0.00304905	119	0.00207309	36
YCL042W	S000000547	YCL042W	Putative protein of unknown function	0	V	3.9385e-06	2	1.72248e-05	31	0	2
PDI1	S000000548	YCL043C	Protein disulfide isomerase	34	E	0.000188966	29	0.00109946	150	0.000333731	23	0.0012518	8
MGR1	S000000549	YCL044C	Subunit of the mitochondrial (mt) i-AAA protease supercomplex	3	V	8.98952e-05	9	7.11373e-05	24	0.000167737	10	1.44665e-05	4
EMC1	S000000550	YCL045C	Member of a transmembrane complex involved in ER protein folding	1	V	0.000162344	6	4.1639e-05	29	0.000228691	8	0.000873038	3
POF1	S000000552	YCL047C	Protein involved in the filamentation pathway	2	V	7.31464e-07	4	0	1	0	1
SPS22	S000000553	YCL048W	Protein of unknown function	0	V	5.45968e-06	4	8.99867e-07	4	3.48229e-06	3	0	2
APA1	S000000555	YCL050C	Diadenosine 5',5''-P1,P4-tetraphosphate phosphorylase I	7	V	7.37184e-06	8	5.07186e-05	41	0.000250722	11	0.000419362	2
LRE1	S000000556	YCL051W	Protein involved in control of cell wall structure and stress response	6	V	1.27722e-07	4	1.6452e-05	30	8.01035e-05	13	8.84326e-06	2
PBN1	S000000557	YCL052C	Component of glycosylphosphatidylinositol-mannosyltransferase I	5	E	7.37862e-05	14	3.73314e-05	21	6.85662e-05	10	0.000188642	2
SPB1	S000000559	YCL054W	AdoMet-dependent methyltransferase	10	E	1.58625e-05	32	0.000220054	367	0.000358534	242	0.000286535	146
KAR4	S000000560	YCL055W	Transcription factor required for response to pheromones	5	V	6.57241e-05	6	0.00011641	35	8.58908e-05	13	0.00054611	5
PEX34	S000000561	YCL056C	Peroxisomal integral membrane protein that regulates peroxisomes	1	V	0.000202186	17	3.10736e-05	13	0.000367534	3	0	1
PRD1	S000000562	YCL057W	Zinc metalloendopeptidase	7	V	1.39019e-06	4	1.2424e-05	17	6.12528e-06	4
KRR1	S000000564	YCL059C	Nucleolar protein required for rRNA synthesis and ribosomal assembly	6	E	0.000194146	85	0.000578223	488	0.000701531	309	0.000937918	187
MRC1	S000000566	YCL061C	S-phase checkpoint protein required for DNA replication	61	V	6.3573e-05	22	0.000198038	133	0.000541139	87	0.00084045	37
VAC17	S000000568	YCL063W	Phosphoprotein involved in vacuole inheritance	8	V	5.0864e-06	6	7.48344e-05	36	0.000466167	13	0.000521506	5
CHA1	S000000569	YCL064C	Catabolic L-serine (L-threonine) deaminase	21	V	2.96325e-07	5	3.91843e-05	37	0.00023038	23	0.000433536	5
HMLALPHA1	S000000571	YCL066W	Silenced copy of ALPHA1 at HML	2	V	4.79728e-06	6	0.000209107	36	0.000673842	25	0.00136775	16
HMLALPHA2	S000000572	YCL067C	Silenced copy of ALPHA2 at HML	2	V	3.12775e-06	5	4.96876e-05	28	9.46615e-05	15	0.000228516	5
VBA3	S000000574	YCL069W	Permease of basic amino acids in the vacuolar membrane	1	V	2.01129e-07	2	2.39187e-05	17	0.000728192	4
GEX1	S000000575	YCL073C	Protein of unconfirmed function	1	V	4.63496e-07	2	5.54008e-07	5	4.10722e-06	4
FRM2	S000000589	YCL026C-A	Protein of unknown function	3	V	0	1	3.29062e-07	4	0	1
CDC10	S000000595	YCR002C	Component of the septin ring that is required for cytokinesis	69	V	9.6487e-05	33	7.78415e-05	47	0.000165084	29	0.000165487	14
MRPL32	S000000596	YCR003W	Mitochondrial ribosomal protein of the large subunit	2	V	1.68614e-05	4	6.79214e-05	55	3.31425e-05	15	0	2
YCP4	S000000597	YCR004C	Protein of unknown function	5	V	2.13404e-05	13	2.61813e-05	44	2.71176e-05	10	0	2
CIT2	S000000598	YCR005C	Citrate synthase	39	V	4.70505e-06	9	0.000160267	78	0.000935367	47	0.00250065	19
YCR007C	S000000600	YCR007C	Putative integral membrane protein	2	V	7.87871e-05	11	1.52931e-05	9	0	1
SAT4	S000000601	YCR008W	Ser/Thr protein kinase involved in salt tolerance	5	V	0.000497039	56	4.78288e-05	39	4.37018e-05	9	0	1
RVS161	S000000602	YCR009C	Amphiphysin-like lipid raft protein	28	V	0.000545875	58	0.000570087	147	0.00363174	101	0.00921601	21
ADY2	S000000603	YCR010C	Acetate transporter required for normal sporulation	4	V	0.000346969	6	1.8978e-05	22	0.000364592	3	0	1
PGK1	S000000605	YCR012W	3-phosphoglycerate kinase	95	E	0.000257824	54	0.000896881	158	0.00100514	49	0.0014999	15
POL4	S000000607	YCR014C	DNA polymerase IV	20	V	1.30288e-05	17	0.000336558	27	8.99879e-05	21	0.000276071	12
YCR015C	S000000608	YCR015C	Putative protein of unknown function	0	V	0	1	0	1	0	1	0	1
YCR016W	S000000609	YCR016W	Putative protein of unknown function	0	V	6.42899e-05	23	0.000346269	309	0.000486634	184	1.90073e-05	66
CWH43	S000000610	YCR017C	Putative sensor/transporter protein involved in cell wall biogenesis	5	V	0	4	2.65211e-05	27	4.91821e-06	6	0.000119319	3
SRD1	S000000611	YCR018C	Protein involved in the processing of pre-rRNA to mature rRNA	2	V	0	1	2.05457e-07	2	0	1	0	1
MAK32	S000000612	YCR019W	Protein necessary for stability of L-A dsRNA-containing particles	2	V	0	1	1.71465e-05	16	5.63667e-07	2
PET18	S000000613	YCR020C	Protein of unknown function	14	V	8.28884e-07	4	8.78036e-05	26	0.000112286	4
MAK31	S000000614	YCR020C-A	Non-catalytic subunit of N-terminal acetyltransferase of the NatC type	6	V	9.47429e-05	8	0.00010837	44	0.000196965	24	0.000630582	12
HSP30	S000000615	YCR021C	Negative regulator of the H()-ATPase Pma1p	30	V	0.000397354	32	0.00011424	35	5.39071e-06	3	0	1
SLM5	S000000618	YCR024C	Mitochondrial asparaginyl-tRNA synthetase	0	V	3.02046e-05	11	3.43068e-05	19	0.000140035	10	2.37678e-05	3
PMP1	S000000619	YCR024C-A	Regulatory subunit of the plasma membrane H()-ATPase Pma1p	6	V	7.62251e-06	14	2.62515e-05	19	0	1
RHB1	S000000622	YCR027C	Putative Rheb-related GTPase	0	V	1.85938e-05	5	4.42653e-05	18	3.38405e-05	7	4.48806e-05	2
FEN2	S000000623	YCR028C	Plasma membrane H+pantothenate symporter	8	V	4.08119e-06	7	1.7274e-05	22	5.42817e-06	4
SYP1	S000000626	YCR030C	Protein of unknown function involved in endocytic site formation	4	V	0.000135505	43	0.000117424	53	0.000152484	20	1.8079e-05	3
RPS14A	S000000627	YCR031C	Ribosomal protein 59 of the small subunit	5	V	0.000155223	100	0.000418293	241	0.000481257	168	0.000478104	108
BPH1	S000000628	YCR032W	Protein homologous to Chediak-Higashi syndrome and Beige proteins	1	V	3.16303e-05	3	4.79632e-05	19	0.000446904	7	0.000486691	4
SNT1	S000000629	YCR033W	Subunit of the Set3C deacetylase complex	2	V	7.12683e-05	16	8.80653e-05	66	8.32212e-05	37	0.000250702	18
FEN1	S000000630	YCR034W	Fatty acid elongase	76	V	0.000216167	68	0.00105625	364	0.00214571	139	0.00383752	28
RRP43	S000000631	YCR035C	Exosome non-catalytic core component	3	E	9.73434e-05	27	4.3806e-05	113	4.98436e-05	27	4.32287e-05	16
RBK1	S000000632	YCR036W	Putative ribokinase	0	V	6.83317e-06	4	2.94918e-05	26	3.56779e-06	12	2.61507e-05	7
PHO87	S000000633	YCR037C	Low-affinity inorganic phosphate (Pi) transporter	11	V	1.13359e-05	5	2.91446e-05	20	8.11002e-05	11	9.82882e-05	5
BUD5	S000000634	YCR038C	GTP/GDP exchange factor for Rsr1p (Bud1p)	26	V	9.432e-05	7	8.18285e-05	36	0.000182589	19	0.000169501	6
MATALPHA2	S000000635	YCR039C	Homeobox-domain protein that represses a-specific genes in haploids	26	V	2.13486e-06	7	0.000253999	42	1.75802e-05	12	0.000419362	2
MATALPHA1	S000000636	YCR040W	Transcriptional co-activator that regulates mating-type-specific genes	6	V	1.14672e-05	3	3.45659e-06	15	6.36079e-07	8	0	1
TAF2	S000000638	YCR042C	TFIID subunit (150 kDa)	11	V	8.30076e-05	35	0.000115691	78	0.000348306	63	0.000218835	21
YCR043C	S000000639	YCR043C	Putative protein of unknown function	1	V	0.000231159	26	5.46636e-05	42	7.43461e-05	11	0	1
PER1	S000000640	YCR044C	Protein of the endoplasmic reticulum	4	V	0	2	5.91438e-05	59	7.45611e-05	12	0	2
IMG1	S000000642	YCR046C	Mitochondrial ribosomal protein of the large subunit	1	V	4.01022e-05	34	0.00015418	59	8.27828e-05	34	0.0001039	26
BUD23	S000000643	YCR047C	Methyltransferase	3	V	7.67255e-07	3	3.60414e-05	126	0.000381152	22	0.00103115	4
ARE1	S000000644	YCR048W	Acyl-CoA:sterol acyltransferase	20	V	8.29409e-07	3	9.26825e-05	32	0.000111104	13	0	3
YCR051W	S000000647	YCR051W	Putative protein of unknown function	0	V	1.31188e-05	4	1.16135e-05	24	1.86865e-05	2	0.000419362	2
RSC6	S000000648	YCR052W	Component of the RSC chromatin remodeling complex	1	E	3.88168e-05	32	2.14018e-05	38	6.00327e-05	21	0.000428186	19
THR4	S000000649	YCR053W	Threonine synthase	18	V	3.98091e-06	11	0.000228947	117	0.000155709	26	0.000514957	8
PWP2	S000000653	YCR057C	Conserved 90S pre-ribosomal component	6	E	0.000470042	107	0.0004652	391	0.000981194	260	0.000762156	142
YIH1	S000000655	YCR059C	Protein that inhibits activation of Gcn2p	2	V	6.79746e-05	8	2.49281e-05	22	7.45994e-05	13	0.000133605	8
TAH1	S000000656	YCR060W	HSP90 cofactor	5	V	0.000353308	14	7.00464e-06	20	1.03611e-05	10	8.32362e-05	6
YCR061W	S000000657	YCR062W, YCR061W	Protein of unknown function	0	V	0.000603282	26	9.96556e-05	10	0	1
BUD31	S000000659	YCR063W	Component of the SF3b subcomplex of the U2 snRNP	2	V	6.35757e-05	33	9.90418e-05	45	0.000293916	27	2.80165e-05	14
HCM1	S000000661	YCR065W	Forkhead transcription factor	6	V	2.52122e-05	11	0.000284212	98	0.0002939	28	0.000817669	9
RAD18	S000000662	YCR066W	E3 ubiqutin ligase	140	V	8.80566e-05	17	0.000227882	94	0.000348471	62	0.000821449	34
SED4	S000000663	YCR067C	Integral endoplasmic reticulum membrane GTPase activator for Sar1p	7	V	7.63517e-06	5	0.000206354	27	3.85169e-05	13	0.000816035	6
ATG15	S000000664	YCR068W	Lipase required for lysis of autophagic bodies and Cvt bodies	1	V	4.00523e-05	6	0.000160971	23	3.63161e-05	6	4.05113e-05	3
CPR4	S000000665	YCR069W	Peptidyl-prolyl cis-trans isomerase (cyclophilin)	1	V	0	2	4.98333e-07	4	0	1	0	1
IMG2	S000000667	YCR071C	Mitochondrial ribosomal protein of the large subunit	1	V	4.40464e-05	32	0.000103048	54	0.000111591	33	1.21472e-05	23
RSA4	S000000668	YCR072C	WD-repeat protein involved in ribosome biogenesis	4	E	2.74561e-05	31	8.49776e-05	337	0.000159546	210	0.000740356	102
SSK22	S000000669	YCR073C	MAP kinase kinase kinase of the HOG1 signaling pathway	7	V	0.000354633	31	5.85991e-05	32	8.93973e-05	19	0	4
ERS1	S000000671	YCR075C	Protein with similarity to human cystinosin	3	V	2.77931e-05	6	1.56694e-06	6	0	1	0	1
YCR076C	S000000672	YCR076C	Putative protein of unknown function	0	V	1.79803e-06	6	1.31872e-06	7	7.78706e-07	3	0	2
PAT1	S000000673	YCR077C	TopII-associated deadenylation-dependent mRNA-decapping factor	36	V	0.000788983	81	0.000837969	196	0.00175628	88	0.00138917	37
SRB8	S000000677	YCR081W	Subunit of the RNA polymerase II mediator complex	14	V	8.01978e-06	31	0.000118665	93	0.000139888	38	0.000203263	29
AHC2	S000000678	YCR082W	Component of the ADA histone acetyltransferase complex	2	V	0.000166893	26	3.19691e-05	23	4.76334e-05	10	1.57858e-06	3
TRX3	S000000679	YCR083W	Mitochondrial thioredoxin	9	V	1.48893e-05	9	4.57542e-05	41	5.58583e-05	16	0	3
TUP1	S000000680	YCR084C	General repressor of transcription	187	V	0.000394296	42	0.000348229	95	0.000529281	44	0.00150596	22
CSM1	S000000682	YCR086W	Nucleolar protein that mediates homolog segregation during meiosis I	12	V	0.000325689	69	0.000489422	121	0.00166991	59	0.00266702	17
ABP1	S000000684	YCR088W	Actin-binding protein of the cortical actin cytoskeleton	46	V	0.00038405	44	0.000556851	104	0.000367189	42	0.00124252	23
FIG2	S000000685	YCR089W	Cell wall adhesin	7	V	1.19806e-05	5	0.00021713	29	0.00036852	13	0.000484039	6
YCR090C	S000000686	YCR090C	Putative protein of unknown function	0	V	0	2	0	2	0	1
KIN82	S000000687	YCR091W	Putative serine/threonine protein kinase	2	V	0.000287401	35	7.13643e-05	67	1.99316e-05	7
MSH3	S000000688	YCR092C	Mismatch repair protein	75	V	6.47527e-05	11	6.7245e-05	37	1.30733e-05	18	1.37139e-05	9
CDC39	S000000689	YCR093W	Component of the CCR4-NOT transcriptional complex	34	E	0.000538095	56	0.000280782	95	0.00106968	53	0.000927217	19
CDC50	S000000690	YCR094W	Endosomal protein that interacts with phospholipid flippase Drs2p	22	V	2.03863e-05	6	0.000180575	58	0.000961681	30	0.000742337	7
OCA4	S000000691	YCR095C	Cytoplasmic protein required for replication of Brome mosaic virus	1	V	4.32571e-07	4	1.05843e-05	10	9.49783e-06	6	0	4
HMRA2	S000000692	YCR096C	Silenced copy of a2 at HMR	2	V	0	1	0.000221762	25	9.03713e-05	18	1.16814e-05	3
HMRA1	S000000694	YCR097W	Silenced copy of a1 at HMR	4	V	7.19827e-05	3	6.05336e-05	30	6.83809e-05	16	2.71779e-05	5
GIT1	S000000695	YCR098C	Plasma membrane permease	11	V	2.60639e-06	5	9.67372e-06	6	4.25811e-07	2
YCR099C	S000000696	YCR099C	Putative protein of unknown function	0	V	4.54871e-07	3	5.30112e-06	5	0.000364163	2
YCR100C	S000000697	YCR100C	Putative protein of unknown function	0	V	2.64637e-06	5	4.08063e-06	3	0	1
YCR102C	S000000699	YCR102C	Putative protein of unknown function	1	V	0	2	7.7741e-05	25	0.000382707	20	0	1
PAU3	S000000701	YCR104W	Member of the seripauperin multigene family	3	V			2.72053e-05	34	5.7802e-06	23	6.36723e-05	21
ADH7	S000000702	YCR105W	NADPH-dependent medium chain alcohol dehydrogenase	3	V	1.43316e-05	9	0.000151332	35	0.00060188	32	0	1
RDS1	S000000703	YCR106W	Putative zinc cluster transcription factor	1	V	0.000712679	15	0.00119219	29	0.000366713	4	0	2
AAD3	S000000704	YCR107W	Putative aryl-alcohol dehydrogenase	1	V	3.76627e-06	3	7.64406e-05	9	0	2	0	1
SOL2	S000000718	YCR073W-A	Protein with a possible role in tRNA export	3	V	5.38947e-05	23	1.51116e-05	26	0.000207638	15	0.00023315	9
IRC22	S000000727	YEL001C	Putative protein of unknown function	0	V	9.99482e-06	4	1.55585e-05	25	8.46124e-06	4
WBP1	S000000728	YEL002C	Beta subunit of the oligosaccharyl transferase glycoprotein complex	18	E	0.000216174	55	0.000197556	78	0.000409361	32	0.0011116	19
GIM4	S000000729	YEL003W	Subunit of the heterohexameric cochaperone prefoldin complex	1	V	1.16827e-05	7	0.00168166	228	0.000750555	70	0.00070547	25
VAB2	S000000731	YEL005C	Protein with a potential role in vacuolar function	1	V	2.60112e-05	6	0.000372484	11	3.98829e-05	6	0.000210693	4
GCN4	S000000735	YEL009C	bZIP transcriptional activator of amino acid biosynthetic genes	428	V	0.000288914	55	0.000884939	137	0.0032701	96	0.00550186	39
GLC3	S000000737	YEL011W	Glycogen branching enzyme	11	V	0	2	0.000319953	196	0.000364911	78	0.000184787	25
UBC8	S000000738	YEL012W	Ubiquitin-conjugating enzyme that regulates gluconeogenesis	4	V	3.01961e-05	13	0.00016742	125	0.000181128	24	0	1
VAC8	S000000739	YEL013W	Phosphorylated and palmitoylated vacuolar membrane protein	29	V	0.000201863	37	0.00033551	68	0.00137841	32	0.00159908	12
EDC3	S000000741	YEL015W	Non-essential conserved protein of unknown function	8	V	0.000126584	43	4.09274e-05	49	8.34669e-05	21	2.42406e-05	10
NPP2	S000000742	YEL016C	Nucleotide pyrophosphatase/phosphodiesterase family member	1	V	0	1	2.43513e-06	5	0	1
GTT3	S000000743	YEL017W	Protein of unknown function may be involved in glutathione metabolism	0	V	1.04878e-05	10	1.32827e-05	11	4.53491e-05	5	0	2
EAF5	S000000744	YEL018W	Esa1p-associated factor	3	V	2.87279e-05	17	0.00031824	115	5.75582e-05	37	0.000106635	23
MMS21	S000000745	YEL019C	SUMO ligase and component of the SMC5-SMC6 complex	17	E	8.47465e-07	7	2.43427e-05	35	9.51974e-05	24	5.81745e-05	7
URA3	S000000747	YEL021W	Orotidine-5'-phosphate (OMP) decarboxylase	560	V	4.28151e-06	6	5.7597e-05	41	0.000631822	19	0.000458491	7
GEA2	S000000748	YEL022W	Guanine nucleotide exchange factor for ADP ribosylation factors (ARFs)	13	V	7.95412e-05	26	6.8902e-05	52	0.000339287	26	0.00204882	13
YEL023C	S000000749	YEL023C	Putative protein of unknown function	0	V	1.70229e-05	18	4.32442e-05	20	0.000208591	14	0	1
RIP1	S000000750	YEL024W	Ubiquinol-cytochrome-c reductase	14	V	4.52012e-06	10	0.000735182	154	0.00216842	72	0.00504035	40
YEL025C	S000000751	SRI1, YEL025C	Putative protein of unknown function	0	V	7.47041e-07	4	2.44279e-07	3	3.53989e-06	2
SNU13	S000000752	YEL026W	RNA binding protein	6	E	0.000191713	44	0.00112249	561	0.0034331	351	0.00372385	132
VMA3	S000000753	YEL027W	Proteolipid subunit c of the V0 domain of V-ATPase	22	V	6.43215e-05	19	8.44373e-05	47	0.000136947	22	0.00102823	18
BUD16	S000000755	YEL029C	Putative pyridoxal kinase	1	V	7.23018e-06	9	3.86161e-05	15	0.000753055	13	2.35016e-08	5
ECM10	S000000756	YEL030W	Heat shock protein of the Hsp70 family	5	V	0.000287514	28	0.000103184	42	0.000144877	19	1.46237e-05	3
SPF1	S000000757	YEL031W	P-type ATPase	32	V	3.94554e-06	8	0.000418981	129	0.00108152	44	0.00123091	7
MCM3	S000000758	YEL032W	Protein involved in DNA replication	39	E	8.39901e-05	35	3.59305e-05	67	0.000344599	55	0.000638818	31
HYP2	S000000760	YEL034W	Translation elongation factor eIF-5A	6	E	0.000389788	75	0.0003787	100	0.00121469	72	0.000535252	12
ANP1	S000000762	YEL036C	Subunit of the alpha-1,6 mannosyltransferase complex	17	V	7.36092e-05	19	0.000209759	57	0.00038836	27	0.00284758	17
RAD23	S000000763	YEL037C	Protein with ubiquitin-like N terminus	101	V	0.00038707	69	0.00071866	134	0.00317419	86	0.00393496	45
UTR4	S000000764	YEL038W	Protein with sequence similarity to acireductone synthases	1	V	0	1	3.97627e-05	21	0	3	0	2
CYC7	S000000765	YEL039C	Cytochrome c isoform 2	66	V	5.11915e-05	16	0.000247223	80	0.000367395	24	0.000934825	11
UTR2	S000000766	YEL040W	Chitin transglycosylase	10	V	9.54312e-06	5	0.00032739	142	0.000346438	16	0	1
YEF1	S000000767	YEL041W	ATP-NADH kinase	4	V	1.20368e-05	6	1.06513e-05	14	6.82958e-05	3	0	2
GDA1	S000000768	YEL042W	Guanosine diphosphatase located in the Golgi	9	V	4.13544e-05	9	0.000847013	246	0.000409126	39	0.000283555	3
YEL043W	S000000769	YEL043W	Predicted cytoskeleton protein involved in intracellular signalling	0	V	5.80005e-05	16	7.41667e-05	38	6.67456e-05	10	0	1
IES6	S000000770	YEL044W	Protein that associates with the INO80 chromatin remodeling complex	3	V	6.29344e-06	12	0.000160915	36	0	11	0	9
GLY1	S000000772	YEL046C	Threonine aldolase	15	V	4.30866e-05	14	8.52664e-05	39	6.2602e-05	12	0.000107186	6
YEL047C	S000000773	FRDS1, YEL047C	Soluble fumarate reductase	4	V	2.07858e-05	11	0.000162211	50	0.000215108	19	0.000419362	3
TCA17	S000000774	YEL048C	Subunit of TRAPPII	2	V	4.38535e-05	20	2.76354e-05	26	0.000225092	18	0	10
PAU2	S000000775	YEL049W	Member of the seripauperin multigene family	1	V			2.54894e-05	31	4.29962e-06	21	4.23887e-05	20
RML2	S000000776	YEL050C	Mitochondrial ribosomal protein of the large subunit	4	V	1.15962e-06	5	0.000139501	87	0.000329895	48	0.000388698	21
VMA8	S000000777	YEL051W	Subunit D of the V1 peripheral membrane domain of V-ATPase	5	V	0.000155653	45	0.000620183	43	8.82091e-05	20	1.66445e-06	13
AFG1	S000000778	YEL052W	Protein that may act as a chaperone for cytochrome c oxidase subunits	4	V	0	1	1.11365e-05	15	7.46849e-06	3	0	1
MAK10	S000000779	YEL053C	Non-catalytic subunit of N-terminal acetyltransferase of the NatC type	13	V	4.08338e-06	7	7.31474e-06	14	7.32726e-05	5	0	2
RPL12A	S000000780	YEL054C	Protein component of the large (60S) ribosomal subunit	3	V	0.000105544	62	0.00013581	298	0.000259929	163	0.000126376	58
POL5	S000000781	YEL055C	DNA Polymerase phi	2	E	2.99355e-05	22	8.59291e-05	296	5.55696e-05	138	5.288e-05	28
HAT2	S000000782	YEL056W	Subunit of the Hat1p-Hat2p histone acetyltransferase complex	8	V	9.99254e-05	28	6.53744e-05	53	0.000327092	27	9.48317e-05	15
YEL057C	S000000783	YEL057C	Protein of unknown function involved in telomere maintenance	0	V	0	1	6.44423e-06	2	0	1
PCM1	S000000784	YEL058W	Essential N-acetylglucosamine-phosphate mutase	4	E	4.898e-06	6	2.20575e-05	20	4.71592e-05	10	0.000102551	3
PRB1	S000000786	YEL060C	Vacuolar proteinase B (yscB)	33	V	5.20051e-05	22	0.000240948	144	0.000420268	30	1.24009e-05	4
CIN8	S000000787	YEL061C	Kinesin motor protein	45	V	5.38979e-05	19	0.000503226	168	0.001559	117	0.00261846	50
NPR2	S000000788	YEL062W	Subunit of SEA (Seh1-associated), Npr2/3, and Iml1p complexes	7	V	4.06776e-05	13	3.21394e-06	11	6.52161e-06	3	0	1
CAN1	S000000789	YEL063C	Plasma membrane arginine permease	125	V	0.000430839	52	0.000374888	80	0.000337645	18	0.00155183	11
SIT1	S000000791	YEL065W	Ferrioxamine B transporter	15	V	3.4053e-05	6	4.63401e-05	21	0.000459091	10	0.0016766	4
HPA3	S000000792	YEL066W	D-Amino acid N-acetyltransferase	2	V	1.17681e-06	7	1.06451e-05	6	0	1
HXT13	S000000795	YEL069C	Hexose transporter	4	V			9.89819e-05	30	0.00170759	7	0	1
DSF1	S000000796	YEL070W	Deletion suppressor of mpt5 mutation	2	V	0	1	2.42064e-05	16	1.55276e-05	6	0	2
DLD3	S000000797	YEL071W	D-lactate dehydrogenase	6	V	4.1175e-05	13	1.25661e-05	16	3.10265e-05	6	4.78474e-05	2
YEL075C	S000000801	YEL075C	Putative protein of unknown function	0	V	2.37563e-06	2	0.000142188	40	0.000187001	28	0.000385531	14
YEL076C	S000000802	YEL076C	Putative protein of unknown function	0	V	2.37563e-06	2	0.000148888	42	0.000424297	31	0.000529512	16
MNN1	S000000803	YER001W	Alpha-1,3-mannosyltransferase	53	V	9.08474e-06	7	0.000156146	42	0.0003396	14	0.000628095	5
NOP16	S000000804	YER002W	Constituent of 66S pre-ribosomal particles	0	V	1.02409e-05	21	2.09111e-05	123	3.79567e-05	40	4.00552e-07	9
PMI40	S000000805	YER003C	Mannose-6-phosphate isomerase	6	E	1.1307e-05	8	0.000108404	53	8.3714e-05	18	9.45498e-06	5
FMP52	S000000806	YER004W	Protein of unknown function	0	V	6.11738e-06	7	1.27722e-05	25	1.33392e-06	3	0	1
YND1	S000000807	YER005W	Apyrase with wide substrate specificity	5	V	4.66676e-05	11	0.000281846	107	0.00153834	85	5.79388e-06	2
NUG1	S000000808	YER006W	GTPase that associates with nuclear 60S pre-ribosomes	2	E	0.00040388	105	0.000422557	451	0.000940665	294	0.000550866	168
PAC2	S000000809	YER007W	Microtubule effector required for tubulin heterodimer formation	4	V	1.97583e-06	8	0.00034736	41	3.9014e-05	16	7.67246e-05	9
SEC3	S000000810	YER008C	Subunit of the exocyst complex	33	E	3.22638e-05	22	7.9499e-05	57	0.00059189	47	0.000359418	18
NTF2	S000000811	YER009W	Nuclear envelope protein	20	E	1.06685e-05	12	0.000186649	186	0.000178399	49	0.000248831	8
TIR1	S000000813	YER011W	Cell wall mannoprotein of the Srp1p/Tip1p family	26	V	2.78316e-07	2	0.000112269	35	0.00100993	18	0.00046517	9
PRE1	S000000814	YER012W	Beta 4 subunit of the 20S proteasome	24	E	0.000770507	108	0.000493657	131	0.00177181	75	0.00199876	48
PRP22	S000000815	YER013W	DEAH-box RNA-dependent ATPase/ATP-dependent RNA helicase	30	E	0.000305302	49	0.000158027	61	0.00010753	22	2.23431e-06	10
HEM14	S000000816	YER014W	Protoporphyrinogen oxidase	3	V	0	2	1.29311e-05	12	1.37267e-06	3	2.536e-05	2
FAA2	S000000817	YER015W	Medium chain fatty acyl-CoA synthetase	20	V	1.10072e-06	5	1.48828e-05	19	4.27967e-05	8	3.00192e-05	3
BIM1	S000000818	YER016W	Microtubule-binding protein	32	V	9.25168e-05	34	0.00236721	258	0.0011119	106	0.00322846	51
AFG3	S000000819	YER017C	Component of the mitochondrial inner membrane m-AAA protease	22	V	3.61339e-05	11	0.000129876	49	0.000496928	22	0.000858579	9
SPC25	S000000820	YER018C	Component of the kinetochore-associated Ndc80 complex	7	E	0.000727496	71	0.000475577	117	0.00248464	105	1.86421e-05	14
ISC1	S000000821	YER019W	Inositol phosphosphingolipid phospholipase C	14	V	1.6742e-06	4	5.71126e-05	41	3.41259e-05	10
GPA2	S000000822	YER020W	Nucleotide binding alpha subunit of the heterotrimeric G protein	65	V	0.000285994	50	0.000279785	65	0.000341754	25	0.000375984	10
RPN3	S000000823	YER021W	non-ATPase regulatory subunit of the 26S proteasome	11	E	0.0015692	77	0.00129223	90	0.00267092	67	3.76716e-05	41
SRB4	S000000824	YER022W	Subunit of the RNA polymerase II mediator complex	27	E	0.000149945	61	0.000368903	99	0.000358293	64	0.000369779	36
PRO3	S000000825	YER023W	Delta 1-pyrroline-5-carboxylate reductase	11	E	3.04084e-05	20	0.000221692	85	0.000208027	17	3.18564e-05	3
YAT2	S000000826	YER024W	Carnitine acetyltransferase	1	V	2.57018e-05	8	2.77982e-05	16	6.13983e-06	4	6.61493e-06	3
GCD11	S000000827	YER025W	Gamma subunit of the translation initiation factor eIF2	7	E	0.000206508	64	0.00091807	463	0.00102065	181	0.00274189	64
CHO1	S000000828	YER026C	Phosphatidylserine synthase	43	V	8.11429e-05	21	0.000212289	83	0.00163146	48	0.00096266	8
GAL83	S000000829	YER027C	One of three possible beta-subunits of the Snf1 kinase complex	34	V	2.48489e-05	18	8.40714e-05	50	0.000201066	23	0.000519322	11
MIG3	S000000830	YER028C	Probable transcriptional repressor involved in toxic agent response	4	V	8.25611e-06	5	4.68344e-06	16	0	1
SMB1	S000000831	YER029C	Core Sm protein Sm B	0	E	0.00104835	109	0.000128442	90	0.000369698	81	0.00104932	66
CHZ1	S000000832	YER030W	Histone chaperone for Htz1p/H2A-H2B dimer	5	V	4.56823e-05	13	9.80285e-06	23	6.09263e-05	7	0	3
YPT31	S000000833	YER031C	Rab family GTPase	21	V	0.000177291	27	0.000109589	57	0.000452954	31	0.000568814	13
FIR1	S000000834	YER032W	Protein involved in 3' mRNA processing	3	V	6.37043e-05	27	8.54097e-05	49	0.000126024	18	9.56037e-05	5
ZRG8	S000000835	YER033C	Protein of unknown function	1	V	3.51663e-06	7	1.51819e-05	21	5.82467e-05	13	0	2
EDC2	S000000837	YER035W	RNA-binding protein	4	V	1.42831e-06	10	9.6203e-05	83	5.61775e-05	11	0.000419362	2
ARB1	S000000838	YER036C	ATPase of the ATP-binding cassette (ABC) family	1	E	0.000197946	70	0.000666726	316	0.00176985	119	0.00132887	17
PHM8	S000000839	YER037W	Lysophosphatidic acid (LPA) phosphatase involved in LPA hydrolysis	2	V			1.16693e-05	22	0	1
KRE29	S000000840	YER038C	Subunit of the SMC5-SMC6 complex	0	E	2.5292e-05	5	2.40177e-05	10	0.000367063	5	0.000419362	2
GLN3	S000000842	YER040W	Transcriptional activator of genes regulated by NCR	115	V	2.84885e-05	18	0.00043904	118	0.00201566	61	0.0035594	18
YEN1	S000000843	YER041W	Holliday junction resolvase	9	V	2.82736e-06	7	6.89179e-06	16	7.66785e-06	6	5.87107e-05	2
MXR1	S000000844	YER042W	Methionine-S-sulfoxide reductase	5	V	2.41875e-05	9	0.000222403	58	3.89586e-05	8	0.00086916	3
SAH1	S000000845	YER043C	S-adenosyl-L-homocysteine hydrolase	4	E	0.000106094	24	0.000458116	201	0.000748223	53	0.000944949	10
ERG28	S000000846	YER044C	Endoplasmic reticulum membrane protein	10	V	4.78689e-05	16	7.15902e-05	34	6.62598e-05	19	5.56265e-05	12
ACA1	S000000847	YER045C	Basic leucine zipper (bZIP) transcription factor	3	V	1.62582e-06	3	8.97957e-06	11	0	1
SAP1	S000000849	YER047C	Putative ATPase of the AAA family	3	V	3.54315e-05	19	2.29609e-05	21	1.89896e-05	10	3.35136e-05	4
CAJ1	S000000850	YER048C	Nuclear type II J heat shock protein of the E. coli dnaJ family	3	V	2.15121e-06	8	0.000392005	38	1.42056e-05	7
TPA1	S000000851	YER049W	Poly(rA)-binding protein involved in translation termination	4	V	1.04353e-05	15	0.0001851	276	0.00103931	124	0.000555648	23
RSM18	S000000852	YER050C	Mitochondrial ribosomal protein of the small subunit	0	V	5.2226e-05	35	5.67047e-05	56	0.000193113	30	0.000412748	17
JHD1	S000000853	YER051W	JmjC domain family histone demethylase specific for H3-K36	7	V	0	4	3.24588e-05	19	5.42102e-07	5
HOM3	S000000854	YER052C	Aspartate kinase (L-aspartate 4-P-transferase)	27	V	1.4279e-05	15	0.000536254	117	0.000811129	52	0.00150144	16
PIC2	S000000855	YER053C	Mitochondrial phosphate carrier	4	V	6.31821e-06	5	0.000268912	127	0.000265078	41	0.000838537	8
GIP2	S000000856	YER054C	Putative regulatory subunit of the protein phosphatase Glc7p	3	V	3.08653e-05	17	0.000252117	104	0.000285903	38	0.000172677	7
HIS1	S000000857	YER055C	ATP phosphoribosyltransferase	40	V	4.57441e-08	6	0.000322793	138	0.000132842	29	0.00056612	9
FCY2	S000000858	YER056C	Purine-cytosine permease	24	V	1.84364e-05	6	8.16621e-05	103	5.27682e-05	16
HMF1	S000000859	YER057C	Member of the p14.5 protein family with similarity to Mmf1p	4	V	1.43677e-05	5	7.67141e-05	20	0	1
PCL6	S000000861	YER059W	Pho85p cyclin of the Pho80p subfamily	6	V	5.14912e-05	13	0.00038267	41	0.000125623	17	0.000154913	7
FCY21	S000000862	YER060W	Putative purine-cytosine permease	1	V	3.37228e-06	3	1.27298e-05	14	0	1
CEM1	S000000863	YER061C	Beta-keto-acyl synthase with possible role in fatty acid synthesis	3	V	1.57425e-06	2	0.00017771	57	8.26075e-05	8	0.000419362	2
HOR2	S000000864	YER062C	DL-glycerol-3-phosphatase involved in glycerol biosynthesis	8	V	0.000104135	20	8.33174e-05	45	0.000264309	22	2.764e-05	3
THO1	S000000865	YER063W	Conserved nuclear RNA-binding protein	1	V	4.24216e-06	15	9.97235e-05	16	5.42908e-06	6	0	4
VHR2	S000000866	YER064C	Non-essential nuclear protein	1	V	7.11687e-05	19	5.19213e-05	18	5.99011e-05	7
ICL1	S000000867	YER065C	Isocitrate lyase	35	V	5.71302e-06	9	5.09113e-05	43	0.000187033	20	5.86868e-05	7
RGI1	S000000869	YER067W	Protein of unknown function involved in energy metabolism	3	V	8.73787e-06	7	0.000676427	98	0.000855212	30	6.02949e-05	8
MOT2	S000000870	YER068W	Component of the CCR4-NOT transcriptional complex	10	V	0.000195103	47	0.00110636	128	0.00420372	86	0.000919727	21
ARG5,6	S000000871	YER069W	Acetylglutamate kinase and N-acetyl-gamma-glutamyl-phosphate reductase	7	V	1.5087e-05	8	0.000104549	53	0.000334807	24	0.000434491	9
RNR1	S000000872	YER070W	Major isoform of the large subunit of the RNR complex	47	V	0.000118715	21	0.000322473	97	0.00121824	55	0.0014171	13
TDA2	S000000873	YER071C	Protein of unknown function	1	V	1.96384e-06	8	0.000117191	12	1.4293e-05	4	0	2
VTC1	S000000874	YER072W	Subunit of the vacuolar transporter chaperone (VTC) complex	10	V	1.76144e-05	9	8.595e-05	37	8.03228e-05	11	1.17793e-05	5
ALD5	S000000875	YER073W	Mitochondrial aldehyde dehydrogenase	5	V	6.51426e-06	6	0.000140993	71	0.000381818	41	0.000353026	14
RPS24A	S000000876	YER074W	Protein component of the small (40S) ribosomal subunit	2	V	9.04929e-05	89	0.000193568	302	0.000334519	190	0.000496256	139
PTP3	S000000877	YER075C	Phosphotyrosine-specific protein phosphatase	13	V	5.7582e-06	8	8.04493e-05	64	5.8385e-05	17	3.587e-05	8
YER076C	S000000878	YER076C	Putative protein of unknown function	0	V			5.13554e-06	9	0	2
ICP55	S000000880	YER078C	Mitochondrial aminopeptidase	1	V	7.92052e-06	7	1.41797e-05	14	5.50539e-06	6
YER079W	S000000881	YER079W	Putative protein of unknown function	0	V	8.14766e-06	6	0.000107427	158	0.000107766	51	0	1
SER3	S000000883	YER081W	3-phosphoglycerate dehydrogenase	11	V	0.000383562	24	9.64622e-05	40	2.08618e-05	7	4.07014e-05	3
UTP7	S000000884	YER082C	Nucleolar protein	1	E	0.000214826	75	0.000266612	270	0.000372207	166	0.000604739	71
GET2	S000000885	YER083C	Subunit of the GET complex	9	V	0	2	0.000634952	167	0.000161531	21	3.09715e-05	3
ILV1	S000000888	YER086W	Threonine deaminase	28	V	0.000117618	37	0.000674208	183	0.00218238	63	0.0066367	21
AIM10	S000000889	YER087W	Protein with similarity to tRNA synthetases	0	V	6.55782e-07	5	1.80365e-05	32	2.02917e-05	6
DOT6	S000000890	YER088C	Protein involved in rRNA and ribosome biogenesis	4	V	1.27197e-05	10	4.11452e-05	42	9.79127e-05	22	0.000183683	3
PTC2	S000000891	YER089C	Type 2C protein phosphatase (PP2C)	20	V	2.58224e-05	12	0.000101426	64	0.000245698	25	0.000226515	7
TRP2	S000000892	YER090W	Anthranilate synthase	11	V	7.27775e-05	19	0.000222407	86	0.000128461	24	0.000118467	6
MET6	S000000893	YER091C	Cobalamin-independent methionine synthase	8	V	1.26511e-05	14	0.00020031	91	0.000599796	31	0.000939677	14
IES5	S000000894	YER092W	Protein that associates with the INO80 chromatin remodeling complex	0	V	2.78846e-05	21	5.72132e-05	44	1.11059e-05	17	1.84867e-06	13
TSC11	S000000895	YER093C	Subunit of TORC2 (Tor2p-Lst8p-Avo1-Avo2-Tsc11p-Bit61p)	2	E	4.33403e-05	13	0.000253318	57	0.000312521	34	0.000155686	9
PUP3	S000000896	YER094C	Beta 3 subunit of the 20S proteasome	4	E	7.86035e-05	27	7.93733e-05	60	0.000291788	50	0.000378315	37
RAD51	S000000897	YER095W	Strand exchange protein	471	V	0.00094822	50	0.00106479	175	0.00402829	128	0.00468282	60
SHC1	S000000898	YER096W	Sporulation-specific activator of Chs3p (chitin synthase III)	8	V	2.8686e-06	3	4.97341e-07	5	0	1
UBP9	S000000900	YER098W	Ubiquitin carboxyl-terminal hydrolase	1	V	4.2803e-05	19	4.69661e-06	10	1.68931e-05	3
PRS2	S000000901	YER099C	5-phospho-ribosyl-1(alpha)-pyrophosphate synthetase	7	V	1.19986e-05	11	3.01313e-05	42	0.000229061	36	0.000260863	19
UBC6	S000000902	YER100W	Ubiquitin-conjugating enzyme involved in ERAD	24	V	0.000182745	21	0.000401756	68	0.000171027	18	4.53185e-05	3
AST2	S000000903	YER101C	Protein that may have a role in targeting Pma1p to the plasma membrane	0	V	6.18577e-06	6	3.09408e-05	23	0.000162225	18
RPS8B	S000000904	YER102W	Protein component of the small (40S) ribosomal subunit	1	V	5.72622e-05	84	0.000315757	286	0.000187554	178	0.000796055	119
SSA4	S000000905	YER103W	Heat shock protein that is highly induced upon stress	50	V	4.14143e-05	29	0.000233973	102	0.000331862	41	0.000952809	16
RTT105	S000000906	YER104W	Protein with a role in regulation of Ty1 transposition	0	E	5.65977e-06	3	1.13907e-05	19	5.71227e-07	7	0	2
NUP157	S000000907	YER105C	Abundant subunit of the nuclear pore complex (NPC)	5	V	9.49194e-05	38	6.58146e-05	75	0.000251482	60	0.000498988	30
MAM1	S000000908	YER106W	Monopolin	10	V	6.85389e-05	8	4.5958e-05	67	0.00050591	61	0.000132633	8
GLE2	S000000909	YER107C	Component of the Nup82 subcomplex of the nuclear pore complex	11	V	5.14802e-05	28	9.78946e-05	86	0.000279813	61	0.0039688	36
FLO8	S000000911	YER109C	Transcription factor required for flocculation	52	V	4.31051e-06	5	0.000111092	40	0.00148131	29	0.00110226	9
KAP123	S000000912	YER110C	Karyopherin beta	14	V	0.000672052	117	0.00246146	509	0.00628704	261	0.0102318	95
SWI4	S000000913	YER111C	DNA binding component of the SBF complex (Swi4p-Swi6p)	128	V	0.000109781	20	0.00126445	226	0.00284193	106	0.00357524	36
LSM4	S000000914	YER112W	Lsm (Like Sm) protein	14	E	0.00102798	94	0.000253436	86	0.000325335	60	0.000734736	32
TMN3	S000000915	YER113C	Protein with a role in cellular adhesion and filamentous growth	0	V	6.51616e-05	6	7.5556e-06	12	4.69027e-05	3	0	1
BOI2	S000000916	YER114C	Protein implicated in polar growth	7	V	0.000160286	29	0.000424199	73	0.000154209	22	3.457e-05	6
SPR6	S000000917	YER115C	Protein of unknown function	1	V	9.08472e-06	8	8.65883e-05	13	0.000446552	5
SLX8	S000000918	YER116C	Subunit of the Slx5-Slx8 SUMO-targeted ubiquitin ligase complex	21	V	8.00675e-05	22	0.000128328	100	0.000460658	61	0.000304216	17
RPL23B	S000000919	YER117W	Protein component of the large (60S) ribosomal subunit	2	V	2.37824e-05	17	0.000218783	267	0.000742449	150	0.000213372	65
SHO1	S000000920	YER118C	Transmembrane osmosensor for filamentous growth and HOG pathways	45	V	0.00114851	70	0.00120698	150	0.00160212	47	0.00077769	14
AVT6	S000000921	YER119C	Vacuolar aspartate and glutamate exporter	2	V	7.46739e-07	3	8.58271e-06	10	4.37596e-08	2
SCS2	S000000922	YER120W	Integral ER membrane protein that regulates phospholipid metabolism	16	V	7.05489e-05	25	0.000407839	98	0.00080255	39	0.000535981	10
YER121W	S000000923	YER121W	Putative protein of unknown function	1	V	0	2	1.81398e-05	23	3.39064e-06	8
GLO3	S000000924	YER122C	ADP-ribosylation factor GTPase activating protein (ARF GAP)	8	V	0.000100511	42	0.000118353	68	0.000501269	33	0.000553647	13
YCK3	S000000925	YER123W	Casein kinase I	13	V	4.39747e-05	15	6.12436e-05	34	1.78716e-05	8	7.56874e-05	4
DSE1	S000000926	YER124C	Daughter cell-specific protein	6	V	7.3093e-06	9	3.75604e-05	31	0.000189915	18	0.000195275	7
RSP5	S000000927	YER125W	E3 ubiquitin ligase of the NEDD4 family	155	E	0.00625159	253	0.00290581	260	0.0182526	175	0.016486	54
NSA2	S000000928	YER126C	Protein constituent of 66S pre-ribosomal particles	1	E	4.30172e-05	46	0.000418926	474	0.000212605	283	0.000346028	164
LCP5	S000000929	YER127W	Essential protein involved in maturation of 18S rRNA	1	E	4.80024e-05	22	0.000385396	373	0.000920482	235	0.000240178	117
VFA1	S000000930	YER128W	Protein that interacts with Vps4p and has a role in vacuolar sorting	0	V	2.12902e-05	6	1.10528e-05	5	0	2	0	2
SAK1	S000000931	YER129W	Upstream serine/threonine kinase for the SNF1 complex	11	V	2.64174e-05	22	2.98942e-05	41	9.13579e-05	17	0.000152967	9
YER130C	S000000932	YER130C	Protein of unknown function	0	V	3.42668e-07	2	1.19209e-06	7	0	1
RPS26B	S000000933	YER131W	Protein component of the small (40S) ribosomal subunit	1	V	6.89151e-05	31	0.000311889	269	0.00016092	167	0.000219896	102
PMD1	S000000934	YER132C	Protein with an N-terminal kelch-like domain	4	V	2.19788e-05	15	1.3932e-05	23	4.33571e-05	11
GLC7	S000000935	YER133W	Type 1 serine/threonine protein phosphatase catalytic subunit	111	E	0.00178484	160	0.00238879	255	0.00725427	150	0.0154122	68
GDI1	S000000938	YER136W	GDP dissociation inhibitor	6	E	4.12374e-05	18	9.39174e-05	55	0.000326003	27	0.00167133	18
YER138C	S000000940	YER138C	Retrotransposon TYA Gag and TYB Pol genes	0	V	3.5935e-05	12	7.98657e-05	29	0.000265462	18	0.000249095	13
RTR1	S000000941	YER139C	CTD phosphatase	3	V	0.000111749	31	0.000339324	39	0.000408167	26	1.86862e-05	16
YER140W	S000000942	YER140W	Putative protein of unknown function	0	V	0	1	6.62475e-06	16	4.15888e-06	2	0	1
COX15	S000000943	YER141W	Protein required for the hydroxylation of heme O to form heme A	9	V	0.000168003	8	0.000202561	68	0.000289384	14	0.000250082	7
MAG1	S000000944	YER142C	3-methyl-adenine DNA glycosylase	36	V	1.42304e-05	18	0.000475919	67	0.000216632	32	7.2477e-05	6
DDI1	S000000945	YER143W	DNA damage-inducible v-SNARE binding protein	19	V	8.93111e-05	20	7.75638e-05	50	0.000453392	33	0.00111864	10
UBP5	S000000946	YER144C	Putative ubiquitin-specific protease	3	V	5.51607e-05	10	5.3569e-05	19	4.23198e-05	7	5.68884e-05	3
FTR1	S000000947	YER145C	High affinity iron permease	41	V	5.37559e-05	28	0.000121823	54	0.000293982	18	0.000419469	5
LSM5	S000000948	YER146W	Lsm (Like Sm) protein	2	E	0.000138327	55	0.000117373	67	0.00111917	51	0.00040677	28
SCC4	S000000949	YER147C	Subunit of cohesin loading factor (Scc2p-Scc4p)	10	E	2.16043e-05	14	1.73775e-05	20	4.47084e-05	9	0.000255316	3
SPT15	S000000950	YER148W	TATA-binding protein	52	E	0.00153608	141	0.000903734	246	0.00595623	206	0.0105924	109
PEA2	S000000951	YER149C	Coiled-coil polarisome protein required for polarized morphogenesis	10	V	2.42823e-05	10	0.000205887	85	0.000213591	27	4.66209e-05	9
SPI1	S000000952	YER150W	GPI-anchored cell wall protein involved in weak acid resistance	15	V	1.33105e-06	3	0.000741989	164	0.000443211	51	0.00043804	13
UBP3	S000000953	YER151C	Ubiquitin-specific protease involved in transport and osmotic response	27	V	0.00543876	436	0.00404978	510	0.00137961	66	0.0026044	16
YER152C	S000000954	YER152C	Protein with 2-aminoadipate transaminase activity	1	V	1.5764e-06	3	6.85154e-06	5	0	1
PET122	S000000955	YER153C	Mitochondrial translational activator specific for the COX3 mRNA	17	V	1.21146e-05	5	4.56607e-05	25	0.000256732	14	5.99601e-05	4
OXA1	S000000956	YER154W	Mitochondrial inner membrane insertase	55	V	0.000341986	23	0.000298293	57	0.00135525	35	0.00354162	15
BEM2	S000000957	YER155C	Rho GTPase activating protein (RhoGAP)	28	V	0.000352429	49	0.000736966	172	0.00141432	62	0.00663628	26
YER156C	S000000958	YER156C	Putative protein of unknown function	0	V	1.16369e-06	4	0.000189654	284	0.000102938	92	0	9
COG3	S000000959	YER157W	Essential component of the conserved oligomeric Golgi complex	8	E	7.00539e-05	31	2.57017e-05	39	0.000244276	29	0.000245521	16
YER158C	S000000960	YER158C	Protein of unknown function	1	V	1.23047e-05	8	9.47976e-05	52	5.16181e-05	9
BUR6	S000000961	YER159C	Subunit of a heterodimeric NC2 transcription regulator complex	9	E	2.60274e-05	10	5.85039e-05	42	3.17919e-05	24	8.27909e-05	10
YER160C	S000000962	YER160C	Retrotransposon TYA Gag and TYB Pol genes	0	V	1.52417e-05	8	0.000103733	33	0.000209916	15	0.00024876	12
SPT2	S000000963	YER161C	Protein involved in negative regulation of transcription	23	V	0.000149737	40	0.000135254	69	0.000207633	38	0.000133192	7
RAD4	S000000964	YER162C	Protein that recognizes and binds damaged DNA during NER	99	V	0.000161636	28	0.000252874	72	0.000511107	43	0.000189027	20
CHD1	S000000966	YER164W	Chromatin remodeler that regulates various aspects of transcription	26	V	7.83782e-05	53	0.000460552	159	0.00100469	77	0.00113339	33
PAB1	S000000967	YER165W	Poly(A) binding protein	60	E	0.00124919	119	0.00118207	308	0.00221621	130	0.0040159	67
DNF1	S000000968	YER166W	Plasma membrane aminophospholipid translocase (flippase)	16	V	1.35209e-05	23	4.80761e-05	31	9.96541e-05	14	0.000647964	6
BCK2	S000000969	YER167W	Serine/threonine-rich protein involved in PKC1 signaling	12	V	3.15413e-05	15	0.000144161	70	0.00052302	38	0.0010258	18
CCA1	S000000970	YER168C	ATP (CTP):tRNA-specific tRNA nucleotidyltransferase	6	E	1.97192e-06	5	4.56174e-06	18	5.46021e-06	7	0	1
RPH1	S000000971	YER169W	JmjC domain-containing histone demethylase	9	V	5.01069e-06	5	8.20311e-06	11	2.67685e-06	5
ADK2	S000000972	YER170W	Mitochondrial adenylate kinase	2	V	7.80589e-06	3	8.74149e-05	72	0.000109122	26	9.32035e-05	7
RAD3	S000000973	YER171W	5' to 3' DNA helicase	193	E	0.000909147	49	0.00060992	144	0.0018398	122	0.00275044	42
BRR2	S000000974	YER172C	RNA-dependent ATPase RNA helicase (DEIH box)	17	E	0.000440562	93	0.000453683	123	0.0014038	95	0.00437175	76
RAD24	S000000975	YER173W	Checkpoint protein	105	V	6.72259e-05	22	0.000199634	119	0.000632671	83	0.000303466	32
GRX4	S000000976	YER174C	Glutathione-dependent oxidoreductase	16	V	2.6805e-05	19	4.9767e-05	32	0.000299076	10	0.000387399	4
TMT1	S000000977	YER175C	Trans-aconitate methyltransferase	3	V	1.01958e-07	3	0.000139482	77	0.00111105	41	0.000765128	20
ECM32	S000000978	YER176W	DNA dependent ATPase/DNA helicase	5	V	0	1	4.37605e-06	10	4.3717e-07	3	0	1
BMH1	S000000979	YER177W	14-3-3 protein	48	V	0.00114071	103	0.00150394	203	0.00604064	115	0.00669131	32
PDA1	S000000980	YER178W	E1 alpha subunit of the pyruvate dehydrogenase (PDH) complex	17	V	0.000154573	24	0.000389151	95	0.00111072	42	0.00385443	20
DMC1	S000000981	YER179W	Meiosis-specific protein involved in DSB repair and chromosome pairing	88	V	0.000446694	25	0.000908049	76	0.000505974	39	0.000911428	20
ISC10	S000000982	YER180C	Protein required for sporulation	1	V	7.80759e-07	3	9.29968e-05	18	2.15413e-05	4
FMP10	S000000984	YER182W	Putative protein of unknown function	0	V	2.25481e-06	5	4.86956e-05	42	3.18859e-05	4
FAU1	S000000985	YER183C	5,10-methenyltetrahydrofolate synthetase	1	V	0	2	2.74493e-05	22	4.58345e-06	5	0	3
YER184C	S000000986	YER184C	Putative zinc cluster protein	0	V	1.20562e-05	5	1.21646e-05	4	2.37027e-05	2	0	1
YER186C	S000000988	YER186C	Putative protein of unknown function	0	V	5.66626e-06	3	6.09171e-07	2	0	1
YER189W	S000000991	YER189W	Putative protein of unknown function	0	V	2.37563e-06	2	0.000575301	40	0.000136922	23	3.61779e-07	13
YRF1-2	S000000992	YER190W	Helicase encoded by the Y' element of subtelomeric regions	0	V	2.37563e-06	2	0.00048706	41	0.000617695	21	1.19595e-07	14
RPL14B	S000000993	YHL001W	Protein component of the large (60S) ribosomal subunit	0	V	0.000119337	81	0.000114323	263	0.00027662	159	7.91866e-05	119
HSE1	S000000994	YHL002W	Subunit of the endosomal Vps27p-Hse1p complex	16	V	0.000344945	49	0.000803689	91	0.000266115	21	0.000202161	5
LAG1	S000000995	YHL003C	Ceramide synthase component	19	V	8.34809e-05	20	8.94338e-05	35	5.32418e-05	14	0.000464278	7
MRP4	S000000996	YHL004W	Mitochondrial ribosomal protein of the small subunit	3	V	0.000513875	78	0.000518459	125	0.000943871	55	0.00138449	32
SHU1	S000000998	YHL006C	Component of the Shu complex, which promotes error-free DNA repair	6	V	3.39291e-05	7	7.44152e-06	19	5.07452e-06	12	6.26709e-08	5
STE20	S000000999	YHL007C	Cdc42p-activated signal transducing kinase of the PAK family	135	V	0.00163361	117	0.000431864	109	0.00190952	79	0.00572538	35
YHL008C	S000001000	YHL008C	Putative protein of unknown function	2	V	1.43451e-05	7	8.61116e-06	11	1.28693e-05	3
YAP3	S000001001	YHL009C	Basic leucine zipper (bZIP) transcription factor	19	V	9.90788e-05	18	3.05384e-05	15	2.98345e-05	5	0	1
ETP1	S000001002	YHL010C	Putative protein of unknown function required for growth on ethanol	1	V	1.81052e-05	7	6.79995e-06	11	1.05652e-05	3	0.000300751	2
PRS3	S000001003	YHL011C	5-phospho-ribosyl-1(alpha)-pyrophosphate synthetase	12	V	3.36715e-05	23	0.00107276	475	0.00215131	215	0.00539605	76
YHL012W	S000001004	YHL012W	Putative protein of unknown function	0	V	1.10359e-05	4	9.99937e-05	40	5.0443e-05	19	8.82644e-06	6
OTU2	S000001005	YHL013C	Protein of unknown function that may interact with ribosomes	0	V	7.51564e-06	7	1.59781e-05	64	0	1
YLF2	S000001006	YHL014C	Protein of unknown function	0	V	5.95863e-06	11	1.88389e-05	18	2.12136e-05	8
RPS20	S000001007	YHL015W	Protein component of the small (40S) ribosomal subunit	3	E	5.3095e-05	44	0.000464015	276	0.00076961	193	0.00054932	111
DUR3	S000001008	YHL016C	Plasma membrane transporter for both urea and polyamines	13	V	4.23618e-06	14	2.00204e-05	20	0.000364163	2
YHL018W	S000001010	YHL018W	Putative protein of unknown function	0	V	3.19539e-05	16	3.70494e-05	12	6.26345e-06	4	0	2
APM2	S000001011	YHL019C	Protein of unknown function	1	V	5.4014e-06	8	5.68068e-05	31	0.000160481	18	2.36926e-06	5
OPI1	S000001012	YHL020C	Transcriptional regulator of a variety of genes	73	V	0.000112148	17	0.000434106	86	0.000824992	29	0.000257038	8
AIM17	S000001013	YHL021C	Putative protein of unknown function	0	V	1.63486e-05	12	0.000335872	214	0.000735435	95	0.000793164	25
SPO11	S000001014	YHL022C	Meiosis-specific protein that initiates meiotic recombination	133	V	0.000104298	7	0.000148074	70	0.000364212	38	0.00138534	18
NPR3	S000001015	YHL023C	Subunit of SEA (Seh1-associated), Npr2/3, and Iml1p complexes	2	V	2.69132e-05	10	2.26343e-05	12	1.68704e-05	3
RIM4	S000001016	YHL024W	Putative RNA-binding protein required for sporulation gene expression	3	V	0.000113759	26	3.71792e-05	19	1.6541e-05	6	2.73065e-05	2
SNF6	S000001017	YHL025W	Subunit of the SWI/SNF chromatin remodeling complex	30	V	6.87026e-05	31	4.49687e-05	44	0.000117417	25	0.000206235	15
RIM101	S000001019	YHL027W	Transcriptional repressor involved in response to pH	48	V	2.09637e-05	7	0.000616817	97	0.000917833	36	0.00223997	14
WSC4	S000001020	YHL028W	Transmembrane receptor	3	V	0	1	8.589e-06	11	8.64178e-07	3
OCA5	S000001021	YHL029C	Cytoplasmic protein required for replication of Brome mosaic virus	1	V	0.000139301	8	0.000235542	24	2.47816e-05	6	6.26709e-08	5
ECM29	S000001022	YHL030W	Scaffold protein that assists in proteasome particle association	6	V	0.000482228	157	7.26627e-05	68	0.000175588	49	2.40345e-05	36
GOS1	S000001023	YHL031C	v-SNARE protein involved in Golgi transport	7	V	2.83367e-05	19	0.000177539	90	0.000198263	30	0.000601614	19
GUT1	S000001024	YHL032C	Glycerol kinase	10	V	1.49849e-05	8	0.000295165	64	0.000587786	19	3.46702e-05	2
RPL8A	S000001025	YHL033C	Ribosomal protein L4 of the large (60S) ribosomal subunit	0	V	0.00020387	106	0.000301284	258	0.000613435	171	0.000783779	120
SBP1	S000001026	YHL034C	Putative RNA binding protein	4	V	0.000194598	81	0.000135998	83	0.00037943	49	0.000115325	22
VMR1	S000001027	YHL035C	Vacuolar ATP-binding cassette family member involved in drug transport	3	V	1.05374e-05	6	5.90277e-05	21	1.13082e-05	3	0	1
MUP3	S000001028	YHL036W	Low affinity methionine permease	3	V	3.82078e-06	3	4.24892e-07	6	0	1
CBP2	S000001030	YHL038C	Mitochondrial protein involved in intron splicing from COB pre-mRNA	17	V	4.36888e-06	3	2.71174e-05	33	0	2	0	1
EFM1	S000001031	YHL039W	Probable lysine methyltransferase involved in eEF1A monomethylation	1	V	1.4946e-06	4	7.3556e-05	185	4.32562e-05	46	0	2
ARN1	S000001032	YHL040C	Transporter	15	V	2.33192e-07	3	5.07555e-05	30	0.00028554	10	0.000838537	2
YHL044W	S000001036	YHL044W	Putative integral membrane protein	1	V	0	4	0.00033078	5	0	1
PAU13	S000001038	YHL046C	Protein of unknown function	0	V	0	2	8.86302e-05	35	2.31588e-05	22	4.24785e-05	20
ARN2	S000001039	YHL047C	Transporter	10	V	3.53093e-07	2	1.09859e-05	22	0	3
COS8	S000001040	YHL048W	Nuclear membrane protein	2	V	0.000904808	48	9.0165e-05	24	0.000548107	5
YHL049C	S000001041	YHL049C	Putative protein of unknown function	0	V	2.37563e-06	2	0.000465969	32	1.83933e-05	18	0.000236416	10
YHL050C	S000001042	YHL050C	Putative protein of unknown function	0	V	4.8976e-06	3	0.00029429	40	0.00553686	34	0.00169735	18
OSH7	S000001043	YHR001W	Member of an oxysterol-binding protein family	4	V	9.27894e-05	21	3.32343e-05	15	3.95724e-06	4	0	2
LEU5	S000001044	YHR002W	Mitochondrial carrier protein involved in the accumulation of CoA	4	V	0	1	4.93817e-06	16	0	4	3.69697e-06	2
YHR003C	S000001045	YHR003C	Protein of unknown function	0	V	9.39962e-07	6	7.25589e-06	14	6.98664e-08	4
NEM1	S000001046	YHR004C	Probable catalytic subunit of Nem1p-Spo7p phosphatase holoenzyme	4	V	4.02483e-07	3	0.000128042	74	3.66866e-05	13	0.000292861	6
GPA1	S000001047	YHR005C	GTP-binding alpha subunit of the heterotrimeric G protein	123	V	0.000401924	25	0.0006882	85	0.00119345	46	0.00154088	19
STP2	S000001048	YHR006W	Transcription factor	18	V	9.14089e-07	3	1.06254e-05	17	3.2899e-06	5	0	1
ERG11	S000001049	YHR007C	Lanosterol 14-alpha-demethylase	34	E	0.000491999	80	0.000201269	69	0.000398856	23	0.00113041	15
SOD2	S000001050	YHR008C	Mitochondrial manganese superoxide dismutase	60	V	0.000191248	15	0.00079385	137	0.000890359	35	0.00101229	11
RPL27A	S000001052	YHR010W	Protein component of the large (60S) ribosomal subunit	1	V	0.000163769	80	8.72186e-05	220	0.000108856	146	0.000213305	102
DIA4	S000001053	YHR011W	Probable mitochondrial seryl-tRNA synthetase	1	V	1.86822e-05	6	1.93219e-05	15	2.99574e-06	3	0	1
VPS29	S000001054	YHR012W	Subunit of the membrane-associated retromer complex	5	V	9.33185e-05	15	9.04705e-05	63	7.86705e-05	12	7.08064e-05	6
ARD1	S000001055	YHR013C	Subunit of N-terminal acetyltransferase NatA	18	V	3.78233e-05	29	0.000378528	135	0.000260241	30	0.000137232	5
SPO13	S000001056	YHR014W	Meiosis-specific protein	67	V	8.9345e-06	9	0.000164523	64	0.00102975	44	0.00226731	16
MIP6	S000001057	YHR015W	Putative RNA-binding protein	0	V	2.17835e-06	5	2.45624e-06	9	1.25913e-06	3	0	2
YSC84	S000001058	YHR016C	Actin-binding protein involved in bundling of actin filaments	4	V	0.00045109	68	0.00137764	197	0.00133517	53	0.000857158	12
ARG4	S000001060	YHR018C	Argininosuccinate lyase	89	V	1.84341e-06	5	0.000694599	148	0.00199198	71	0.00199738	29
DED81	S000001061	YHR019C	Cytosolic asparaginyl-tRNA synthetase	3	E	7.18235e-05	41	0.000658113	329	0.000908034	102	0.00159439	21
YHR020W	S000001062	YHR020W	Protein of unknown function that may interact with ribosomes	0	E	6.19801e-05	30	0.00124543	400	0.00127488	132	0.00177954	20
RPS27B	S000001063	YHR021C	Protein component of the small (40S) ribosomal subunit	0	V	4.46656e-06	10	4.52406e-05	170	8.78531e-06	121	2.91964e-06	77
MYO1	S000001065	YHR023W	Type II myosin heavy chain	39	E	0.000143067	31	0.000220658	93	0.0026431	78	0.00192385	21
MAS2	S000001066	YHR024C	Larger subunit of the mitochondrial processing protease (MPP)	5	E	2.91009e-05	7	7.20331e-06	13	5.04732e-06	5	0	1
THR1	S000001067	YHR025W	Homoserine kinase	18	V	3.41161e-06	14	0.000447245	163	0.000820666	47	0.000124231	5
VMA16	S000001068	YHR026W	Subunit c'' of the vacuolar ATPase	5	V	0.000245568	38	0.000211903	106	0.000620925	35	0.000940487	19
RPN1	S000001069	YHR027C	Base subunit of the 19S regulatory particle of the 26S proteasome	19	V	0.0056005	394	0.000340056	100	0.00108249	71	0.00155537	49
DAP2	S000001070	YHR028C	Dipeptidyl aminopeptidase	4	V	1.37959e-05	8	5.33819e-05	7	0	1
YHI9	S000001071	YHR029C	Protein of unknown function	2	V	6.27269e-06	11	0.000419495	101	0.00119916	42	0.00381393	19
SLT2	S000001072	YHR030C	Serine/threonine MAP kinase	166	V	0.000786766	86	0.00229652	272	0.00740331	133	0.013526	54
RRM3	S000001073	YHR031C	DNA helicase involved in rDNA replication and Ty1 transposition	39	V	1.04738e-06	5	4.13395e-05	69	5.49296e-05	40	0.000193191	26
YHR033W	S000001075	YHR033W	Putative protein of unknown function	1	V	3.75328e-05	23	1.67026e-05	23	7.65469e-06	4	2.74129e-05	2
PIH1	S000001076	YHR034C	Protein of unresolved function	5	V	8.59144e-05	18	0.000213871	61	0.000229559	27	0.00022368	10
YHR035W	S000001077	YHR035W	Putative protein of unknown function	0	V	2.04389e-06	4	2.45044e-06	7	7.34203e-07	2
BRL1	S000001078	YHR036W	Essential nuclear envelope integral membrane protein	2	E	3.36116e-05	4	1.32825e-05	14	6.10106e-06	3	0	1
PUT2	S000001079	YHR037W	Delta-1-pyrroline-5-carboxylate dehydrogenase	24	V	0	3	0.000192953	61	0.000166987	38	0.000559183	9
RRF1	S000001080	YHR038W	Mitochondrial ribosome recycling factor	1	V	1.24017e-06	2	2.54954e-05	34	8.9536e-05	8
MSC7	S000001081	YHR039C	Protein of unknown function	0	V	2.43937e-05	20	2.58329e-05	24	2.96362e-05	7
BCD1	S000001082	YHR040W	Essential protein required for the accumulation of box C/D snoRNA	1	E	0	2	2.71767e-06	47	1.32871e-06	11	0	2
SRB2	S000001083	YHR041C	Subunit of the RNA polymerase II mediator complex	16	V	0.000109979	49	0.000227574	136	0.000260118	65	0.000474398	41
NCP1	S000001084	YHR042W	NADP-cytochrome P450 reductase	5	E	0.000352711	22	7.83843e-05	38	0.000238765	14	0.000725928	5
YHR045W	S000001087	YHR045W	Putative protein of unknown function	2	V	2.02569e-07	2	1.93833e-05	21	0	1
INM1	S000001088	YHR046C	Inositol monophosphatase	6	V	6.17069e-06	4	1.41839e-05	14	1.46226e-05	5	7.30966e-05	3
AAP1	S000001089	YHR047C	Arginine/alanine aminopeptidase	17	V	1.82797e-05	6	0.000120804	59	8.0895e-05	9	0	3
YHK8	S000001090	YHR048W	Presumed antiporter of the DHA1 family of transporters	1	V	2.18022e-06	4	1.83533e-06	3	0	1
SMF2	S000001092	YHR050W	Divalent metal ion transporter involved in manganese homeostasis	13	V	0	3	4.82127e-05	25	2.15574e-05	8	2.42444e-05	4
COX6	S000001093	YHR051W	Subunit VI of cytochrome c oxidase	18	V	2.73336e-05	7	0.000192722	93	0.000619599	50	0.00108565	31
CIC1	S000001094	YHR052W	Essential protein that interacts with proteasome components	2	V	0.000209916	133	0.00108845	502	0.0037794	342	0.00463726	203
CUP1-1	S000001095	YHR053C	Metallothionein	106	V	0	1	5.29858e-06	11	5.89533e-05	7	0.000838631	3
YHR054C	S000001096	YHR054C	Putative protein of unknown function	0	V	0	2	0	2	0	1
CUP1-2	S000001097	YHR055C	Metallothionein	3	V	2.23405e-06	2	3.13726e-05	19	5.48205e-07	4	0	1
RSC30	S000001098	YHR056C	Component of the RSC chromatin remodeling complex	3	V	9.43978e-05	26	0.000133152	44	3.63214e-05	22	1.11312e-05	17
CPR2	S000001099	YHR057C	Peptidyl-prolyl cis-trans isomerase (cyclophilin)	5	V	1.41721e-05	4	1.1614e-05	16	1.50856e-05	7
MED6	S000001100	YHR058C	Subunit of the RNA polymerase II mediator complex	11	E	6.75156e-05	39	2.46644e-05	47	3.85418e-05	33	7.37574e-05	26
FYV4	S000001101	YHR059W	Protein of unknown function	1	V	5.45943e-06	7	7.7482e-05	34	9.32426e-06	5	0.000217973	4
VMA22	S000001102	YHR060W	Peripheral membrane protein that is required for V-ATPase function	7	V	5.28043e-05	13	4.215e-05	28	3.42573e-05	7	2.60538e-05	5
GIC1	S000001103	YHR061C	Protein of unknown function involved in budding and cell polarization	14	V	7.35332e-05	22	0.00013502	80	0.000730746	59	0.000509266	16
RPP1	S000001104	YHR062C	Subunit of both RNase MRP and nuclear RNase P	6	E	0.000146644	17	0.000199016	200	0.000458565	58	0.00295191	11
PAN5	S000001105	YHR063C	2-dehydropantoate 2-reductase	3	V	6.26776e-06	12	4.22417e-06	9	0	2	0	2
SSZ1	S000001106	YHR064C	Hsp70 protein that interacts with Zuo1p	15	V	0.00038566	77	0.000523486	324	0.00134593	125	0.00189023	19
RRP3	S000001107	YHR065C	Protein involved in rRNA processing	1	E	3.97589e-06	9	9.71885e-05	300	3.62188e-05	166	3.02327e-06	32
SSF1	S000001108	YHR066W	Constituent of 66S pre-ribosomal particles	11	V	3.77167e-05	63	0.000775413	345	0.00328543	187	0.0027776	79
HTD2	S000001109	YHR067W	Mitochondrial 3-hydroxyacyl-thioester dehydratase	5	V	4.83695e-06	5	6.51161e-06	9	0	1
DYS1	S000001110	YHR068W	Deoxyhypusine synthase	3	E	3.79565e-05	12	0.000123311	230	5.77749e-05	52	0.000114457	10
RRP4	S000001111	YHR069C	Exosome non-catalytic core component	7	E	2.20694e-05	21	0.000107673	289	0.000339462	138	0.000546922	25
TRM5	S000001112	YHR070W	tRNA(m(1)G37)methyltransferase	3	E	3.08628e-06	6	0.000183569	152	0.000100683	29
PCL5	S000001113	YHR071W	Cyclin	8	V	0	3	0.000133238	80	0.000476644	39	0.00160092	12
ERG7	S000001114	YHR072W	Lanosterol synthase	25	E	7.983e-05	22	8.40514e-05	32	0.000155915	20	0.00146075	16
OSH3	S000001115	YHR073W	Member of an oxysterol-binding protein family	7	V	2.32572e-05	13	3.82607e-05	30	0.000172949	13	0	2
QNS1	S000001116	YHR074W	Glutamine-dependent NAD() synthetase	2	E	2.0501e-06	8	6.59825e-06	10	1.20186e-05	5	0	1
PPE1	S000001117	YHR075C	Carboxyl methyl esterase	6	V	2.29175e-05	4	3.15182e-05	16	1.70048e-05	5	0.000174776	4
PTC7	S000001118	YHR076W	Type 2C protein phosphatase (PP2C)	5	V	0.000218672	13	1.41847e-05	14	3.72274e-06	4	0	2
NMD2	S000001119	YHR077C	Protein involved in the nonsense-mediated mRNA decay (NMD) pathway	25	V	6.07271e-05	15	0.00017831	66	0.000494717	33	9.56308e-05	5
YHR078W	S000001120	YHR078W	High osmolarity-regulated gene of unknown function	0	V	2.48812e-05	4	1.79068e-05	19	0	1
IRE1	S000001121	YHR079C	Serine-threonine kinase and endoribonuclease	89	V	0.00163854	95	0.000341698	94	0.00119108	48	0.0017074	16
YHR080C	S000001122	YHR080C	Protein of unknown function that may interact with ribosomes	0	V	0	2	2.31713e-06	11	0	1
LRP1	S000001123	YHR081W	Nuclear exosome-associated nucleic acid binding protein	6	V	0.0001262	23	0.000262627	140	0.000261618	47	0.000419397	14
KSP1	S000001124	YHR082C	Ser/thr protein kinase	2	V	0.00536946	228	3.33474e-05	31	4.01654e-05	11	5.73641e-06	2
SAM35	S000001125	YHR083W	Essential component of the SAM/TOB complex	9	E	8.51631e-05	20	2.78088e-05	24	0.00015492	14	0.000249935	5
STE12	S000001126	YHR084W	Transcription factor that is activated by a MAPK signaling cascade	168	V	0.000145659	40	0.000582592	110	0.00243087	81	0.0045559	27
IPI1	S000001127	YHR085W	Essential component of the Rix1 complex	2	E	2.75318e-05	22	8.92319e-05	213	8.551e-06	86	1.54961e-06	19
NAM8	S000001128	YHR086W	RNA binding protein, component of the U1 snRNP protein	14	V	0.000234856	61	0.000191876	71	0.000758385	48	0.000329716	23
RTC3	S000001129	YHR087W	Protein of unknown function involved in RNA metabolism	3	V	0.000113705	5	0.000387959	169	0.000788384	65	0.00019369	17
RPF1	S000001130	YHR088W	Protein involved in assembly and export of the large ribosomal subunit	6	E	4.16842e-05	56	0.000116904	352	0.000273161	236	0.000402428	132
GAR1	S000001131	YHR089C	Protein component of the H/ACA snoRNP pseudouridylase complex	29	E	0.000432556	87	0.000442312	500	0.000841034	282	0.00112164	126
YNG2	S000001132	YHR090C	Subunit of NuA4, an essential histone acetyltransferase complex	14	V	5.7745e-05	30	4.23669e-05	57	0.00010419	30	4.93314e-05	15
HXT4	S000001134	YHR092C	High-affinity glucose transporter of the major facilitator superfamily	28	V	2.50559e-05	6	5.71133e-05	31	4.81753e-05	15	6.01391e-05	8
HXT1	S000001136	YHR094C	Low-affinity glucose transporter of the major facilitator superfamily	84	V	0.000173341	53	7.39356e-05	43	3.99614e-05	17	0.000206388	14
HXT5	S000001138	YHR096C	Hexose transporter with moderate affinity for glucose	17	V	0.000339394	33	0.000427073	98	0.000421033	32	0.000544045	12
YHR097C	S000001139	YHR097C	Putative protein of unknown function	0	V	2.11119e-05	10	0.000125381	143	0.000183422	34	0	1
SFB3	S000001140	YHR098C	Component of the Sec23p-Sfb3p heterodimer of the COPII vesicle coat	6	V	3.60029e-05	17	2.03751e-05	24	0.00018408	16	2.70213e-05	9
TRA1	S000001141	YHR099W	Subunit of SAGA and NuA4 histone acetyltransferase complexes	20	V	0.000222838	66	0.000169182	94	0.000658884	64	0.000499298	37
GEP4	S000001142	YHR100C	Mitochondrial phosphatidylglycerophosphatase (PGP phosphatase)	1	V	0	2	1.75387e-05	8	6.14022e-06	3	0	1
BIG1	S000001143	YHR101C	Integral membrane protein of the endoplasmic reticulum	5	E	0	1	4.54632e-06	26	7.82179e-06	7	0	2
KIC1	S000001144	YHR102W	Protein kinase of the PAK/Ste20 family, required for cell integrity	5	E	4.84206e-05	20	0.000423488	43	0.00024374	22	0.000377854	8
SBE22	S000001145	YHR103W	Protein involved in the transport of cell wall components	2	V	8.43155e-06	6	6.26489e-06	13	2.01366e-06	2
GRE3	S000001146	YHR104W	Aldose reductase involved in methylglyoxal	17	V	6.91995e-05	15	0.000621434	220	0.00160729	108	0.00296466	39
YPT35	S000001147	YHR105W	Endosomal protein of unknown function that contains a phox (PX) domain	1	V	7.96363e-05	21	2.25166e-05	28	8.53358e-05	7	0	1
TRR2	S000001148	YHR106W	Mitochondrial thioredoxin reductase	6	V	1.89961e-05	4	4.63982e-05	39	3.56041e-05	16	1.08943e-05	5
CDC12	S000001149	YHR107C	Component of the septin ring that is required for cytokinesis	67	E	0.000341401	47	0.000146228	77	0.000371914	49	0.000446052	22
GGA2	S000001150	YHR108W	Protein that regulates Arf1p and Arf2p to facilitate Golgi trafficking	14	V	4.29322e-05	23	0.000102282	61	0.000589067	31	0.000717465	10
CTM1	S000001151	YHR109W	Cytochrome c lysine methyltransferase	2	V			8.58934e-06	17	1.89515e-06	3	0	1
ERP5	S000001152	YHR110W	Protein with similarity to Emp24p and Erv25p	0	V	8.69811e-05	22	5.56673e-06	14	0	3	0	2
UBA4	S000001153	YHR111W	Protein that activates Urm1p before urmylation	8	V	0.000411931	20	0.000162582	83	0.000313963	25	0.00227032	12
YHR112C	S000001154	YHR112C	Protein of unknown function	0	V	2.08471e-05	15	5.22979e-05	26	8.77161e-07	2	0	1
APE4	S000001155	YHR113W	Cytoplasmic aspartyl aminopeptidase with possible vacuole function	2	V	2.53126e-05	19	4.27041e-05	35	3.23193e-06	3	0	2
BZZ1	S000001156	YHR114W	SH3 domain protein implicated in regulating actin polymerization	3	V	0.00273115	92	0.00252266	140	0.00041426	28	0.000315232	11
DMA1	S000001157	YHR115C	Protein involved in ubiquitin ligation	6	V	0.000412694	29	5.24716e-05	25	6.84145e-05	13	2.85949e-05	3
COX23	S000001158	YHR116W	Protein that functions in mitochondrial copper homeostasis	2	V	1.80296e-07	3	9.92489e-05	33	5.17245e-05	7	0	1
TOM71	S000001159	YHR117W	Mitochondrial outer membrane protein with similarity to Tom70p	5	V	5.07735e-05	15	5.97519e-05	32	0.000325519	13	3.03977e-05	5
ORC6	S000001160	YHR118C	Subunit of the origin recognition complex	17	E	9.483e-05	31	6.76273e-05	65	0.000125273	38	0.000192125	18
SET1	S000001161	YHR119W	Histone methyltransferase, subunit of the COMPASS (Set1C) complex	99	V	0.000507471	43	0.000123501	80	0.000855499	66	0.000319741	15
MSH1	S000001162	YHR120W	DNA-binding protein involved in repair of mitochondrial DNA	18	V	7.83054e-06	3	3.61124e-05	24	0.000220516	10	5.72991e-08	2
LSM12	S000001163	YHR121W	Protein of unknown function that may function in RNA processing	2	V	0.000735124	75	0.000352114	79	0.00137631	38	0.00064805	8
YHR122W	S000001164	YHR122W	Protein of unknown function required for sister chromatid cohesion	1	E	0.000184074	7	0.00037734	20	1.57812e-05	4	6.93692e-06	3
EPT1	S000001165	YHR123W	sn-1,2-diacylglycerol ethanolamine- and cholinephosphotranferase	13	V	2.15493e-05	22	4.2167e-05	21	0.000227688	9	0.000443756	4
NDT80	S000001166	YHR124W	Meiosis-specific transcription factor	51	V	6.60971e-05	6	9.47839e-05	29	0.000172972	19	0.000147823	6
YHR127W	S000001169	HSN1, YHR127W	Protein of unknown function	0	V	2.96086e-06	10	9.12151e-07	11	3.66812e-07	6	7.03994e-07	5
FUR1	S000001170	YHR128W	Uracil phosphoribosyltransferase	18	E	3.40616e-05	19	0.00110632	472	0.00215224	195	0.00216307	61
ARP1	S000001171	YHR129C	Actin-related protein of the dynactin complex	13	V	4.71824e-05	11	0.00281714	211	0.000241902	39	0.00022612	14
YHR131C	S000001173	YHR131C	Putative protein of unknown function	0	V	1.33232e-05	12	3.40059e-06	12	1.72621e-05	7	8.62264e-05	4
ECM14	S000001174	YHR132C	Putative metalloprotease with similarity to zinc carboxypeptidases	0	V	0	1	1.89944e-06	4	0	1
NSG1	S000001175	YHR133C	Protein involved in regulation of sterol biosynthesis	0	V	0.000152989	34	6.91428e-05	80	3.13112e-05	11	4.15681e-05	3
WSS1	S000001176	YHR134W	Sumoylated protein localizing to the nuclear periphery of mother cells	9	V	0.00012032	16	6.93222e-05	42	0.000125256	28	7.12439e-05	8
YCK1	S000001177	YHR135C	Palmitoylated plasma membrane-bound casein kinase I isoform	26	V	0.00937945	343	0.000561759	120	0.000637456	34	0.000288837	5
SPL2	S000001178	YHR136C	Protein with similarity to cyclin-dependent kinase inhibitors	5	V	3.70647e-05	4	7.06686e-05	25	0.000236078	11	0.000280048	8
ARO9	S000001179	YHR137W	Aromatic aminotransferase II	3	V	4.71264e-06	9	7.34047e-05	40	0.000185527	19	8.35298e-05	4
YHR138C	S000001180	YHR138C	Putative protein of unknown function	1	V	9.55526e-06	4	0.000243384	172	0.000548031	62	0.000558275	13
SPS100	S000001181	YHR139C	Protein required for spore wall maturation	3	V	2.63625e-06	3	3.23595e-05	25	3.55948e-06	3
RPL42B	S000001183	YHR141C	Protein component of the large (60S) ribosomal subunit	1	V	6.86314e-05	53	0.000296345	252	0.000870446	158	0.000586541	90
CHS7	S000001184	YHR142W	Protein of unknown function	7	V	0.000134156	27	0.000181594	65	0.000360799	17	0	2
RPC10	S000001185	YHR143W-A	RNA polymerase subunit ABC10-alpha	4	E	7.48149e-05	36	0.000667495	295	0.000857226	141	0.000256349	49
DSE2	S000001186	YHR143W	Daughter cell-specific secreted protein with similarity to glucanases	6	V	6.80055e-07	3	0.000124488	48	2.1157e-05	13	6.70161e-05	9
DCD1	S000001187	YHR144C	Deoxycytidine monophosphate (dCMP) deaminase	6	V	6.56415e-08	2	0.000240278	163	5.05408e-05	20	8.62299e-06	3
CRP1	S000001189	YHR146W	Protein that binds to cruciform DNA structures	3	V	4.08393e-06	6	6.36122e-07	8	4.97971e-06	4	0	2
MRPL6	S000001190	YHR147C	Mitochondrial ribosomal protein of the large subunit	0	V	1.84073e-05	16	9.65469e-05	94	0.000153026	57	0.000484386	35
IMP3	S000001191	YHR148W	Component of the SSU processome	7	E	1.15003e-05	46	0.000157496	374	0.000521191	254	0.00016482	152
SKG6	S000001192	YHR149C	Integral membrane protein that localizes primarily to growing sites	2	V	2.3758e-06	5	4.92514e-06	16	1.2197e-05	6	5.36498e-05	4
PEX28	S000001193	YHR150W	Peroxisomal integral membrane peroxin	4	V	1.41715e-06	2	4.23668e-05	23	1.52417e-05	4	1.20332e-05	2
MTC6	S000001194	YHR151C	Protein of unknown function	0	V			1.73309e-05	23	9.88339e-06	6	0	2
SPO12	S000001195	YHR152W	Nucleolar protein of unknown function	29	V	0.000572654	59	0.000335016	76	0.00117264	54	0.000891034	16
SPO16	S000001196	YHR153C	Meiosis-specific protein involved in synaptonemal complex assembly	6	V	9.82798e-06	2	8.50414e-06	10	8.52467e-06	2	0	1
RTT107	S000001197	YHR154W	Protein implicated in Mms22-dependent DNA repair during S phase	10	V	0.000185144	44	0.000204959	96	0.00161605	62	0.000288352	17
YSP1	S000001198	YHR155W	Mitochondrial protein with a potential role in programmed cell death	0	V	6.8626e-06	4	2.57225e-06	5	5.69386e-06	2
LIN1	S000001199	YHR156C	Non-essential component of U5 snRNP	1	V	0.000117178	16	8.4853e-05	33	0.00044036	17	0.000151695	6
REC104	S000001200	YHR157W	Protein involved in early stages of meiotic recombination	17	V	0.000307916	10	1.18153e-05	18	1.32461e-05	11	9.71476e-05	7
KEL1	S000001201	YHR158C	Protein required for proper cell fusion and cell morphology	5	V	0.000189067	36	8.39401e-05	47	0.000687884	25	0.000340925	10
TDA11	S000001202	YHR159W	Putative protein of unknown function	0	V	0	2	1.22342e-05	5	0	1
PEX18	S000001203	YHR160C	Peroxin required for targeting of peroxisomal matrix proteins	9	V	2.9453e-05	6	4.5793e-05	19	7.2685e-06	11	4.2807e-05	6
YAP1801	S000001204	YHR161C	Protein involved in clathrin cage assembly	2	V	5.43879e-05	21	4.93661e-05	30	0.000205224	12	5.72838e-05	5
SOL3	S000001206	YHR163W	6-phosphogluconolactonase	3	V			3.62529e-05	36	3.11554e-06	6	2.90362e-05	5
DNA2	S000001207	YHR164C	DNA replication factor with ATPase, nuclease, and helicase activities	61	E	9.19345e-05	17	9.5303e-05	56	0.000432551	41	0.000113931	19
PRP8	S000001208	YHR165C	Component of the U4/U6-U5 snRNP complex	64	E	0.00112091	99	0.000564003	130	0.00247767	99	0.00555373	77
CDC23	S000001209	YHR166C	Subunit of the Anaphase-Promoting Complex/Cyclosome (APC/C)	33	E	0.000143984	30	0.000173855	66	0.000332531	51	0.000262083	24
THP2	S000001210	YHR167W	Subunit of the THO complex	6	V	2.82209e-05	29	0.000424563	104	0.000356762	44	0.000645472	21
MTG2	S000001211	YHR168W	Putative GTPase	1	V	6.13175e-07	3	4.05979e-05	32	1.94673e-05	5	0	1
DBP8	S000001212	YHR169W	ATPase, putative RNA helicase	3	E	0.000125633	53	0.000357997	396	0.00053869	272	0.000912596	164
NMD3	S000001213	YHR170W	Protein involved in nuclear export of the large ribosomal subunit	23	E	0.00013933	52	0.000517273	498	0.0016909	338	0.00375363	216
ATG7	S000001214	YHR171W	Autophagy-related protein and dual specificity member of the E1 family	26	V	9.16598e-06	9	0.000163163	74	5.82834e-05	18	2.01488e-05	7
SPC97	S000001215	YHR172W	Component of the microtubule-nucleating Tub4p (gamma-tubulin) complex	6	E	1.15675e-05	11	2.04816e-05	19	1.41732e-05	11	8.72168e-07	4
ENO2	S000001217	YHR174W	Enolase II	18	V	0.000438965	56	0.000563293	122	0.000196542	31	0.000145829	10
CTR2	S000001218	YHR175W	Putative low-affinity copper transporter of the vacuolar membrane	4	V	3.65501e-06	8	2.48342e-05	26	2.31348e-05	10	0.000269711	3
FMO1	S000001219	YHR176W	Flavin-containing monooxygenase	15	V	0	1	1.85272e-05	14	7.48994e-07	2
STB5	S000001221	YHR178W	Transcription factor	7	V	1.24223e-06	6	0.000186941	67	9.81319e-05	15	6.3448e-05	2
OYE2	S000001222	YHR179W	Conserved NADPH oxidoreductase containing flavin mononucleotide (FMN)	6	V	8.67234e-05	28	4.88612e-05	19	0.000101374	8	0.000920832	2
SVP26	S000001224	YHR181W	Integral membrane protein of the early Golgi apparatus and ER	6	V	3.05369e-05	12	5.22123e-05	40	2.42992e-05	7	0.000419362	3
YHR182W	S000001225	YHR182W	Putative protein of unknown function	0	V	3.31125e-05	12	1.03829e-05	10	9.59541e-07	2
GND1	S000001226	YHR183W	6-phosphogluconate dehydrogenase (decarboxylating)	12	V	9.65116e-05	34	0.000120591	60	0.000100782	18	0.000354322	11
SSP1	S000001227	YHR184W	Protein involved in the control of meiotic nuclear division	10	V	3.78556e-06	8	1.4481e-05	25	3.45965e-05	18	1.30271e-05	2
PFS1	S000001228	YHR185C	Sporulation protein required for prospore membrane formation	1	V	2.63971e-05	13	9.44427e-06	12	5.69459e-05	9	1.07481e-05	2
KOG1	S000001229	YHR186C	Subunit of TORC1	7	E	0.000178147	42	9.32877e-05	61	0.00024059	34	0.000132877	9
IKI1	S000001230	YHR187W	Subunit of Elongator complex	3	V	5.4633e-05	15	0.000128079	79	0.000148764	26	2.57079e-05	10
GPI16	S000001231	YHR188C	Subunit of the glycosylphosphatidylinositol transamidase complex	2	E	0.000179378	13	5.6042e-05	15	6.74577e-05	10	0	4
PTH1	S000001232	YHR189W	One of two mitochondrially-localized peptidyl-tRNA hydrolases	5	V	0	1	8.69146e-05	57	9.15286e-05	16	0	5
ERG9	S000001233	YHR190W	Farnesyl-diphosphate farnesyl transferase (squalene synthase)	25	E	3.98422e-05	18	5.9008e-05	36	0.000187876	18	0.000280619	11
CTF8	S000001234	YHR191C	Subunit of a Ctf18 RFC-like complex	12	V	0.000150358	9	0.000204688	124	0.000423056	59	0.00363552	30
EGD2	S000001236	YHR193C	Alpha subunit of the nascent polypeptide-associated complex (NAC)	8	V	0.000413789	37	0.000300034	201	0.000956447	89	0.000963781	18
MDM31	S000001237	YHR194W	Mitochondrial inner membrane protein with similarity to Mdm32p	2	V	1.71568e-07	3	1.57121e-05	19	2.7934e-05	7	8.2254e-06	5
NVJ1	S000001238	YHR195W	Nuclear envelope protein	7	V	6.46502e-05	12	2.13525e-05	16	8.46812e-06	4	7.97552e-05	4
UTP9	S000001239	YHR196W	Nucleolar protein	2	E	7.60914e-05	72	0.000159504	319	0.00028389	189	0.000264015	94
RIX1	S000001240	YHR197W	Essential component of the Rix1 complex	5	E	0.000247994	84	0.000435091	448	0.000706038	299	0.000653805	197
AIM18	S000001241	YHR198C	Putative protein of unknown function	0	V	4.65286e-05	5	6.83738e-05	27	6.25142e-05	4
RPN10	S000001243	YHR200W	Non-ATPase base subunit of the regulatory particle of the proteasome	40	V	0.00439602	382	0.00106049	184	0.00252381	105	0.00505886	61
PPX1	S000001244	YHR201C	Exopolyphosphatase	23	V	5.41379e-06	5	9.87897e-07	4	2.88542e-06	2	0	1
YHR202W	S000001245	YHR202W	Putative protein of unknown function	0	V	1.82952e-06	4	7.40807e-09	2	0	1
RPS4B	S000001246	YHR203C	Protein component of the small (40S) ribosomal subunit	0	V	0.000227551	99	0.000125033	208	0.000273252	150	0.00102591	119
MNL1	S000001247	YHR204W	Alpha-1,2-specific exomannosidase of the endoplasmic reticulum	14	V	1.77003e-06	6	2.64608e-05	30	0.000119029	8	1.5055e-05	2
SCH9	S000001248	YHR205W	Protein kinase homologous to mammalian Akt/PKB	82	V	0.000125519	28	0.000389327	94	0.00218413	60	0.000724994	16
SKN7	S000001249	YHR206W	Nuclear response regulator and transcription factor	70	V	9.85906e-05	22	0.000352395	94	0.000869078	41	0.00201955	14
BAT1	S000001251	YHR208W	Mitochondrial branched-chain amino acid aminotransferase	16	V	1.62338e-05	8	0.000180304	85	0.000319869	32	0.0013763	10
CRG1	S000001252	YHR209W	S-AdoMet-dependent methyltransferase involved in lipid homeostasis	1	V	6.6838e-06	5	8.15446e-05	33	0	2
FLO5	S000001254	YHR211W	Lectin-like cell wall protein (flocculin) involved in flocculation	21	V	2.07514e-05	5	4.27912e-05	17	0.000396884	6	0.000110938	3
YHR213W	S000001256	YHR213W	Possible pseudogene	0	V	2.37563e-06	2	7.11234e-06	8	0.000396762	3	0	1
YHR214W	S000001257	YHR214W	Putative protein of unknown function	1	V	0	1	2.82575e-05	14	0	1
PHO12	S000001258	YHR215W	One of three repressible acid phosphatases	3	V	7.2316e-08	2	1.38359e-05	17	1.75078e-05	5	0	1
IMD2	S000001259	YHR216W	Inosine monophosphate dehydrogenase	17	V	0.000190574	39	0.000146812	85	0.000141989	24	0.00018554	12
YHR218W	S000001261	YHR218W	Helicase-like protein encoded within the telomeric Y' element	0	V	2.37563e-06	2	0.000611739	45	0.000202745	25	0.00121137	15
YHR219W	S000001262	YHR219W	Putative protein of unknown function with similarity to helicases	0	V	2.37563e-06	2	0.000412238	39	0.000585606	29	0.000542071	15
YIL001W	S000001263	YIL001W	Putative protein of unknown function	0	V	0	2	8.89702e-06	5	0	2	0	1
INP51	S000001264	YIL002C	Phosphatidylinositol 4,5-bisphosphate 5-phosphatase	5	V	0.00037848	11	0.000364681	40	0.000281895	20	0.000853384	7
CFD1	S000001265	YIL003W	Iron-sulfur cluster binding protein	8	E	6.41704e-07	3	5.65811e-05	18	1.98109e-05	6	0	2
BET1	S000001266	YIL004C	Type II membrane protein required for vesicular transport	35	E	0.00040372	34	5.85548e-05	65	0.000327549	48	0.000574794	25
EPS1	S000001267	YIL005W	ER protein with chaperone and co-chaperone activity	4	V	1.07329e-05	6	2.71705e-05	25	1.656e-05	8	0.000622441	4
NAS2	S000001269	YIL007C	Assembly chaperone for the 19S proteasome regulatory particle base	5	V	2.19821e-05	20	1.43314e-05	22	4.08974e-05	17	6.77882e-05	12
URM1	S000001270	YIL008W	Ubiquitin-like protein involved in thiolation of cytoplasmic tRNAs	12	V	5.70182e-05	6	0.00025968	174	0.000306915	44	0.000873394	12
FAA3	S000001271	YIL009W	Long chain fatty acyl-CoA synthetase	2	V	9.92876e-07	5	2.86674e-05	20	3.10912e-05	7
DOT5	S000001272	YIL010W	Thiol peroxidase which functions as an alkyl-hydroperoxide reductase	3	V	6.62603e-06	7	1.74168e-05	21	1.13525e-06	2	0	1
TIR3	S000001273	YIL011W	Cell wall mannoprotein of the Srp1p/Tip1p family	3	V	0	2	0.000361364	49	0.00046072	21	5.8754e-08	3
PDR11	S000001275	YIL013C	ATP-binding cassette (ABC) transporter	10	V	1.42185e-05	6	8.38555e-05	28	0	1
BAR1	S000001277	YIL015W	Aspartyl protease secreted into the periplasmic space of a cells	30	V	0	1	5.71489e-05	24	0.000160765	12	5.76434e-06	5
SNL1	S000001278	YIL016W	Protein involved in nuclear pore organization and protein folding	2	V	0.000548364	52	0.00105526	52	0.000384452	29	0.000249843	7
VID28	S000001279	YIL017C	Protein involved in proteasome-dependent degradation of FBPase	1	V	7.66661e-05	9	4.37241e-05	20	4.81663e-07	7	2.06993e-05	7
RPL2B	S000001280	YIL018W	Protein component of the large (60S) ribosomal subunit	2	V	8.13756e-05	90	0.000647337	323	0.000662393	181	0.000490674	102
FAF1	S000001281	YIL019W	Protein involved in pre-rRNA processing and ribosomal subunit assembly	1	E	1.17572e-05	45	0.000156464	340	0.000166286	214	3.1406e-05	103
HIS6	S000001282	YIL020C	Phosphoribosylformimino-5aminoimidazole carboxamide ribotide isomerase	55	V	1.9106e-05	4	5.78132e-05	51	4.75577e-05	9	0	2
RPB3	S000001283	YIL021W	RNA polymerase II third largest subunit B44	31	E	0.000248387	78	0.000414654	191	0.00170508	162	0.00151331	54
TIM44	S000001284	YIL022W	Essential component of the TIM23 complex	58	E	4.54924e-05	24	3.37907e-05	39	0.000264233	24	0.000401733	14
YKE4	S000001285	YIL023C	Zinc transporter	1	V	9.0874e-06	4	2.55311e-05	11	9.11685e-05	5	0.000966104	3
IRR1	S000001288	YIL026C	Subunit of the cohesin complex	11	E	0.000155346	18	5.4735e-05	34	0.000109457	21	0.000452898	12
KRE27	S000001289	YIL027C	Member of a transmembrane complex involved in ER protein folding	0	V	0.000175476	33	8.21215e-05	30	0	1
YIL029C	S000001291	YIL029C	Putative protein of unknown function	1	V	0	1	5.34541e-06	11	3.27076e-07	2	0	1
SSM4	S000001292	YIL030C	Ubiquitin-protein ligase involved in ER-associated protein degradation	19	V	0.000552342	88	0.000117625	69	0.00058065	35	0.000731501	11
ULP2	S000001293	YIL031W	Peptidase that deconjugates Smt3/SUMO-1 peptides from proteins	20	E	8.67045e-06	7	7.47042e-05	41	8.77795e-05	24	0.000180598	10
BCY1	S000001295	YIL033C	Regulatory subunit of the cyclic AMP-dependent protein kinase (PKA)	96	V	0.000225709	38	0.000291247	108	0.000862668	48	0.000352117	11
CAP2	S000001296	YIL034C	Beta subunit of the capping protein (CP) heterodimer	16	V	0.000127148	23	0.000392973	54	0.000612769	25	5.03665e-05	8
CKA1	S000001297	YIL035C	Alpha catalytic subunit of casein kinase 2 (CK2)	17	V	0.00163465	169	0.000615673	184	0.00229603	128	0.0011667	27
CST6	S000001298	YIL036W	Basic leucine zipper (bZIP) transcription factor	5	V	4.59202e-05	15	2.43254e-05	26	0.000433665	12	0	1
PRM2	S000001299	YIL037C	Pheromone-regulated protein	1	V	0	1	5.55646e-06	11	0	1
NOT3	S000001300	YIL038C	Component of the CCR4-NOT transcriptional complex	6	V	5.24619e-05	32	6.42794e-05	67	0.000480628	42	3.35361e-05	11
TED1	S000001301	YIL039W	Conserved phosphoesterase domain-containing protein	0	V	6.80654e-07	4	0.000104191	44	0.000207274	7
APQ12	S000001302	YIL040W	Protein required for nuclear envelope morphology	4	V	0	1	0.000186435	118	0.00052448	52	0.000480467	11
GVP36	S000001303	YIL041W	BAR domain-containing protein that localizes to Golgi vesicles	3	V	1.01893e-05	9	2.762e-05	22	8.20605e-06	5	0	1
PKP1	S000001304	YIL042C	Mitochondrial protein kinase	2	V	3.94315e-07	4	4.59204e-07	5	1.52041e-05	2	0.000419362	2
CBR1	S000001305	YIL043C	Microsomal cytochrome b reductase	2	V	8.57057e-05	31	0.000115107	55	0.000634963	21	0	1
AGE2	S000001306	YIL044C	ADP-ribosylation factor (ARF) GTPase activating protein (GAP) effector	4	V	3.7061e-07	3	2.72903e-05	34	1.5455e-05	8	0	2
PIG2	S000001307	YIL045W	Putative type-1 protein phosphatase targeting subunit	1	V	3.02371e-05	16	3.46013e-05	41	2.25764e-05	11	0	2
MET30	S000001308	YIL046W	F-box protein containing five copies of the WD40 motif	36	E	0.000114592	27	0.000401212	52	0.000124974	22	0.000331494	9
SYG1	S000001309	YIL047C	Plasma membrane protein of unknown function	3	V	1.31126e-05	10	1.02535e-05	11	1.24931e-06	3	0	1
NEO1	S000001310	YIL048W	Putative aminophospholipid translocase (flippase)	8	E	1.73764e-05	12	5.24124e-05	23	0.000100689	11	4.71231e-06	2
DFG10	S000001311	YIL049W	Probable polyprenol reductase that converts polyprenol to dolichol	2	V	0	1	1.76553e-05	23	0	3
PCL7	S000001312	YIL050W	Pho85p cyclin of the Pho80p subfamily	6	V	1.70491e-05	10	8.58422e-06	21	0.000136866	11	0.00022586	5
MMF1	S000001313	YIL051C	Mitochondrial protein required for transamination of isoleucine	5	E	0.000215292	23	9.31161e-05	30	0.0005931	13
RPL34B	S000001314	YIL052C	Protein component of the large (60S) ribosomal subunit	4	V	5.62513e-06	10	0.000157703	203	6.89066e-05	139	4.36275e-05	107
RHR2	S000001315	YIL053W	Constitutively expressed isoform of DL-glycerol-3-phosphatase	3	V	0.000124522	31	7.34251e-05	37	0.000620524	20	0.000771806	5
VHR1	S000001318	YIL056W	Transcriptional activator	2	V	1.01451e-05	6	3.64218e-05	21	1.98587e-06	4
RGI2	S000001319	YIL057C	Protein of unknown function involved in energy metabolism	1	V	5.43476e-06	5	3.77357e-05	17	0	1
YIL060W	S000001322	YIL060W	Putative protein of unknown function	0	V	4.13833e-06	9	0.000140855	14	0	1
SNP1	S000001323	YIL061C	Component of U1 snRNP required for mRNA splicing via spliceosome	7	E	0.000666383	78	4.58723e-05	46	0.000219462	37	0.000278894	25
ARC15	S000001324	YIL062C	Subunit of the ARP2/3 complex	1	E	6.35014e-05	21	2.70256e-05	35	1.10941e-05	14	1.23836e-06	9
YRB2	S000001325	YIL063C	Protein of unknown function involved in Ran-GTPase nuclear processes	8	E	0.000135285	24	0.000161241	84	0.0004834	67	0.000102097	10
SEE1	S000001326	YIL064W	Probable lysine methyltransferase involved in dimethylation of eEF1A	2	V	9.42987e-07	3	0.000116718	155	0.00041269	48	0	1
FIS1	S000001327	YIL065C	Protein involved in mitochondrial fission and peroxisome abundance	26	V	1.9589e-05	14	3.24096e-05	20	9.53965e-06	8	8.91048e-05	5
RNR3	S000001328	YIL066C	Minor isoform of the large subunit of the RNR complex	54	V	2.7359e-05	17	0.000234622	73	0.00036642	34	0.000251691	8
YIL067C	S000001329	YIL067C	Uncharacterized protein of unknown function	0	V	0	1	0	1	0	1
SEC6	S000001330	YIL068C	Essential 88kDa subunit of the exocyst complex	50	E	0.000153577	23	7.42162e-05	46	0.000227165	31	0.000155194	13
RPS24B	S000001331	YIL069C	Protein component of the small (40S) ribosomal subunit	0	V	0.000359711	96	0.000109535	160	0.00296231	103	5.39449e-05	74
MAM33	S000001332	YIL070C	Michochondrial matrix protein involved in oxidative phosphorylation	1	V	0.000660584	88	0.000295494	97	0.00284577	58	0.00239226	14
PCI8	S000001333	YIL071C	Possible shared subunit of Cop9 signalosome (CSN) and eIF3	3	V	2.98622e-06	11	2.27907e-06	15	3.27851e-05	13	0.000464306	9
HOP1	S000001334	YIL072W	Meiosis-specific DNA binding protein	65	V	5.18006e-06	7	0.000121753	53	1.25002e-05	13	3.89869e-05	7
SPO22	S000001335	YIL073C	Meiosis-specific protein essential for chromosome synapsis	7	V	1.5841e-06	2	2.12249e-06	9	1.69205e-05	2	0	1
SER33	S000001336	YIL074C	3-phosphoglycerate dehydrogenase	2	V	1.5234e-05	15	5.06803e-05	24	8.77504e-05	8	0	2
RPN2	S000001337	YIL075C	Subunit of the 26S proteasome	15	E	0.0003621	71	0.000103419	69	0.000249167	56	0.00048	44
SEC28	S000001338	YIL076W	Epsilon-COP subunit of the coatomer	5	V	9.37048e-05	32	0.000357029	107	0.000386459	32	0.000591381	11
YIL077C	S000001339	YIL077C	Putative protein of unknown function	0	V	1.15e-05	8	5.06167e-05	17	1.17911e-06	2	0	1
THS1	S000001340	YIL078W	Threonyl-tRNA synthetase	2	E	8.93382e-05	27	0.000561437	289	0.000623582	107	0.00034819	15
AIR1	S000001341	YIL079C	Zinc knuckle protein	8	V	3.45136e-05	16	0.000224552	191	0.000127361	33	0.000189103	11
CAB2	S000001345	YIL083C	Probable phosphopantothenoylcysteine synthetase (PPCS)	1	E	0	1	6.1189e-05	12	0.000113209	4	0.000419362	2
SDS3	S000001346	YIL084C	Component of the Rpd3p/Sin3p deacetylase complex	7	V	3.39815e-05	27	8.77662e-05	84	0.000173751	44	0.000185841	19
AIM19	S000001349	YIL087C	Putative protein of unknown function	0	V	0	2	5.6549e-05	117	6.01049e-06	20
ICE2	S000001352	YIL090W	Integral ER membrane protein with type-III transmembrane domains	3	V			0.000177538	76	0.000250661	18	0.000177963	3
UTP25	S000001353	YIL091C	Protein involved in pre-RNA processing and ribosomal biogenesis	3	E	4.97201e-05	21	2.75776e-05	210	1.62033e-05	101	1.79632e-05	25
YIL092W	S000001354	YIL092W	Putative protein of unknown function	0	V	4.09695e-06	4	1.41178e-05	6	0	1
RSM25	S000001355	YIL093C	Mitochondrial ribosomal protein of the small subunit	0	V	2.75969e-05	32	3.07561e-06	34	9.67871e-06	31	0.000123288	30
LYS12	S000001356	YIL094C	Homo-isocitrate dehydrogenase	2	V	0.000468897	53	0.000176581	75	0.0006602	31	0.000569721	8
PRK1	S000001357	YIL095W	Protein serine/threonine kinase	35	V	0.000689027	91	0.000253152	91	0.00105558	42	0.000224065	13
YIL096C	S000001358	YIL096C	Putative S-adenosylmethionine-dependent methyltransferase	0	V	3.53595e-07	4	9.07278e-05	344	0.000239199	229	8.9586e-05	127
FYV10	S000001359	YIL097W	Subunit of GID complex	0	V	2.94837e-07	8	2.52989e-05	34	3.48732e-05	8	2.06993e-05	7
FMC1	S000001360	YIL098C	Mitochondrial matrix protein	4	V	4.02829e-05	4	4.58773e-05	50	8.9186e-05	9	0	1
SGA1	S000001361	YIL099W	Sporulation-specific glucoamylase involved in glycogen degradation	9	V	0	1	8.17771e-05	41	0.000298035	18	9.83657e-06	2
XBP1	S000001363	YIL101C	Transcriptional repressor that binds to the promoters of cyclin genes	14	V	4.85792e-05	11	0.000222305	107	0.000505624	34
DPH1	S000001365	YIL103W	Protein required for synthesis of diphthamide	6	V	1.01097e-05	19	0.000217611	310	0.00062732	170	0.000546306	39
SHQ1	S000001366	YIL104C	Chaperone protein required for the assembly of box H/ACA snoRNP	4	E	1.75789e-05	10	7.42789e-05	80	2.12583e-05	14	1.34123e-06	5
SLM1	S000001367	YIL105C	Phosphoinositide PI4,5P(2) binding protein	15	V	0.000341878	50	0.000319961	90	0.000746969	45	0.000958017	12
MOB1	S000001368	YIL106W	Component of the mitotic exit network	24	E	0.000433888	40	0.000235439	85	0.000371357	29	2.46157e-05	10
PFK26	S000001369	YIL107C	6-phosphofructo-2-kinase	7	V	0.000166451	28	0.000118934	98	0.000356709	24	0	6
YIL108W	S000001370	YIL108W	Putative metalloprotease	0	V	0.000152668	9	3.14212e-05	15	2.74363e-05	6
SEC24	S000001371	YIL109C	Component of the Sec23p-Sec24p heterodimer of the COPII vesicle coat	83	E	0.000286846	40	0.000114877	56	0.000764909	32	0.000732193	17
HPM1	S000001372	YIL110W	AdoMet-dependent methyltransferase	1	V	0	1	0.000279067	304	0.00014978	125	0	11
COX5B	S000001373	YIL111W	Subunit Vb of cytochrome c oxidase	21	V	0.000132768	8	3.59283e-05	24	1.38801e-06	12	0	1
HOS4	S000001374	YIL112W	Subunit of the Set3 complex	1	V	4.3719e-05	15	1.0764e-05	34	5.20776e-05	17	0.000102057	9
SDP1	S000001375	YIL113W	Stress-inducible dual-specificity MAP kinase phosphatase	6	V	1.13073e-06	6	7.23131e-05	65	2.52108e-05	8	0	2
POR2	S000001376	YIL114C	Putative mitochondrial porin (voltage-dependent anion channel)	3	V	4.28193e-05	10	1.58276e-06	10	0	2	0	1
NUP159	S000001377	YIL115C	Nucleoporin, subunit of the Nup82 subcomplex of the nuclear pore	21	E	0.00016331	49	0.000120704	106	0.000181967	73	0.000892685	41
HIS5	S000001378	YIL116W	Histidinol-phosphate aminotransferase	28	V	8.02853e-07	3	0.000474438	116	0.000288709	46	0.00198506	21
PRM5	S000001379	YIL117C	Pheromone-regulated protein	0	V	1.90624e-06	4	1.54655e-05	12	0	1
RHO3	S000001380	YIL118W	GTPase of the Rho/Rac subfamily of Ras-like proteins	35	E	0.000101613	16	0.000300064	80	0.000129893	34	0.000386141	18
RPI1	S000001381	YIL119C	Putative transcriptional regulator	4	V	1.05506e-05	4	1.08378e-05	14	3.95753e-05	8	0	1
QDR1	S000001382	YIL120W	Multidrug transporter of the major facilitator superfamily	4	V	0.000346718	7	7.1771e-06	12	0	2	0	1
QDR2	S000001383	YIL121W	Multidrug transporter of the major facilitator superfamily	4	V	1.62397e-05	21	8.77516e-05	31	0.000126624	6	0.000419362	2
POG1	S000001384	YIL122W	Nuclear chromatin-associated protein of unknown function	4	V	6.24901e-05	13	6.61498e-05	29	5.29937e-05	9	7.00477e-06	3
SIM1	S000001385	YIL123W	Protein of the SUN family	7	V	0	3	0.000159392	56	0.00121824	26	0.000665342	7
AYR1	S000001386	YIL124W	NADPH-dependent 1-acyl dihydroxyacetone phosphate reductase	2	V	0.00011289	20	0.000279435	128	0.000316502	35	0.000726675	4
KGD1	S000001387	YIL125W	Subunit of the mitochondrial alpha-ketoglutarate dehydrogenase complex	9	V	0.000121582	29	0.000213608	93	0.000356185	37	0.00249647	14
STH1	S000001388	YIL126W	ATPase component of the RSC chromatin remodeling complex	29	E	0.000232966	59	0.000240245	113	0.000732915	67	0.00182542	33
RRT14	S000001389	YIL127C	Putative protein of unknown function	0	V	2.36726e-05	5	0.000142448	318	5.45995e-05	211	4.32349e-05	98
MET18	S000001390	YIL128W	DNA repair and TFIIH regulator	4	V	5.45964e-05	20	0.00014872	63	0.000400853	25	0.000308899	4
TAO3	S000001391	YIL129C	Component of the RAM signaling network	8	E	6.27085e-06	10	4.93662e-05	37	0.000644551	21	0.000522766	6
ASG1	S000001392	YIL130W	Zinc cluster protein proposed to be a transcriptional regulator	1	V	1.9557e-05	7	3.2215e-06	8	0	1
FKH1	S000001393	YIL131C	Forkhead family transcription factor	18	V	0.000116446	28	0.000103375	52	9.25089e-05	18	0.000335808	10
CSM2	S000001394	YIL132C	Component of the Shu complex, which promotes error-free DNA repair	5	V	2.79593e-06	4	2.55796e-05	14	2.11654e-05	7	7.32473e-05	3
RPL16A	S000001395	YIL133C	N-terminally acetylated protein component of the 60S ribosomal subunit	5	V	0.000150672	112	0.000149256	263	0.000153512	175	0.000184149	137
FLX1	S000001396	YIL134W	Protein required for transport of flavin adenine dinucleotide (FAD)	5	V	0	1	4.00309e-05	15	0	1
VHS2	S000001397	YIL135C	Cytoplasmic protein of unknown function	1	V	3.58616e-05	21	0.000194007	25	2.93528e-05	13	3.94946e-05	3
OM45	S000001398	YIL136W	Protein of unknown function	2	V	4.34868e-06	8	0.000475409	251	0.00147613	125	0.00236688	49
TMA108	S000001399	YIL137C	Ribosome-associated protein that is involved in ribosome biogenesis	0	V	1.98197e-05	7	3.02693e-05	22	5.55349e-07	2
TPM2	S000001400	YIL138C	Minor isoform of tropomyosin	7	V	2.39658e-06	8	4.66276e-05	19	1.28248e-06	7	2.1772e-05	4
REV7	S000001401	YIL139C	Accessory subunit of DNA polymerase zeta	38	V	5.7072e-05	8	3.24877e-05	34	7.35029e-06	19	2.78759e-06	6
AXL2	S000001402	YIL140W	Integral plasma membrane protein required for axial budding	7	V	6.10485e-05	13	5.92492e-05	42	0.000170978	21	0.000470631	9
CCT2	S000001404	YIL142W	Subunit beta of the cytosolic chaperonin Cct ring complex	29	E	0.000229724	45	8.00176e-05	67	0.000635577	48	0.000850844	18
SSL2	S000001405	YIL143C	Component of RNA polymerase transcription factor TFIIH holoenzyme	29	E	0.000228414	25	0.000244506	89	0.000720016	76	0.000786151	33
TID3	S000001406	YIL144W	Component of the kinetochore-associated Ndc80 complex	26	E	0.000388156	70	0.000299494	115	0.000687007	81	0.000341868	33
PAN6	S000001407	YIL145C	Pantothenate synthase	2	V	0	1	0.000367234	44	0.000597151	14	0.0120852	4
ATG32	S000001408	YIL146C	Mitochondrial-anchored transmembrane receptor	9	V	3.06747e-07	3	1.96858e-06	6	7.23911e-06	4	5.29144e-06	2
SLN1	S000001409	YIL147C	Histidine kinase osmosensor that regulates a MAP kinase cascade	71	E	0.000353534	16	5.71102e-05	43	0.000532188	25	0.000108787	9
RPL40A	S000001410	YIL148W	Ubiquitin and ribosomal L40A fusion protein	1	V	0.000312649	48	0.00147339	304	0.00449353	166	0.0048895	85
MLP2	S000001411	YIL149C	Myosin-like protein associated with the nuclear envelope	11	V	0.000532739	41	0.000136554	46	0.000581525	38	3.21316e-05	6
MCM10	S000001412	YIL150C	Chromatin-associated protein involved in DNA replication initiation	34	E	2.55927e-05	28	5.63793e-05	72	0.000322893	64	0.000678058	31
YIL151C	S000001413	YIL151C	Putative protein of unknown function	0	V	1.01471e-05	7	7.46231e-06	10	0	1
YIL152W	S000001414	YIL152W	Putative protein of unknown function	0	V	3.43433e-05	8	1.61873e-05	9	9.92443e-06	4
RRD1	S000001415	YIL153W	Peptidyl-prolyl cis/trans-isomerase	19	V	7.67291e-05	19	0.000137387	46	3.95745e-05	16	0.000179022	10
IMP2'	S000001416	YIL154C	Transcriptional activator	1	V	2.77993e-06	7	6.03575e-05	33	6.03278e-05	10
GUT2	S000001417	YIL155C	Mitochondrial glycerol-3-phosphate dehydrogenase	15	V	0	3	0.000350948	133	0.000581224	37	0.00210499	14
UBP7	S000001418	YIL156W	Ubiquitin-specific protease that cleaves ubiquitin-protein fusions	1	V	0.000379796	30	8.1858e-05	32	8.07363e-05	12	7.89327e-06	2
COA1	S000001419	YIL157C	Mitochondrial membrane protein required for assembly of complex IV	5	V	2.5735e-05	7	2.6897e-05	25	2.01766e-05	10	2.60333e-05	6
AIM20	S000001420	YIL158W	Putative protein of unknown function	0	V	0	2	3.09094e-05	14	5.78458e-07	4
BNR1	S000001421	YIL159W	Formin	28	V	0.000145168	20	0.000188229	81	0.000826621	47	0.000256505	16
POT1	S000001422	YIL160C	3-ketoacyl-CoA thiolase with broad chain length specificity	24	V	1.99458e-06	6	0.00029208	86	0.000591333	28	0.000258096	8
YIL161W	S000001423	YIL161W	Putative protein of unknown function	2	V	2.90158e-05	17	4.78662e-06	13	0	2	0	1
SUC2	S000001424	YIL162W	Invertase	231	V	1.1893e-06	6	0.000236273	81	0.000633242	27	0.000191366	4
NIT1	S000001426	YIL164C	Nitrilase	0	V			5.50624e-06	32	0.000364163	3	0	1
YIL165C	S000001427	YIL165C	Putative protein of unknown function	0	V	0	1	3.79272e-05	17	0	1	0	1
YIL169C	S000001431	HPF1', YIL169C	Putative protein of unknown function	1	V	0.000179069	4	8.9577e-05	10	1.08061e-05	4	0	3
IMA3	S000001434	YIL172C	Alpha-glucosidase	1	V	4.93733e-06	5	1.50662e-05	12	2.12812e-05	8
VTH1	S000001435	YIL173W	Putative membrane glycoprotein with similarity to Vth1p and Pep1p	1	V	8.01679e-05	10	5.03517e-05	13	1.2929e-05	3	0	1
PAU14	S000001438	YIL176C	Protein of unknown function	0	V			6.58836e-06	35	4.90205e-05	26	6.36723e-05	21
YIL177C	S000001439	YIL177C	Putative protein of unknown function	0	V	1.11638e-05	5	0.00025708	44	0.00244651	28	0.014153	16
SGN1	S000001440	YIR001C	Cytoplasmic RNA-binding protein	2	V	7.8348e-05	25	0.000154758	42	9.17564e-05	19	0.00023918	7
MPH1	S000001441	YIR002C	Member of the DEAH family of helicases	17	V	1.08884e-05	11	0.000181722	57	0.0001847	33	0.000287222	16
AIM21	S000001442	YIR003W	Protein of unknown function involved in mitochondrial migration	0	V	1.35661e-05	15	3.43121e-05	26	9.69843e-05	14	0.000210374	7
DJP1	S000001443	YIR004W	Cytosolic J-domain-containing protein	1	V	6.01319e-05	8	4.71973e-05	28	3.85217e-05	9	0.000587607	4
IST3	S000001444	YIR005W	Component of the U2 snRNP	6	V	4.19442e-05	19	0.000663935	122	0.000366159	46	0.000394221	22
PAN1	S000001445	YIR006C	Part of actin cytoskeleton-regulatory complex Pan1p-Sla1p-End3p, asso	36	E	5.34255e-05	29	0.000419731	63	0.00106191	40	0.00112467	17
YIR007W	S000001446	YIR007W	Putative protein of unknown function	1	V	1.54096e-06	10	5.35164e-06	12	1.22441e-05	7
PRI1	S000001447	YIR008C	Subunit of DNA primase	8	E	5.29276e-06	12	6.18571e-05	76	0.000242073	52	0.000338818	30
MSL1	S000001448	YIR009W	U2B component of U2 snRNP	6	V	6.95191e-05	39	2.44168e-05	29	0.000142883	25	1.03078e-06	14
DSN1	S000001449	YIR010W	Essential component of the MIND kinetochore complex	5	E	0.00995116	486	0.00544716	499	3.83633e-05	56	0.00140837	45
STS1	S000001450	YIR011C	Protein required for localizing proteasomes to the nucleus	15	E	7.96851e-07	5	2.38918e-05	26	7.47788e-05	13	5.47926e-05	2
SQT1	S000001451	YIR012W	Essential protein involved in 60S ribosomal assembly or modification	2	E	7.67979e-07	7	0.000834323	357	0.000243386	219	0.000496683	83
RPR2	S000001454	YIR015W	Subunit of nuclear RNase P	1	E	2.43639e-05	12	2.56768e-06	16	3.55573e-05	14	1.17508e-08	8
YIR016W	S000001455	YIR016W	Putative protein of unknown function	0	V	0	2	2.31106e-05	71	2.34032e-06	8
MET28	S000001456	YIR017C	bZIP transcriptional activator that regulates sulfur metabolism	7	V	4.11511e-05	12	0.000166351	53	0.00029505	20	0.000351046	7
YAP5	S000001457	YIR018W	Basic leucine zipper (bZIP) iron-sensing transcription factor	5	V	5.56531e-08	4	4.69463e-05	30	2.16141e-05	6	0	1
MUC1	S000001458	YIR019C	GPI-anchored cell surface glycoprotein (flocculin)	96	V	4.63417e-06	4	0.000797644	120	0.0030516	64	0.000817167	8
MRS1	S000001460	YIR021W	Protein required for the splicing of two mitochondrial group I introns	10	V	2.14776e-06	6	7.41826e-06	9	0.000103095	7	0.000419362	3
SEC11	S000001461	YIR022W	18kDa catalytic subunit of the Signal Peptidase Complex (SPC)	12	E	0.000110999	13	4.43824e-05	33	3.9027e-05	8	0	3
DAL81	S000001462	YIR023W	Positive regulator of genes in multiple nitrogen degradation pathways	27	V	5.919e-06	7	0.000135928	51	0.0006972	29	0.000829661	11
YIR024C	S000001463	GIF1, YIR024C	Protein of unknown function	0	V	9.38915e-06	6	5.64177e-06	8	1.79774e-05	4
MND2	S000001464	YIR025W	Subunit of the Anaphase-Promoting Complex/Cyclosome (APC/C)	7	V	0.00012546	23	4.43111e-05	35	5.63694e-05	23	0.000113556	18
YVH1	S000001465	YIR026C	Protein phosphatase involved in vegetative growth at low temperatures	12	V	3.60535e-05	31	0.00066468	409	0.000562607	250	0.00204367	107
DAL1	S000001466	YIR027C	Allantoinase	9	V			3.92649e-05	33	9.6425e-05	12	0	2
DAL4	S000001467	YIR028W	Allantoin permease	18	V	0	1	7.34476e-05	40	2.00354e-06	4
DAL2	S000001468	YIR029W	Allantoicase	9	V	0	2	1.74655e-05	23	4.0038e-05	10	4.6676e-05	6
DCG1	S000001469	YIR030C	Protein of unknown function	1	V	0	1	5.15884e-05	8	0	1
DAL7	S000001470	YIR031C	Malate synthase	16	V	0	1	5.35717e-05	43	0.000536242	32	0.00130144	9
DAL3	S000001471	YIR032C	Ureidoglycolate hydrolase	6	V	3.74164e-06	5	3.59336e-05	18	4.39436e-05	10	0.000850592	8
MGA2	S000001472	YIR033W	ER membrane protein involved in regulation of OLE1 transcription	23	V	0.000295557	30	0.000573107	107	0.000341929	22	0.00128032	9
LYS1	S000001473	YIR034C	Saccharopine dehydrogenase (NAD, L-lysine-forming)	33	V	6.57268e-05	14	0.000482664	108	0.00114964	50	0.00109378	20
YIR035C	S000001474	YIR035C	Putative cytoplasmic protein of unknown function	0	V	6.87773e-05	10	2.33718e-05	9	7.1651e-07	3	0	1
IRC24	S000001475	YIR036C	Putative benzil reductase	0	V	0	5	4.80927e-06	11	1.86082e-06	2
HYR1	S000001476	YIR037W	Thiol peroxidase that functions as a hydroperoxide receptor	7	V	0.00015752	28	0.000243056	111	0.000641025	34	0.00270499	15
GTT1	S000001477	YIR038C	ER associated glutathione S-transferase capable of homodimerization	11	V	0.000990675	67	0.00161538	233	0.00166604	85	0.00236379	19
YPS6	S000001478	YIR039C	Putative GPI-anchored aspartic protease	0	V	6.32569e-07	2	0.000328254	11	0	2
PAU15	S000001480	YIR041W	Protein of unknown function	0	V	0	1	0.000112478	39	3.80821e-05	26	6.36723e-05	21
YIR042C	S000001481	YIR042C	Putative protein of unknown function	0	V	0	1	7.34451e-05	14	0.000368747	3
MET14	S000001484	YKL001C	Adenylylsulfate kinase	18	V	6.5817e-06	6	0.000251578	55	0.000306432	22	0.00221227	11
DID4	S000001485	YKL002W	Class E Vps protein of the ESCRT-III complex	3	V	0.000210055	18	0.000191311	42	4.41736e-05	21	0.000104984	10
MRP17	S000001486	YKL003C	Mitochondrial ribosomal protein of the small subunit	2	V	6.07168e-06	12	8.31805e-05	60	0.000229762	16	3.39143e-05	9
AUR1	S000001487	YKL004W	Phosphatidylinositol:ceramide phosphoinositol transferase	15	E	0.000105835	24	0.000130772	84	0.000719536	15	0.00123572	6
BYE1	S000001488	YKL005C	Negative regulator of transcription elongation	1	V	8.55833e-06	5	9.4122e-07	11	1.97823e-06	5	0	1
RPL14A	S000001489	YKL006W	N-terminally acetylated protein component of the 60S ribosomal subunit	1	V	4.42667e-05	31	0.000147257	236	0.000258866	160	3.85901e-05	109
CAP1	S000001490	YKL007W	Alpha subunit of the capping protein (CP) heterodimer	24	V	8.81703e-05	23	0.000606479	82	0.000674637	34	0.00100085	16
LAC1	S000001491	YKL008C	Ceramide synthase component	14	V	0.000226362	38	0.000358735	46	0.000214012	17	0.000478988	6
MRT4	S000001492	YKL009W	Protein involved in mRNA turnover and ribosome assembly	7	V	0.000253055	103	0.000972795	557	0.0015768	355	0.00234335	231
UFD4	S000001493	YKL010C	Ubiquitin-protein ligase (E3) that interacts with Rpt4p and Rpt6p	6	V	0.000130032	34	0.000105935	50	0.000346124	24	0.000103715	4
CCE1	S000001494	YKL011C	Mitochondrial cruciform cutting endonuclease	24	V	5.62807e-06	3	6.5399e-05	12	2.353e-05	5
PRP40	S000001495	YKL012W	U1 snRNP protein involved in splicing	8	E	0.0022892	139	0.000141846	60	0.000213906	35	0.000543168	23
ARC19	S000001496	YKL013C	Subunit of the ARP2/3 complex	0	E	5.19607e-05	17	3.31472e-05	37	2.44721e-06	13	5.07623e-06	10
URB1	S000001497	YKL014C	Nucleolar protein required for accumulation of 25S and 5.8S rRNAs	2	E	0.000227089	82	0.000279952	318	6.82716e-05	152	1.8461e-05	68
PUT3	S000001498	YKL015W	Transcriptional activator of proline utilization genes, constitutivel	24	V	1.25293e-05	11	1.84425e-05	18	0.000173201	10	0.00024986	4
ATP7	S000001499	YKL016C	Subunit d of the stator stalk of mitochondrial F1F0 ATP synthase	1	V	0.000219124	22	9.64738e-05	77	0.00061722	50	0.000462239	27
HCS1	S000001500	YKL017C	Hexameric DNA polymerase alpha-associated DNA helicase A	3	V	0	1	1.44885e-05	24	1.19574e-05	9
SWD2	S000001501	YKL018W	Subunit of the COMPASS (Set1C) complex	11	E	0.00032929	39	0.000135319	51	0.000388276	37	0.00148577	26
RAM2	S000001502	YKL019W	Alpha subunit of farnesyltransferase and geranylgeranyltransferase	16	E	0.000352675	6	1.45863e-05	10	7.06571e-06	4	5.26385e-06	2
SPT23	S000001503	YKL020C	ER membrane protein involved in regulation of OLE1 transcription	22	V	4.43361e-05	14	9.03498e-05	43	0.000126485	18	0.000391037	7
MAK11	S000001504	YKL021C	Protein involved in an early step of 60S ribosomal subunit biogenesis	13	E	9.80687e-06	45	0.000207447	316	7.88371e-05	158	2.10453e-06	41
CDC16	S000001505	YKL022C	Subunit of the Anaphase-Promoting Complex/Cyclosome (APC/C)	44	E	4.9894e-05	28	8.65086e-05	62	0.000206789	47	0.000386124	25
YKL023W	S000001506	YKL023W	Putative protein of unknown function	0	V	0.000163612	30	1.68203e-05	20	1.55706e-05	8	9.99114e-06	5
URA6	S000001507	YKL024C	Uridylate kinase	8	E	2.24164e-06	2	2.60888e-05	44	9.14163e-05	18	4.84414e-05	5
PAN3	S000001508	YKL025C	Essential subunit of the Pan2p-Pan3p poly(A)-ribonuclease complex	6	V	4.63932e-05	15	5.8065e-05	40	9.91647e-05	19	1.98145e-05	3
GPX1	S000001509	YKL026C	Phospholipid hydroperoxide glutathione peroxidase	10	V	1.50407e-05	2	0.00017467	131	0.000154601	40	0.000555094	8
YKL027W	S000001510	YKL027W	Protein of unknown function	0	V	0	1	5.28835e-06	12	7.1595e-06	3
TFA1	S000001511	YKL028W	TFIIE small subunit	6	E	0.000220631	30	0.000154459	75	0.00142725	65	0.00127998	16
MAE1	S000001512	YKL029C	Mitochondrial malic enzyme	13	V	7.91683e-05	58	0.000443514	65	0.00109889	38	0.00136838	19
IXR1	S000001515	YKL032C	Protein that binds DNA intrastrand cross-links formed by cisplatin	10	V	1.37945e-05	4	0.000122992	57	6.3091e-05	15	0.000239443	3
TTI1	S000001516	YKL033W	Putative protein of unknown function	1	E	9.47696e-05	7	2.33149e-05	8	7.96136e-06	7	0.000419362	3
TUL1	S000001517	YKL034W	Golgi-localized RING-finger ubiquitin ligase (E3)	4	V	0	2	7.14675e-06	17	1.0332e-06	4	0	2
UGP1	S000001518	YKL035W	UDP-glucose pyrophosphorylase (UGPase)	7	E	5.00055e-05	20	0.000793647	156	0.00084839	52	0.000957699	19
AIM26	S000001520	YKL037W	Putative protein of unknown function	1	V	1.23787e-05	4	7.86085e-05	19	0	1
RGT1	S000001521	YKL038W	Transcription factor that regulates expression of several HXT genes	42	V	7.86546e-06	13	5.17654e-05	44	8.30023e-05	18	0.000234437	10
PTM1	S000001522	YKL039W	Protein of unknown function	1	V	3.21487e-05	10	1.27727e-05	13	3.2774e-05	4
NFU1	S000001523	YKL040C	Protein involved in iron metabolism in mitochondria	3	V	4.2733e-06	5	4.28499e-05	24	0	7	4.62673e-06	3
VPS24	S000001524	YKL041W	Subunit of the ESCRT-III complex	10	V	7.86146e-05	10	0.000106731	51	4.46441e-05	22	0.00012538	13
SPC42	S000001525	YKL042W	Central plaque component of spindle pole body (SPB)	11	E	8.34012e-05	36	8.33277e-05	51	0.000136696	25	0.000221354	7
PHD1	S000001526	YKL043W	Transcriptional activator that enhances pseudohyphal growth	16	V	4.45775e-06	5	0.000330977	12	0.000435974	11	0	1
PRI2	S000001528	YKL045W	Subunit of DNA primase	8	E	3.08206e-05	11	0.000163669	79	0.000230433	49	0.000147442	26
DCW1	S000001529	YKL046C	Putative mannosidase	3	V	4.74698e-08	3	3.29093e-06	5	1.91853e-06	2	0	1
YKL047W	S000001530	YKL047W	Putative protein of unknown function	0	V	3.49447e-06	5	5.8371e-05	10	3.09728e-07	3
ELM1	S000001531	YKL048C	Serine/threonine protein kinase that regulates cellular morphogenesis	40	V	7.13707e-05	32	0.000296761	105	0.000838922	47	0.00135099	17
CSE4	S000001532	YKL049C	Centromere protein that resembles histone H3	63	E	0.00442795	315	8.2289e-05	74	0.000287572	54	0.000471341	20
YKL050C	S000001533	YKL050C	Protein of unknown function	0	V	1.41022e-05	5	1.53725e-06	3	0	1
SFK1	S000001534	YKL051W	Plasma membrane protein that may act to generate normal levels of PI4P	1	V	0.000316589	52	9.49215e-06	11	2.96298e-06	2	0	1
ASK1	S000001535	YKL052C	Essential subunit of the Dam1 complex (aka DASH complex)	17	E	4.17407e-05	18	1.49895e-05	53	0.000198229	52	7.99589e-05	16
DEF1	S000001537	YKL054C	RNAPII degradation factor	7	V	0.000481884	50	0.00015133	49	0.000186636	22	2.09773e-05	4
OAR1	S000001538	YKL055C	Mitochondrial 3-oxoacyl-[acyl-carrier-protein] reductase	2	V	0	1	9.08888e-06	15	7.31986e-07	4	0	1
TMA19	S000001539	YKL056C	Protein that associates with ribosomes	4	V	0.000155237	24	0.000286528	264	0.000369495	134	0.000242154	63
NUP120	S000001540	YKL057C	Subunit of the Nup84p subcomplex of the nuclear pore complex (NPC)	10	V	8.45762e-05	29	0.0012678	140	0.000799	66	0.000944192	40
TOA2	S000001541	YKL058W	TFIIA small subunit	13	E	0.000180324	14	0.000145748	67	0.000524565	55	0.000104069	24
MPE1	S000001542	YKL059C	Essential subunit of CPF (cleavage and polyadenylation factor)	2	E	7.80555e-05	22	2.63975e-05	26	6.28228e-05	22	0.000207188	17
FBA1	S000001543	YKL060C	Fructose 1,6-bisphosphate aldolase	10	E	0.000112376	39	0.000545393	134	0.000678277	56	0.00172847	24
BLI1	S000001544	YKL061W	Putative protein of unknown function	0	V	0.000176806	12	6.84515e-05	13	8.09053e-05	8	0.000797571	5
MSN4	S000001545	YKL062W	Transcriptional activator related to Msn2p	108	V	6.75866e-05	19	0.000291612	122	0.000318755	36	0.000162409	13
MNR2	S000001547	YKL064W	Vacuolar membrane protein required for magnesium homeostasis	1	V	6.15507e-05	17	8.16889e-05	17	0.000259992	6	0	1
YET1	S000001548	YKL065C	Endoplasmic reticulum transmembrane protein	2	V	0.000328905	60	0.000214719	119	0.000225185	20	0	1
YNK1	S000001550	YKL067W	Nucleoside diphosphate kinase	4	V	2.54081e-05	23	0.00130411	212	0.0020005	81	0.00365893	20
NUP100	S000001551	YKL068W	Subunit of the nuclear pore complex (NPC)	16	V	0.00014511	51	0.000177953	124	0.00032228	74	0.000285158	35
YKL069W	S000001552	YKG9, fRMsr, YKL069W	Methionine-R-sulfoxide reductase	3	V	5.50664e-07	6	6.31623e-05	32	0.000101115	7	0	1
YKL070W	S000001553	YKL070W	Putative protein of unknown function	0	V	0	1	1.15097e-06	5	0	1
YKL071W	S000001554	YKL071W	Putative protein of unknown function	2	V	3.59878e-07	3	6.04496e-06	8	0	1
STB6	S000001555	YKL072W	Protein that binds Sin3p in a two-hybrid assay	1	V	0	1	1.60182e-06	7	0	1	0	1
LHS1	S000001556	YKL073W	Molecular chaperone of the endoplasmic reticulum lumen	9	V	2.48996e-05	14	0.000224338	77	0.000294849	21	2.16137e-05	5
MUD2	S000001557	YKL074C	Protein involved in early pre-mRNA splicing	19	V	3.39984e-05	23	0.000195276	101	0.000309847	46	0.000504536	20
YKL075C	S000001558	YKL075C	Putative protein of unknown function	0	V	6.79786e-05	6	2.15672e-06	7	8.02919e-07	2	0	1
DHR2	S000001561	YKL078W	Predominantly nucleolar DEAH-box ATP-dependent RNA helicase	2	E	8.07883e-07	9	0.000278847	376	0.000240437	240	0.00105222	146
SMY1	S000001562	YKL079W	Protein that interacts with Myo2p	6	V	6.73147e-05	15	0.000123824	57	9.0757e-05	19	0.000412547	7
VMA5	S000001563	YKL080W	Subunit C of the V1 peripheral membrane domain of V-ATPase	13	V	7.56398e-05	27	2.2574e-05	39	0.000112372	22	5.4442e-05	15
TEF4	S000001564	YKL081W	Gamma subunit of translational elongation factor eEF1B	6	V	0.000214808	62	0.000813427	351	0.0024581	151	0.00374229	41
RRP14	S000001565	YKL082C	Essential protein, constituent of 66S pre-ribosomal particles	3	E	7.33705e-05	25	0.00018761	280	0.000250394	160	8.43396e-06	49
HOT13	S000001567	YKL084W	Zinc-binding mitochondrial intermembrane space (IMS) protein	1	V	0	2	1.80267e-06	9	4.28061e-07	3	0	2
MDH1	S000001568	YKL085W	Mitochondrial malate dehydrogenase	18	V	0.000228994	29	0.000381291	145	0.00181417	71	0.00272643	28
SRX1	S000001569	YKL086W	Sulfiredoxin	5	V	0	4	8.20288e-06	12	1.81601e-05	6	0.000154709	4
CYT2	S000001570	YKL087C	Cytochrome c1 heme lyase	8	V	1.33293e-06	3	6.96793e-05	47	4.68505e-05	7	1.00325e-05	3
CAB3	S000001571	YKL088W	Subunit of a phosphopantothenoylcysteine decarboxylase (PPCDC)	3	E	5.5819e-05	24	8.12689e-05	35	0.000349123	21	0.00144767	12
MIF2	S000001572	YKL089W	Kinetochore protein with homology to human CENP-C	31	E	0.00015469	32	0.000205715	99	0.000648684	75	0.00028406	17
CUE2	S000001573	YKL090W	Protein of unknown function	2	V	6.14139e-05	7	4.88533e-05	8	3.35113e-06	3	0	1
YKL091C	S000001574	SFH1, YKL091C	Putative homolog of Sec14p	9	V	2.22497e-05	10	0.000278354	218	0.000853702	96	0.00231641	27
BUD2	S000001575	YKL092C	GTPase activating factor for Rsr1p/Bud1p	15	V	4.75067e-06	6	7.57735e-05	42	9.38232e-05	15	0.000438745	6
MBR1	S000001576	YKL093W	Protein involved in mitochondrial functions and stress response	7	V	4.96346e-05	18	6.26456e-05	42	6.53648e-05	8
YJU3	S000001577	YKL094W	Monoglyceride lipase (MGL)	2	V	8.64579e-06	10	5.57712e-06	12	4.67976e-06	5	4.76771e-05	3
YJU2	S000001578	YKL095W	Essential protein required for pre-mRNA splicing	5	E	4.04123e-05	36	1.43128e-05	37	5.6654e-05	26	3.17413e-05	17
CWP1	S000001579	YKL096W	Cell wall mannoprotein that localizes to daughter cell birth scars	21	V	0	1	7.09281e-05	35	3.2715e-05	5	1.88013e-07	2
MTC2	S000001581	YKL098W	Protein of unknown function	0	V	0	1	3.64978e-06	11	9.91461e-06	4
UTP11	S000001582	YKL099C	Subunit of U3-containing Small Subunit (SSU) processome complex	0	E	5.87033e-06	10	7.0587e-05	238	3.30612e-05	138	5.12538e-06	54
YKL100C	S000001583	YKL100C	Putative protein of unknown function	0	V	0.00014826	3	9.40642e-06	38	1.39463e-05	3
HSL1	S000001584	YKL101W	Protein kinase that regulates the morphogenesis and septin checkpoints	49	V	0.00133356	107	0.000314914	107	0.000734436	54	0.000473676	19
LAP4	S000001586	YKL103C	Vacuolar aminopeptidase yscI	80	V	0.000332613	41	0.000851694	204	0.00132978	81	0.00128212	17
GFA1	S000001587	YKL104C	Glutamine-fructose-6-phosphate amidotransferase	13	E	0.000223028	73	0.000508524	112	0.0018862	54	0.00170406	16
YKL105C	S000001588	YKL105C	Putative protein of unknown function	0	V	6.97832e-06	4	3.30518e-06	3	0	1
AAT1	S000001589	YKL106W	Mitochondrial aspartate aminotransferase	4	V			8.0352e-05	63	0.000802847	60	0.000119396	8
YKL107W	S000001590	YKL107W	Putative protein of unknown function	0	V	0	1	0	3	0	1
SLD2	S000001591	YKL108W	Single-stranded DNA origin-binding and annealing protein	24	E	8.57681e-05	32	3.89965e-05	27	0.000194641	20	9.77226e-06	4
HAP4	S000001592	YKL109W	Subunit of the Hap2p/3p/4p/5p CCAAT-binding complex	68	V	6.7918e-05	17	0.000114044	46	0.000486212	24	0.00125695	7
KTI12	S000001593	YKL110C	Protein that plays a role in modification of tRNA wobble nucleosides	9	V	0.000158916	12	0.000233896	73	1.9348e-05	14	7.88414e-05	8
ABF1	S000001595	YKL112W	DNA binding protein with possible chromatin-reorganizing activity	158	E	6.24583e-05	14	5.34661e-05	39	0.000351557	23	0	1
RAD27	S000001596	YKL113C	5' to 3' exonuclease	87	V	1.7158e-05	11	0.000825832	192	0.00122786	95	0.00206273	50
APN1	S000001597	YKL114C	Major apurinic/apyrimidinic endonuclease	83	V	5.68814e-05	13	0.000237795	76	0.000195698	39	0.000714049	19
PRR1	S000001599	YKL116C	Kinase that inhibits pheromone induced signalling downstream of MAPK	1	V	0.000350118	40	6.93708e-06	11	2.13768e-06	2
SBA1	S000001600	YKL117W	Co-chaperone that binds to and regulates Hsp90 family chaperones	19	V	0.00239767	117	0.000202209	55	0.00123381	34	0.00015375	8
VPH2	S000001602	YKL119C	Integral membrane protein required for V-ATPase function	4	V	3.72032e-05	8	0.000386952	45	1.13991e-05	7	2.60538e-05	5
OAC1	S000001603	YKL120W	Mitochondrial inner membrane transporter	1	V	2.29495e-05	14	6.83476e-05	34	2.02173e-05	8	0.000129855	5
SRP21	S000001605	YKL122C	Subunit of the signal recognition particle (SRP)	1	E	1.09512e-05	11	9.95512e-06	23	1.95736e-05	12	0.00013041	8
SSH4	S000001607	YKL124W	Specificity factor required for Rsp5p	5	V	4.24972e-06	5	3.17875e-05	28	5.55967e-06	5	4.85215e-05	3
RRN3	S000001608	YKL125W	Protein required for transcription of rDNA by RNA polymerase I	21	E	9.38902e-06	15	4.73249e-05	122	8.43357e-05	64	0.00062803	12
YPK1	S000001609	YKL126W	Ser/Thr protein kinase that regulates flippase activator Fpk1p	26	V	9.26617e-05	28	0.00102112	116	0.00208022	47	0.000545773	5
PGM1	S000001610	YKL127W	Phosphoglucomutase	6	V	2.30156e-05	12	7.98649e-05	53	0.000305967	34	0.000556726	9
PMU1	S000001611	YKL128C	Putative phosphomutase	3	V	7.02265e-06	4	3.355e-06	10	6.00005e-05	7	5.71493e-05	3
MYO3	S000001612	YKL129C	One of two type I myosins	19	V	0.000483751	45	0.000720652	90	0.000832894	37	0.000662096	16
SHE2	S000001613	YKL130C	RNA-binding protein that binds specific mRNAs and interacts with She3p	20	V	0.000651492	73	0.000379219	86	0.00284449	64	0.0170437	49
RMA1	S000001615	YKL132C	Putative dihydrofolate synthetase	1	V	3.45959e-05	3	4.99903e-05	14	5.24164e-05	7	0.000419362	2
OCT1	S000001617	YKL134C	Mitochondrial intermediate peptidase	8	V	9.46144e-08	2	3.54307e-06	8	2.51926e-05	3	0	1
APL2	S000001618	YKL135C	Beta-adaptin	5	V	9.40695e-05	34	0.000450664	70	0.000723214	34	0.00223048	14
CMC1	S000001620	YKL137W	Copper-binding protein of the mitochondrial intermembrane space	3	V	0	3	4.39988e-05	37	0.000382327	8	0	1
MRPL31	S000001621	YKL138C	Mitochondrial ribosomal protein of the large subunit	0	V	2.37814e-06	4	2.71209e-05	60	2.04236e-05	15	0	1
CTK1	S000001622	YKL139W	Catalytic (alpha) subunit of C-terminal domain kinase I (CTDK-I)	38	V	0.00024768	57	0.000147603	115	0.000505363	65	0.000893267	22
TGL1	S000001623	YKL140W	Steryl ester hydrolase	6	V	2.99939e-05	17	2.93635e-05	31	0.0001498	10	0.000191626	3
SDH3	S000001624	YKL141W	Cytochrome b subunit of succinate dehydrogenase	9	E	1.38476e-05	5	0.000124758	92	0.000194501	46	0.000242617	22
MRP8	S000001625	YKL142W	Protein of unknown function	1	V	0.000298537	31	0.000541264	208	0.00255568	100	0.00119398	16
LTV1	S000001626	YKL143W	Component of the GSE complex	9	V	6.39389e-06	15	0.000539991	384	0.00102528	233	0.00303433	125
RPC25	S000001627	YKL144C	RNA polymerase III subunit C25	2	E	2.38981e-05	21	0.000271175	317	0.000438773	145	0.00116425	45
RPT1	S000001628	YKL145W	ATPase of the 19S regulatory particle of the 26S proteasome	20	E	0.000688183	92	0.000317296	103	0.00162309	83	0.00223484	52
AVT3	S000001629	YKL146W	Vacuolar transporter	3	V	0.000157334	17	9.45321e-06	10	0	1	0	1
SDH1	S000001631	YKL148C	Flavoprotein subunit of succinate dehydrogenase	20	V	6.83563e-05	7	0.000432298	122	0.000967057	52	0.0006656	24
DBR1	S000001632	YKL149C	RNA lariat debranching enzyme	16	V	4.87124e-08	3	4.3187e-05	45	0.000110015	15	0	1
MCR1	S000001633	YKL150W	Mitochondrial NADH-cytochrome b5 reductase	6	V	2.77214e-05	13	0.000614319	224	0.00227404	81	0.00136772	12
YKL151C	S000001634	YKL151C	NADHX dehydratase	0	V	1.26788e-05	8	0.00018209	178	0.000385293	75	6.6096e-06	13
GPM1	S000001635	YKL152C	Tetrameric phosphoglycerate mutase	7	E	0.000335728	39	0.000137296	67	0.000450069	28	0.00251748	16
SRP102	S000001637	YKL154W	Signal recognition particle (SRP) receptor beta subunit	2	E	0.000107758	38	1.04172e-05	52	5.8671e-05	46	5.89849e-06	8
RSM22	S000001638	YKL155C	Mitochondrial ribosomal protein of the small subunit	2	V	1.84159e-05	33	1.13838e-05	40	0.000185788	32	0.000110466	27
RPS27A	S000001639	YKL156W	Protein component of the small (40S) ribosomal subunit	0	V	1.76473e-06	7	7.86266e-05	296	9.64737e-05	145	2.70729e-05	67
APE2	S000001640	YKL157W	Aminopeptidase yscII	3	V	5.17982e-05	16	0.000215934	37	0.000781134	7
RCN1	S000001642	YKL159C	Protein involved in calcineurin regulation during calcium signaling	6	V	7.18702e-05	10	5.19634e-05	23	0.000194016	9	1.56117e-05	2
ELF1	S000001643	YKL160W	Transcription elongation factor with a conserved zinc finger domain	6	V	3.679e-05	19	0.000132645	50	0.000201398	21	7.52374e-06	7
KDX1	S000001644	YKL161C	Protein kinase implicated in the Slt2p MAP kinase signaling pathway	3	V	5.51856e-05	23	3.95129e-05	49	2.56209e-05	12	6.10802e-05	9
PIR3	S000001646	YKL163W	O-glycosylated covalently-bound cell wall protein	6	V	0	2	1.73528e-05	17	1.25775e-06	2
PIR1	S000001647	YKL164C	O-glycosylated protein required for cell wall stability	13	V	4.01743e-05	5	2.26704e-05	20	0.000112655	8	2.21118e-05	3
MCD4	S000001648	YKL165C	Protein involved in GPI anchor synthesis	19	E	3.13604e-06	6	4.80825e-05	21	5.25378e-05	8	2.67795e-05	2
TPK3	S000001649	YKL166C	cAMP-dependent protein kinase catalytic subunit	29	V	0.00147114	104	0.000115257	65	0.000597295	41	0.000610366	13
MRP49	S000001650	YKL167C	Mitochondrial ribosomal protein of the large subunit	2	V	4.21171e-05	27	9.05527e-05	65	2.29454e-05	27	6.60101e-06	21
KKQ8	S000001651	YKL168C	Putative serine/threonine protein kinase with unknown cellular role	0	V	0.000249012	35	5.60699e-05	13	3.09722e-06	4	0	1
MRPL38	S000001653	YKL170W	Mitochondrial ribosomal protein of the large subunit	3	V	2.06619e-06	4	0.000199952	120	0.00125902	60	0.000592844	20
NNK1	S000001654	YKL171W	Protein kinase	1	V	0.00087195	63	3.37073e-05	24	9.82302e-06	8	3.16603e-05	2
EBP2	S000001655	YKL172W	Required for 25S rRNA maturation and 60S ribosomal subunit assembly	13	E	0.000167194	79	0.000503287	406	0.0013278	271	0.00152945	152
SNU114	S000001656	YKL173W	GTPase component of U5 snRNP involved in mRNA splicing via spliceosome	10	E	0.000427288	77	0.000190298	110	0.000578504	89	0.000989014	62
ZRT3	S000001658	YKL175W	Vacuolar membrane zinc transporter	2	V	5.82057e-06	4	9.82605e-06	10	0.000174793	4	0	1
LST4	S000001659	YKL176C	Protein possibly involved in a post-Golgi secretory pathway	3	V	0	1	4.99037e-05	54	7.5529e-05	16	0.000250213	4
STE3	S000001661	YKL178C	Receptor for a factor pheromone	76	V	1.51736e-05	8	0.000290642	61	0.00113194	35	0.00154575	15
COY1	S000001662	YKL179C	Golgi membrane protein with similarity to mammalian CASP	1	V	1.05523e-06	4	9.57041e-06	20	4.60016e-05	6	2.57173e-05	3
RPL17A	S000001663	YKL180W	Protein component of the large (60S) ribosomal subunit	2	E	0.000132783	111	0.000235363	267	0.000895437	185	0.000552812	141
PRS1	S000001664	YKL181W	5-phospho-ribosyl-1(alpha)-pyrophosphate synthetase	14	V	8.06195e-05	31	0.000423486	462	0.00136501	225	0.00136117	63
FAS1	S000001665	YKL182W	Beta subunit of fatty acid synthetase	37	E	9.87454e-05	35	0.000475538	74	0.000609526	24	0.000913795	6
LOT5	S000001666	YKL183W	Protein of unknown function	1	V	8.7543e-07	3	6.01973e-06	14	2.2267e-06	5	0	1
SPE1	S000001667	YKL184W	Ornithine decarboxylase	7	V	0.000347571	7	5.89452e-05	23	0.000484461	10	8.803e-05	6
ASH1	S000001668	YKL185W	Zinc-finger inhibitor of HO transcription	77	V	0.000188514	35	0.000243064	81	0.00192661	64	0.00107303	19
MTR2	S000001669	YKL186C	mRNA transport regulator	14	E	2.18403e-05	18	2.14969e-05	60	3.89438e-05	56	0.000150895	17
YKL187C	S000001670	YKL187C	Putative protein of unknown function	1	V	0	1	2.19896e-05	20	2.10807e-06	4
PXA2	S000001671	YKL188C	Subunit of a peroxisomal ATP-binding cassette transporter complex	9	V	1.43848e-05	4	1.30619e-05	13	2.09496e-05	7	0.000418037	6
HYM1	S000001672	YKL189W	Component of the RAM signaling network	8	E	6.39873e-06	10	7.56068e-05	41	0.000313045	29	0.000309688	9
CNB1	S000001673	YKL190W	Calcineurin B	16	V	0.000433274	12	0.0005858	107	0.000932687	48	0.00101065	12
DPH2	S000001674	YKL191W	Protein required for synthesis of diphthamide	5	V	1.94829e-05	14	0.000248382	279	0.000459928	130	0.000306685	21
ACP1	S000001675	YKL192C	Mitochondrial matrix acyl carrier protein	6	E	2.41479e-05	7	0.000484328	97	0.000729028	16	0.00111419	4
SDS22	S000001676	YKL193C	Regulatory subunit for Glc7p type-1 protein phosphatase (PP1)	10	E	0.000133954	30	0.00017174	91	0.000383216	18	5.01316e-05	7
MIA40	S000001678	YKL195W	Essential protein of the mitochondrial intermembrane space (IMS)	26	E	0.00111489	28	0.000193746	46	0.000756868	25	0.00294833	13
YKT6	S000001679	YKL196C	Vesicle membrane protein (v-SNARE) with acyltransferase activity	20	E	0.000412671	47	0.000139311	58	0.000659285	46	0.0011133	30
PEX1	S000001680	YKL197C	AAA-peroxin	12	V	5.62149e-05	12	0.000101853	39	6.47729e-05	12	3.07386e-08	4
PTK1	S000001681	YKL198C	Putative serine/threonine kinase that regulates spermine uptake	2	V	2.04981e-05	14	2.09703e-05	18	1.37937e-06	3
MNN4	S000001684	YKL201C	Putative positive regulator of mannosylphosphate transferase (Mnn6p)	24	V	1.1316e-05	5	8.6083e-05	17	0.000415946	6	0	1
TOR2	S000001686	YKL203C	PIK-related protein kinase and rapamycin target	79	E	0.000613954	83	0.000560765	141	0.000910183	55	0.00504175	32
EAP1	S000001687	YKL204W	eIF4E-associated protein	15	V	7.20013e-05	19	0.000120473	59	0.000180345	16	0.000197329	6
LOS1	S000001688	YKL205W	Nuclear pore protein	24	V	3.43951e-05	13	0.000216115	109	0.000623968	47	0.00151068	16
ADD66	S000001689	YKL206C	Protein involved in 20S proteasome assembly	1	V	2.13502e-05	13	1.46002e-05	22	1.49914e-05	15	4.73962e-06	8
AIM27	S000001690	YKL207W	Member of a transmembrane complex involved in ER protein folding	0	V	2.66332e-05	10	2.98449e-05	26	2.16508e-06	3	0.000419362	2
CBT1	S000001691	YKL208W	Protein involved in 5' end processing of mitochondrial COB	5	V	0	1	4.70961e-05	39	0.000162318	9
STE6	S000001692	YKL209C	Plasma membrane ATP-binding cassette (ABC) transporter	95	V	8.24326e-06	7	0.000231299	37	0.000895585	27	0.000931279	8
UBA1	S000001693	YKL210W	Ubiquitin activating enzyme (E1)	9	E	0.000737693	48	0.000203413	56	0.000577675	26	0.00061244	3
TRP3	S000001694	YKL211C	Indoleglycerol phosphate synthase and anthranilate synthase	28	V	4.60252e-05	27	0.000382943	119	0.000433711	39	0.00031149	14
SAC1	S000001695	YKL212W	PtdInsP phosphatase involved in hydrolysis of PtdIns[4]P	49	V	0.000126876	32	0.000691657	130	0.00148378	52	0.00395604	21
DOA1	S000001696	YKL213C	WD repeat protein required for ubiquitin-mediated protein degradation	18	V	0.00010536	23	0.000375123	149	0.00172857	80	0.00198894	24
YRA2	S000001697	YKL214C	Member of the REF (RNA and export factor binding proteins) family	0	V	1.78437e-05	19	2.29993e-05	31	5.71008e-05	14	4.88732e-05	9
OXP1	S000001698	YKL215C	5-oxoprolinase	2	V	4.12476e-05	7	2.62584e-05	19	9.80934e-05	14	0	1
URA1	S000001699	YKL216W	Dihydroorotate dehydrogenase	29	V	0.00013252	12	0.000416055	66	0.00041549	18	0.000881465	7
JEN1	S000001700	YKL217W	Monocarboxylate/proton symporter of the plasma membrane	20	V	6.72233e-06	2	7.17557e-05	40	0.000328647	7	0	1
SRY1	S000001701	YKL218C	3-hydroxyaspartate dehydratase	2	V	2.41765e-06	6	0.000166746	83	0.000686423	30	9.89658e-05	7
FRE2	S000001703	YKL220C	Ferric reductase and cupric reductase	16	V	4.88333e-08	2	7.26677e-06	25	1.93056e-06	9	0.000384009	4
PAU16	S000001707	YKL224C	Protein of unknown function	0	V			1.06668e-05	26	4.29962e-06	21	1.01828e-05	17
VPS1	S000001709	YKR001C	Dynamin-like GTPase required for vacuolar sorting	38	V	0.000272877	56	0.00069473	121	0.00324766	71	0.00447913	24
PAP1	S000001710	YKR002W	Poly(A) polymerase, one of three factors required for mRNA 3'-end pol	46	E	0.000102739	32	0.000115643	57	0.000195002	39	0.00128282	29
OSH6	S000001711	YKR003W	Member of an oxysterol-binding protein family with overlapping	0	V	4.14658e-05	17	2.0881e-05	8	2.30201e-05	6	0	2
YKR005C	S000001713	YKR005C	Putative protein of unknown function	0	V			0	1	0	1
MRPL13	S000001714	YKR006C	Mitochondrial ribosomal protein of the large subunit	4	V	9.7063e-05	36	0.000347154	51	0.000424039	32	6.60101e-06	21
MEH1	S000001715	YKR007W	Component of the EGO complex	7	V	7.36459e-05	20	0.000227632	50	0.000828202	19	0.00070953	8
RSC4	S000001716	YKR008W	Component of the RSC chromatin remodeling complex	5	E	7.52365e-05	36	6.04581e-05	49	9.90058e-05	30	0.000236133	18
FOX2	S000001717	YKR009C	Multifunctional enzyme of the fatty acid beta-oxidation pathway	8	V	0.00011571	20	0.000167751	62	0.000588617	20	0.000304383	7
TOF2	S000001718	YKR010C	Protein required for rDNA silencing and mitotic rDNA condensation	6	V	4.85367e-05	21	0.000116192	47	8.27371e-05	20	4.58569e-05	8
YKR011C	S000001719	YKR011C, TOS5	Putative protein of unknown function	1	V	8.3481e-07	4	0.000263987	98	4.95463e-05	16
PRY2	S000001721	YKR013W	Protein of unknown function	4	V	3.9473e-06	3	0.000381882	37	7.00279e-05	7	0.00126445	4
YPT52	S000001722	YKR014C	Rab family GTPase	5	V	0.000205745	31	8.3298e-05	41	0.000378245	17	0.000244698	8
YKR015C	S000001723	YKR015C	Putative protein of unknown function	1	V	5.82669e-06	2	1.24632e-05	15	0	1
FCJ1	S000001724	YKR016W	Mitochondrial inner membrane protein, ortholog of mammalian mitofilin	2	V	0.0068482	242	9.03528e-06	16	9.60416e-06	5
YKR017C	S000001725	YKR017C	Putative protein of unknown function	0	V	1.34125e-05	2	1.22526e-05	4	0	1
YKR018C	S000001726	YKR018C	Putative protein of unknown function	0	V	3.4242e-05	9	1.85591e-05	7	0	2	0	1
IRS4	S000001727	YKR019C	EH domain-containing protein that regulates PdtIns(4,5)P2 levels	6	V	0	2	0.000749383	53	7.21461e-05	5	0	1
VPS51	S000001728	YKR020W	Component of the GARP (Golgi-associated retrograde protein) complex	7	V	1.4409e-05	8	0.000277938	86	7.23967e-05	17	0.000105118	7
ALY1	S000001729	YKR021W	Alpha arrestin that controls intracellular sorting of permease Gap1p	2	V	5.83074e-05	16	2.34455e-05	14	4.43072e-06	4	1.4905e-05	3
NTR2	S000001730	YKR022C	Essential protein that forms a dimer with Ntr1p	3	E	0.000362846	32	0.000466743	30	0.000767471	21	0	4
YKR023W	S000001731	YKR023W	Putative protein of unknown function	0	V	8.65222e-05	5	7.59211e-06	7	7.5917e-06	3
DBP7	S000001732	YKR024C	Putative ATP-dependent RNA helicase of the DEAD-box family	3	V	1.33591e-05	27	0.000668091	354	0.00030849	227	0.000678245	124
RPC37	S000001733	YKR025W	RNA polymerase III subunit C37	5	E	5.48611e-05	27	0.000420019	313	0.00148895	160	0.000383996	34
GCN3	S000001734	YKR026C	Alpha subunit of the translation initiation factor eIF2B	33	V	0.000237449	46	0.000484946	337	0.00172159	127	0.00174569	24
BCH2	S000001735	YKR027W	Member of the ChAPs family of proteins	0	V	3.77622e-05	12	2.25513e-05	21	1.19141e-05	8	7.33387e-05	7
SAP190	S000001736	YKR028W	Protein that forms a complex with the Sit4p protein phosphatase	9	V	2.71283e-05	12	0.000106178	52	3.26494e-05	13	0.000122219	9
SET3	S000001737	YKR029C	Defining member of the SET3 histone deacetylase complex	11	V	1.59775e-05	17	0.000134903	96	0.000332883	57	0.000533802	27
GMH1	S000001738	YKR030W	Golgi membrane protein of unknown function	0	V	1.5281e-05	8	3.6472e-05	24	2.53803e-06	4	0	2
SPO14	S000001739	YKR031C	Phospholipase D	24	V	0.00025906	9	7.68932e-05	39	0.00118392	26	0.00110101	8
DAL80	S000001742	YKR034W	Negative regulator of genes in multiple nitrogen degradation pathways	36	V	6.10211e-05	26	0.000587874	86	0.000594125	31	0.00126946	11
CAF4	S000001744	YKR036C	WD40 repeat-containing protein associated with the CCR4-NOT complex	7	V	3.29216e-05	22	5.98719e-05	27	4.93888e-05	13	0.000131154	4
SPC34	S000001745	YKR037C	Essential subunit of the Dam1 complex (aka DASH complex)	5	E	3.83106e-05	25	5.90323e-05	69	0.000419327	65	0.000531004	23
KAE1	S000001746	YKR038C	Highly conserved ATPase of HSP70/DnaK family	8	E	5.35518e-05	9	4.61376e-05	23	0.000124861	8	0	4
GAP1	S000001747	YKR039W	General amino acid permease	118	V	8.9696e-05	18	0.000508414	98	0.000885386	39	0.00408239	18
UTH1	S000001750	YKR042W	Mitochondrial outer membrane and cell wall localized SUN family member	12	V	3.4327e-06	4	3.68633e-05	28	0.000153166	5	0	1
SHB17	S000001751	YKR043C	Sedoheptulose bisphosphatase involved in riboneogenesis	1	V	4.1258e-07	8	0.000115501	167	0.00019336	39	5.1538e-06	2
UIP5	S000001752	YKR044W	Protein of unknown function that interacts with Ulp1p	0	V	2.61775e-06	3	6.05732e-06	6	0	1
PET10	S000001754	YKR046C	Protein of unknown function that co-purifies with lipid particles	1	V	0.000531242	51	0.000117311	61	0.00013678	9
NAP1	S000001756	YKR048C	Protein that interacts with mitotic cyclin Clb2p	47	V	0.00155582	110	0.000384779	113	0.00141881	56	0.00357137	29
FMP46	S000001757	YKR049C	Putative redox protein containing a thioredoxin fold	1	V	5.29966e-06	4	0.000450156	128	0.000459822	42	2.53199e-06	8
TRK2	S000001758	YKR050W	Component of the Trk1p-Trk2p potassium transport system	63	V	2.47739e-07	3	8.21376e-06	21	0.000139224	16	7.23692e-05	6
MRS4	S000001760	YKR052C	Iron transporter that mediates Fe2 transport	19	V	3.75645e-06	4	0.000152125	32	0.000270429	12	0.000817646	6
YSR3	S000001761	YKR053C	Dihydrosphingosine 1-phosphate phosphatase	5	V	0	1	0.000475698	33	0.000179031	13	0	4
DYN1	S000001762	YKR054C	Cytoplasmic heavy chain dynein	11	V	2.94921e-05	24	0.000100185	76	0.000439806	55	0.00205287	29
RHO4	S000001763	YKR055W	Non-essential small GTPase of the Rho/Rac family of Ras-like proteins	17	V	5.08465e-06	9	8.77013e-05	57	0.000100272	28	0.00028879	17
TRM2	S000001764	YKR056W	tRNA methyltransferase	23	V	5.99625e-07	2	0.000362489	393	0.000752498	266	0.003649	163
RPS21A	S000001765	YKR057W	Protein component of the small (40S) ribosomal subunit	10	V	9.37201e-06	10	5.52041e-05	186	4.67411e-05	100	1.22611e-06	41
GLG1	S000001766	YKR058W	Self-glucosylating initiator of glycogen synthesis	4	V	1.95214e-06	5	1.84296e-05	36	2.59383e-05	10	7.19956e-08	5
TIF1	S000001767	YKR059W	Translation initiation factor eIF4A	18	V	0.000148407	47	0.000567653	280	0.00241579	117	0.000555901	38
UTP30	S000001768	YKR060W	Subunit of U3-containing 90S preribosome complex	0	V	1.3589e-05	33	6.45884e-05	313	8.25161e-05	203	3.59268e-05	85
KTR2	S000001769	YKR061W	Mannosyltransferase involved in N-linked protein glycosylation	6	V	0	1	2.37315e-05	17	5.79818e-06	2
TFA2	S000001770	YKR062W	TFIIE small subunit	4	E	2.32417e-05	17	5.58599e-05	62	4.31055e-05	51	0.00019161	14
LAS1	S000001771	YKR063C	Protein required for pre-rRNA processing at both ends of ITS2	2	E	9.07351e-06	4	4.44277e-06	6	4.84746e-07	2
OAF3	S000001772	YKR064W	Putative transcriptional repressor with Zn(2)-Cys(6) finger	2	V	4.63528e-05	5	0.000220031	87	0.00028518	26	0.000168478	7
PAM17	S000001773	YKR065C	Component of the TIM23 complex	4	V	1.41013e-05	7	5.99786e-05	28	0.000418252	15	0.000448613	11
CCP1	S000001774	YKR066C	Mitochondrial cytochrome-c peroxidase	13	V	3.34336e-06	9	6.0059e-06	14	7.94816e-05	9	0.000392862	4
GPT2	S000001775	YKR067W	Glycerol-3-phosphate/dihydroxyacetone phosphate sn-1 acyltransferase	1	V	3.15589e-05	7	0.000175432	71	0.00017293	17	0.000340305	4
BET3	S000001776	YKR068C	Subunit of the transport protein particle (TRAPP) complex	11	E	0.000616989	27	7.48526e-05	45	0.000193127	30	0.000106843	12
MET1	S000001777	YKR069W	S-adenosyl-L-methionine uroporphyrinogen III transmethylase	15	V	4.91455e-08	3	7.26864e-05	43	0.000134042	15	0.000605831	9
YKR070W	S000001778	YKR070W	Putative protein of unknown function	0	V	2.407e-06	4	2.30929e-06	6	0	2
DRE2	S000001779	YKR071C	Conserved component of the cytosolic Fe-S protein assembly machinery	8	E	5.29271e-05	17	2.43908e-05	23	0.000181021	10	0.000419362	2
SIS2	S000001780	YKR072C	Regulatory subunit of protein phosphatase 1 Ppz1p and subunit of PPCDC	19	V	0.000104954	18	0.000134266	57	0.00115825	36	0.0010546	10
ECM4	S000001784	YKR076W	Omega class glutathione transferase	2	V	3.25532e-06	3	0.00031224	178	0.000534224	63	7.23884e-05	11
MSA2	S000001785	YKR077W	Putative transcriptional activator	3	V	9.65214e-06	6	2.47548e-05	23	1.52607e-06	5	3.3839e-06	2
YKR078W	S000001786	YKR078W	Cytoplasmic protein of unknown function	0	V	4.60416e-05	5	2.36428e-05	6	4.67463e-05	4
TRZ1	S000001787	YKR079C	tRNA 3'-end processing endonuclease tRNase Z	3	E	0.000354208	14	4.94347e-05	258	0.000169205	125	0.000145985	14
MTD1	S000001788	YKR080W	NAD-dependent 5,10-methylenetetrahydrafolate dehydrogenase	3	V	1.60156e-05	10	2.41261e-05	29	3.25131e-05	19	0.000136805	13
RPF2	S000001789	YKR081C	Essential protein involved in rRNA maturation and ribosomal assembly	5	E	0.00274415	272	0.000675859	488	0.00101842	329	0.00237768	225
NUP133	S000001790	YKR082W	Subunit of the Nup84p subcomplex of the nuclear pore complex (NPC)	19	V	4.14001e-05	34	0.000366902	150	0.000364845	71	0.00319542	48
DAD2	S000001791	YKR083C	Essential subunit of the Dam1 complex (aka DASH complex)	2	E	0.000175473	25	0.000409041	76	0.000713562	56	2.35016e-08	10
HBS1	S000001792	YKR084C	GTPase with similarity to translation release factors	14	V	1.17581e-05	8	8.70663e-06	21	4.27225e-05	13	4.47998e-07	3
MRPL20	S000001793	YKR085C	Mitochondrial ribosomal protein of the large subunit	1	V	4.29211e-05	28	1.70516e-05	32	5.99565e-05	25	0.000209781	22
PRP16	S000001794	YKR086W	DEAH-box RNA helicase involved in second catalytic step of splicing	46	E	2.84627e-05	39	0.000489476	63	6.68196e-05	23	2.11152e-06	8
OMA1	S000001795	YKR087C	Metalloendopeptidase of the mitochondrial inner membrane	3	V	0	1	5.685e-05	25	0.000369081	5	0	1
TVP38	S000001796	YKR088C	Integral membrane protein localized to late Golgi vesicles	2	V	0.000173406	16	2.66524e-05	20	2.24923e-05	5
TGL4	S000001797	YKR089C	Multifunctional triacylglycerol lipase	4	V	1.33775e-06	3	3.4969e-05	22	0.000262536	10	0	1
PXL1	S000001798	YKR090W	LIM domain-containing protein that localizes to polarized growth sites	3	V	1.12266e-05	10	1.07571e-05	22	0.000217654	7	0	2
SRL3	S000001799	YKR091W	Cytoplasmic protein that	1	V	1.06203e-06	4	4.89052e-05	33	0.000415565	7	0	2
SRP40	S000001800	YKR092C	Nucleolar serine-rich protein	4	V	0.000161876	38	0.000379192	297	0.000646093	130	0.00180066	34
PTR2	S000001801	YKR093W	Integral membrane peptide transporter	24	V	9.48196e-07	5	3.63333e-05	25	0.000108232	9	2.14235e-05	2
RPL40B	S000001802	YKR094C	Ubiquitin and ribosomal L40B fusion protein	0	V	3.20813e-05	19	0.000251695	268	0.000927468	170	0.000624941	106
MLP1	S000001803	YKR095W	Myosin-like protein associated with the nuclear envelope	32	V	6.80229e-05	23	0.00030732	87	0.000295162	32	0.000175124	10
YKR096W	S000001804	YKR096W	Protein of unknown function that may interact with ribosomes	1	V	1.06823e-05	8	3.66776e-05	33	1.30656e-05	7	1.98175e-05	2
PCK1	S000001805	YKR097W	Phosphoenolpyruvate carboxykinase	28	V	2.73398e-05	21	0.000105453	67	0.000411377	47	0.000535161	15
UBP11	S000001806	YKR098C	Ubiquitin-specific protease	1	V	2.368e-07	4	3.75705e-06	8	7.12243e-07	2
BAS1	S000001807	YKR099W	Myb-related transcription factor	37	V	1.31763e-05	10	0.000153324	118	9.52238e-05	20	7.87898e-05	6
SKG1	S000001808	YKR100C	Transmembrane protein with a role in cell wall polymer composition	1	V	6.3838e-06	8	1.91681e-07	6	0	2
SIR1	S000001809	YKR101W	Protein involved in silencing at mating-type loci HML and HMR	88	V	9.76829e-05	15	0.000279909	77	0.000362461	48	0.000468879	17
FLO10	S000001810	YKR102W	Lectin-like protein with similarity to Flo1p	6	V			7.7259e-06	14	0	1	0	1
NFT1	S000001811	YKR103W	Putative transporter of the MRP subfamily	1	V	1.04178e-06	3	1.4846e-05	8	0	1
GEX2	S000001814	YKR106W	Protein of unconfirmed function	2	V	8.71041e-07	3	2.95332e-06	4	0	1
YAL065C	S000001817	YAL065C	Putative protein of unknown function	0	V	0	1	3.40054e-06	8	0.000104829	5	0	1
YFL068W	S000001826	YFL068W	Putative protein of unknown function	0	V	2.37563e-06	2	1.85402e-05	21	2.62428e-06	12	8.35525e-05	2
YFL067W	S000001827	YFL067W	Protein of unknown function	0	V	2.37563e-06	2	3.98311e-05	38	2.29028e-05	23	1.14386e-06	7
YFL066C	S000001828	YFL066C	Helicase-like protein encoded within the telomeric Y' element	0	V	6.14558e-07	3	5.79263e-05	39	0.00137487	22	2.62938e-07	9
YFL065C	S000001829	YFL065C	Putative protein of unknown function	0	V	0	1	8.80973e-05	39	0.00112708	22	3.62074e-07	12
YFL064C	S000001830	YFL064C	Putative protein of unknown function	0	V	2.37563e-06	2	5.38257e-05	39	0.00146058	30	1.32092e-06	15
COS4	S000001832	YFL062W	Protein of unknown function	0	V	0.000237444	27	2.67748e-05	14	0.000171418	6	2.35016e-07	5
SNO3	S000001834	YFL060C	Protein of unknown function	1	V	0	4	4.78607e-07	9	1.30842e-06	8	1.88013e-08	5
SNZ3	S000001835	YFL059W	Member of a stationary phase-induced gene family	3	V	6.27088e-05	12	2.78871e-05	16	0.000735983	10	1.15941e-07	7
THI5	S000001836	YFL058W	Protein involved in synthesis of hydroxymethylpyrimidine (HMP)	3	V	0	1	3.71057e-06	8	0.000364163	2	0	1
AAD16	S000001837	YFL057C	Putative aryl-alcohol dehydrogenase	0	V	0	1	8.56556e-05	12	0.0011522	8	4.70032e-07	4
AAD6	S000001838	YFL056C	Putative aryl-alcohol dehydrogenase	1	V	0	1	3.54257e-06	8	7.91655e-05	5	0	2
YFL054C	S000001840	YFL054C	Putative channel-like protein	1	V	1.54334e-05	11	9.87917e-05	11	5.55327e-06	5	7.62595e-05	2
DAK2	S000001841	YFL053W	Dihydroxyacetone kinase	6	V	1.79142e-07	2	2.57162e-05	20	7.69424e-07	7
YFL052W	S000001842	YFL052W, ROP1	Putative zinc cluster protein that contains a DNA binding domain	1	V	0	1	2.56406e-05	3	0	1
YFL051C	S000001843	YFL051C	Putative protein of unknown function	0	V			7.38002e-06	7	0	1
ALR2	S000001844	YFL050C	Probable Mg(2) transporter	7	V	7.9887e-06	9	1.31783e-05	12	0	2	0	1
SWP82	S000001845	YFL049W	Member of the SWI/SNF chromatin remodeling complex	3	V	1.23936e-06	12	0.000131361	24	0	11	7.37877e-08	11
EMP47	S000001846	YFL048C	Integral membrane component of ER-derived COPII-coated vesicles	10	V	0.000209904	37	7.59853e-05	43	0.000309131	16	0.000894804	7
RGD2	S000001847	YFL047W	GTPase-activating protein (RhoGAP) for Cdc42p and Rho5p	3	V	3.19626e-05	12	1.99052e-05	14	2.14521e-06	5	1.6812e-06	2
FMP32	S000001848	YFL046W	Putative protein of unknown function	0	V	5.89658e-06	3	2.01355e-07	3	7.21185e-06	2	0	1
SEC53	S000001849	YFL045C	Phosphomannomutase	27	E	5.81367e-05	24	0.000263714	98	0.000380449	25	0.000581386	6
OTU1	S000001850	YFL044C	Deubiquitylation enzyme that binds to the chaperone-ATPase Cdc48p	3	V	2.51666e-05	11	2.93759e-05	20	1.93647e-05	9	0	3
YFL042C	S000001852	YFL042C, YFL043C	Putative protein of unknown function	0	V	3.27061e-07	3	2.21013e-05	13	0	1	0	1
FET5	S000001853	YFL041W	Multicopper oxidase	3	V	5.0535e-05	20	6.66192e-06	15	5.75491e-05	7	0.000419362	2
YFL040W	S000001854	YFL040W	Putative transporter	0	V	2.94437e-06	5	0.000329144	7	0	1
ACT1	S000001855	YFL039C	Actin	151	E	0.00169042	130	0.00758031	456	0.010774	189	0.0265785	100
YPT1	S000001856	YFL038C	Rab family GTPase	130	E	0.000343852	41	0.000287676	87	0.00196357	60	0.00379104	29
TUB2	S000001857	YFL037W	Beta-tubulin	41	E	0.000411167	69	0.000942599	115	0.000719043	53	0.00186896	24
RPO41	S000001858	YFL036W	Mitochondrial RNA polymerase	27	V	3.26162e-05	14	4.70167e-05	29	0.000279376	16	0.000419362	3
MOB2	S000001859	YFL034C-B	Activator of Cbk1p kinase	11	V	6.77755e-05	10	4.77064e-05	24	5.56451e-05	14	0	3
YFL034W	S000001860	YFL034W	Putative integral membrane protein that interacts with Rpp0p	0	V	2.82742e-05	11	8.36689e-06	12	3.09001e-05	6	0	3
RIM15	S000001861	YFL033C	Protein kinase involved in cell proliferation in response to nutrients	30	V	0.000552912	30	9.3011e-05	56	0.000219699	31	0.000483703	14
HAC1	S000001863	YFL031W	Transcription factor that regulates the unfolded protein response	92	V	1.66589e-05	10	0.00142353	141	0.00211813	46	0.00201787	12
AGX1	S000001864	YFL030W	Alanine:glyoxylate aminotransferase (AGT)	7	V	5.69131e-06	3	0.0004598	117	0.000271583	23	9.6696e-05	3
CAK1	S000001865	YFL029C	Cyclin-dependent kinase-activating kinase required for cell cycling	24	E	1.01594e-05	11	0.000212292	87	0.000405857	30	0.000594725	12
CAF16	S000001866	YFL028C	Component of the CCR4-NOT transcriptional complex	2	V	5.84712e-06	8	4.70545e-05	41	6.2675e-05	9	2.61247e-05	2
GYP8	S000001867	YFL027C	GTPase-activating protein for yeast Rab family members	0	V			1.16161e-05	15	4.19236e-06	3
STE2	S000001868	YFL026W	Receptor for alpha-factor pheromone	144	V	0.00013139	18	0.000512165	86	0.00146603	45	0.00101302	17
BST1	S000001869	YFL025C	GPI inositol deacylase that regulates COPII vesicle formation	6	V	2.11764e-05	6	0.000205606	77	0.000313977	18	0.000500061	3
EPL1	S000001870	YFL024C	Subunit of NuA4, an essential histone H4/H2A acetyltransferase complex	3	E	4.3222e-05	29	2.29884e-05	38	0.000175199	31	0.000215326	17
BUD27	S000001871	YFL023W	Unconventional prefoldin protein involved in translation initiation	1	V	0.000202159	57	0.000355883	230	0.000867057	68	0.000400433	8
FRS2	S000001872	YFL022C	Alpha subunit of cytoplasmic phenylalanyl-tRNA synthetase	3	E	2.07613e-05	16	0.000114864	158	3.01056e-05	30	3.09622e-05	5
GAT1	S000001873	YFL021W	Transcriptional activator of genes involved in NCR	49	V	2.1572e-05	8	0.000264275	89	0.000309876	27	0.00025175	5
PAU5	S000001874	YFL020C	Member of the seripauperin multigene family	3	V			0.000425784	50	0.0012682	28	1.21593e-07	19
LPD1	S000001876	YFL018C	Dihydrolipoamide dehydrogenase	13	V	9.64403e-05	18	0.000399895	74	0.000582437	30	0.00151935	20
GNA1	S000001877	YFL017C	Glucosamine-6-phosphate acetyltransferase	5	E	5.05148e-06	11	9.02001e-06	23	6.50247e-05	11	0.000481263	4
MDJ1	S000001878	YFL016C	Co-chaperone that stimulates HSP70 protein Ssc1p ATPase activity	21	V	4.67778e-05	21	0.000120353	68	0.000367394	28	8.86334e-05	5
HSP12	S000001880	YFL014W	Plasma membrane protein involved in maintaining membranes	57	V	1.10145e-05	8	0.000315871	134	0.00033688	54	0.000859376	13
IES1	S000001881	YFL013C	Subunit of the INO80 chromatin remodeling complex	0	V	4.85493e-05	37	4.44241e-05	53	7.06209e-05	20	5.53431e-05	14
HXT10	S000001883	YFL011W	Putative hexose transporter	1	V	6.17916e-07	3	6.55344e-05	8	2.48974e-06	2
WWM1	S000001884	YFL010C	WW domain containing protein of unknown function	2	V	0.000317816	69	4.29254e-05	12	3.07635e-06	2
CDC4	S000001885	YFL009W	F-box protein required for G1/S and G2/M transition	112	E	0.000125055	24	0.000285551	78	0.00132137	46	0.00193585	21
SMC1	S000001886	YFL008W	Subunit of the multiprotein cohesin complex	34	E	0.000114706	44	0.000127154	82	0.000335437	44	0.000862563	16
BLM10	S000001887	YFL007W	Proteasome activator subunit	10	V	2.66635e-05	32	6.5232e-05	66	0.000218647	53	0.000580012	38
SEC4	S000001889	YFL005W	Rab family GTPase essential for exocytic secretion and autophagy	109	E	0.000203926	38	0.00022323	81	0.000867907	54	0.00113754	27
VTC2	S000001890	YFL004W	Subunit of the vacuolar transporter chaperone (VTC) complex	1	V	0.000179806	6	3.55637e-05	29	3.9893e-06	3	0.000173394	3
MSH4	S000001891	YFL003C	Protein involved in meiotic recombination	36	V	0.000101547	10	0.000199874	35	0.000151484	16	0.000403246	9
SPB4	S000001894	YFL002C	Putative ATP-dependent RNA helicase	6	E	0.00724522	364	0.000351236	280	0.000782859	156	6.17934e-06	51
DEG1	S000001895	YFL001W	tRNA:pseudouridine synthase	13	V	2.33491e-06	7	0.000306323	179	0.000121383	32	0.000442281	4
LOC1	S000001897	YFR001W	Nuclear protein involved in asymmetric localization of ASH1 mRNA	5	V	0.000158962	69	0.000356691	287	0.000386435	137	0.000343352	56
NIC96	S000001898	YFR002W	Component of the nuclear pore complex	24	E	7.01067e-05	37	4.93353e-05	75	0.000185186	63	0.000971768	39
YPI1	S000001899	YFR003C	Inhibitor of the type I protein phosphatase Glc7p	4	E	3.63901e-05	9	4.47614e-05	49	7.0159e-05	7	6.07429e-06	4
RPN11	S000001900	YFR004W	Metalloprotease subunit of the proteasome regulatory particle lid	22	E	0.0291155	772	0.000312389	97	0.000659076	64	0.000865796	48
SAD1	S000001901	YFR005C	Conserved zinc-finger domain protein involved in pre-mRNA splicing	14	E	1.82002e-06	4	4.35045e-05	28	4.41523e-06	7	0	1
YFR006W	S000001902	YFR006W	Putative X-Pro aminopeptidase	1	V	0	4	3.37998e-05	10	2.07126e-06	5	0	1
FAR7	S000001904	YFR008W	Protein involved in recovery from arrest in response to pheromone	2	V	5.29024e-05	12	3.15229e-05	18	3.87728e-05	9	0.000497661	4
GCN20	S000001905	YFR009W	Positive regulator of the Gcn2p kinase activity	4	V	0.000102615	34	0.000174195	90	0.000267328	31	0.00095493	10
UBP6	S000001906	YFR010W	Ubiquitin-specific protease in the base subcomplex of the proteasome	21	V	0.000249447	54	0.000411054	136	0.000750971	72	0.00123238	36
AIM13	S000001907	YFR011C	Mitochondrial protein peripheral to the inner membrane	1	V	2.30249e-05	9	3.70843e-05	29	1.5201e-05	2
IOC3	S000001909	YFR013W	Subunit of the Isw1a complex	6	V	1.25785e-05	21	3.39086e-05	33	3.63273e-05	14	1.44004e-05	6
CMK1	S000001910	YFR014C	Calmodulin-dependent protein kinase	8	V	0.00376326	185	0.00010131	74	0.000160994	12	0	1
GSY1	S000001911	YFR015C	Glycogen synthase with similarity to Gsy2p	6	V	0.00025757	21	6.07099e-05	62	0.000137721	29	0.000304228	16
YFR016C	S000001912	YFR016C	Putative protein of unknown function	1	V	2.42946e-06	7	1.28655e-05	12	7.84131e-07	3	0	1
IGD1	S000001913	YFR017C	Cytoplasmic protein that inhibits Gdb1p glycogen debranching activity	3	V	4.08533e-05	14	0.00032305	152	0.00104025	54	0.000313518	9
FAB1	S000001915	YFR019W	1-phosphatidylinositol-3-phosphate 5-kinase	31	V	2.06468e-05	18	0.000118765	72	0.000297737	22	0.000530439	10
ATG18	S000001917	YFR021W	Phosphoinositide binding protein required for autophagy and CVT	18	V	0.000293659	30	0.000208967	50	0.00109131	36	0.000465807	10
ROG3	S000001918	YFR022W	Protein that binds the ubiquitin ligase Rsp5p via its 2 PY motifs	1	V	1.69062e-05	9	4.03916e-06	8	1.52233e-05	4	2.52463e-06	2
PES4	S000001919	YFR023W	Poly(A) binding protein	0	V	0	1	3.80149e-06	10	2.52816e-07	2
HIS2	S000001921	YFR025C	Histidinolphosphatase	28	V	4.23924e-05	4	1.26628e-06	8	2.25377e-06	3	0	2
ECO1	S000001923	YFR027W	Acetyltransferase required for sister chromatid cohesion	43	E	7.96746e-05	21	8.87215e-05	47	0.000119784	27	0.000396467	14
CDC14	S000001924	YFR028C	Protein phosphatase required for mitotic exit	192	E	0.00274266	167	0.000858349	163	0.00224705	91	0.00440156	38
PTR3	S000001925	YFR029W	Component of the SPS plasma membrane amino acid sensor system	26	E	2.77361e-05	12	8.3113e-05	39	0.000354001	19	0.000103426	4
MET10	S000001926	YFR030W	Subunit alpha of assimilatory sulfite reductase	15	V	2.71043e-05	16	0.000247016	70	0.000277301	24	2.4144e-05	7
SMC2	S000001927	YFR031C	Subunit of the condensin complex	23	E	0.000130784	24	0.000158323	62	0.000393287	34	0.000121357	6
RRT5	S000001928	YFR032C	Putative protein of unknown function	2	V	1.73517e-07	2	2.36109e-07	3	0	1
QCR6	S000001929	YFR033C	Subunit 6 of the ubiquinol cytochrome-c reductase complex	11	V	0.000170145	12	0.00019045	81	0.000536193	49	0.000316472	28
PHO4	S000001930	YFR034C	Basic helix-loop-helix (bHLH) transcription factor of the myc-family	138	V	0.00151529	157	0.00039642	86	0.0010783	46	0.00259913	19
YFR035C	S000001931	YFR035C	Putative protein of unknown function	0	V	6.25916e-07	2	3.37957e-07	3	1.91134e-06	2
CDC26	S000001932	YFR036W	Subunit of the Anaphase-Promoting Complex/Cyclosome (APC/C)	9	V	3.82009e-05	17	7.94171e-05	49	4.07119e-05	33	2.41844e-05	17
RSC8	S000001933	YFR037C	Component of the RSC chromatin remodeling complex	4	E	0.000317405	68	0.000205272	85	0.000306633	45	0.000618136	27
IRC5	S000001934	YFR038W	Putative ATPase containing the DEAD/H helicase-related sequence motif	2	V	6.25157e-06	8	2.429e-06	16	1.70083e-07	2
SAP155	S000001936	YFR040W	Protein that forms a complex with the Sit4p protein phosphatase	13	V	7.86973e-05	22	0.000180734	69	0.000217838	22	0.000253332	9
ERJ5	S000001937	YFR041C	Type I membrane protein with a J domain involved in protein folding	1	V	8.36683e-07	2	3.80002e-05	28	6.47736e-05	21	0	2
KEG1	S000001938	YFR042W	Integral membrane protein of the ER	1	E	5.9205e-07	4	5.30345e-05	12	6.1039e-06	5	0	1
IRC6	S000001939	YFR043C	Putative protein of unknown function	0	V	3.44032e-05	7	2.2689e-05	10	1.77409e-05	4
DUG1	S000001940	YFR044C	Cys-Gly metallo-di-peptidase	3	V	3.26005e-05	8	5.63385e-05	19	0.000357457	10	0.000960596	4
YFR045W	S000001941	YFR045W	Putative mitochondrial transport protein	1	V			1.04493e-05	11	2.04884e-05	2
CNN1	S000001942	YFR046C	Kinetochore protein of unknown function	0	V	2.08617e-06	6	4.57551e-06	27	3.16619e-05	24	4.31538e-05	5
BNA6	S000001943	YFR047C	Quinolinate phosphoribosyl transferase	3	V	1.17792e-05	6	0.000136829	53	0.000108786	12	0	3
RMD8	S000001944	YFR048W	Cytosolic protein required for sporulation	0	V	1.17888e-06	5	5.37575e-07	8	1.48537e-06	2
YMR31	S000001945	YFR049W	Mitochondrial ribosomal protein of the small subunit	6	V	1.91931e-05	9	4.22808e-05	45	2.53144e-05	8	0.000147941	4
PRE4	S000001946	YFR050C	Beta 7 subunit of the 20S proteasome	13	E	4.13605e-05	31	9.61679e-05	76	0.000456184	62	0.00229882	47
RET2	S000001947	YFR051C	Delta subunit of the coatomer complex (COPI)	4	E	0.000230141	35	0.000305365	80	0.000357005	30	0.00159693	15
RPN12	S000001948	YFR052W	Subunit of the 19S regulatory particle of the 26S proteasome lid	14	E	0.000188939	59	0.000204663	89	0.000776132	65	0.000836405	45
HXK1	S000001949	YFR053C	Hexokinase isoenzyme 1	45	V	8.53451e-05	16	0.000517977	170	0.00144237	70	0.000748004	22
IRC7	S000001952	YFR055W	Beta-lyase involved in the production of thiols	3	V	0	1	5.71065e-05	39	0.0003552	31	0.000152849	7
MEI4	S000001954	YER044C-A	Meiosis-specific protein involved in forming DSBs during recombination	14	V	4.76399e-05	5	1.65798e-05	38	7.09374e-06	9	3.09172e-07	5
AUA1	S000001955	YFL010W-A	Protein required for the negative regulation by ammonia of Gap1p	1	V	0	1	4.11431e-06	7	0	1
CWP2	S000001956	YKL096W-A	Covalently linked cell wall mannoprotein	25	V	2.79013e-06	5	0.000161009	30	7.76426e-05	4	0	1
SAE3	S000001957	YHR079C-A	Meiosis-specific protein involved in meiotic recombination	8	V	1.03863e-06	4	2.84708e-07	8	4.83842e-06	6	3.94515e-06	3
VMA10	S000002100	YHR039C-A	Subunit G of the V1 peripheral membrane domain of V-ATPase	10	V	7.85743e-05	23	4.66948e-05	34	0.000151492	23	0.000200068	16
SFT1	S000002101	YKL006C-A	Intra-Golgi v-SNARE	7	E	8.83843e-05	16	4.01783e-05	29	9.95107e-06	20	2.50146e-05	11
PMP2	S000002103	YEL017C-A	Proteolipid associated with plasma membrane H()-ATPase (Pma1p)	3	V	3.21015e-05	28	7.02033e-06	7	0	1
RPL2A	S000002104	YFR031C-A	Protein component of the large (60S) ribosomal subunit	0	V	0.000159851	131	0.000508914	273	0.000631439	180	0.000800045	129
SBH2	S000002127	YER019C-A	Ssh1p-Sss1p-Sbh2p complex component	2	V	6.04566e-05	10	9.84683e-05	57	0.000468882	36	0.00260504	13
SBH1	S000002128	YER087C-A, YER087C-B	Beta subunit of the Sec61p ER translocation complex	9	V	0.000200011	29	0.000118486	51	6.79116e-08	6	0.00163831	18
ERP1	S000002129	YAR002C-A	Protein that forms a heterotrimeric complex with Erp2p	0	V	0.000200586	50	0.000121456	71	0.00052334	28	0.000838003	11
PTC6	S000002133	YCR079W	Mitochondrial type 2C protein phosphatase (PP2C)	8	V	0.000111131	25	4.91859e-05	34	3.65224e-05	6	0	1
FUN19	S000002134	YAL034C	Non-essential protein of unknown function	2	V	1.16132e-05	11	9.16335e-05	42	2.18211e-05	10	2.29044e-05	2
RPL34A	S000002135	YER056C-A	Protein component of the large (60S) ribosomal subunit	0	V	2.36528e-05	15	0.000109024	201	0.000410689	146	0.00252028	118
TDA8	S000002140	YAL064C-A	Putative protein of unknown function	0	V	2.37563e-06	2	2.62185e-06	3	1.34488e-05	2
YAL064W-B	S000002141	YAL064W-B	Fungal-specific protein of unknown function	0	V	2.37563e-06	2	0.000325149	6	0	2
PAU8	S000002142	YAL068C	Protein of unknown function	0	V	6.76329e-07	2	6.12737e-05	23	0	18	0	15
YBL005W-A	S000002146	YBL005W-A	Retrotransposon TYA Gag gene co-transcribed with TYB Pol	0	V	8.84528e-06	4	6.96279e-05	29	7.34942e-05	14	0.000377023	5
YBL005W-B	S000002147	YBL005W-B	Retrotransposon TYA Gag and TYB Pol genes	0	V	9.66258e-08	3	6.86195e-05	25	2.44651e-06	9	0	3
YBL100W-A	S000002148	TY2A_B, YBL100W-A, YBL101W-A	Retrotransposon TYA Gag gene co-transcribed with TYB Pol	0	V	0	2	0.00015056	15	0	1	0	1
YBL100W-B	S000002149	TY2B_B, YBL101W-B, YBL100W-B	Retrotransposon TYA Gag and TYB Pol genes	0	V			4.29722e-07	21	1.06634e-07	14	0.000129322	9
YBL111C	S000002151	YBL111C	Helicase-like protein encoded within the telomeric Y' element	0	V	3.54486e-06	5	0.000741874	46	0.00227233	28	0.000403966	13
YBL112C	S000002152	YBL112C	Putative protein of unknown function	0	V	2.37563e-06	2	6.50596e-05	35	7.95643e-05	21	3.19883e-08	5
YBL113C	S000002153	YBL113C	Helicase-like protein encoded within the telomeric Y' element	0	V	2.37563e-06	2	0.000107227	37	0.000203442	20	0.000819547	11
YBR012W-A	S000002154	YBR012W-A	Retrotransposon TYA Gag gene co-transcribed with TYB Pol	0	V	2.74013e-06	3	2.71377e-05	18	0	7	0	5
YBR012W-B	S000002155	YBR012W-B	Retrotransposon TYA Gag and TYB Pol genes	0	V	1.52904e-07	2	8.50122e-05	35	0.000507313	22	0.0108526	17
RPL19A	S000002156	YBR084C-A	Protein component of the large (60S) ribosomal subunit	3	V	2.48899e-05	17	0.000504158	269	0.000275213	153	6.5349e-05	78
NHP6B	S000002157	YBR089C-A	High-mobility group protein that binds to and remodels nucleosomes	27	V	0.000140239	52	0.000263212	104	0.000120485	38	0.000203589	17
YSY6	S000002158	YBR162W-A	Protein whose expression suppresses an E. coli secretory mutant	0	V	6.45847e-06	4	5.32827e-05	16	0	1
RMD1	S000002159	YDL001W	Cytoplasmic protein required for sporulation	0	V	2.36642e-05	8	1.46576e-05	8	8.88755e-07	2
NHP10	S000002160	YDL002C	Protein related to mammalian high mobility group proteins	5	V	0.000100318	43	0.00055837	166	0.000254563	42	0.00012988	18
MCD1	S000002161	YDL003W	Essential subunit of the cohesin complex	87	E	9.94034e-05	33	0.000411596	118	0.00159412	76	0.00190814	24
ATP16	S000002162	YDL004W	Delta subunit of the central stalk of mitochondrial F1F0 ATP synthase	2	E	3.03794e-05	8	7.52675e-05	75	0.000159673	42	0.000105289	17
MED2	S000002163	YDL005C	Subunit of the RNA polymerase II mediator complex	13	V	7.7939e-05	38	0.000254493	75	0.000231533	43	0	23
PTC1	S000002164	YDL006W	Type 2C protein phosphatase (PP2C)	37	V	0.000122789	38	0.000252761	85	0.000697943	40	0.000431208	10
RPT2	S000002165	YDL007W	ATPase of the 19S regulatory particle of the 26S proteasome	5	E	0.000250905	48	8.80853e-05	65	0.000248667	52	0.000543399	48
APC11	S000002166	YDL008W	Catalytic core subunit of the Anaphase-Promoting Complex/Cyclosome (A	8	E	7.66202e-05	19	6.60368e-05	46	3.13958e-05	29	0	14
GRX6	S000002168	YDL010W	Cis-golgi monothiol glutaredoxin that binds an iron-sulfur cluster	5	V	1.11443e-07	5	0.000171257	18	0.000387151	6	0	1
YDL012C	S000002170	YDL012C	Tail-anchored plasma membrane protein containing a CYSTM module	2	V	7.53229e-05	10	0.00055507	21	0	1
SLX5	S000002171	YDL013W	Subunit of the Slx5-Slx8 SUMO-targeted ubiquitin ligase complex	25	V	0.000816585	52	0.000379663	126	0.00100607	75	0.00257531	29
NOP1	S000002172	YDL014W	Nucleolar protein	45	E	0.00134705	195	0.00178477	580	0.00427572	336	0.0033662	178
TSC13	S000002173	YDL015C	Enoyl reductase involved in very long chain fatty acid elongation	5	E	0.000262749	51	0.000131435	48	0.000120156	11	0.000428933	5
CDC7	S000002175	YDL017W	DDK (Dbf4-dependent kinase) catalytic subunit	159	E	0.00100139	48	0.00116597	124	0.00270771	71	0.000235513	19
ERP3	S000002176	YDL018C	Protein with similarity to Emp24p and Erv25p	2	V	7.87163e-07	5	2.59146e-05	25	0.000230493	12	0.000455535	5
OSH2	S000002177	YDL019C	Member of an oxysterol-binding protein family	5	V	4.9245e-05	23	5.63033e-05	43	0.000129322	16	3.33734e-05	3
RPN4	S000002178	YDL020C	Transcription factor that stimulates expression of proteasome genes	40	V	5.6735e-05	17	0.00121517	176	0.00159117	81	0.00142755	23
GPM2	S000002179	YDL021W	Homolog of Gpm1p phosphoglycerate mutase	2	V	2.50509e-05	4	0.000258984	123	0.000207218	34	0.000529535	5
GPD1	S000002180	YDL022W	NAD-dependent glycerol-3-phosphate dehydrogenase	90	V	2.20122e-05	10	0.000388951	136	0.00102242	40	0.00283505	14
DIA3	S000002182	YDL024C	Protein of unknown function	1	V	0	1	0.000285029	35	6.48974e-05	5	0.000143359	2
RTK1	S000002183	YDL025C	Putative protein kinase	0	V	0.00117381	51	6.53891e-05	29	0.000371004	5	0.000419362	3
YDL027C	S000002185	YDL027C	Putative protein of unknown function	0	V	1.19784e-06	4	3.91254e-05	60	3.75714e-05	4
MPS1	S000002186	YDL028C	Dual-specificity kinase	43	E	0.000899556	65	0.000315217	98	0.000745504	78	0.000989084	33
ARP2	S000002187	YDL029W	Essential component of the Arp2/3 complex	85	E	0.000457223	76	0.000261558	103	0.000375614	40	0.00056294	19
PRP9	S000002188	YDL030W	Subunit of the SF3a splicing factor complex	13	E	0.000198788	68	9.65415e-05	78	0.000553147	61	0.000719379	42
DBP10	S000002189	YDL031W	Putative ATP-dependent RNA helicase of the DEAD-box protein family	4	E	4.44487e-05	60	0.000221696	363	0.00024635	231	0.00013419	132
SLM3	S000002191	YDL033C	tRNA-specific 2-thiouridylase	3	V	8.36254e-07	3	0.000154684	60	0.000651721	17	0.000838537	3
GPR1	S000002193	YDL035C	Plasma membrane G protein coupled receptor (GPCR)	47	V	2.63677e-05	8	5.76811e-05	30	0.0001982	20	0.00011169	7
PUS9	S000002194	YDL036C	Mitochondrial tRNA:pseudouridine synthase	1	V	0	3	2.60468e-05	13	0.000118991	3	0	2
BSC1	S000002195	YDL037C	Protein of unconfirmed function	0	V	7.64519e-06	4	8.83816e-05	13	0.000365547	9	0	1
PRM7	S000002197	YDL039C	Pheromone-regulated protein	1	V	7.85965e-06	6	1.65595e-05	11	0	1	0	1
NAT1	S000002198	YDL040C	Subunit of the N-terminal acetyltransferase NatA	19	V	7.09674e-05	29	9.2293e-05	56	0.000733771	36	0.000244347	6
SIR2	S000002200	YDL042C	Member of the Sir2 family of NAD()-dependent protein deacetylases	400	V	0.000549324	63	0.00227262	260	0.00442882	120	0.00449152	39
PRP11	S000002201	YDL043C	Subunit of the SF3a splicing factor complex	13	E	0.000297297	69	0.000109302	86	0.000269749	51	0.000418493	30
MTF2	S000002202	YDL044C	Mitochondrial protein that interacts with mitochondrial RNA polymerase	10	V	9.55557e-06	9	2.67026e-05	24	0.000133899	12	0.000233329	4
FAD1	S000002203	YDL045C	Flavin adenine dinucleotide (FAD) synthetase	5	E	1.07256e-05	2	8.7411e-05	13	2.93293e-05	8	0.000419362	2
NPC2	S000002204	YDL046W	Functional homolog of human NPC2/He1	3	V	0	1	1.53046e-05	26	0	2
SIT4	S000002205	YDL047W	Type 2A-related serine-threonine phosphatase	94	V	0.000615177	70	0.000630466	151	0.00460138	88	0.00957852	40
STP4	S000002206	YDL048C	Protein containing a Kruppel-type zinc-finger domain	0	V	1.0104e-06	3	5.69159e-05	18	3.46181e-06	5
KNH1	S000002207	YDL049C	Protein with similarity to Kre9p	3	V	0	1	0.000379861	21	0	1
LHP1	S000002209	YDL051W	RNA binding protein required for maturation of tRNA and U6 snRNA	24	V	9.41313e-05	36	0.000494137	469	0.00218436	276	0.00376082	118
SLC1	S000002210	YDL052C	1-acyl-sn-glycerol-3-phosphate acyltransferase	24	V	3.81922e-05	21	0.000238096	65	0.000617462	24	0.000759286	5
PBP4	S000002211	YDL053C	Pbp1p binding protein	4	V	0.000168786	31	0.000130996	50	9.24794e-05	14	0	2
MCH1	S000002212	YDL054C	Protein with similarity to mammalian monocarboxylate permeases	4	V	0.000400198	17	0.000113415	46	6.66242e-05	7
PSA1	S000002213	YDL055C	GDP-mannose pyrophosphorylase (mannose-1-phosphate guanyltransferase)	11	E	0.000685966	91	0.000328565	63	0.000582926	19	0.00215375	6
MBP1	S000002214	YDL056W	Transcription factor involved in cell cycle progression from G1 to S	69	V	2.9874e-05	15	0.000168182	86	0.000131663	25	0.000282529	6
YDL057W	S000002215	YDL057W	Putative protein of unknown function	1	V	1.73168e-07	3	5.81053e-06	11	0	1
USO1	S000002216	YDL058W	Protein involved in the ER to Golgi transport step of secretion	23	E	4.98244e-06	10	5.6263e-05	51	0.000473222	31	0.000374044	12
RAD59	S000002217	YDL059C	Protein involved in the repair of double-strand breaks in DNA	53	V	3.33579e-05	35	0.00010447	70	0.00014669	36	2.19611e-05	14
TSR1	S000002218	YDL060W	Protein required for processing of 20S pre-rRNA in the cytoplasm	9	E	4.56535e-05	58	0.000307929	418	0.00095702	283	0.00314625	150
RPS29B	S000002219	YDL061C	Protein component of the small (40S) ribosomal subunit	1	V	1.12052e-05	9	5.83925e-05	185	2.04757e-05	125	1.45584e-05	88
YDL063C	S000002221	YDL063C	Protein required for biogenesis of the large ribosomal subunit	2	V	7.36627e-08	4	0.000195338	377	0.000282703	257	0.000136789	154
UBC9	S000002222	YDL064W	SUMO-conjugating enzyme involved in the Smt3p conjugation pathway	67	E	0.000189586	33	0.000236052	83	0.00040512	45	0.000209231	16
PEX19	S000002223	YDL065C	Chaperone and import receptor for newly-synthesized class I PMPs	22	V	0.000159891	35	0.000176584	35	0.00078337	23	0.00270814	14
IDP1	S000002224	YDL066W	Mitochondrial NADP-specific isocitrate dehydrogenase	7	V	2.19331e-05	16	0.000126945	78	0.000397691	28	0.00111663	8
COX9	S000002225	YDL067C	Subunit VIIa of cytochrome c oxidase	5	V	1.18832e-06	6	2.08627e-05	45	1.83969e-05	29	6.67328e-06	18
CBS1	S000002227	YDL069C	Mitochondrial translational activator of the COB mRNA	12	V	8.6939e-07	3	2.31418e-05	28	1.32251e-06	2
BDF2	S000002228	YDL070W	Protein involved in transcription initiation at TATA promoters	5	V	0.000105435	34	0.000124705	69	3.41736e-06	8	0	2
YET3	S000002230	YDL072C	Protein of unknown function	4	V	2.54794e-05	13	0.00023839	110	0.000174953	21	0.000419362	2
YDL073W	S000002231	YDL073W	Putative protein of unknown function	1	V	1.05203e-06	4	1.74748e-06	10	2.22694e-06	2	0	1
BRE1	S000002232	YDL074C	E3 ubiquitin ligase	39	V	0.000431193	27	0.00082881	168	0.00133354	80	0.00672137	36
RPL31A	S000002233	YDL075W	Protein component of the large (60S) ribosomal subunit	2	V	6.96881e-05	88	7.37001e-05	194	0.000534781	140	0.000399369	109
RXT3	S000002234	YDL076C	Subunit of the RPD3L complex	1	V	7.34768e-05	21	8.24513e-05	42	0.000120746	27	0.000183529	14
VAM6	S000002235	YDL077C	Vacuolar protein involved in vacuolar membrane fusion tethering	15	V	1.7338e-05	28	7.71733e-05	59	9.58206e-05	22	0.000593379	13
MDH3	S000002236	YDL078C	Peroxisomal malate dehydrogenase	9	V	6.02592e-05	20	0.000152488	67	0.000442281	36	0.000635141	14
MRK1	S000002237	YDL079C	Glycogen synthase kinase 3 (GSK-3) homolog	3	V	4.18628e-05	12	3.54041e-05	19	1.00964e-05	7	0	1
THI3	S000002238	YDL080C	Probable alpha-ketoisocaproate decarboxylase	17	V	0.000385312	7	0.000187437	55	0.000238516	28	0.000517023	4
RPP1A	S000002239	YDL081C	Ribosomal stalk protein P1 alpha	5	V	3.6413e-05	21	0.000100747	226	0.000223662	161	4.8365e-05	88
RPL13A	S000002240	YDL082W	Protein component of the large (60S) ribosomal subunit	1	V	5.80233e-05	100	0.000252458	335	0.000555608	216	0.00349666	148
RPS16B	S000002241	YDL083C	Protein component of the small (40S) ribosomal subunit	1	V	7.23848e-05	94	0.000184615	290	0.000217442	177	0.000462087	131
SUB2	S000002242	YDL084W	Component of the TREX complex required for nuclear mRNA export	24	E	0.000259637	36	0.000905118	198	0.00188816	60	0.000558779	22
NDE2	S000002243	YDL085W	Mitochondrial external NADH dehydrogenase	6	V	0.00012973	12	0.000791623	97	0.000338188	29	0.000141219	5
LUC7	S000002245	YDL087C	Essential protein associated with the U1 snRNP complex	3	E	3.4617e-05	34	2.73851e-05	39	9.89086e-05	30	6.35851e-06	23
ASM4	S000002246	YDL088C	Nuclear pore complex subunit	2	V	4.10554e-05	26	0.000232505	90	0.000235164	63	0.000756365	34
NUR1	S000002247	YDL089W	Protein of unknown function	1	V	2.36868e-05	12	1.76125e-05	23	4.81074e-05	7	0	3
RAM1	S000002248	YDL090C	Beta subunit of the CAAX farnesyltransferase (FTase)	20	V	4.26153e-06	4	4.61101e-05	28	0.000157567	10	0.000279055	4
UBX3	S000002249	YDL091C	UBX (ubiquitin regulatory X) domain-containing protein	0	V	2.01828e-06	5	2.01521e-05	19	2.55951e-06	2
SRP14	S000002250	YDL092W	Signal recognition particle (SRP) subunit	5	E	7.31869e-05	19	2.0423e-05	25	5.12839e-05	13	4.71926e-06	7
PMT5	S000002251	YDL093W	Protein O-mannosyltransferase	1	V	5.02261e-06	5	2.45731e-06	10	1.11666e-05	4
PMT1	S000002253	YDL095W	Protein O-mannosyltransferase	24	V	0.000224213	44	0.000277712	94	0.00298362	44	3.22499e-05	4
RPN6	S000002255	YDL097C	non-ATPase regulatory subunit of the 26S proteasome	5	E	0.000516797	52	0.000127323	72	0.00039861	57	0.00101468	43
SNU23	S000002256	YDL098C	Component of the U4/U6.U5 snRNP complex	1	E	2.33147e-05	28	4.32602e-06	35	2.70083e-06	28	7.51319e-06	25
BUG1	S000002257	YDL099W	Cis-golgi localized protein involved in ER to Golgi transport	1	V	3.11577e-05	8	4.46573e-05	26	1.09289e-05	9	0	2
GET3	S000002258	YDL100C	Guanine nucleotide exchange factor for Gpa1p	18	V	0.000877212	52	0.000921029	123	0.00143963	35	0.00107078	11
DUN1	S000002259	YDL101C	Cell-cycle checkpoint serine-threonine kinase	80	V	0.000527931	57	0.000175039	93	0.000353315	43	0.00190264	26
POL3	S000002260	YDL102W	Catalytic subunit of DNA polymerase delta	86	E	2.76741e-05	6	0.000301005	119	0.00106888	71	0.000261327	31
QRI1	S000002261	YDL103C	UDP-N-acetylglucosamine pyrophosphorylase	2	E	3.65903e-05	15	5.29661e-05	25	2.40419e-05	8	0	2
NSE4	S000002263	YDL105W	Component of the SMC5-SMC6 complex	3	E	1.17419e-05	10	2.42661e-05	22	1.43935e-05	8	1.0289e-07	4
PHO2	S000002264	YDL106C	Homeobox transcription factor	76	V	0.000261372	28	0.000154387	51	0.000332919	23	0.00153416	13
MSS2	S000002265	YDL107W	Peripherally bound inner membrane protein of the mitochondrial matrix	5	V	5.02422e-05	5	1.91093e-05	11	3.2596e-05	4	0	2
KIN28	S000002266	YDL108W	Serine/threonine protein kinase	50	E	0.000150939	50	0.000281041	124	0.000726832	90	0.00109171	30
TMA17	S000002268	YDL110C	Protein of unknown function that associates with ribosomes	1	V	4.30191e-05	5	0.000616051	222	0.000825943	87	0.000164737	19
RRP42	S000002269	YDL111C	Exosome non-catalytic core component	0	E	4.80935e-05	27	4.46451e-05	107	5.28013e-05	26	0.000166227	16
TRM3	S000002270	YDL112W	2'-O-ribose methyltransferase	2	V	9.79942e-06	9	0.00014237	92	4.4935e-05	11	0.00021924	4
ATG20	S000002271	YDL113C	Sorting nexin required for the CVT pathway and endosomal sorting	4	V	0.000101655	18	8.31094e-05	41	0.000355302	15	1.33843e-05	3
IWR1	S000002273	YDL115C	RNA polymerase II transport factor, conserved from yeast to humans	3	V	4.02075e-05	23	9.85258e-05	60	8.99806e-05	24	0	13
NUP84	S000002274	YDL116W	Subunit of the nuclear pore complex (NPC)	23	V	7.47585e-05	52	0.000203723	118	0.00018087	62	0.000404637	38
CYK3	S000002275	YDL117W	SH3-domain protein located in the mother-bud neck and the actin ring	6	V	3.10457e-05	18	0.000656347	94	8.65582e-05	18	3.98233e-05	5
YDL118W	S000002276	YDL118W	Non-essential protein of unconfirmed function	0	V	0	1	2.92362e-06	5	0	1
YDL119C	S000002277	YDL119C	Putative mitochondrial transport protein	0	V	0	1	8.71174e-06	6	0	1
YFH1	S000002278	YDL120W	Mitochondrial matrix iron chaperone	41	E	6.31243e-06	14	0.000116202	55	0.000955919	27	0.00253376	10
YDL121C	S000002279	YDL121C	Putative protein of unknown function	0	V	1.87403e-06	3	1.4397e-05	43	3.30723e-06	4
UBP1	S000002280	YDL122W	Ubiquitin-specific protease	5	V	4.68278e-05	12	1.83333e-05	27	0.00043444	13	0	2
SNA4	S000002281	YDL123W	Protein of unknown function	1	V	0.000139174	20	9.99525e-05	19	6.62522e-05	6	0	2
YDL124W	S000002282	YDL124W	NADPH-dependent alpha-keto amide reductase	2	V	4.4852e-06	5	2.64245e-05	60	1.32483e-05	11
HNT1	S000002283	YDL125C	Adenosine 5'-monophosphoramidase	2	V	2.12274e-05	9	0.000295427	54	0.000432547	11	0	2
CDC48	S000002284	YDL126C	ATPase involved in ubiquitin-mediated protein degradation	95	E	0.00114005	91	0.000446307	108	0.00338854	68	0.00837982	38
PCL2	S000002285	YDL127W	Cyclin	21	V	6.44478e-06	6	0.00011832	48	0.000430456	22	0.000277631	12
VCX1	S000002286	YDL128W	Vacuolar membrane antiporter with Ca2ﱿ� and Kﱿ� exchange activity	12	V	9.52536e-06	10	0.000350288	28	3.70529e-05	10	3.79875e-05	4
YDL129W	S000002287	YDL129W	Putative protein of unknown function	0	V	4.76475e-08	2	1.637e-07	4	0	1
RPP1B	S000002288	YDL130W	Ribosomal protein P1 beta	0	V	2.26092e-05	24	0.000110746	159	9.12293e-05	87	8.00661e-05	36
LYS21	S000002289	YDL131W	Homocitrate synthase isozyme	7	V	5.69413e-05	23	6.50612e-05	37	0.000146243	22	6.04921e-05	4
CDC53	S000002290	YDL132W	Cullin	56	E	0.000328596	45	0.000536653	90	0.0018131	57	0.00315407	30
SRF1	S000002291	YDL133W	Regulator of phospholipase D (Spo14p)	1	V	2.01416e-06	3	1.81865e-05	15	0	2
PPH21	S000002292	YDL134C	Catalytic subunit of protein phosphatase 2A (PP2A)	20	V	0.000165242	29	0.000334236	87	0.00138428	51	0.000871064	20
RPL41B	S000002293	YDL133C-A	Ribosomal protein L47 of the large (60S) ribosomal subunit	2	V	2.37696e-07	4	9.38167e-06	61	3.86761e-06	9	0	1
RDI1	S000002294	YDL135C	Rho GDP dissociation inhibitor	4	V	1.29439e-05	7	4.01498e-05	32	4.1525e-05	8	1.3705e-06	5
RPL35B	S000002295	YDL136W	Protein component of the large (60S) ribosomal subunit	0	V	8.19849e-05	83	7.80345e-05	173	5.99224e-05	135	0.000197715	106
ARF2	S000002296	YDL137W	ADP-ribosylation factor	16	V	7.35813e-05	16	0.00011665	48	0.000139429	19	0.000276833	9
RGT2	S000002297	YDL138W	Plasma membrane high glucose sensor that regulates glucose transport	48	V	1.50216e-05	5	0.000248564	31	3.51469e-05	12	2.36595e-05	5
SCM3	S000002298	YDL139C	Nonhistone component of centromeric chromatin that binds CenH3-H4	20	E	8.24039e-05	21	1.89836e-05	20	3.45401e-05	12	0	2
RPO21	S000002299	YDL140C	RNA polymerase II largest subunit B220	18	E	0.00311487	172	0.00233811	309	0.0087057	246	0.0187075	107
BPL1	S000002300	YDL141W	Biotin:apoprotein ligase	4	E	7.54586e-06	6	4.63648e-05	34	7.58109e-05	9
CRD1	S000002301	YDL142C	Cardiolipin synthase	16	V	0	1	0.00014684	54	0.000585066	24	0.000640544	4
CCT4	S000002302	YDL143W	Subunit of the cytosolic chaperonin Cct ring complex	3	E	0.000264234	42	0.000189138	79	0.0008581	53	0.000544497	17
YDL144C	S000002303	YDL144C	Putative protein of unknown function	0	V	2.43566e-05	7	5.47022e-06	7	0	1
COP1	S000002304	YDL145C	Alpha subunit of COPI vesicle coatomer complex	11	E	0.000485605	53	0.000304885	100	0.00111265	43	0.00435638	21
LDB17	S000002305	YDL146W	Protein involved in the regulation of endocytosis	2	V	0.000343286	5	3.25083e-05	13	7.17741e-07	6	1.13108e-06	4
RPN5	S000002306	YDL147W	Subunit of the CSN and 26S proteasome lid complexes	9	E	0.000930314	94	0.00044585	112	0.00137947	70	0.000937401	48
NOP14	S000002307	YDL148C	Nucleolar protein	4	E	0.000286107	74	0.000385014	356	0.000435963	228	0.000139479	129
ATG9	S000002308	YDL149W	Transmembrane protein involved in forming Cvt and autophagic vesicles	33	V	9.57611e-05	25	8.51946e-05	55	0.000427988	17	0.000944504	8
RPC53	S000002309	YDL150W	RNA polymerase III subunit C53	9	E	0.000116217	24	0.000232927	311	0.000534417	183	0.000655748	39
SAS10	S000002312	YDL153C	Essential subunit of U3-containing SSU processome complex	3	E	0.000264241	49	0.000128266	343	0.000459819	231	0.000253368	128
MSH5	S000002313	YDL154W	Protein of the MutS family	28	V	6.77719e-06	8	4.57125e-05	31	2.29258e-05	16	2.8539e-05	8
CLB3	S000002314	YDL155W	B-type cyclin involved in cell cycle progression	31	V	0.00015892	40	0.000200047	91	0.000273481	37	0.000738996	25
YDL156W	S000002315	YDL156W	Putative protein of unknown function	0	V	1.08938e-05	14	1.60014e-05	19	2.51739e-05	11	3.40241e-06	4
YDL157C	S000002316	YDL157C	Putative protein of unknown function	0	V	0	2	2.39956e-06	8	0	1	0	1
STE7	S000002318	YDL159W	Signal transducing MAP kinase kinase involved in pheromone response	100	V	0.000322057	27	0.000200143	68	0.000240588	36	0.000125369	11
DHH1	S000002319	YDL160C	Cytoplasmic DExD/H-box helicase, stimulates mRNA decapping	34	V	0.000646238	75	0.000274519	100	0.00253138	77	0.00190651	33
ENT1	S000002320	YDL161W	Epsin-like protein required for endocytosis and actin patch assembly	13	V	2.0645e-05	12	3.64074e-05	30	3.43234e-05	14	1.69196e-05	4
CDC9	S000002323	YDL164C	DNA ligase found in the nucleus and mitochondria	68	E	6.14583e-05	16	0.000118802	70	3.06627e-05	20	3.72737e-05	9
CDC36	S000002324	YDL165W	Component of the CCR4-NOT transcriptional complex	29	E	0.00011987	39	0.000170544	58	0.000237463	31	0.000360878	10
FAP7	S000002325	YDL166C	Essential NTPase required for small ribosome subunit synthesis	3	E	1.22474e-05	11	0.000254199	248	0.000119539	76	3.81326e-06	11
NRP1	S000002326	YDL167C	Putative RNA binding protein of unknown function	1	V	1.80361e-05	7	0.000224379	318	0.000263716	169	4.20389e-05	40
SFA1	S000002327	YDL168W	Bifunctional alcohol dehydrogenase and formaldehyde dehydrogenase	7	V	0.000122409	11	6.61358e-05	37	0.000359233	28	0.000965007	9
UGX2	S000002328	YDL169C	Protein of unknown function	1	V	1.13647e-05	2	8.65737e-05	88	7.87035e-05	21
UGA3	S000002329	YDL170W	Transcriptional activator for GABA-dependent induction of GABA genes	13	V	0	2	0.000156864	50	0.000269512	19	0.000136677	5
GLT1	S000002330	YDL171C	NAD()-dependent glutamate synthase (GOGAT)	13	V	4.28656e-05	23	0.000135124	70	0.000485773	43	0.00040317	8
PAR32	S000002332	YDL173W	Putative protein of unknown function	0	V	0.000282107	9	0.000328775	9	1.7847e-06	3
DLD1	S000002333	YDL174C	D-lactate dehydrogenase	4	V	3.83867e-06	4	0.00010869	48	0.000129373	19	3.40948e-05	6
AIR2	S000002334	YDL175C	Zinc knuckle protein	6	V	7.28316e-05	21	0.000190849	82	0.000272979	28	0.000126365	12
YDL176W	S000002335	YDL176W	Protein of unknown function	0	V	1.06297e-05	5	2.40854e-06	6	2.60038e-05	4	0	1
DLD2	S000002337	YDL178W	D-lactate dehydrogenase	3	V	1.00426e-07	3	3.41248e-06	11	7.31915e-07	2	0	1
PCL9	S000002338	YDL179W	Cyclin	6	V	8.02598e-06	9	0.000104231	44	0.000343772	26	0.000203262	9
YDL180W	S000002339	YDL180W	Putative protein of unknown function	0	V	0	2	3.35939e-07	3	0	1
INH1	S000002340	YDL181W	Protein that inhibits ATP hydrolysis by the F1F0-ATP synthase	5	V	5.60508e-05	14	0.000116214	78	0.000301133	41	0.00117579	16
LYS20	S000002341	YDL182W	Homocitrate synthase isozyme	6	V	8.76416e-05	29	0.000127996	61	0.00062571	31	1.40008e-05	3
YDL183C	S000002342	YDL183C	Protein that may form an active mitochondrial KHE system	2	V	7.09671e-08	2	8.10785e-06	17	0	1	0	1
RPL41A	S000002343	YDL184C	Ribosomal protein L47 of the large (60S) ribosomal subunit	2	V	3.77433e-06	12	9.66612e-06	72	3.68691e-05	18	0	2
VMA1	S000002344	YDL185W	Subunit A of the V1 peripheral membrane domain of V-ATPase	45	V	0.000477008	67	0.000646699	124	0.00306154	83	0.00236254	22
YDL186W	S000002345	YDL186W	Putative protein of unknown function	0	V	2.79753e-06	5	9.02227e-07	4	0	1
PPH22	S000002347	YDL188C	Catalytic subunit of protein phosphatase 2A (PP2A)	22	V	0.000199398	46	0.000264819	67	0.000593934	51	0.000983009	20
RBS1	S000002348	YDL189W	Protein of unknown function	0	V	3.4539e-05	11	1.30656e-05	13	9.25042e-05	8	0.000391632	4
UFD2	S000002349	YDL190C	Ubiquitin chain assembly factor (E4)	19	V	0.000412259	21	0.00036717	35	5.41345e-05	16	0.000388454	10
RPL35A	S000002350	YDL191W	Protein component of the large (60S) ribosomal subunit	6	V	8.95407e-05	30	0.000464895	334	0.000692387	199	0.000265442	109
ARF1	S000002351	YDL192W	ADP-ribosylation factor	48	V	0.000641535	76	0.00090563	193	0.00317821	82	0.00417503	30
NUS1	S000002352	YDL193W	Putative prenyltransferase	2	E	2.14533e-06	8	7.92416e-05	44	1.71333e-05	8
SNF3	S000002353	YDL194W	Plasma membrane low glucose sensor that regulates glucose transport	84	V	1.05645e-05	6	3.30048e-05	27	0.000104346	21	0.000234592	12
SEC31	S000002354	YDL195W	Component of the Sec13p-Sec31p complex of the COPII vesicle coat	24	E	0.000151463	43	0.000116249	53	0.000375096	30	0.000131015	12
ASF2	S000002356	YDL197C	Anti-silencing protein	4	V	2.09375e-05	8	2.9054e-05	21	3.45427e-07	3
GGC1	S000002357	YDL198C	Mitochondrial GTP/GDP transporter	3	V	2.73831e-05	12	0.000186587	82	0.000458086	41	0.000158465	13
YDL199C	S000002358	YDL199C	Putative transporter	0	V	8.19294e-05	13	0.000198882	82	4.92749e-05	9
MGT1	S000002359	YDL200C	DNA repair methyltransferase (6-O-methylguanine-DNA methylase)	20	V	5.83031e-05	20	0.000105127	52	2.7989e-05	6	3.91348e-06	3
TRM8	S000002360	YDL201W	Noncatalytic subunit of a tRNA methyltransferase complex	8	V	2.53319e-05	8	0.000307044	369	0.00067303	218	0.00015743	87
MRPL11	S000002361	YDL202W	Mitochondrial ribosomal protein of the large subunit	1	V	8.15595e-06	6	3.7747e-05	29	2.90354e-07	4	0	1
ACK1	S000002362	YDL203C	Protein that functions in the cell wall integrity pathway	1	V	4.87168e-05	17	3.33978e-05	30	0.000203236	15	0.000749999	7
RTN2	S000002363	YDL204W	Protein of unknown function	1	V	1.48197e-05	11	0.000361457	221	0.0010608	107	0.000513843	33
HEM3	S000002364	YDL205C	Porphobilinogen deaminase	5	E	0	1	0.000179253	54	0.000100215	11	5.41469e-05	5
GLE1	S000002366	YDL207W	Cytoplasmic nucleoporin required for polyadenylated RNA export	24	E	2.19471e-05	38	3.70461e-05	70	0.000280885	63	0.00139177	34
NHP2	S000002367	YDL208W	Protein related to mammalian high mobility group (HMG) proteins	16	E	0.00111393	58	0.000566839	328	0.00127879	139	7.5564e-05	41
CWC2	S000002368	YDL209C	Member of the NineTeen Complex (NTC)	4	E	0.000137632	52	0.000130557	64	0.000395488	48	0.000526151	41
UGA4	S000002369	YDL210W	GABA (gamma-aminobutyrate) permease	28	V	0.000190331	14	0.000192585	35	7.13629e-05	13	0.000444034	5
SHR3	S000002371	YDL212W	Endoplasmic reticulum packaging chaperone	23	E	0.000270271	65	0.000309592	90	0.000226663	21	0.00105749	10
NOP6	S000002372	YDL213C	rRNA-binding protein required for 40S ribosomal subunit biogenesis	2	V	0.000499909	83	0.000208617	216	5.6946e-06	98	1.16554e-06	16
GDH2	S000002374	YDL215C	NAD()-dependent glutamate dehydrogenase	23	V	5.53571e-05	18	0.000304488	89	0.00132864	66	0.000827986	10
RRI1	S000002375	YDL216C	Catalytic subunit of the COP9 signalosome (CSN) complex	2	V	1.90843e-05	8	4.07799e-05	20	4.36624e-05	13	4.18572e-05	8
TIM22	S000002376	YDL217C	Essential core component of the mitochondrial TIM22 complex	36	E	2.14838e-05	9	8.62008e-05	31	9.50747e-06	18	3.13355e-08	8
DTD1	S000002378	YDL219W	D-Tyr-tRNA(Tyr) deacylase	2	V	5.50371e-06	5	0.000120903	58	3.6997e-05	6	0	1
CDC13	S000002379	YDL220C	Single stranded DNA-binding protein found at TG1-3 telomere G-tails	135	E	0.000489108	40	0.00770697	423	0.00223602	76	0.00494752	40
FMP45	S000002381	YDL222C	Integral membrane protein localized to mitochondria	1	V	0.000293705	47	0.000149782	124	7.58429e-05	48	0.000107472	16
HBT1	S000002382	YDL223C	Substrate of the Hub1p ubiquitin-like protein	1	V	0.000167075	14	0.000165971	111	0.000151391	45	0.000263404	18
WHI4	S000002383	YDL224C	Putative RNA binding protein	1	V	1.4308e-05	8	1.99525e-05	25	1.25588e-05	10	2.24163e-06	5
SHS1	S000002384	YDL225W	Component of the septin ring that is required for cytokinesis	20	V	8.83621e-05	36	0.000214713	60	0.000458734	30	0.000642167	17
GCS1	S000002385	YDL226C	ADP-ribosylation factor GTPase activating protein (ARF GAP)	25	V	4.19731e-05	19	0.000231017	90	0.00162211	57	0.000949552	14
HO	S000002386	YDL227C	Site-specific endonuclease	486	V	1.50481e-06	9	9.45541e-05	52	0.000241122	25	0	1
SSB1	S000002388	YDL229W	Cytoplasmic ATPase that is a ribosome-associated molecular chaperone	67	V	0.0117313	384	0.000298849	104	0.0012607	62	0.00034379	12
PTP1	S000002389	YDL230W	Phosphotyrosine-specific protein phosphatase	9	V	2.00251e-05	16	2.41893e-05	20	0	1
OST4	S000002391	YDL232W	Subunit of the oligosaccharyltransferase complex of the ER lumen	6	V	0.000226738	27	7.89706e-05	33	4.54585e-06	13	7.32604e-06	11
YDL233W	S000002392	YDL233W	Putative protein of unknown function	0	V	3.77445e-05	7	1.03157e-05	7	3.52009e-07	5
GYP7	S000002393	YDL234C	GTPase-activating protein for yeast Rab family members	6	V	0	2	9.31147e-05	52	4.21871e-05	10	0	1
YPD1	S000002394	YDL235C	Phosphorelay intermediate protein	33	E	8.36857e-05	11	2.70395e-05	17	1.04187e-05	9	2.29863e-05	6
PHO13	S000002395	YDL236W	Alkaline phosphatase specific for p-nitrophenyl phosphate	6	V	3.61689e-05	14	2.27901e-05	29	4.84617e-06	2	0	1
GUD1	S000002397	YDL238C	Guanine deaminase	1	V	6.01725e-05	3	3.7225e-05	18	0.000368324	7	0	3
ADY3	S000002398	YDL239C	Protein required for spore wall formation	1	V	0.000334777	38	0.000155098	40	0.000310524	22	0.00104162	9
LRG1	S000002399	YDL240W	Putative GTPase-activating protein (GAP)	8	V	2.71232e-06	6	1.76878e-05	27	8.45992e-05	19	0	3
YDL241W	S000002400	YDL241W	Putative protein of unknown function	0	V	0	2	0	2	0	1
AAD4	S000002402	YDL243C	Putative aryl-alcohol dehydrogenase	1	V	0	2	4.92172e-05	8	0.000364163	3	0	1
THI13	S000002403	YDL244W	Protein involved in synthesis of hydroxymethylpyrimidine (HMP)	2	V	2.33157e-07	2	1.74191e-05	4	0	1	0	1
HXT15	S000002404	YDL245C	Protein of unknown function with similarity to hexose transporters	3	V	1.00978e-05	4	1.35473e-07	3	0	1
SOR2	S000002405	YDL246C	Protein of unknown function	0	V	3.22356e-06	8	0.00058769	38	0.000870772	20	1.88013e-07	3
COS7	S000002407	YDL248W	Protein of unknown function	23	V	1.01515e-07	2	5.74042e-06	12	1.66772e-08	4	0	2
NTH1	S000002408	YDR001C	Neutral trehalase	29	V	4.575e-05	20	0.000302002	202	0.00128283	85	0.000614915	23
YRB1	S000002409	YDR002W	Ran GTPase binding protein	9	E	0.000249969	15	0.000183059	77	9.19453e-05	15	0.00013397	8
RCR2	S000002410	YDR003W	Vacuolar protein that may be involved in endosome-vacuole trafficking	1	V	0	3	7.3571e-06	17	2.10394e-06	3	0	1
RAD57	S000002411	YDR004W	Protein that stimulates strand exchange	92	V	4.53581e-05	7	0.000169025	71	2.2237e-05	33	9.71147e-06	15
MAF1	S000002412	YDR005C	Highly conserved negative regulator of RNA polymerase III	27	V	4.18639e-05	19	0.000152128	118	0.00107415	102	0.000230201	14
SOK1	S000002413	YDR006C	Protein whose overexpression suppresses growth defects of PKA mutants	2	V	7.0708e-06	9	9.11729e-06	15	5.55274e-05	9	0	1
TRP1	S000002414	YDR007W	Phosphoribosylanthranilate isomerase	235	V	3.37473e-06	5	0.000568861	55	0.000315494	22	0.000231521	6
GAL3	S000002416	YDR009W	Transcriptional regulator	70	V	7.82752e-07	4	2.11506e-05	33	8.18948e-05	18	0.000185239	7
SNQ2	S000002418	YDR011W	Plasma membrane ATP-binding cassette (ABC) transporter	53	V	9.75346e-05	26	0.000180405	49	7.2208e-05	16	0.000268638	6
RPL4B	S000002419	YDR012W	Protein component of the large (60S) ribosomal subunit	1	V	0.000268117	102	0.00012215	216	0.000186738	142	0.000488346	93
PSF1	S000002420	YDR013W	Subunit of the GINS complex	5	E	9.16735e-06	21	8.92754e-05	57	6.17966e-05	37	0.000325766	23
RAD61	S000002421	YDR014W	Subunit of a complex that inhibits sister chromatid cohesion	7	V	7.29649e-06	3	0.000448503	43	1.23326e-05	18	8.75572e-05	10
DAD1	S000002423	YDR016C	Essential subunit of the Dam1 complex (aka DASH complex)	10	E	0.000108677	22	0.00015634	66	8.9614e-05	54	6.44369e-06	13
KCS1	S000002424	YDR017C	Inositol hexakisphosphate and inositol heptakisphosphate kinase	19	V	1.12715e-05	11	3.95298e-05	38	0.000257544	18	0.000108279	4
YDR018C	S000002425	YDR018C	Probable membrane protein with three predicted transmembrane domains	1	V	0	2	7.94873e-05	16	0	1
GCV1	S000002426	YDR019C	T subunit of the mitochondrial glycine decarboxylase complex	7	V	1.65503e-07	2	7.32122e-05	59	0.000235812	29	0.000688295	16
DAS2	S000002427	YDR020C	Putative protein of unknown function	2	V	3.68094e-07	5	1.16215e-05	13	1.34734e-06	3	0	1
FAL1	S000002428	YDR021W	Nucleolar protein required for maturation of 18S rRNA	4	E	8.25771e-07	5	0.000259562	270	0.000144836	145	1.56415e-08	20
CIS1	S000002429	YDR022C	Autophagy-specific protein required for autophagosome formation	3	V	3.89958e-06	6	2.02556e-05	23	2.99079e-05	7	0.000296086	5
SES1	S000002430	YDR023W	Cytosolic seryl-tRNA synthetase	3	E	0.00665133	55	0.000563986	269	0.000568973	102	0.000514087	14
RPS11A	S000002432	YDR025W	Protein component of the small (40S) ribosomal subunit	0	V	0.000151054	87	0.000362153	323	0.000263626	169	0.000166818	93
YDR026C	S000002433	YDR026C	Protein of unknown function that may interact with ribosomes	0	V	8.62536e-06	12	2.16792e-05	27	9.7585e-05	15	2.67503e-05	3
VPS54	S000002434	YDR027C	Component of the GARP (Golgi-associated retrograde protein) complex	10	V	2.54724e-05	19	6.94518e-05	55	0.000297235	28	9.81298e-05	8
REG1	S000002435	YDR028C	Regulatory subunit of type 1 protein phosphatase Glc7p	71	V	6.6877e-05	33	0.00023504	103	0.00132208	54	0.00154051	22
RAD28	S000002437	YDR030C	Protein involved in DNA repair	4	V	1.05219e-05	5	2.91527e-05	30	1.78379e-05	17	0	2
PST2	S000002439	YDR032C	Protein with similarity to flavodoxin-like proteins	4	V	0.000425875	54	0.000329183	153	0.000698859	56	0.000505273	9
MRH1	S000002440	YDR033W	Protein that localizes primarily to the plasma membrane	2	V	3.77433e-05	15	0.000163701	33	1.82587e-05	4
LYS14	S000002441	YDR034C	Transcriptional activator involved in regulating lysine biosynthesis	17	V	1.38555e-05	4	0.000509601	47	3.70046e-06	4
ARO3	S000002442	YDR035W	3-deoxy-D-arabino-heptulosonate-7-phosphate (DAHP) synthase	9	V	1.16641e-06	6	0.000152078	74	0.000763129	42	0.000332208	9
EHD3	S000002443	YDR036C	3-hydroxyisobutyryl-CoA hydrolase	2	V	1.59478e-05	24	3.2615e-05	37	3.35975e-05	23	0	19
KRS1	S000002444	YDR037W	Lysyl-tRNA synthetase	4	E	1.21958e-05	18	0.000383218	224	0.000297554	50	0.000206589	7
ENA5	S000002445	YDR038C	Protein with similarity to P-type ATPase sodium pumps	1	V	7.67905e-06	7	1.36231e-05	12	1.06983e-05	3	0	2
ENA2	S000002446	YDR039C	P-type ATPase sodium pump	5	V	3.69924e-05	10	1.04724e-05	12	5.70408e-05	4	0	2
ENA1	S000002447	YDR040C	P-type ATPase sodium pump	91	V	8.46266e-07	4	0.000127435	51	0.000856881	29	0.00162499	12
RSM10	S000002448	YDR041W	Mitochondrial ribosomal protein of the small subunit	0	E	3.65687e-05	31	8.5889e-05	101	0.000244027	63	0.000813041	40
NRG1	S000002450	YDR043C	Transcriptional repressor that recruits the Cyc8p-Tup1p complex	31	V	8.39036e-06	7	5.76795e-05	38	0.000122722	13	0.000110755	4
HEM13	S000002451	YDR044W	Coproporphyrinogen III oxidase	18	E	3.17346e-05	23	0.000519292	88	0.00192735	41	0.00132072	8
RPC11	S000002452	YDR045C	RNA polymerase III subunit C11	4	E	8.27927e-05	19	0.000148263	124	0.000297487	73	2.44826e-05	28
BAP3	S000002453	YDR046C	Amino acid permease involved in the uptake of cysteine	16	V	3.89115e-05	12	6.67753e-06	7	0	1
HEM12	S000002454	YDR047W	Uroporphyrinogen decarboxylase	7	E	8.28817e-06	6	7.89663e-05	47	0.000340889	13	0.000147988	6
VMS1	S000002456	YDR049W	Component of a Cdc48p-complex involved in protein quality control	2	V	3.14885e-05	10	1.63592e-05	25	2.85619e-06	5	2.63874e-05	3
TPI1	S000002457	YDR050C	Triose phosphate isomerase, abundant glycolytic enzyme	19	E	6.59767e-05	24	0.000383709	112	0.000489388	26	0.00106856	11
DET1	S000002458	YDR051C	Acid phosphatase involved in the non-vesicular transport of sterols	3	V	1.02147e-05	6	3.20374e-05	13	7.06834e-06	3	0	1
DBF4	S000002459	YDR052C	Regulatory subunit of Cdc7p-Dbf4p kinase complex	89	E	9.32802e-05	25	0.000124945	57	7.70173e-05	29	5.33052e-05	14
CDC34	S000002461	YDR054C	E2 enzyme and catalytic subunit of SCF ubiquitin ligase complex	90	E	0.000326738	41	0.000290427	100	0.00308582	77	0.00293968	25
PST1	S000002462	YDR055W	Cell wall protein that contains a putative GPI-attachment site	8	V	9.14363e-07	3	1.22388e-05	10	1.20076e-05	3
YOS9	S000002464	YDR057W	ER quality-control lectin	14	V	0.000361545	17	3.48009e-05	36	0.00010989	18	0.000447933	9
TGL2	S000002465	YDR058C	Triacylglycerol lipase that is localized to the mitochondria	2	V	0	2	2.09548e-05	14	3.40603e-05	6
UBC5	S000002466	YDR059C	Ubiquitin-conjugating enzyme	43	V	8.33498e-06	11	0.000125613	66	0.000100282	18	0.00010919	5
MAK21	S000002467	YDR060W	Constituent of 66S pre-ribosomal particles	6	E	0.000143403	99	0.000166135	296	0.000344872	170	0.000517713	81
LCB2	S000002469	YDR062W	Component of serine palmitoyltransferase	19	E	6.53577e-05	22	0.000160245	52	0.00109895	38	0.00125469	12
AIM7	S000002470	YDR063W	Protein that interacts with Arp2/3 complex	1	V	1.07511e-05	9	0.000329236	11	2.2054e-05	5	0	1
RPS13	S000002471	YDR064W	Protein component of the small (40S) ribosomal subunit	2	E	0.000292295	142	0.00039512	397	0.00120041	275	0.0029891	205
RRG1	S000002472	YDR065W	Protein of unknown function	3	V	0	2	0	1	0	1
RTR2	S000002473	YDR066C	Protein of unknown function with high similarity to Rtr1p	0	V			0	1	0	1
OCA6	S000002474	YDR067C	Cytoplasmic protein required for replication of Brome mosaic virus	1	V	7.52625e-06	2	1.19245e-05	8	0	3	0	3
DOS2	S000002475	YDR068W	Protein of unknown function	0	V	0.000126603	15	1.93274e-05	10	1.91228e-06	2	0	1
DOA4	S000002476	YDR069C	Ubiquitin isopeptidase	41	V	4.4253e-05	19	0.000408572	110	0.00238965	55	0.00197206	14
FMP16	S000002477	YDR070C	Putative protein of unknown function	1	V	2.08315e-05	7	0.000264341	183	0.000778118	96	0.000879881	32
PAA1	S000002478	YDR071C	Polyamine acetyltransferase	0	V	3.89486e-05	18	4.30502e-05	31	0.000137547	14	0.000180909	4
IPT1	S000002479	YDR072C	Inositolphosphotransferase	16	V	2.12251e-05	6	0.000138879	40	0.000249064	23	0.000327203	5
SNF11	S000002480	YDR073W	Subunit of the SWI/SNF chromatin remodeling complex	5	V	6.34413e-05	16	0.000190217	66	1.90614e-05	15	0	10
TPS2	S000002481	YDR074W	Phosphatase subunit of the trehalose-6-phosphate synthase complex	34	V	8.74774e-05	19	0.000535285	220	0.00112668	107	0.00101795	39
PPH3	S000002482	YDR075W	Catalytic subunit of protein phosphatase PP4 complex	27	V	2.35731e-05	21	0.000484842	171	0.000390242	49	0.000706916	21
RAD55	S000002483	YDR076W	Protein that stimulates strand exchange	70	V	2.79108e-05	9	0.000118545	86	0.000188925	49	0.000987195	27
SED1	S000002484	YDR077W	Stress-induced structural GPI-cell wall glycoprotein	26	V	0.000353623	6	3.70222e-05	26	7.23212e-05	10	2.3073e-05	2
SHU2	S000002485	YDR078C	Component of the Shu complex, which promotes error-free DNA repair	6	V	4.16673e-05	5	6.03834e-05	23	1.64387e-05	5	0	4
PET100	S000002486	YDR079W	Chaperone that facilitates the assembly of cytochrome c oxidase	4	V	0	3	1.15201e-05	15	0	1
VPS41	S000002487	YDR080W	Subunit of the HOPS complex	21	V	0.000102349	27	0.000115632	55	0.000603183	34	0.00182995	18
PDC2	S000002488	YDR081C	Putative transcription factor for thiamine-regulated genes	13	E	5.75901e-05	6	6.87053e-05	18	3.49671e-05	10	3.5131e-05	2
STN1	S000002489	YDR082W	Telomere end-binding and capping protein	32	E	1.88542e-05	5	0.000945702	51	0.000313937	20	8.18577e-06	8
RRP8	S000002490	YDR083W	Nucleolar protein involved in rRNA processing	1	V	6.28152e-07	7	0.00025901	406	0.000519753	267	0.000777313	163
TVP23	S000002491	YDR084C	Integral membrane protein localized to late Golgi vesicles	4	V	7.34719e-05	10	6.35046e-05	32	0.000417208	9	0.000414583	4
AFR1	S000002492	YDR085C	Protein required for pheromone-induced projection (shmoo) formation	12	V	3.82937e-05	12	0.000213126	64	4.92909e-05	10	9.65498e-06	2
SSS1	S000002493	YDR086C	Subunit of the Sec61p translocation complex (Sec61p-Sss1p-Sbh1p)	13	E	0.000268847	21	0.000162514	61	0.000157357	29	0.00133318	14
RRP1	S000002494	YDR087C	Essential evolutionarily conserved nucleolar protein	5	E	0.000440162	85	0.000678875	382	0.00265801	265	0.00105772	124
SLU7	S000002495	YDR088C	RNA splicing factor	18	E	7.81067e-06	19	3.33993e-05	40	1.18205e-06	16	6.16403e-06	13
RLI1	S000002498	YDR091C	Protein required for ribosome biogenesis and translation	5	E	0.000109859	56	0.00114147	471	0.00249784	223	0.00169148	87
UBC13	S000002499	YDR092W	E2 ubiquitin-conjugating enzyme	40	V	0.000837835	18	6.37053e-05	43	0.000119768	25	0.000606486	14
DNF2	S000002500	YDR093W	Plasma membrane aminophospholipid translocase (flippase)	13	V	2.54285e-05	10	4.85348e-05	31	7.14945e-05	8	4.70032e-08	3
GIS1	S000002503	YDR096W	JmjC domain-containing histone demethylase and transcription factor	17	V	6.58748e-05	24	0.000415931	113	0.000807286	39	0.000221237	6
MSH6	S000002504	YDR097C	Protein required for mismatch repair in mitosis and meiosis	92	V	0.000116677	26	0.000162775	74	0.000523953	43	0.000539943	25
GRX3	S000002505	YDR098C	Glutathione-dependent oxidoreductase	16	V	8.67389e-05	16	4.12393e-05	25	0.000166156	8	0.000534937	5
BMH2	S000002506	YDR099W	14-3-3 protein	44	V	0.00153581	111	0.000657496	146	0.00417086	99	0.00313544	27
TVP15	S000002507	YDR100W	Integral membrane protein localized to late Golgi vesicles	2	V	0.000402434	65	0.000465686	53	0.000265102	14	0.00119551	10
ARX1	S000002508	YDR101C	Shuttling pre-60S factor	9	V	0.000101787	78	0.00103846	538	0.0027399	362	0.00686955	244
STE5	S000002510	YDR103W	Pheromone-response scaffold protein that controls the mating decision	112	V	0.000115891	27	0.000157387	70	0.000828252	44	0.00111713	20
SPO71	S000002511	YDR104C	Meiosis-specific protein of unknown function	0	V	1.13972e-05	4	1.31781e-05	8	0	1
TMS1	S000002512	YDR105C	Vacuolar membrane protein of unknown function	3	V	8.05676e-07	6	1.83659e-06	8	5.54239e-06	2	0	1
ARP10	S000002513	YDR106W	Component of the dynactin complex	3	V	1.22881e-05	6	2.57321e-06	7	0	4	0	4
TMN2	S000002514	YDR107C	Protein with a role in cellular adhesion and filamentous growth	0	V	6.35269e-06	5	3.1436e-05	11	1.4348e-05	4
TRS85	S000002515	YDR108W	Subunit of TRAPPIII (transport protein particle)	5	V	8.83298e-05	19	0.000712694	126	0.000991519	30	0.00106223	15
FOB1	S000002517	YDR110W	Nucleolar protein that binds the rDNA replication fork barrier site	50	V	7.54118e-05	30	0.000151714	65	0.000183527	30	4.56554e-05	7
ALT2	S000002518	YDR111C	Putative alanine transaminase (glutamic pyruvic transaminase)	2	V	1.27982e-06	5	0.000330754	15	3.93445e-05	8	1.52856e-05	2
PDS1	S000002520	YDR113C	Securin	114	E	0.000509513	38	0.000227055	109	0.00123679	79	0.00179553	38
YDR115W	S000002522	YDR115W	Putative mitochondrial ribosomal protein of the large subunit	0	V	2.55807e-06	3	6.38554e-05	57	0.000162359	12	0	2
MRPL1	S000002523	YDR116C	Mitochondrial ribosomal protein of the large subunit	1	V	5.23454e-05	35	0.000135154	109	0.000279995	56	0.000427051	35
TMA64	S000002524	YDR117C	Protein of unknown function that associates with ribosomes	0	V	2.36635e-08	6	8.80459e-07	11	4.62351e-07	5	2.20501e-07	4
APC4	S000002525	YDR118W	Subunit of the Anaphase-Promoting Complex/Cyclosome (APC/C), which is	5	E	0.000191773	26	0.000187857	50	0.000333592	41	0.000158757	21
VBA4	S000002526	YDR119W	Protein of unknown function proposed to be a basic amino acid permease	0	V	2.69786e-05	7	3.29117e-05	83	6.78296e-08	6
TRM1	S000002527	YDR120C	tRNA methyltransferase	16	V	0.000105971	18	0.000499288	416	0.00083864	271	0.00166126	163
DPB4	S000002528	YDR121W	Subunit of DNA pol (II) epsilon and ISW2/yCHRAC complexes	8	V	3.95251e-05	21	6.67289e-05	70	7.41539e-05	23	7.24279e-05	8
KIN1	S000002529	YDR122W	Serine/threonine protein kinase involved in regulation of exocytosis	10	V	0.000483919	34	0.000218332	55	4.95451e-05	18	5.56812e-05	5
INO2	S000002530	YDR123C	Component of the Ino2p/Ino4p transcription activator	82	V	2.22885e-05	10	0.000230392	80	0.000602656	29	0.000940055	11
YDR124W	S000002531	YDR124W	Putative protein of unknown function	0	V	1.65838e-05	13	7.99077e-05	25	4.3838e-05	12	0	7
SWF1	S000002533	YDR126W	Palmitoyltransferase that acts on transmembrane proteins	1	V	2.93862e-06	3	5.97306e-05	40	2.49622e-05	6	0	1
ARO1	S000002534	YDR127W	Pentafunctional arom protein	8	V	0.000102777	41	0.000277555	95	0.000533694	33	0.000412642	8
MTC5	S000002535	YDR128W	Subunit of the SEA (Seh1-associated) complex	0	V	0.000106631	24	6.14636e-05	21	1.02449e-06	2
SAC6	S000002536	YDR129C	Fimbrin	31	V	7.83791e-05	35	0.000236561	80	0.000979919	42	0.00106359	13
FIN1	S000002537	YDR130C	Spindle pole body-related intermediate filament protein	7	V	0.000226491	92	0.000805428	163	0.000284823	63	0.000983804	17
YDR131C	S000002538	YDR131C	F-box subunit of SCF ubiquitin ligase complex	0	V	5.66332e-06	9	1.45072e-06	8	3.89483e-06	5	0	1
YDR132C	S000002539	YDR132C	Putative protein of unknown function	0	V	9.37361e-06	12	1.8129e-05	13	5.39396e-06	2
YCF1	S000002542	YDR135C	Vacuolar glutathione S-conjugate transporter	55	V	8.47909e-05	19	7.42085e-05	30	0.000244513	15	0.00054526	3
RGP1	S000002544	YDR137W	Subunit of a Golgi membrane exchange factor (Ric1p-Rgp1p)	4	V	6.3719e-06	9	0.000551117	125	0.000178197	21	0	2
HPR1	S000002545	YDR138W	Subunit of THO/TREX complexes	48	V	0.000153754	44	0.000442017	133	0.0020013	85	0.000987129	27
RUB1	S000002546	YDR139C	Ubiquitin-like protein with similarity to mammalian NEDD8	15	V	0.000345151	20	0.000148922	50	0.000442502	20	0.000920513	9
MTQ2	S000002547	YDR140W	S-adoMet-dependent methyltransferase of the seven beta-strand family	5	V	9.19893e-05	7	5.1693e-05	31	2.24545e-05	8	0.000235375	4
DOP1	S000002548	YDR141C	Golgi-localized, leucine-zipper domain containing protein	3	E	3.15315e-05	21	8.34039e-06	17	6.77729e-05	8	0	2
PEX7	S000002549	YDR142C	Peroxisomal signal receptor for peroxisomal matrix proteins	17	V	5.30654e-05	25	3.92304e-05	31	0.000427691	14	7.84549e-05	10
SAN1	S000002550	YDR143C	Ubiquitin-protein ligase	9	V	0.000530903	60	4.11311e-05	29	3.327e-05	13	0.000304283	7
MKC7	S000002551	YDR144C	GPI-anchored aspartyl protease	11	V	0	1	0.000216175	104	0.000501336	20	0.000419362	3
TAF12	S000002552	YDR145W	Subunit (61/68 kDa) of TFIID and SAGA complexes	5	E	0.00113572	112	0.000381173	118	0.000601284	83	0.000265002	39
SWI5	S000002553	YDR146C	Transcription factor that activates transcription of G1 genes	77	V	0.000113835	34	0.000502886	127	0.00122781	70	0.00193463	26
EKI1	S000002554	YDR147W	Ethanolamine kinase	4	V	2.04191e-06	4	2.11707e-06	5	0.000156555	4	0	1
KGD2	S000002555	YDR148C	Dihydrolipoyl transsuccinylase	5	V	6.15762e-05	28	0.000320357	91	0.00109515	40	0.000161149	11
NUM1	S000002557	YDR150W	Protein required for nuclear migration	22	V	0.000151628	23	0.00027484	95	0.000566448	43	0.00127082	18
CTH1	S000002558	YDR151C	Member of the CCCH zinc finger family	7	V	8.42499e-06	5	5.63905e-05	21	3.86859e-05	4	0	1
GIR2	S000002559	YDR152W	Highly-acidic RWD domain-containing protein of unknown function	3	V	2.1981e-05	15	0.000110081	151	0.000243634	29	2.61449e-05	5
ENT5	S000002560	YDR153C	Protein containing an N-terminal epsin-like domain	4	V	3.02366e-05	20	1.74018e-05	28	7.88923e-05	18	0.000493957	10
CPR1	S000002562	YDR155C	Cytoplasmic peptidyl-prolyl cis-trans isomerase (cyclophilin)	19	V	0.000869922	47	0.000337167	83	0.000672637	38	8.45277e-05	9
RPA14	S000002563	YDR156W	RNA polymerase I subunit A14	5	V	3.35536e-05	17	0.000260624	130	0.000440716	81	8.50106e-06	14
HOM2	S000002565	YDR158W	Aspartic beta semi-aldehyde dehydrogenase	9	V	4.38079e-05	16	0.000537924	122	0.000540756	34	0.000986344	9
SAC3	S000002566	YDR159W	Nuclear pore-associated protein	24	V	0.00028744	65	0.000818276	201	0.00192259	117	0.00507716	62
SSY1	S000002567	YDR160W	Component of the SPS plasma membrane amino acid sensor system	35	E	2.89202e-05	4	0.000421961	63	0.000659169	24	0.000545493	7
YDR161W	S000002568	YDR161W	Putative protein of unknown function	0	V	8.12308e-06	11	9.66882e-05	322	3.1768e-05	188	1.52388e-06	63
NBP2	S000002569	YDR162C	Protein involved in the HOG (high osmolarity glycerol) pathway	8	V	0.000258029	33	0.000689499	136	0.000623028	36	0.000984602	13
CWC15	S000002570	YDR163W	Non-essential protein involved in pre-mRNA splicing	0	V	2.18639e-05	12	2.26096e-05	19	2.71748e-06	9	0	7
SEC1	S000002571	YDR164C	Sm-like protein involved in docking and fusion of exocytic vesicles	104	E	1.3729e-05	19	0.000100203	67	0.000649864	45	0.0017781	22
TRM82	S000002572	YDR165W	Catalytic subunit of a tRNA methyltransferase complex	5	V	9.50039e-06	5	0.000222961	430	0.0010505	276	0.000310441	117
SEC5	S000002573	YDR166C	Essential 107kDa subunit of the exocyst complex	16	E	0.000282187	20	6.43351e-05	46	0.000629863	34	4.16196e-05	14
TAF10	S000002574	YDR167W	Subunit (145 kDa) of TFIID and SAGA complexes	7	E	0.000205683	60	0.000291914	131	0.000984466	93	0.000806313	51
CDC37	S000002575	YDR168W	Essential Hsp90p co-chaperone	38	E	0.000159705	31	0.00019565	96	0.00159299	78	0.00101963	19
STB3	S000002576	YDR169C	Ribosomal RNA processing element (RRPE)-binding protein	5	V	4.40216e-05	20	6.6602e-05	21	3.64844e-05	11	3.15601e-06	2
SEC7	S000002577	YDR170C	Guanine nucleotide exchange factor (GEF) for ADP ribosylation factors	77	E	0.000494998	49	0.000214752	81	0.00191977	48	0.0025916	13
HSP42	S000002578	YDR171W	Small heat shock protein (sHSP) with chaperone activity	13	V	0.000253655	52	0.00106474	249	0.00375103	108	0.00546559	29
SUP35	S000002579	YDR172W	Translation termination factor eRF3	319	E	0.00109186	72	0.00125826	258	0.00258489	86	0.00374162	27
ARG82	S000002580	YDR173C	Inositol polyphosphate multikinase (IPMK)	22	V	0.000130805	7	3.50426e-05	25	9.39468e-05	13	0.000103813	6
HMO1	S000002581	YDR174W	Chromatin associated high mobility group (HMG) family member	19	V	0.000638618	95	0.000594482	152	0.0019915	76	0.00136607	15
RSM24	S000002582	YDR175C	Mitochondrial ribosomal protein of the small subunit	1	V	1.12864e-05	36	0.000132168	69	0.000166566	35	0.00151352	32
NGG1	S000002583	YDR176W	Transcriptional regulator involved in glucose repression	30	V	0.000423118	48	0.000132359	92	0.00132291	57	0.00109834	31
UBC1	S000002584	YDR177W	Ubiquitin-conjugating enzyme	34	E	1.55176e-05	10	6.52334e-05	39	0.000105106	17	0	3
SDH4	S000002585	YDR178W	Membrane anchor subunit of succinate dehydrogenase	11	V	7.44016e-05	6	0.000581667	184	0.00104413	62	0.00115445	26
CSN9	S000002586	YDR179C	Subunit of the Cop9 signalosome	1	V	2.81591e-05	20	2.36868e-05	23	5.20624e-05	13	8.39535e-05	9
YDR179W-A	S000002587	YDR179W-A	Putative protein of unknown function	0	V	0	1	1.20594e-06	3	0	1
SCC2	S000002588	YDR180W	Subunit of cohesin loading factor (Scc2p-Scc4p)	21	E	3.63045e-05	9	4.02685e-05	41	8.01451e-06	18	0.000132362	7
SAS4	S000002589	YDR181C	Subunit of the SAS complex	6	V	5.01725e-05	10	1.56091e-05	21	3.30097e-05	12	0	4
[truncated: 3,299 more rows]
