# Supplementary material for: Linkers of Cell Polarity and Cell Cycle Regulation in the Fission Yeast Protein Interaction Network
Source: PLoS Comput Biol. 2012 Oct 18;8(10):e1002732. doi: 10.1371/journal.pcbi.1002732 (PMC3475659; doi:10.1371/journal.pcbi.1002732)
Supplement: Table S4 — Analysis of the core budding yeast network. Tabulated file (in .xls format) containing network measures for all protein in the core network of fission (S3) and budding (S4) yeast. Columns include: Common name: Common name. Systematic name: Systematic name (for fission yeast), GO database ID (for budding yeast) Description: Brief description of known protein activity. PubMed count: Number of abstracts discussing that particular protein in fission yeast available in PubMed. Lethality: E (Essential) If deletion of the gene causes lethality, V (Viable) otherwise. GO Categories: Which of the three categories (Cytokinesis (CY), Polarity (P), Cell Cycle (CC)) does the protein belong too? Scores: Betweenness Centrality and Degree scores and ranks for all the sub-networks the protein belongs to, as well as the core network. In the sub-network, betweenness rank (Ranksub-network) is calculated by ranking all the proteins from highest to lowest according to their betweenness. In the core network, the betweenness rank (Rankcore) is calculated only between proteins that are found in the original sub-network. To avoid artifacts due to the presence of multiple proteins with 0 betweenness, we assign consecutive proteins with the exact same score have the same rank, which is simply defined as the average of their ranking [109]. For example: in a network of 6 proteins [A, B, C, D, E, F], with BC values of [10, 10, 7, 5, 5, 5], the ranking would be: [(A, 1.5), (B, 1.5), (C, 3), (D, 5), (E, 5), (F, 5)] Linkerity: Linkerity calculated for all the categories as given in Equation 1. Note that the linkerity for a protein that doesn't shift in rank is 1 by definition. (XLS) [file pcbi.1002732.s010.xls]

## Sheet: Sheet1
Common name	Systematic name	Other names	Description	PubMed	Lethality	GO categories	Linkerity			Polarity			Cytokinesis			Cell cycle			Core					Number of Interactions with proteins in GO category
				count	Essential - Viable	Cell Cycle, Polarity,	Polarity	Cytokinesis	Cell Cycle	BC		Degree	BC		Degree	BC		Degree	BC				Degree
						Cytokinesis				score	rank		score	rank		score	rank		score	rank P	rank CY	rank CC		Cell cycle	Cytokinesis	Polarity
TPD3	S000000014	FUN32, YAL016W	Regulatory subunit A of the protein phosphatase 2A (PP2A) complex	18	V	CC			1.05634							0.000595724	150	11	0.000632199			142	12	11	1	4
CCR4	S000000019	YAL021C, FUN27, NUT21	Component of the CCR4-NOT transcriptional complex	95	V	CC			0.405797							0.0134013	28	15	0.00418545			69	17	15	4	3
LTE1	S000000022	YAL024C, MSI2	Protein similar to GDP/GTP exchange factors but no detectable activity	46	V	CC			1.41176							0.0166065	24	29	0.0169207			17	33	29	8	10
CLN3	S000000038	YAL040C, FUN10, DAF1, WHI1	G1 cyclin involved in cell cycle progression	200	V	CC			0.64							0.0232809	16	24	0.0111245			25	26	24	2	6
CDC24	S000000039	YAL041W, CLS4	Guanine nucleotide exchange factor for Cdc42p	105	E	CC, P	1.42857		2.51351	0.0147756	30	23				0.00343202	93	16	0.00798257	21		37	32	16	11	23
SPC72	S000000045	YAL047C, LDB4	Component of the cytoplasmic Tub4p (gamma-tubulin) complex	15	V	CC			0.9875							0.000453418	158	6	0.000285053			160	8	6	0	2
BUD14	S000000069	YAR014C	Protein involved in bud-site selection	6	V	P	0.989474			0.00145584	94	5							0.00103363	95			11	8	2	5
CDC15	S000000072	LYT1, YAR019C	Protein kinase of the Mitotic Exit Network	84	E	CC, CY		1.2	1.51724				0.0450975	18	10	0.00899975	44	27	0.00921255		15	29	33	27	10	6
SWH1	S000000081	OSH1, YAR044W, YAR042W	Protein similar to mammalian oxysterol-binding protein	9	V	P	1.03509			0.00728293	59	3							0.00343632	57			4	1	1	3
FUS3	S000000112	DAC2, YBL016W	Mitogen-activated serine/threonine protein kinase involved in mating	173	V	CC			1.04286							0.00570733	73	10	0.0041546			70	16	10	3	6
PSY4	S000000142	YBL046W	Regulatory subunit of protein phosphatase PP4	4	V	CC			0.989218							0	183.5	2	0			185.5	2	2	0	0
PIN4	S000000147	YBL051C, MDT1	Protein involved in G2/M phase progression and response to DNA damage	5	V	CC			0.810526							0.0049644	77	7	0.00237441			95	9	7	1	1
PTC3	S000000152	YBL056W	Type 2C protein phosphatase (PP2C)	13	V	CC			1.04857							0	183.5	3	2.12209e-05			175	4	3	1	1
SKT5	S000000157	CHS4, CAL2, YBL061C, CSD4	Activator of Chs3p (chitin synthase III)	22	V	CY		0.916667					0.001745	66	5				0.00065911		72		9	3	5	4
BOI1	S000000181	YBL085W, GIN7, BOB1	Protein implicated in polar growth	22	V	CY, P	1.47619	0.852941		0.00690596	62	12	0.0248027	29	5				0.00488951	42	34		16	6	5	12
HHT1	S000000214	BUR5, YBR010W, SIN2	Histone H3	8	V	CC			0.507937							0.0129426	32	20	0.00452398			63	20	20	1	0
CHS3	S000000227	CSD2, CAL1, YBR023C, KTI2, DIT101	Chitin synthase III	75	V	CY		0.58209					0.0155513	39	8				0.00109108		67		10	2	8	5
CHS2	S000000242	YBR038W	Chitin synthase II	35	E	CY		0.917647					0.000139053	78	2				0.000152109		85		3	1	2	0
FIG1	S000000244	YBR040W	Integral membrane protein required for efficient mating	5	V	P	0.966912			0	131.5	1							0	136			1	0	0	1
MMS4	S000000302	YBR098W, SLX2, YBR100W	Subunit of the structure-specific Mms4p-Mus81p endonuclease	39	V	CC			1.31818							0.00756055	58	11	0.00657954			44	11	11	0	1
SIF2	S000000307	EMB1, YBR103W	Subunit of the Set3C histone deacetylase complex	3	V	CC			2.9902							0.000580742	152.5	12	0.00596176			51	14	12	1	3
HSL7	S000000337	YBR133C	Protein arginine N-methyltransferase	23	V	CC			0.909091							0.0022362	110	11	0.00119955			121	12	11	4	4
CKS1	S000000339	YBR135W	Cyclin-dependent protein kinase regulatory subunit and adaptor	25	E	CC			0.787879							0.00250898	104	18	0.000787873			132	18	18	0	1
MEC1	S000000340	YBR136W, RAD31, SAD3, ESR1	Genome integrity checkpoint protein and PI kinase superfamily member	358	E	CC			0.5							0.0708888	2	41	0.0350364			4	44	41	2	2
SUP45	S000000347	SUP1, SUP47, YBR143C, SAL4	Polypeptide release factor (eRF1) in translation termination	90	E	CY		2.28125					0.000785625	73	2				0.0049201		32		9	4	2	3
SLI15	S000000360	YBR156C	Subunit of the conserved chromosomal passenger complex (CPC)	20	V	CY		1.12963					0	91.5	2				0.000288955		81		7	7	2	0
AMN1	S000000362	ICS4, CST13, YBR158W	Protein required for daughter cell separation	12	V	CC			9.375							0.00532672	75	17	0.0285822			8	24	17	9	1
CDC28	S000000364	YBR160W, CDK1, SRM5, HSL5	Catalytic subunit of the main cell cycle cyclin-dependent kinase (CDK)	709	E	CC			1							0.176385	1	76	0.156892			1	109	76	23	40
PCH2	S000000390	YBR186W	Nucleolar component of the pachytene checkpoint	14	V	CC			0.909722							0.0012699	131	5	0.000586664			144	5	5	0	0
BEM1	S000000404	YBR200W, SRO1	Protein containing SH3-domains	63	V	P	0.857143			0.0600829	6	33							0.0218224	7			42	13	24	33
ERV15	S000000414	YBR210W	Protein involved in export of proteins from the endoplasmic reticulum	2	V	CY, P	0.966912	0.943299		0	131.5	1	0	91.5	1				0	136	97		1	0	1	1
SDS24	S000000418	YBR214W	Homolog of S. pombe Sds23 protein	2	V	CY													0.000128907				2	1	1	0
CHK1	S000000478	YBR274W	Serine/threonine kinase and DNA damage checkpoint effector	71	V	CC			0.865672							0.00185454	116	15	0.000754317			134	15	15	0	0
PPS1	S000000480	YBR276C	Protein phosphatase with specificity for serine	3	V	CC
BUD3	S000000520	YCL014W, YCL012W	Protein involved in bud-site selection and axial budding patterning	22	V	CY, P	2.87879	2.28		0.00134654	95	7	0.00451087	57	7				0.00597773	33	25		15	8	7	7
KCC4	S000000529	YCL024W	Protein kinase of the bud neck involved in the septin checkpoint	11	V	CC, CY, P	0.963303	1	1	0.000576424	105	7	0.00011544	79	8	0.000507007	157	6	0.000307835	109	79	157	12	6	8	7
FUS1	S000000532	YCL027W	Membrane protein localized to the shmoo tip	112	V	P	1.3			0.0297782	13	12							0.0156081	10			18	7	7	12
STE50	S000000537	YCL032W	Protein involved in mating response	34	V	CC			0.534247							0.0106778	39	6	0.00404863			73	14	6	6	11
MRC1	S000000566	YCL061C, YCL060C	S-phase checkpoint protein required for DNA replication	61	V	CC			0.808824							0.0079004	55	21	0.0042273			68	23	21	1	2
CDC10	S000000595	YCR002C	Component of the septin ring that is required for cytokinesis	69	V	CY, P	1.06977	1.14286		0.0116649	46	14	0.0149066	40	16				0.00488755	43	35		24	9	16	14
SNT1	S000000629	YCR033W	Subunit of the Set3C deacetylase complex	2	V	CC			0.996732							0.000580742	152.5	12	0.000359518			153	13	12	0	2
BUD5	S000000634	YCR038C	GTP/GDP exchange factor for Rsr1p (Bud1p)	26	V	CY, P	0.346154	0.692308		0.0236203	18	13	0.0285249	27	9				0.00389411	52	39		13	4	9	13
BUD23	S000000643	YCR047C	Methyltransferase	3	V	CY, P	0.966912	0.943299		0	131.5	2	0	91.5	2				0	136	97		2	0	2	2
PWP2	S000000653	YCR057C, YCR058C, YCR055C, UTP1	Conserved 90S pre-ribosomal component	8	E	CY, P	0.889706	0.961905		0.00714211	60.5	3	0.00989899	50.5	4				0.00279325	68	52.5		5	1	4	3
BUD31	S000000659	YCR063W, CWC14	Component of the SF3b subcomplex of the U2 snRNP	2	V	CY, P
FIG2	S000000685	YCR089W	Cell wall adhesin	7	V	P	0.918919			0.0143885	34	3							0.00560224	37			3	0	0	3
CDC39	S000000689	SMD6, NOT1, ROS1, YCR093W	Component of the CCR4-NOT transcriptional complex	40	E	CC			1.07419							0.000113349	166.5	5	0.000352424			155	7	5	0	2
BUD16	S000000755	YEL029C	Putative pyridoxal kinase	1	V	CY, P													0.00560224				2	1	1	1
SEC3	S000000810	PSL1, YER008C	Subunit of the exocyst complex	33	E	CY, P	2.16129	1		0.00656805	67	15	0.0351328	22	10				0.00610925	31	22		20	5	10	15
BIM1	S000000818	YER016W, YEB1, EB1	Microtubule-binding protein	39	V	CC			0.846154							0.0121126	33	19	0.00770083			39	27	19	4	9
PCL6	S000000861	YER059W	Pho85p cyclin of the Pho80p subfamily	6	V	CC			0.721519							0.00200565	114	8	0.00030152			158	9	8	0	2
DOT6	S000000890	YER088C, PBF2	Protein involved in rRNA and ribosome biogenesis	4	V	P													0				8	8	0	0
PTC2	S000000891	YER089C	Type 2C protein phosphatase (PP2C)	20	V	CC			0.734694							0.00233475	108	8	0.000553186			147	9	8	1	1
TSC11	S000000895	YER093C, AVO3	Subunit of TORC2 (Tor2p-Lst8p-Avo1-Avo2-Tsc11p-Bit61p)	4	E	P	0.7875			0.00689983	63	12							0.00184045	80			14	2	2	12
BOI2	S000000916	YER114C, BEB1	Protein implicated in polar growth	7	V	CY, P	0.942857	1.07273		0.00662683	66	11	0.00414361	59	3				0.00254653	70	55		13	4	3	11
SHO1	S000000920	YER118C, SSU81	Transmembrane osmosensor for filamentous growth and HOG pathways	46	V	P	0.433962			0.0188432	23	12							0.00383998	53			14	4	7	12
DSE1	S000000926	YER124C	Daughter cell-specific protein	6	V	CY		0.588235					0.0232621	30	9				0.00281233		51		11	2	9	3
GLC7	S000000935	YER133W, DIS2, DIS2S1, PP1, CID1	Type 1 serine/threonine protein phosphatase catalytic subunit	162	E	CC, P	9		0.8	0.0119729	45	12				0.0378874	8	25	0.0260198	5		10	38	25	6	12
PEA2	S000000951	YER149C, PPF2, DFG9	Coiled-coil polarisome protein required for polarized morphogenesis	12	V	CY, P	0.610169	1.22727		0.0143653	36	13	0.0070092	54	9				0.00334911	59	44		15	5	9	13
BEM2	S000000957	IPL2, SUP9, TSL1, YER155C	Rho GTPase activating protein (RhoGAP)	43	V	P	0.875			0.0542253	7	28							0.0206722	8			38	12	13	28
DNF1	S000000968	YER166W	Plasma membrane aminophospholipid translocase (flippase)	16	V	P	0.278261			0.0147272	32	3							0.000194167	115			3	0	1	3
BCK2	S000000969	YER167W, CTR7	Serine/threonine-rich protein involved in PKC1 signaling	12	V	CC			0.464286							0.0244937	13	20	0.00973586			28	23	20	3	7
RAD24	S000000975	RS1, YER173W	Checkpoint protein	107	V	CC			0.447368							0.0211522	17	29	0.00770851			38	29	29	1	0
BMH1	S000000979	YER177W, APR6	14-3-3 protein	48	V	CC			1.35714							0.0187164	19	24	0.0198149			14	34	24	10	14
STE20	S000000999	YHL007C	Cdc42p-activated signal transducing kinase of the PAK family	135	V	CC, CY, P	1.77778	1.16667	4.46667	0.0249471	16	18	0.0664855	7	11	0.00611728	67	21	0.0176484	9	6	15	36	21	11	18
RIM101	S000001019	RIM1, YHL027W	Transcriptional repressor involved in response to pH	51	V	CY		0.866667					0.00217751	65	3				0.000414447		75		5	2	3	1
OSH7	S000001043	YHR001W	Member of an oxysterol-binding protein family	4	V	P	0.914729			8.6887e-05	118	2							1.95699e-05	129			2	0	0	2
SPO13	S000001056	YHR014W	Meiosis-specific protein	67	V	CC			0.5625							0.0142072	27	15	0.00625778			48	15	15	1	1
MYO1	S000001065	YHR023W	Type II myosin heavy chain	39	E	CY		1.2					0.0670108	6	20				0.0192081		5		37	12	20	15
SLT2	S000001072	YHR030C, SLK2, BYC2, MPK1	Serine/threonine MAP kinase	203	V	CY		7.66667					0.0344264	23	13				0.0326161		3		46	25	13	24
GIC1	S000001103	YHR061C	Protein of unknown function involved in budding and cell polarization	14	V	CC, CY, P	1.38462	1.26667	0.963636	0.0102234	54	21	0.0159296	38	12	0.00802334	53	20	0.00559573	39	30	55	34	20	12	21
PCL5	S000001113	YHR071W	Cyclin	8	V	CC			0.467153							0.00656478	64	9	0.000656652			137	11	9	0	3
OSH3	S000001115	YHR073W	Member of an oxysterol-binding protein family	7	V	P	1.19388			9.96745e-05	117	3							0.000867048	98			5	3	0	3
KIC1	S000001144	NRK1, YHR102W	Protein kinase of the PAK/Ste20 family, required for cell integrity	7	E	P	0.698925			0.00663767	65	6							0.00117084	93			8	0	5	6
CDC12	S000001149	YHR107C, CLA10, PSL7	Component of the septin ring that is required for cytokinesis	67	E	CY, P	1.11111	1.71429		0.0233318	20	22	0.0342454	24	21				0.0100785	18	14		40	20	21	22
DMA1	S000001157	CHF1, YHR115C	Protein involved in ubiquitin ligation	6	V	CC, P	1.67188		1	0.00048195	107	6				0.00447555	85	6	0.00310019	64		85	9	6	2	6
ARP1	S000001171	YHR129C, ACT5	Actin-related protein of the dynactin complex	17	V	P	0.829545			0.0043881	73	8							0.00131095	88			16	8	3	8
YCK1	S000001177	YHR135C, CKI2	Palmitoylated plasma membrane-bound casein kinase I isoform	28	V	CY, P		1.45238					0	91.5	1				0.00149003		63		8	7	1	1
DSE2	S000001186	YHR143W	Daughter cell-specific secreted protein with similarity to glucanases	6	V	CY		0.835526					0.00259117	63.5	7				0.000391878		76		9	2	7	1
SPO12	S000001195	YHR152W	Nucleolar protein of unknown function	29	V	CC			1.68889							0.00504339	76	16	0.00634937			45	21	16	4	7
SPO16	S000001196	YHR153C	Meiosis-specific protein involved in synaptonemal complex assembly	6	V	CC
KEL1	S000001201	YHR158C	Protein required for proper cell fusion and cell morphology	5	V	CC, P	1.24359		1.20192	0.00115885	97	5				0.00144942	125	9	0.00197902	78		104	14	9	2	5
CDC23	S000001209	YHR166C	Subunit of the Anaphase-Promoting Complex/Cyclosome (APC/C)	33	E	CC			1.45455							0.00863193	48	25	0.0085366			33	26	25	3	0
ULP2	S000001293	SMT4, YIL031W	Peptidase that deconjugates Smt3/SUMO-1 peptides from proteins	20	E	CC			0.953947							0.000717166	145	5	0.000375977			152	5	5	1	0
GVP36	S000001303	YIL041W	BAR domain-containing protein that localizes to Golgi vesicles	3	V	P													0.000131551				2	2	0	0
PCL7	S000001312	YIL050W	Pho85p cyclin of the Pho80p subfamily	6	V	CC			0.833333							0.000874154	140	3	0.000148421			168	4	3	0	2
SEC6	S000001330	YIL068C	Essential 88kDa subunit of the exocyst complex	50	E	CY, P	0.886179	1.03977		0.000469037	109	9	0	91.5	7				8.21527e-05	123	88		9	0	7	9
HOP1	S000001334	YIL072W	Meiosis-specific DNA binding protein	65	V	CC			0.962963							0.00127846	130	5	0.000693195			135	5	5	0	0
SPO22	S000001335	YIL073C, ZIP4	Meiosis-specific protein essential for chromosome synapsis	9	V	CC
PRK1	S000001357	YIL095W, PAK1	Protein serine/threonine kinase	48	V	CY		0.824561					0.0120292	47	8				0.00230954		57		12	3	8	9
SLM1	S000001367	YIL105C, LIT2	Phosphoinositide PI4,5P(2) binding protein	15	V	P	1.66667			0.00217071	85	10							0.00390407	51			14	5	2	10
MOB1	S000001368	YIL106W	Component of the mitotic exit network	24	E	CC			3.45161							0.00234632	107	16	0.0091095			31	23	16	10	1
HOS4	S000001374	YIL112W	Subunit of the Set3 complex	1	V	CC			0.847619							0.00385308	89	10	0.00196922			105	10	10	1	2
RHO3	S000001380	YIL118W	GTPase of the Rho/Rac subfamily of Ras-like proteins	35	E	P	0.44			0.0218909	22	20							0.00409238	50			22	2	13	20
TAO3	S000001391	YIL129C, PAG1	Component of the RAM signaling network	8	E	P	1.26442			0	131.5	4							0.000440806	104			7	0	6	4
TPM2	S000001400	YIL138C	Minor isoform of tropomyosin	7	V	P	0.916031			7.65044e-05	120	4							5.04551e-06	131			4	1	3	4
AXL2	S000001402	YIL140W, SRO4, BUD10	Integral plasma membrane protein required for axial budding	11	V	CY, P	1	1.25		0.0413012	11	14	0.0594	10	12				0.0151635	11	8		18	9	12	14
PAN1	S000001445	DIM2, MIP3, YIR006C, MDP3	Part of actin cytoskeleton-regulatory complex Pan1p-Sla1p-End3p, asso	38	E	CY, P	0.852941	1.69231		0.01501	29	10	0.0134995	44	10				0.00571465	34	26		13	2	10	10
MND2	S000001464	YIR025W	Subunit of the Anaphase-Promoting Complex/Cyclosome (APC/C)	7	V	CC			1.21429							6.91018e-05	170	6	0.000648418			140	8	6	1	1
ELM1	S000001531	LDB9, YKL048C	Serine/threonine protein kinase that regulates cellular morphogenesis	40	V	CC, CY, P	1.57778	2.05405	0.741935	0.00566989	71	9	0.00031047	76	6	0.00880726	46	22	0.00458566	45	37	62	28	22	6	9
BUD2	S000001575	ERC25, YKL092C, CLA2	GTPase activating factor for Rsr1p/Bud1p	15	V	CY, P	0.950413	0.837209		0.000143551	115	7	0.000860572	72	5				0.000135799	121	86		9	5	5	7
HSL1	S000001584	ELM2, NIK1, YKL101W	Protein kinase that regulates the morphogenesis and septin checkpoints	54	V	CC, CY		1.55	0.746667				0.00308992	62	11	0.00788648	56	20	0.00385453		40	75	26	20	11	8
SLD2	S000001591	DRC1, YKL108W	Single-stranded DNA origin-binding and annealing protein	25	E	CC			0.945122							0.000535571	155	5	0.000259371			164	5	5	0	0
MYO3	S000001612	YKL129C	One of two type I myosins	19	V	CY, P	0.940476	0.90625		0.00249462	79	9	0.00447711	58	8				0.00148876	84	64		11	3	8	9
ASH1	S000001668	YKL185W	Zinc-finger inhibitor of HO transcription	77	V	CC			1.34286							0.00866382	47	12	0.00835551			35	16	12	2	3
HYM1	S000001672	YKL189W	Component of the RAM signaling network	8	E	CY, P	0.918033	1.73913		0.0091151	56	7	6.73401e-05	80	4				0.00331042	61	46		11	2	4	7
TOR2	S000001686	YKL203C, DRR2	PIK-related protein kinase and rapamycin target	82	E	CC, P	0.85		4.8	0.0245784	17	18				0.000741679	144	5	0.00911759	20		30	23	5	4	18
OSH6	S000001711	YKR003W	Member of an oxysterol-binding protein family with overlapping	0	V	P	0.875			0.0109362	49	3							0.00362241	56			3	1	0	3
SET3	S000001737	YKR029C	Defining member of the SET3 histone deacetylase complex	11	V	CC			0.909774							0.00173137	121	14	0.000775672			133	15	14	0	2
SPO14	S000001739	YKR031C, PLD1	Phospholipase D	33	V	P	0.966912			0	131.5	2							0	136			2	1	0	2
UTH1	S000001750	YKR042W	Mitochondrial outer membrane and cell wall localized SUN family member	12	V	CY		0.943299					0	91.5	1				0		97		1	0	1	0
DYN1	S000001762	DHC1, PAC6, YKR054C	Cytoplasmic heavy chain dynein	16	V	P	1.42857			0.0137137	40	13							0.00658939	28			29	19	6	13
RHO4	S000001763	YKR055W	Non-essential small GTPase of the Rho/Rac family of Ras-like proteins	17	V	P	0.695122			0.00803841	57	16							0.00156382	82			17	1	7	16
SIS2	S000001780	HAL3, YKR072C	Regulatory subunit of protein phosphatase 1 Ppz1p and subunit of PPCDC	26	V	CC			1.15862							0.000111581	168	3	0.00056484			145	4	3	1	1
PXL1	S000001798	YKR090W	LIM domain-containing protein that localizes to polarized growth sites	3	V	P	0.85			0.000791999	102	3							0.000148514	120			4	2	0	3
ACT1	S000001855	ABY1, END7, YFL039C	Actin	151	E	CY, P	1.5	4		0.0993856	3	30	0.0959275	4	20				0.0404905	2	1		45	11	20	30
MOB2	S000001859	YFL034C-B, YFL035C-A, YFL035C	Activator of Cbk1p kinase	12	E	CY, P	1.24057	1.17308		0	131.5	4	0	91.5	3				0.000362128	106	78		6	1	3	4
RIM15	S000001861	TAK1, YFL033C	Protein kinase involved in cell proliferation in response to nutrients	35	V	CC			0.655738							0.00483942	80	5	0.00101211			122	6	5	0	1
SEC4	S000001889	SRO6, YFL005W	Rab family GTPase essential for exocytic secretion and autophagy	109	E	CY, P	0.833333	1.33333		0.010713	50	16	0.00339497	60	9				0.00332366	60	45		19	3	9	16
ECO1	S000001923	CTF7, YFR027W	Acetyltransferase required for sister chromatid cohesion	47	E	CC			1							0.00138699	128	4	0.000898193			128	4	4	1	0
CDC14	S000001924	OAF3, YFR028C	Protein phosphatase required for mitotic exit	195	E	CC			1.54167							0.0112476	37	28	0.0118801			24	36	28	11	6
CDC26	S000001932	HIT3, YFR036W, SCD26	Subunit of the Anaphase-Promoting Complex/Cyclosome (APC/C)	9	V	CC			1.00901							0.00208182	112	16	0.00159173			111	17	16	1	0
CDC7	S000002175	LSD6, SAS1, YDL017W	DDK (Dbf4-dependent kinase) catalytic subunit	162	E	CC			2.34783							0.00798811	54	12	0.0120454			23	15	12	3	2
OSH2	S000002177	YDL019C	Member of an oxysterol-binding protein family	5	V	P	0.82243			0.00207232	88	6							0.000360506	107			6	1	3	6
MPS1	S000002186	RPK1, YDL028C	Dual-specificity kinase	43	E	CC			0.864198							0.00590195	70	22	0.00345234			81	23	22	1	2
BRE1	S000002232	YDL074C	E3 ubiquitin ligase	39	V	CC			0.848214							0.0033802	95	8	0.00147452			112	8	8	0	0
DUN1	S000002259	YDL101C	Cell-cycle checkpoint serine-threonine kinase	80	V	CC			0.733333							0.00395799	88	17	0.00122695			120	17	17	0	0
POL3	S000002260	YDL102W, TEX1, CDC2, HPR6	Catalytic subunit of DNA polymerase delta	395	E	CC			0.827586							0.00583016	72	10	0.00299953			87	10	10	0	0
CYK3	S000002275	YDL117W	SH3-domain protein located in the mother-bud neck and the actin ring	6	V	CY		0.943662					0.00165585	67	7				0.000727217		71		11	4	7	1
PCL2	S000002285	YDL127W, CLN4	Cyclin	21	V	CC, P	1.16279		1.09735	0.000894657	100	9				0.00148022	124	8	0.00140327	86		113	16	8	5	9
PPH21	S000002292	PPH1, YDL134C	Catalytic subunit of protein phosphatase 2A (PP2A)	20	V	CC			1.18868							0.00667181	63	18	0.00577168			53	21	18	0	6
CLB3	S000002314	YDL155W	B-type cyclin involved in cell cycle progression	31	V	CC			1.11321							0.00184795	118	18	0.00192019			106	20	18	3	2
DHH1	S000002319	YDL160C	Cytoplasmic DExD/H-box helicase, stimulates mRNA decapping	34	V	P	2.14815			0.000126886	116	3							0.00381891	54			12	10	2	3
CDC36	S000002324	DNA19, YDL165W, NOT2	Component of the CCR4-NOT transcriptional complex	30	E	CC			1.00301							0.000113349	166.5	5	0.000225976			166	6	5	0	1
PCL9	S000002338	YDL179W	Cyclin	6	V	CC, P	2.98864		0.633333	0	131.5	2				0.0112047	38	14	0.00481904	44		60	17	14	1	2
PPH22	S000002347	YDL188C, PPH2	Catalytic subunit of protein phosphatase 2A (PP2A)	23	V	CC			0.96748							0.00180878	119	13	0.000987844			123	14	13	0	3
SNF3	S000002353	YDL194W	Plasma membrane low glucose sensor that regulates glucose transport	84	V	CC			0.989218							0	183.5	1	0			185.5	2	1	1	1
HBT1	S000002382	YDL223C	Substrate of the Hub1p ubiquitin-like protein	1	V	P	0.966912			0	131.5	1							0	136			1	0	0	1
SHS1	S000002384	YDL225W, SEP7	Component of the septin ring that is required for cytokinesis	22	V	CY		1					0.0104272	49	15				0.00292619		49		23	11	15	11
DBF4	S000002459	LSD7, YDR052C, DNA52	Regulatory subunit of Cdc7p-Dbf4p kinase complex	89	E	CC			0.851351							0.00139389	126	11	0.000538384			148	11	11	0	0
PPH3	S000002482	YDR075W	Catalytic subunit of protein phosphatase PP4 complex	27	V	CC			0.456522							0.0172551	21	18	0.00626006			46	19	18	0	2
AFR1	S000002492	YDR085C	Protein required for pheromone-induced projection (shmoo) formation	12	V	P	0.891892			0.00092797	99	4							0.000249053	111			5	1	4	4
DNF2	S000002500	YDR093W	Plasma membrane aminophospholipid translocase (flippase)	13	V	P	1.42935			0	131.5	1							0.00121511	92			2	1	0	1
BMH2	S000002506	SCD3, YDR099W	14-3-3 protein	45	V	CC			1.36842							0.00492123	78	14	0.00548462			57	22	14	10	9
SWF1	S000002533	YDR126W, PSL10	Palmitoyltransferase that acts on transmembrane proteins	1	V	P	1.052			0	131.5	1							4.08121e-05	125			2	2	0	1
SAC6	S000002536	YDR129C, ABP67	Fimbrin	31	V	CY, P	1.0274	0.706897		0.0033662	75	8	0.0139629	41	8				0.00223354	73	58		12	1	8	8
FIN1	S000002537	YDR130C	Spindle pole body-related intermediate filament protein	7	V	CC			1.02941							0.00247777	105	14	0.00211563			102	19	14	2	6
DOP1	S000002548	YDR141C	Golgi-localized, leucine-zipper domain containing protein	3	E	P
CPR1	S000002562	CPH1, CYP1, YDR155C	Cytoplasmic peptidyl-prolyl cis-trans isomerase (cyclophilin)	66	V	CC			1.2439							0.00813009	51	12	0.00743972			41	14	12	1	3
SEC5	S000002573	YDR166C	Essential 107kDa subunit of the exocyst complex	16	E	CY, P	0.771429	0.902597		0.0023239	81	13	0.00125485	69.5	8				0.000381797	105	77		13	1	8	13
CDC37	S000002575	YDR168W, SMO1	Essential Hsp90p co-chaperone	40	E	CC			0.852459							0.00812843	52	16	0.00468018			61	19	16	5	6
ATC1	S000002592	LIC4, YDR184C	Nuclear protein	2	V	CY, P	0.37037	1.25		0.0425399	10	3	0.0334314	25	5				0.0066159	27	20		8	4	5	3
UME6	S000002615	RIM16, NIM2, YDR207C, CAR80	Key transcriptional regulator of early meiotic genes	57	V	CC			0.746154							0.00298029	97	11	0.00087632			130	12	11	0	1
RAD9	S000002625	YDR217C	DNA damage-dependent checkpoint protein	274	V	CC			0.576923							0.0235525	15	33	0.0110653			26	34	33	1	0
MNN10	S000002653	BED1, YDR245W, REC41, SLC2	Subunit of a Golgi mannosyltransferase complex	20	V	CY		0.855556					0.000248465	77	2				3.41598e-05		90		3	0	2	2
MET32	S000002661	YDR253C	Zinc-finger DNA-binding protein	10	V	CC			0.989218							0	183.5	1	0			185.5	1	1	0	0
SWM1	S000002668	APC13, YDR260C	Subunit of the anaphase-promoting complex	8	V	CC			0.953488							0.00156773	123	17	0.000885049			129	18	17	2	0
GCN2	S000002691	YDR283C, AAS1, AAS102, NDR2	Protein kinase	124	V	CC			1.18382							0.000289097	161	3	0.000677451			136	5	3	2	2
RSC3	S000002711	YDR303C	Component of the RSC chromatin remodeling complex	6	E	CC			0.834783							0.00325321	96	3	0.00136289			115	3	3	0	0
GIC2	S000002717	YDR309C	Redundant rho-like GTPase Cdc42p effector	19	V	CC, CY, P	0.6	0.516129	1.44828	0.0176591	24	22	0.0479908	16	15	0.00468069	84	15	0.00531057	40	31	58	31	15	15	22
SKP1	S000002736	MGO1, CBF3D, YDR328C	Kinetochore protein that is part of multiple protein complexes	110	E	CC, CY		4.35714	1.40816				0	91.5	1	0.0059936	69	15	0.00611191		21	49	16	15	1	1
ESC2	S000002771	YDR363W	Sumo-like domain protein	8	V	CC			0.959064							0.000128242	164	5	6.07383e-05			171	5	5	0	0
RGA2	S000002787	YDR379W	GTPase-activating protein for Cdc42p	8	V	P	1.5			0.0140444	39	16							0.00682631	26			25	15	7	16
HKR1	S000002828	YDR420W	Mucin family member that functions as an osmosensor in the HOG pathway	6	V	CY, P	1.15351	1.10241		0	131.5	2	0	91.5	1				0.00020369	114	83		4	3	1	2
DOT1	S000002848	PCH1, YDR440W	Nucleosomal histone H3-Lys79 methylase	60	V	CC			0.759259							0.00966918	41	15	0.00575336			54	16	15	0	1
LCD1	S000002907	PIE1, YDR499W, DDC2	Essential protein required for the DNA integrity checkpoint pathways	49	E	CC			0.983146							2.77809e-05	175	9	1.19624e-05			178	9	9	0	0
GIN4	S000002915	YDR507C, ERC47	Protein kinase involved in bud growth and assembly of the septin ring	32	V	CC, CY		2.54167	0.58				0.00315018	61	11	0.0133269	29	18	0.00599815		24	50	28	18	11	12
CDH1	S000002971	HCT1, YGL003C	Activator of anaphase-promoting complex/cyclosome (APC/C)	87	V	CC			0.638889							0.0166225	23	31	0.0082441			36	34	31	4	1
SCW11	S000002996	YGL028C	Cell wall protein with similarity to glucanases	5	V	CY		1.08929					0	91.5	6				0.00015354		84		8	2	6	1
ERV14	S000003022	YGL054C	Protein localized to COPII-coated vesicles	5	V	CY, P	0.918919	1.22807		0.0143885	34	2	0.02	35	2				0.00560224	37	28.5		2	0	2	2
SDS23	S000003024	YGL056C	Homolog of S. pombe Sds23 protein	3	V	CY													0.000178434				2	1	1	0
RAD6	S000003026	UBC2, YGL058W, PSO8	Ubiquitin-conjugating enzyme (E2)	302	V	CC			1.94444							0.0117831	35	14	0.0161773			18	15	14	1	1
MAD1	S000003054	YGL086W	Coiled-coil protein involved in the spindle-assembly checkpoint	46	V	CC			0.694444							0.00813043	50	24	0.00409082			72	25	24	5	1
SPC105	S000003061	YGL093W	Subunit of a kinetochore-microtubule binding complex	4	E	CC			0.989218							0	183.5	8	0			185.5	8	8	1	1
MLC1	S000003074	YGL106W	Essential light chain for Myo1p	21	V	CY		0.738095					0.022527	31	8				0.00358818		42		13	4	8	5
CDC20	S000003084	YGL116W, PAC5	Activator of anaphase-promoting complex/cyclosome (APC/C)	134	E	CC			1.02174							0.00339407	94	23	0.00245904			92	25	23	2	2
PCL10	S000003102	YGL134W	Pho85p cyclin	6	V	CC			0.621118							0.00272118	100	5	0.000281559			161	6	5	0	2
CDC43	S000003123	CAL1, YGL155W	Beta subunit of geranylgeranyltransferase type I	33	E	P	0.889764			0.000272338	113	2							3.27459e-05	127			2	1	0	2
RCK1	S000003126	YGL158W	Protein kinase involved in the response to oxidative stress	8	V	CC			0.955128							0.000598418	149	4	0.000324366			156	5	4	1	1
XRN1	S000003141	YGL173C, RAR5, KEM1, SKI1, SEP1, DST2	5'-3' exonuclease component of cytoplasmic processing (P) bodies	111	V	CC			1.30508							0.000553703	154	3	0.00128814			118	6	3	1	2
BUD13	S000003142	CWC26, YGL174W	Subunit of the RES complex	3	V	CY, P
CDC55	S000003158	YGL190C	Non-essential regulatory subunit B of protein phosphatase 2A (PP2A)	52	V	CC			1.125							0.0112923	36	27	0.0089503			32	30	27	4	7
HOS2	S000003162	YGL194C, RTL1	Histone deacetylase and subunit of Set3 and Rpd3L complexes	19	V	CC			1.32927							0.00227895	109	15	0.00333453			82	18	15	1	3
CLG1	S000003183	YGL215W	Cyclin-like protein that interacts with Pho85p	4	V	CC			0.901734							0.000527435	156	5	2.76059e-05			173	7	5	0	5
KIP3	S000003184	YGL216W	Kinesin-related motor protein involved in mitotic spindle positioning	28	V	P	1.37662			0.000573751	106	6							0.00209554	77			13	7	1	6
SEC15	S000003202	YGL233W	Essential 113kDa subunit of the exocyst complex	23	E	CY, P	1.02198	0.727273		0.00147542	93	14	0.0114747	48	9				0.00123924	91	66		17	5	9	14
DOC1	S000003209	APC10, YGL240W	Processivity factor required for the ubiquitination activity of the a	16	V	CC			0.697674							0.0130929	30	23	0.00698275			43	25	23	3	2
MSB2	S000003246	YGR014W	Mucin family member involved in filamentous growth signaling	23	V	P	1.80303			7.97801e-05	119	6							0.00287712	66			10	8	4	6
GSC2	S000003264	FKS2, YGR032W	Catalytic subunit of 1,3-beta-glucan synthase	41	V	P	0.277228			0.0165553	28	5							0.000643579	101			7	2	1	5
BUD9	S000003273	YGR041W	Protein involved in bud-site selection	11	V	CY, P	1.85366	0.151515		0.00333884	76	5	0.0948864	5	11				0.00490261	41	33		12	1	11	5
RME1	S000003276	YGR044C, CSP1	Serine kinase involved in cell cycling and pre-rRNA processing	6	V	CC			0.86							0.00136664	129	6	0.000425366			150		6	0	0
PEF1	S000003290	YGR058W	Penta-EF-hand protein required for bud growth and cell wall abscission	2	V	CY, P
ROM1	S000003302	YGR070W, SKC1	GDP/GTP exchange protein (GEP) for Rho1p	2	V	P	0.888889			0.000310261	112	5							3.79976e-05	126			5	1	0	5
TWF1	S000003312	YGR080W	Twinfilin	7	V	CY, P	0.930769	1.00549		6.56448e-05	121	3	0	91.5	2				1.50742e-05	130	91		3	0	2	3
ESP1	S000003330	YGR098C	Separase	32	E	CC			0.938144							0.00350929	91	16	0.00234361			97	18	16	3	2
CLB1	S000003340	SCB1, YGR108W	B-type cyclin involved in cell cycle progression	55	V	CC			0.611111							0.00638587	66	26	0.00182742			108	26	26	1	2
CLB6	S000003341	YGR109C	B-type cyclin involved in DNA replication during S phase	37	V	CC			0.518072							0.009136	43	26	0.00323971			83	26	26	2	2
RSR1	S000003384	BUD1, YGR152C	GTP-binding protein of the Ras family required for bud site selection	39	V	CY, P	1.14583	0.447368		0.00928602	55	15	0.0455489	17	10				0.00434619	48	38		22	13	10	15
BUB1	S000003420	YGR188C	Protein kinase involved in the cell cycle checkpoint into anaphase	49	V	CC			0.945055							0.0044172	86	18	0.00274201			91	20	18	4	2
ZPR1	S000003443	YGR211W	Essential protein with two zinc fingers	6	E	CC			0.989218							0	183.5	2	0			185.5	2	2	0	0
SMI1	S000003461	YGR229C, KNR4	Protein involved in the regulation of cell wall synthesis	19	V	CC			7							0.00113023	133	6	0.0155449			19	27	6	10	19
KEL2	S000003470	YGR238C	Protein that negatively regulates mitotic exit	3	V	CC			0.886792							0.000852574	141	7	0.000298546			159	8	7	0	3
SDA1	S000003477	YGR245C	Protein required for actin organization and passage through Start	5	E	CC			2.86719							0	183.5	1	0.00448343			64	6	1	5	3
BUD32	S000003494	LDB14, YGR262C	Protein kinase	14	V	CY, P													0				1	1	0	0
CTK2	S000003543	YJL006C	Beta subunit of C-terminal domain kinase I (CTDK-I)	4	V	CC			0.989218							0	183.5	3	0			185.5	3	3	0	0
MAD3	S000003550	YJL013C	Subunit of the spindle-assembly checkpoint complex	24	V	CC			0.985612							0.000911081	137	15	0.00065261			139	16	15	1	1
MAD2	S000003567	YJL030W	Component of the spindle-assembly checkpoint complex	94	V	CC			0.583333							0.0379398	7	39	0.0219311			12	44	39	4	6
RTT101	S000003583	CUL8, YJL047C, CULC	Cullin subunit of a Roc1p-dependent E3 ubiquitin ligase complex	20	V	CC			1.32039							0.000922093	136	6	0.00210095			103	7	6	1	2
BIT61	S000003594	YJL058C	Subunit of TORC2 (Tor2p-Lst8p-Avo1-Avo2-Tsc11p-Bit61p-Slm1p-Slm2p)	3	V	P	1.21759			0	131.5	8							0.0003454	108			10	3	1	8
NET1	S000003612	SRM8, CFI1, YJL076W, ESC5	Core subunit of the RENT complex	54	E	CC			0.889764							0.00204216	113	16	0.000912417			127	17	16	2	0
EXO70	S000003621	YJL085W	Subunit of the exocyst complex	15	E	CY, P	0.8125	0.646341		0.00151274	91	13	0.00820837	53	8				0.000224564	112	82		13	2	8	13
DPB11	S000003626	YJL090C	Replication initiation protein that loads DNA pol epsilon	52	E	CC			1.15873							0.000695074	146	11	0.000939245			126	12	11	1	0
BCK1	S000003631	SLK1, LAS3, SAP3, YJL095W, SSP31	MAPKKK acting in the protein kinase C signaling pathway	68	V	P	0.77551			0.0141644	38	15							0.00409321	49			21	8	9	15
IME2	S000003642	YJL106W, SME1	Serine/threonine protein kinase involved in activation of meiosis	89	V	CC			0.45							0.0198449	18	16	0.00753461			40	17	16	0	1
FAR1	S000003693	YJL157C	Cyclin-dependent kinase inhibitor	73	V	CC			1.35106							0.00139294	127	13	0.00237941			94	17	13	4	7
SET2	S000003704	EZL1, YJL168C	Histone methyltransferase with a role in transcriptional elongation	50	V	CC			0.671642							0.00887996	45	16	0.00433221			67	17	16	0	1
SWE1	S000003723	WEE1, YJL187C	Protein kinase that inhibits Cdc28p kinase activity	130	V	CC			2							0.0239685	14	34	0.0298192			7	50	34	20	26
BFA1	S000003814	IBD1, YJR053W	Component of the GTPase-activating Bfa1p-Bub2p complex	44	V	CC			0.845238							0.0058932	71	23	0.00321794			84	26	23	5	5
TOR1	S000003827	YJR066W, DRR1	PIK-related protein kinase and rapamycin target	144	V	CC			1.60714							0.00381984	90	5	0.00551677			56	15	5	2	10
RFC2	S000003829	YJR068W	Subunit of heteropentameric Replication factor C (RF-C)	23	E	CC			0.966102							6.06675e-05	171	4	1.73478e-05			177	4	4	0	0
CDC11	S000003837	YJR076C, PSL9	Component of the septin ring that is required for cytokinesis	53	E	CY, P	1.38095	0.895833		0.00209187	87	11	0.0136764	43	16				0.00311035	63	48		25	15	16	11
BIR1	S000003849	YJR089W	Subunit of chromosomal passenger complex	16	E	CC			3.11538							0.000269286	162	6	0.00581559			52	8	6	3	1
GRR1	S000003850	CAT80, COT2, YJR090C, SSU2, SDC1	F-box protein component of the SCF ubiquitin-ligase complex	84	V	CC			0.738095							0.0129431	31	12	0.00732603			42	17	12	8	8
BUD4	S000003852	YJR092W	Involved in bud-site selection and required for the axial budding pat	14	V	CY, P	1.48	0.0526316		0.0142519	37	11	0.136963	1	16				0.00687014	25	19		18	2	16	11
IME1	S000003854	YJR094C	Master regulator of meiosis that is active only during meiotic events	99	V	CC			0.730337							0.00644075	65	9	0.00291909			89	9	9	1	0
SPA2	S000003944	FUS6, YLL021W, PEA1	Component of the polarisome	65	V	CY, P	0.75	2.33333		0.0428401	9	20	0.038555	21	17				0.0140055	12	9		29	8	17	20
LDB18	S000003972	YLL049W	Component of the dynactin complex	4	V	P	0.844828			0.00107825	98	6							0.000181123	116			10	4	1	6
BUD20	S000004064	YLR074C	Protein involved in bud-site selection	0	V	CY, P	0.902985	0.961905		0.00714211	60.5	3	0.00989899	50.5	4				0.00279325	67	52.5		5	1	4	3
SIC1	S000004069	YLR079W, SDB25	Cyclin-dependent kinase inhibitor that controls G1/S phase transition	156	V	CC			0.5							0.0289221	10	35	0.0137865			20	36	35	3	3
RAX2	S000004074	YLR084C	N-glycosylated protein involved in maintenance of bud site selection	4	V	CY, P	0.966912	0.943299		0	131.5	3	0	91.5	3				0	136	97		3	0	3	3
ACE2	S000004121	YLR131C	Transcription factor required for septum destruction after cytokinesis	60	V	CY		2.54545					0.0254986	28	6				0.011759		11		16	8	6	6
SEC10	S000004156	YLR166C	Essential 100kDa subunit of the exocyst complex	10	E	CY, P	0.89899	0.666667		0.00197333	89	13	0.0121991	46	9				0.000809495	99	69		14	2	9	13
CLB4	S000004200	YLR210W	B-type cyclin involved in cell cycle progression	23	V	CC			1.15517							0.000977455	134	15	0.00130001			116	20	15	1	6
CDC123	S000004205	YLR215C	Protein involved in nutritional control of the cell cycle	1	E	CC			0.989218							0	183.5	2	0			185.5	2	2	0	2
CDC42	S000004219	YLR229C	Small rho-like GTPase	292	E	CC, P	1		29.5	0.236262	1	55				0.00753732	59	19	0.0694026	1		2	66	19	30	55
RCK2	S000004238	CLK1, CMK3, YLR248W	Protein kinase involved in response to oxidative and osmotic stress	16	V	CC			0.633588							0.00472577	83	6	0.000865648			131	6	6	0	0
RED1	S000004253	YLR263W	Protein component of the synaptonemal complex axial elements	47	V	CC			0.74026							0.00785561	57	10	0.003829			77	10	10	0	1
CTS1	S000004276	YLR286C	Endochitinase	38	V	CY		0.528571					0.016895	37	5				0.000765519		70		5	0	5	1
MEC3	S000004279	YLR288C, PIP3, PSO9	DNA damage and meiotic pachytene checkpoint protein	65	V	CC			1.21875							0.00185192	117	16	0.00235971			96	18	16	2	1
CDC25	S000004301	CDC25', CTN1, YLR310C	Membrane bound guanine nucleotide exchange factor	248	E	CC			1.14444							0.00252854	103	11	0.00279542			90	14	11	2	4
SPH1	S000004305	YLR312C-B, YLR313C	Protein involved in shmoo formation and bipolar bud site selection	4	V	CY, P	1	7.03846		0.0285684	15	4	0	91.5	3				0.011173	15	13		4	0	3	4
CDC3	S000004306	YLR314C	Component of the septin ring that is required for cytokinesis	75	E	CY, P	1.24691	0.852459		0.000822936	101	8	0.00910259	52	15				0.00162978	81	61		19	10	15	8
BUD6	S000004311	YLR319C, AIP3	Actin- and formin-interacting protein	36	V	CY, P	0.285714	1.08333		0.0743677	4	13	0.0521264	13	10				0.0115158	14	12		17	7	10	13
SFH1	S000004313	YLR321C	Component of the RSC chromatin remodeling complex	9	E	CC			0.830508							0.00840932	49	4	0.00496451			59	4	4	0	0
CHS5	S000004322	YLR330W, CAL3	Component of the exomer complex	14	V	CY, P	0.8	0.692308		0.00453107	72	9	0.0125528	45	7				0.00128753	90	65		11	1	7	9
MID2	S000004324	YLR332W, KAI1	Transmembrane sensor for cell wall integrity signaling	45	V	P	0.781609			0.00637835	68	9							0.00134436	87			12	3	2	9
VRP1	S000004329	YLR337C, YLR337W, END5, MDP2	Proline-rich actin-associated protein	26	V	CY, P	0.697368	0.711864		0.0105053	53	13	0.0137329	42	12				0.00210559	76	59		15	2	12	13
FKS1	S000004334	YLR342W, GSC1, CND1, ETG1, PBR1, CWH53	Catalytic subunit of 1,3-beta-D-glucan synthase	56	V	P	1.23529			0.0233258	21	12							0.0101522	17			22	7	5	12
BUD8	S000004345	YLR353W	Protein involved in bud-site selection	17	V	CY, P	0.826087	0.777778		0.0235803	19	11	0.0509963	14	10				0.00743017	23	18		11	0	10	11
DCR2	S000004353	YLR361C	Phosphoesterase involved in downregulation of the UPR	5	V	CC			0.858025							0.000894286	139	5	0.00027964			162	5	5	0	0
ROM2	S000004363	YLR371W	GDP/GTP exchange factor (GEF) for Rho1p and Rho2p	36	V	P	0.421053			0.0504997	8	19							0.00946093	19			23	6	3	19
TSA1	S000004490	TPX1, YML028W, ZRG14	Thioredoxin peroxidase	41	V	CC			1.01							0.00255013	101	13	0.00216564			100	14	13	0	1
TEM1	S000004529	YML064C	GTP-binding protein of the Ras family involved in M-phase termination	59	E	CC			1.15116							0.00282053	99	18	0.00303453			86	24	18	9	7
FPR3	S000004539	NPI46, YML074C	Nucleolar peptidyl-prolyl cis-trans isomerase (PPIase)	13	V	CC			1.21523							0	183.5	1	0.000379402			151	2	1	1	1
ZDS2	S000004577	CES4, YML109W	Protein with a role in regulating Swe1p-dependent polarized growth	18	V	CC, P	1.06667		1.20792	0.00246106	80	10				0.00159796	122	14	0.00211599	75		101	18	14	8	10
CDC5	S000004603	PKX2, MSD2, YMR001C	Polo-like kinase with multiple functions in mitosis and cytokinesis	146	E	CC			0.461538							0.0428158	6	45	0.0209616			13	50	45	12	7
HOF1	S000004635	YMR032W, CYK2	Bud neck-localized	19	V	CY		0.527778					0.0449315	19	16				0.0048263		36		22	8	16	8
MIH1	S000004639	YMR036C	Protein tyrosine phosphatase involved in cell cycle control	17	V	CC			1.21053							0.00348268	92	20	0.00385373			76	24	20	7	6
CSM3	S000004651	YMR048W	Replication fork associated factor	14	V	CC			0.821918							0.00179619	120	13	0.000563234			146	13	13	0	0
BUB2	S000004659	YMR055C, PAC7	Mitotic exit network regulator	74	V	CC			0.952381							0.0178162	20	31	0.0128566			21	36	31	5	12
AVO2	S000004672	YMR068W	Component of a complex containing the Tor2p kinase and other proteins	5	V	P	0.881356			0.000708643	104	9							0.00016951	118			10	2	1	9
YPK2	S000004710	YKR2, YMR104C	Protein kinase with similarity to serine/threonine kinase Ypk1p	14	V	P	0.887097			0.000369807	110	4							6.21914e-05	124			5	2	1	4
MYO5	S000004715	YMR109W	One of two type I myosins	17	V	CY, P	0.66129	1.51064		0.0133141	41	12	0.00115847	71	7				0.003149	62	47		13	2	7	12
GID8	S000004742	DCR1, YMR135C	Protein of unknown function	4	V	CC			0.989218							0	183.5	3	0			185.5	3	3	0	0
NUP53	S000004762	YMR153W	Subunit of the nuclear pore complex (NPC)	4	V	CC			1.28947							0.000674791	147	5	0.00137151			114	8	5	4	4
CEP3	S000004778	YMR168C, CBF3, CSL1, CBF3B	Essential kinetochore protein	57	E	CC			0.990654							0.00235245	106	12	0.00182857			107	12	12	2	2
SGS1	S000004802	YMR190C	Nucleolar DNA helicase of the RecQ family	215	V	CC			0.459459							0.0118048	34	20	0.00401206			74	20	20	0	0
CIK1	S000004811	YMR198W	Kinesin-associated protein	19	V	P	0.607595			0.0109539	48	7							0.00187218	79			11	4	1	7
CLN1	S000004812	YMR199W	G1 cyclin involved in regulation of the cell cycle	198	V	CC			0.85							0.00603562	68	24	0.00353339			80	31	24	10	7
ROT1	S000004813	YMR200W	Molecular chaperone involved in protein folding in the ER	8	E	CY, P	1.10504			0	131.5	2							0.000149837	119			5	4	0	2
FUS2	S000004845	YMR232W	Cytoplasmic protein localized to the shmoo tip	17	V	P	0.637681			0.0123704	44	9							0.00259568	69			10	3	4	9
ZDS1	S000004886	CES1, NRC1, CKM1, YMR273C, OSS1	Protein with a role in regulating Swe1p-dependent polarized growth	30	V	CC, P	5.625		0.962963	0.0016163	90	4				0.0149167	26	22	0.0106082	16		27	24	22	3	4
JNM1	S000004908	INS1, YMR294W, PAC3	Component of the yeast dynactin complex	17	V	P	0.876404			0.00273439	78	7							0.00130321	89			14	7	1	7
FKS3	S000004923	YMR306W	Protein involved in spore wall assembly	1	V	P	0.966912			0	131.5	2							0	136			3	1	0	2
PSE1	S000004925	KAP121, YMR308C	Karyopherin/importin that interacts with the nuclear pore complex	26	E	CC			1.26606							0.000897032	138	6	0.00173617			109	9	6	4	1
LST8	S000004951	YNL006W	Protein required for the transport of Gap1p to the cell surface	13	E	P	0.92			0.00148577	92	9							0.000667603	100			11	3	1	9
ARK1	S000004965	YNL020C	Ser/thr protein kinase involved in regulating the actin cytoskeleton	16	V	CY		0.27027					0.0396652	20	5				0.00042133		74		6	0	5	5
SSN8	S000004970	GIG3, NUT9, UME3, RYE2, SRB11, YNL025C, CycC	Cyclin-like component of the RNA polymerase II holoenzyme	35	V	CC			0.857143							0.00254691	102	5	0.00125907			119	7	5	1	2
HHT2	S000004976	YNL031C	Histone H3	6	V	CC			0.512821							0.0101954	40	17	0.00361794			78	17	17	1	0
SLM2	S000004992	YNL047C, LIT1	Phosphoinositide PI4,5P(2) binding protein	10	V	P	3.5			0.00217071	84	10							0.0069407	24			14	5	2	10
SUN4	S000005010	YNL066W, SCW3	Cell wall protein related to glucanases	4	V	CY		1.22807					0.02	35	7				0.00560224		28.5		8	1	7	1
NIS1	S000005022	JIP1, YNL078W	Protein localized in the bud neck at G2/M phase	4	V	CC			2.87234							0.000966091	135	5	0.00625949			47	15	5	12	6
TPM1	S000005023	YNL079C	Major isoform of tropomyosin	25	V	P	0.927273			0.0105698	51	12							0.00374952	55			16	4	8	12
END3	S000005028	YNL084C	EH domain-containing protein involved in endocytosis	50	V	CY, P	1	1.19118		0.00130803	96	6	4.0404e-05	81	5				0.00101537	96	68		8	1	5	6
TOP2	S000005032	YNL088W, TRF3, TOR3	Topoisomerase II	95	E	CC			1.15217							0.000386113	159	5	0.00065455			138	6	5	1	1
RHO2	S000005034	YNL090W	Non-essential small GTPase of the Rho/Rac family of Ras-like proteins	20	V	P	0.893617			0.0130516	42	13							0.00436319	47			15	4	1	13
POL1	S000005046	HPR3, YNL102W, CDC17, CRT5	Catalytic subunit of the DNA polymerase I alpha-primase complex	117	E	CC			0.859155							0.00695914	61	12	0.00412722			71	12	12	0	0
NOP15	S000005054	YNL110C	Constituent of 66S pre-ribosomal particles	4	E	CY		1.71429					0.0560093	12	6				0.0159909		7		11	4	6	5
DMA2	S000005060	CHF2, YNL116W	Protein involved in ubiquitination	4	V	CC, P	1.87692		0.704545	4.9626e-05	122	4				0.0066999	62	7	0.00297334	65		88	9	7	2	4
SRV2	S000005082	CAP, YNL138W	CAP (cyclase-associated protein) subunit of adenylyl cyclase complex	487	V	P	0.803922			0.00221831	82	7							0.000630127	102			7	0	7	7
INN1	S000005096	YNL152W	Essential protein that associates with the contractile actomyosin ring	5	E	CY		0.994565					0	91.5	4				1.18547e-05		92		5	1	4	0
YCK2	S000005098	YNL154C	Palmitoylated plasma membrane-bound casein kinase I isoform	28	V	CY, P		0.583333					0.02	35	2				0.00190169		60		9	7	2	1
CBK1	S000005105	YNL161W	Serine/threonine protein kinase of the the RAM signaling network	32	E	CY, P	1.13636	0.647059		0.0176236	25	9	0.0577335	11	7				0.0078353	22	17		16	5	7	9
IBD2	S000005108	YNL164C	Component of the BUB2-dependent spindle checkpoint pathway	1	V	CC			0.989218							0	183.5	4	0			185.5	4	4	0	0
BNI5	S000005110	YNL166C	Protein involved in organization of septins at the mother-bud neck	5	V	CY		0.764045					0.00132632	68	8				6.31173e-05		89		8	1	8	4
CHS1	S000005136	YNL192W, USA4	Chitin synthase I	33	V	CY
PSY2	S000005145	YNL201C	Subunit of protein phosphatase PP4 complex	9	V	CC			1.31818							0.00433576	87	11	0.0043552			66	14	11	0	3
BNI4	S000005177	YNL233W	Targeting subunit for Glc7p protein phosphatase	9	V	CY		1.12					0.00458698	56	12				0.00287274		50		23	8	12	13
SLA2	S000005187	YNL243W, END4, MOP2	Transmembrane actin-binding protein	74	V	CY, P	0.810345	0.348837		0.0112171	47	11	0.0498139	15	12				0.00336752	58	43		16	3	12	11
BNI1	S000005215	SHE5, PPF3, YNL271C	Formin	88	V	CY, P	0.5	0.5		0.111446	2	37	0.124679	2	25				0.0316522	4	4		51	16	25	37
TOF1	S000005217	YNL273W	Subunit of a replication-pausing checkpoint complex	32	V	CC			0.850299							0.000778897	142	11	0.000223387			167	11	11	0	0
PCL1	S000005233	YNL289W, HCS26	Cyclin	30	V	CC, P	1.52174		0.646154	0.00595107	70	12				0.00961161	42	13	0.0044528	46		65	23	13	7	12
CLA4	S000005242	YNL298W, ERC10	Cdc42p-activated signal transducing kinase of the PAK family	67	V	CC, CY, P	1.66667	1.5	3.66667	0.066388	5	35	0.110114	3	28	0.0271793	11	30	0.035739	3	2	3	61	30	28	35
EGT2	S000005271	YNL327W	Glycosylphosphatidylinositol (GPI)-anchored cell wall endoglucanase	14	V	CY		1.17593					0.00259117	63.5	7				0.00265228		54		11	4	7	2
RPD3	S000005274	MOF6, REC3, SDI2, SDS6, YNL330C	Histone deacetylase	160	V	CC			0.818182							0.0367718	9	29	0.0243271			11	33	29	3	2
BUD17	S000005310	YNR027W	Putative pyridoxal kinase	0	V	CY, P													0				1	0	1	1
DSE4	S000005350	ENG1, YNR067C	Daughter cell-specific secreted protein with similarity to glucanases	5	V	CY		0.943299					0	91.5	6				0		97		7	1	6	1
PHO80	S000005361	YOL001W, AGS3, phoR, TUP7, VAC5	Cyclin	96	V	CC			1							0.00012004	165	3	0.000259026			165	5	3	0	2
THP1	S000005433	BUD29, YOL072W	Nuclear pore-associated protein	14	V	CY, P													0.000228865				4	4	0	0
AVO1	S000005438	YOL078W	Component of a membrane-bound complex containing the Tor2p kinase	5	E	P	0.880342			0.000752294	103	9							0.000173153	117			10	2	1	9
MSH2	S000005450	YOL090W, PMS5	Protein that binds to DNA mismatches to initiate mismatch repair	191	V	CC			0.977273							5.92095e-05	172	4	1.84422e-05			176	4	4	0	0
NDJ1	S000005464	YOL104C, TAM1	Meiosis-specific telomere protein	22	V	CC			0.972067							2.78474e-05	174	3	7.86832e-06			179	3	3	0	0
MDY2	S000005471	YOL111C, GET5, TMA24	Protein involved in inserting tail-anchored proteins into ER membranes	10	V	P	0.966912			0	131.5	1							0	136			1	0	0	1
SKM1	S000005473	YOL113W	Member of the PAK family of serine/threonine protein kinases	3	V	CY		0.943299					0	91.5	2				0		97		3	3	2	3
CDC33	S000005499	TIF45, YOL139C	Translation initiation factor eIF4E and mRNA cap binding protein	16	E	CC			0.927419							0.00191801	115	3	0.000977927			124	7	3	2	2
SLG1	S000005534	HCS77, YOR008C, WSC1	Sensor-transducer of the stress-activated PKC1-MPK1 kinase pathway	58	V	P	0.793814			0.00332934	77	9							0.000945913	97			11	4	2	9
RTS1	S000005540	SCS1, YOR014W	B-type regulatory subunit of protein phosphatase 2A (PP2A)	21	V	CC			0.936709							0.00570355	74	17	0.00358273			79	22	17	5	9
BUB3	S000005552	YOR026W	Kinetochore checkpoint WD40 repeat protein	29	V	CC			0.888							0.00215858	111	19	0.000968863			125	19	19	1	0
SGT1	S000005583	YOR057W, YOR29-08	Cochaperone protein	15	E	CC			0.971264							8.08001e-05	169	3	2.23235e-05			174	3	3	1	0
ASE1	S000005584	YOR058C, YOR29-09	Mitotic spindle midzone localized MAP family member	17	V	CC, CY		1.25342	1.07092				0	91.5	1	0.000592942	151	9	0.00064809		73	141	13	9	1	4
SGO1	S000005599	YOR073W, YOR29-24	Component of the spindle checkpoint	23	V	CC			0.718182							0.00489774	79	17	0.00162122			110	17	17	1	1
ARF3	S000005620	ARL2, YOR094W	Glucose-repressible ADP-ribosylation factor	18	V	CY, P	0.885714	1.22222		0.014731	31	5	0.0204227	33	5				0.00562597	35	27		5	0	5	5
RIO1	S000005645	RRP10, YOR119C	Serine kinase involved in cell cycling and pre-rRNA processing	7	E	CC													0				1	0	1	0
RGA1	S000005653	DBM1, YOR127W, THE1	GTPase-activating protein for Cdc42p	11	V	P	1.16216			0.00209263	86	12							0.00216539	74			18	10	9	12
AFI1	S000005655	YOR129C	Arf3p polarization-specific docking factor	2	V	CY, P	0.966912	0.943299		0	131.5	1	0	91.5	1				0	136	97		1	0	1	1
GAC1	S000005704	YOR178C	Regulatory subunit for Glc7p type-1 protein phosphatase (PP1)	16	V	CC			0.685315							0.00285353	98	4	0.000600572			143	5	4	0	2
LAS17	S000005707	BEE1, YOR181W	Actin assembly factor	44	E	CY, P	0.84375	1.3913		0.0171654	27	17	0.0223366	32	15				0.00609567	32	23		21	3	15	17
MSB1	S000005714	YOR188W	Protein involved in regulating 1,3-beta-glucan synthesis	7	V	P	0.718447			0.00367121	74	9							0.000473021	103			10	5	3	9
BFR1	S000005724	YOR198C	Component of mRNP complexes associated with polyribosomes	6	V	CC													0				1	0	0	1
KIN4	S000005759	KIN3, YOR233W, KIN31	Serine/threonine protein kinase of the mitotic exit network (MEN)	21	V	CC			0.907975							0.000643207	148	9	0.000259838			163	10	9	2	3
HES1	S000005763	YOR237W, OSH5	Protein implicated in the regulation of ergosterol biosynthesis	6	V	P	0.890625			0.000260661	114	2							2.70371e-05	128			2	0	0	2
ESA1	S000005770	YOR244W, TAS1	Catalytic subunit of the histone acetyltransferase complex NuA4	48	E	CC			1.05844							0.000261916	163	7	0.000353946			154	8	7	1	1
BUD7	S000005825	YOR299W	Member of the ChAPs family of proteins	1	V	CY, P	0.771084	0.145161		0.00689254	64	4	0.0618735	9	5				0.00149951	83	62		5	0	5	4
RAX1	S000005827	YOR301W	Protein involved in bud site selection during bipolar budding	6	V	CY, P	0.909836	0.850575		0.00031282	111	4	0.000639731	74	4				0.000102828	122	87		4	0	4	4
MYO2	S000005853	CDC66, YOR326W	Type V myosin motor involved in actin-based transport of cargos	97	E	CY, P	0.923077	0.8		0.0323632	12	22	0.0639369	8	17				0.0123165	13	10		32	8	17	22
MEK1	S000005878	YOR351C, MRE4	Meiosis-specific serine/threonine protein kinase	47	V	CC			0.885906							0.00117403	132	6	0.000514406			149	5	6	0	1
SOG2	S000005880	YOR353C	Key component of the RAM signaling network	2	E	CY		0.943299					0	91.5	3				0		97		5	0	3	4
RAD17	S000005895	YOR368W	Checkpoint protein	99	V	CC			0.545455							0.0250538	12	23	0.0121261			22	24	23	1	0
IRC15	S000005938	YPL017C	Microtubule associated protein	2	V	CC			0.989218							0	183.5	3	0			185.5	3	3	0	0
PHO85	S000005952	phoU, LDB15, YPL031C	Cyclin-dependent kinase	130	V	P	8.66667			0.0105284	52	12							0.022885	6			36	26	7	12
BEM3	S000006036	YPL115C	Rho GTPase activating protein (RhoGAP)	13	V	P	0.811765			0.00595363	69	14							0.0014478	85			17	8	9	14
RNY1	S000006044	YPL123C	Vacuolar RNase of the T(2) family	2	V	P													0				1	1	0	0
UME1	S000006060	YPL139C, WTM3	Negative regulator of meiosis	6	V	CC			1.00581							5.89428e-05	173	8	3.34102e-05			172	9	8	0	1
KES1	S000006066	BSR3, LPI3, OSH4, YPL145C	Member of the oxysterol binding protein family	23	V	P	0.482759			0.0289822	14	10							0.0063592	29			10	2	4	10
RAD53	S000006074	MEC2, SPK1, LSD1, YPL153C	Protein kinase	400	E	CC			0.8							0.0466825	4	41	0.0313472			5	52	41	13	12
BEM4	S000006082	ROM7, YPL161C	Protein involved in establishment of cell polarity and bud emergence	6	V	P	0.605634			0.0126427	43	16							0.00252709	71			17	6	8	16
NIP100	S000006095	PAC13, YPL174C	Large subunit of the dynactin complex	6	V	P	0.866667			0.0176181	26	8							0.0061986	30			13	6	2	8
DDC1	S000006115	YPL194W	DNA damage checkpoint protein	42	V	CC			0.826531							0.00482427	81	18	0.00224697			98	18	18	0	0
CSM4	S000006121	YPL200W	Protein required for accurate chromosome segregation during meiosis	5	V	CC			0.941176							0.000304356	160	3	0.000121643			170	3	3	0	0
IPL1	S000006130	YPL209C, PAC15	Aurora kinase subunit of the conserved chromosomal passenger complex	72	E	CC, CY		4.6875	0.735294				0.000549543	75	3	0.0161767	25	26	0.00846491		16	34	29	26	3	2
PCL8	S000006140	YPL219W	Cyclin	5	V	CC			0.700855							0.00476476	82	10	0.00129744			117	11	10	0	3
IQG1	S000006163	CYK1, YPL242C	Essential protein required for determination of budding pattern	13	E	CY		0.634146					0.0323496	26	15				0.00366327		41		19	4	15	9
CLN2	S000006177	YPL256C	G1 cyclin involved in regulation of the cell cycle	245	V	CC			0.833333							0.0448788	5	38	0.0299254			6	49	38	15	16
CCL1	S000006229	YPR025C	Cyclin associated with protein kinase Kin28p	10	E	CC			0.606061							0.00745631	60	11	0.00221568			99	12	11	0	1
SRO7	S000006236	SNI1, SOP1, YPR032W	Effector of Rab GTPase Sec4p	22	V	P	0.882979			0.0021729	83	11							0.00106191	94			13	2	9	11
SMK1	S000006258	YPR054W	Middle sporulation-specific mitogen-activated protein kinase (MAPK)	18	V	P	1.16372			0	131.5	1							0.000205724	113			4	3	0	1
SEC8	S000006259	YPR055W	Essential 121kDa subunit of the exocyst complex	19	E	CY, P	0.981818	0.86875		0.000479771	108	11	0.00125485	69.5	8				0.000294478	110	80		12	2	8	11
OPY2	S000006279	YPR075C	Integral membrane protein involved in HOG pathway signaling	3	V	CC			1.0858							0	183.5	1	0.000125678			169	5	1	3	4
CLB2	S000006323	YPR119W	B-type cyclin involved in cell cycle progression	215	V	CC			1.375							0.0172096	22	40	0.0171054			16	47	40	11	8
CLB5	S000006324	YPR120C	B-type cyclin involved in DNA replication during S phase	118	V	CC			0.333333							0.0509192	3	41	0.0265139			9	45	41	3	4
AXL1	S000006326	FUS5, YPR122W, STE22	Haploid specific endoprotease of a-factor mating pheromone	16	V	CY, P	0.805556	0.982143		0.00778693	58	7	0.00668624	55	6				0.00237204	72	56		7	0	6	7
MLC2	S000006392	YPR188C	Regulatory light chain for the type II myosin	2	V	CY		0.943299					0	91.5	4				0		97		4	0	4	1
HTL1	S000006439	YCR020W-B	Component of the RSC chromatin remodeling complex	7	V	CC			0.989218							0	183.5	2	0			185.5	2	2	0	0
SEM1	S000007235	YDR363W-A, HOD1, DSS1	Component of the lid of the regulatory subunit of the 26S proteasome	22	V	CC			1.53763							0.000766277	143	4	0.00240358			93	9	4	6	6
HUB1	S000007251	YNR032C-A	Ubiquitin-like protein modifier	6	V	P	0.918919			0.0143885	34	2							0.00560224	37			2	0	1	2
NME1	S000007436	RRP2	RNA component of RNase MRP	14	V	CC
HUG1	S000007472	YML058W-A	Protein involved in the Mec1p-mediated checkpoint pathway	12	V	CC			0.989218							0	183.5	1	0			185.5	1	1	0	0
BUD25	S000007590	YER014C-A	Protein involved in bud-site selection	1	V	CY, P
